# Supplementary material for: MYC suppresses STING-dependent innate immunity by transcriptionally upregulating DNMT1 in triple-negative breast cancer
Source: PubMed Central journal article supplement — J Immunother Cancer. 2021 Jul 28;9(7):e002528. doi: 10.1136/jitc-2021-002528 (PMC8320259; doi:10.1136/jitc-2021-002528), 2021-07-28
Supplement: jitc-2021-002528supp001.pdf [file jitc-2021-002528supp001.pdf]

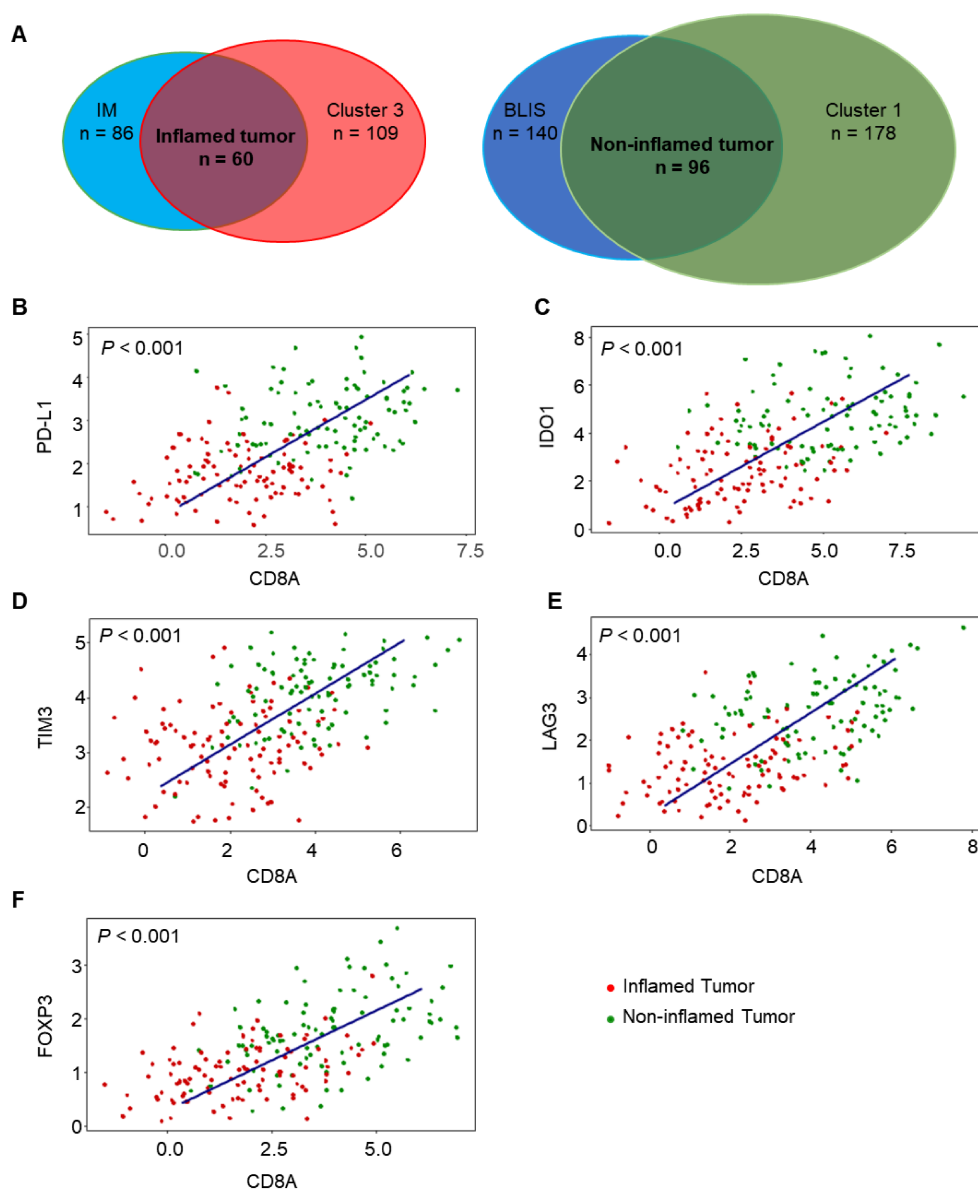

**Supplemental Figure S1. Definition and characteristics of two distinct microenvironmental subtypes in our study.**

(A) Definition of the “Inflamed tumor” (IM & cluster 3) and “non-inflamed tumor” (BLIS & cluster 1) immune microenvironment in our study. (B) Positive correlation between the expression of *PD-L1* and that of *CD8A* ( $P < 0.001$ , Pearson correlation). Inflamed tumors (red) show higher expression of both genes than non-inflamed tumors (blue). (C-F) The additional immune-inhibitory molecules, *IDO1* (C), *TIM3* (D), *LAG3* (E) and *FOXP3* (F), showing similar significant correlations (all  $P < 0.001$ , Pearson correlation). IM, immunomodulatory; BLIS, basal-like immune-suppressed.

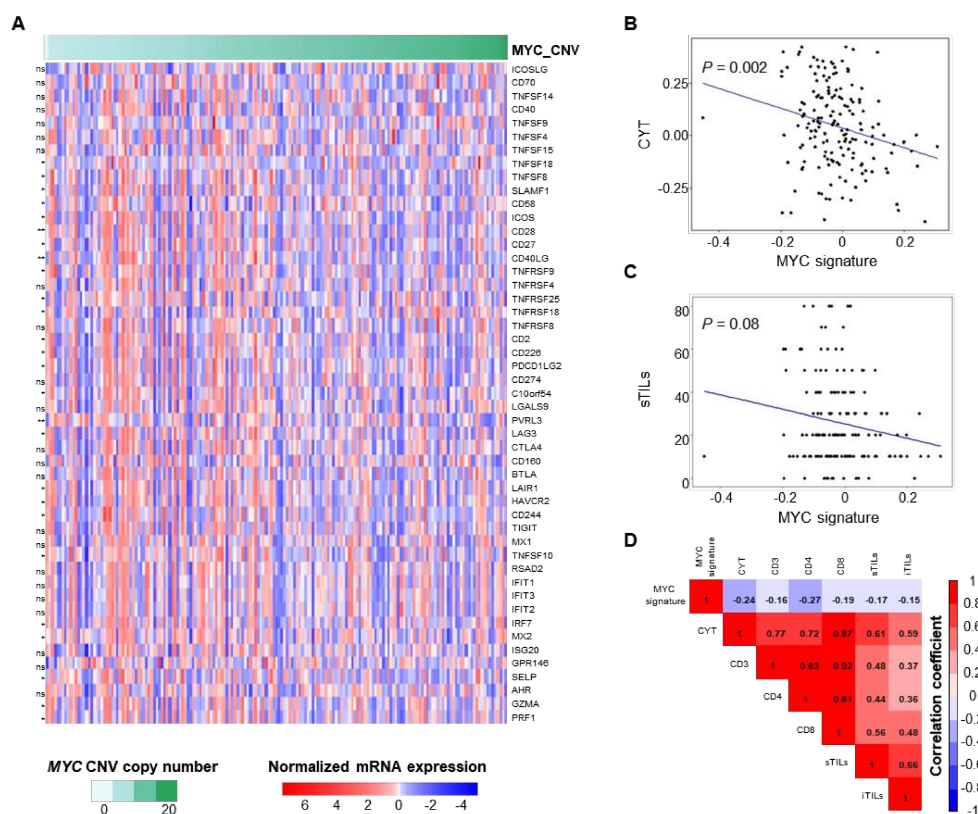

**Supplemental Figure S2. Correlations between *MYC* amplification, expression and immune-related indicators.**

(A) Heatmap showing the relationship between *MYC* CNV levels and immune-related genes. (B-C) Correlations of the CYT (B), sTILs (C) and *MYC* transcriptional signature in TNBC patients from the FUSCC cohort. (D) Heatmap correlation matrix of the association of the *MYC* transcriptional signature and classic IHC markers in TNBC. CNV, copy number variation; CYT, cytolytic activity; sTILs, stromal tumor-infiltrating lymphocytes. Pearson correlation was used to assess the relationship between two indicators.

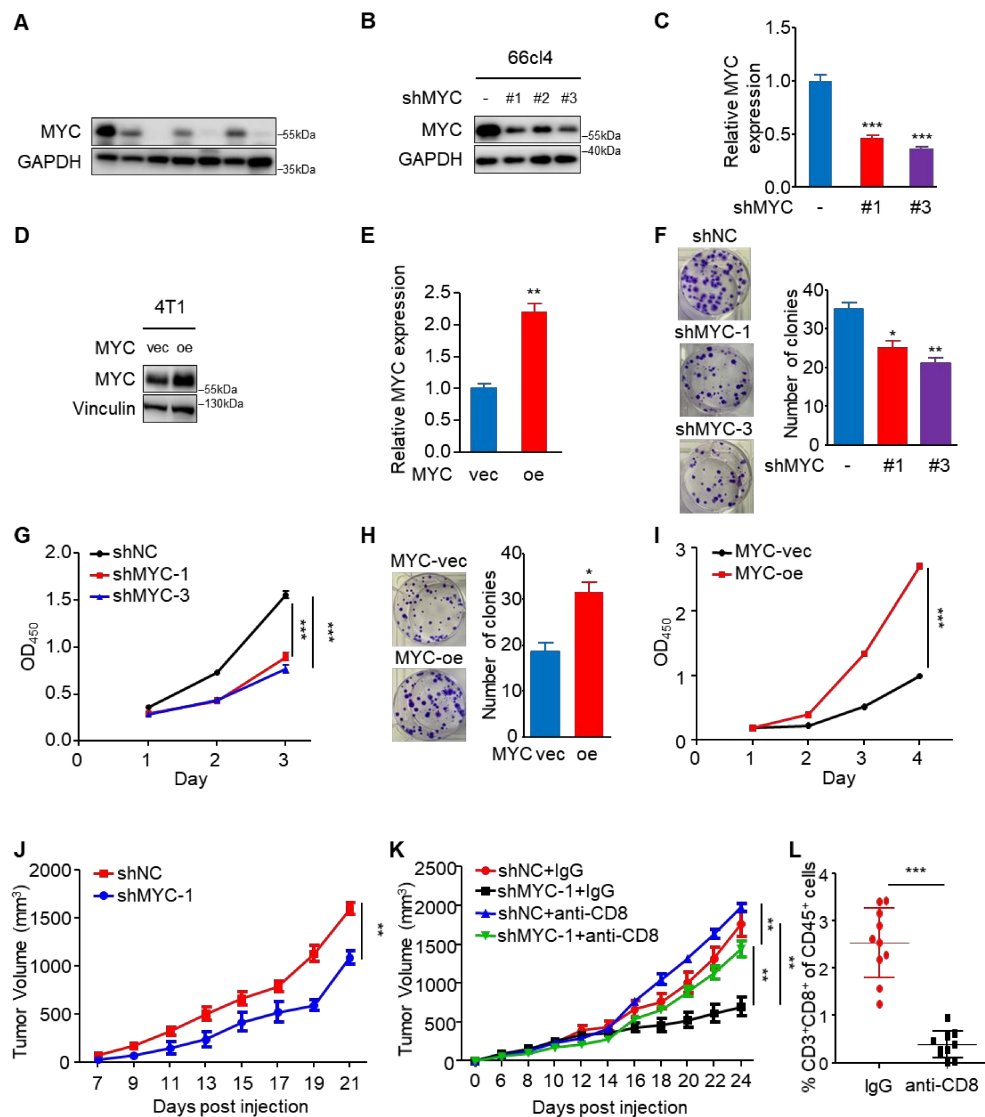

### Supplemental Figure S3. The effects of MYC knockdown and overexpression on cell proliferation and tumor growth.

(A) Immunoblotting analyses of MYC in murine cell lines (67NR, 66c14, TS/A, 4T1, 4T07, 4T1.2, 168FARN). (B-C) Immunoblotting (B) and RT-qPCR (C) analyses to confirm MYC knockdown at the protein and mRNA levels in 66c14 cells. (D-E) Immunoblotting (D) and RT-qPCR (E) analyses to confirm MYC overexpression at the mRNA and protein levels in 4T1 cells. (F) Representative images of surviving colonies with 66c14 cells expressing shNC/MYC and the corresponding quantitative results. (G) *In vitro* growth curves of 66c14 cells evaluated by a CCK-8 assay. (H) Representative images of surviving colonies with 4T1 cells expressing MYC-vec/oe and the corresponding quantitative results. (I) *In vitro* growth curves of 4T1 cells evaluated by a CCK-8 assay. (J) Tumor volumes of 66c14-shNC and 66c14-shMYC subcutaneous tumors in NSG mice (21 days; n = 5), as measured using calipers. (K) Tumor volumes of 66c14-shNC and 66c14-shMYC subcutaneous tumors

in BALB/c mice (24 days; n = 5) treated with rat IgG or CD8-depleting antibody, as measured using calipers. **(L)** Percentage of CD3<sup>+</sup>CD8<sup>+</sup> T cells in CD45<sup>+</sup> cells in the blood from mice treated with rat IgG or CD8-depleting antibody (n = 10 mice per group) as measured by flow cytometry. The data are presented as the mean ± SEM (C, E, F, G, H, I, J, K and L); two-tailed unpaired Student's t test (C, E, F, H and L); one-way ANOVA test after adjusting for multiple comparisons (G, I, J and K). \**P* < 0.05; \*\**P* < 0.01; \*\*\**P* < 0.001. ANOVA, analysis of variance; RT-qPCR, quantitative reverse transcription PCR; SEM, standard error of mean.

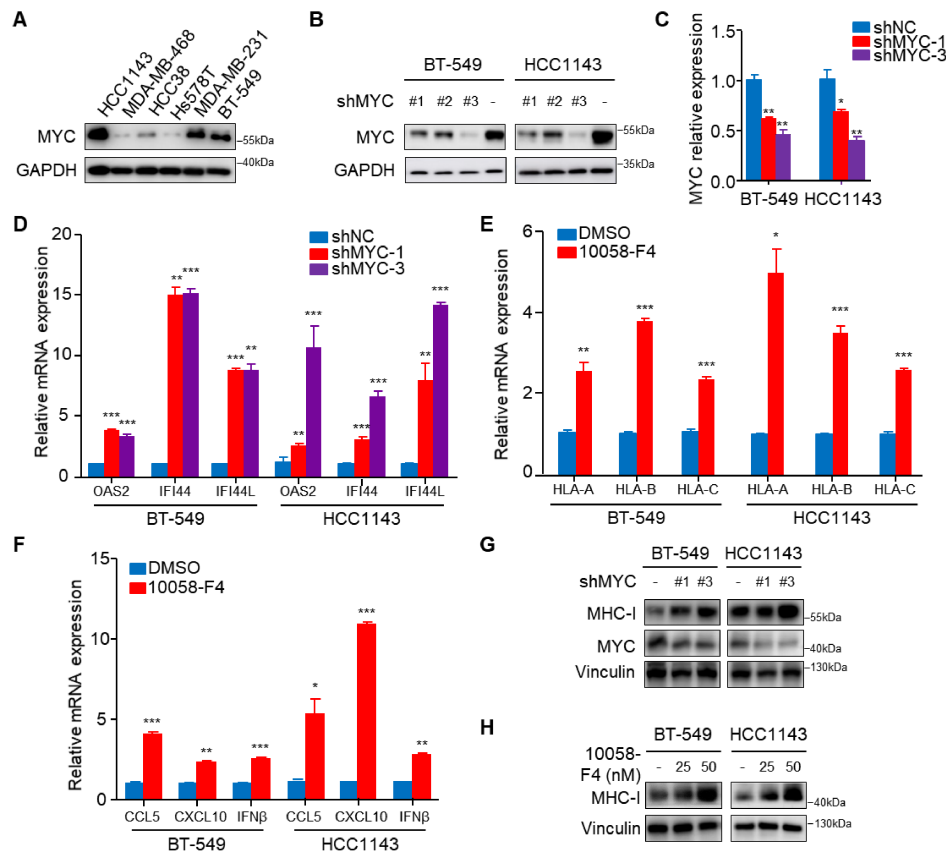

**Supplemental Figure S4. MYC knockdown verification, and analyses of interferon downstream gene expressions after MYC knockdown or treatment with 10058-F4 in human TNBC cell lines.**

(A) Immunoblotting analyses of MYC in human TNBC cell lines (HCC1143, MDA-MB-468, HCC38, Hs578T, MDA-MB-231, and BT-549). (B-C) Immunoblotting (B) and RT-qPCR (C) analyses to confirm MYC knockdown at the mRNA and protein levels in BT-549 and HCC1143 cells. (D) RT-qPCR analyses of the mRNA expression of ISGs including OAS2, IFI44, and IFI44L in BT-549 and HCC1143 cells with MYC knockdown. (E) RT-qPCR analyses of MHC-I mRNA expression in BT-549 and HCC1143 cells after treatment with DMSO or 10058-F4 (25 nM or 50 nM). (F) RT-qPCR analyses of CCL5, CXCL10 and IFN $\beta$  mRNA expression in BT-549 and HCC1143 cells after treatment with DMSO or 10058-F4 (25 nM or 50 nM). (G-H) Immunoblotting analyses of MHC-I expression in BT-549 and HCC1143 cells after MYC knockdown (G) and treatment with DMSO or 10058-F4 (25 nM or 50 nM) (H). The data are presented as the mean  $\pm$  SEM (C, D, E and F); n = 3 independent experiments (C, D, E and F); two-tailed unpaired Student's t test (C, D, E and F). \* $P$  < 0.05; \*\* $P$  < 0.01; \*\*\* $P$  < 0.001. ISG, IFN-stimulated gene; IFN $\beta$ , interferon  $\beta$ ; RT-qPCR, quantitative reverse transcription PCR; SEM, standard error of mean.

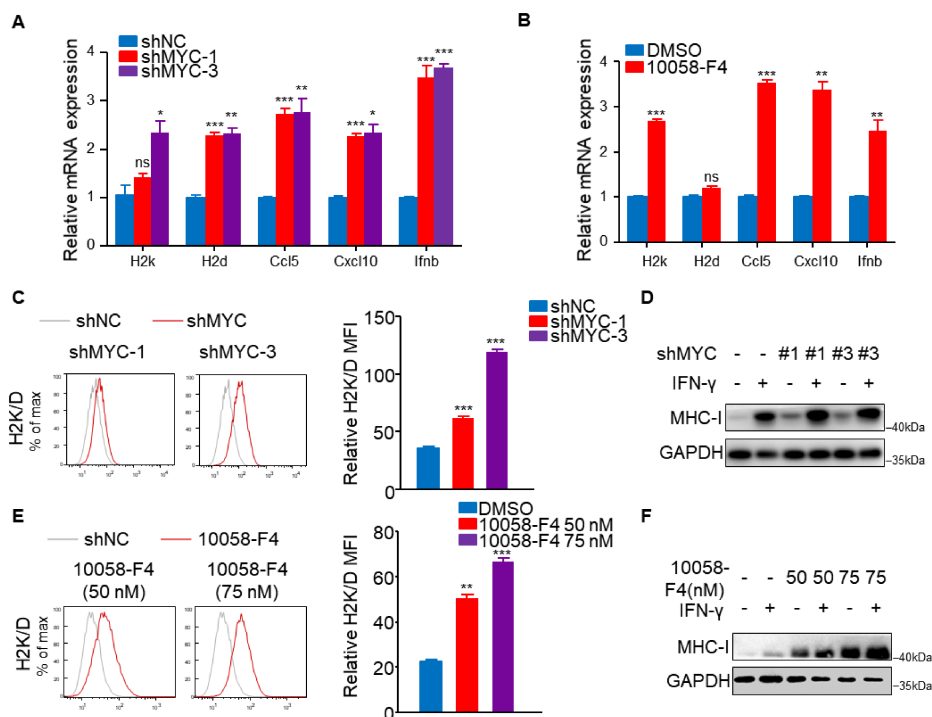

**Supplemental Figure S5. Analyses of interferon downstream gene expressions after MYC knockdown or treatment with 10058-F4 in 66cl4 cells.**

(A-B) RT-qPCR analyses of MHC-I, Ccl5, Cxcl10, and Ifnb mRNA expression in 66cl4 cells with MYC knockdown (A) or after treatment with DMSO or 10058-F4 (75nM) (B). (C-D) Flow cytometry (C) and immunoblotting (D) analyses of MHC-I expression in 66cl4 cells after MYC knockdown with/without IFN- $\gamma$ . (E-F) Flow cytometry (E) and immunoblotting (F) analyses of MHC-I expression in 66cl4 cells with MYC treated with DMSO or 10058-F4 (50 nM or 75 nM) with/without IFN- $\gamma$ . The data are presented as the mean  $\pm$  SEM (A, B, C and E);  $n = 3$  independent experiments (A, B, C and E); two-tailed unpaired Student's  $t$  test (A, B, C and E). \* $P < 0.05$ ; \*\* $P < 0.01$ ; \*\*\* $P < 0.001$ ; ns, not significant. RT-qPCR, quantitative reverse transcription PCR; SEM, standard error of mean.

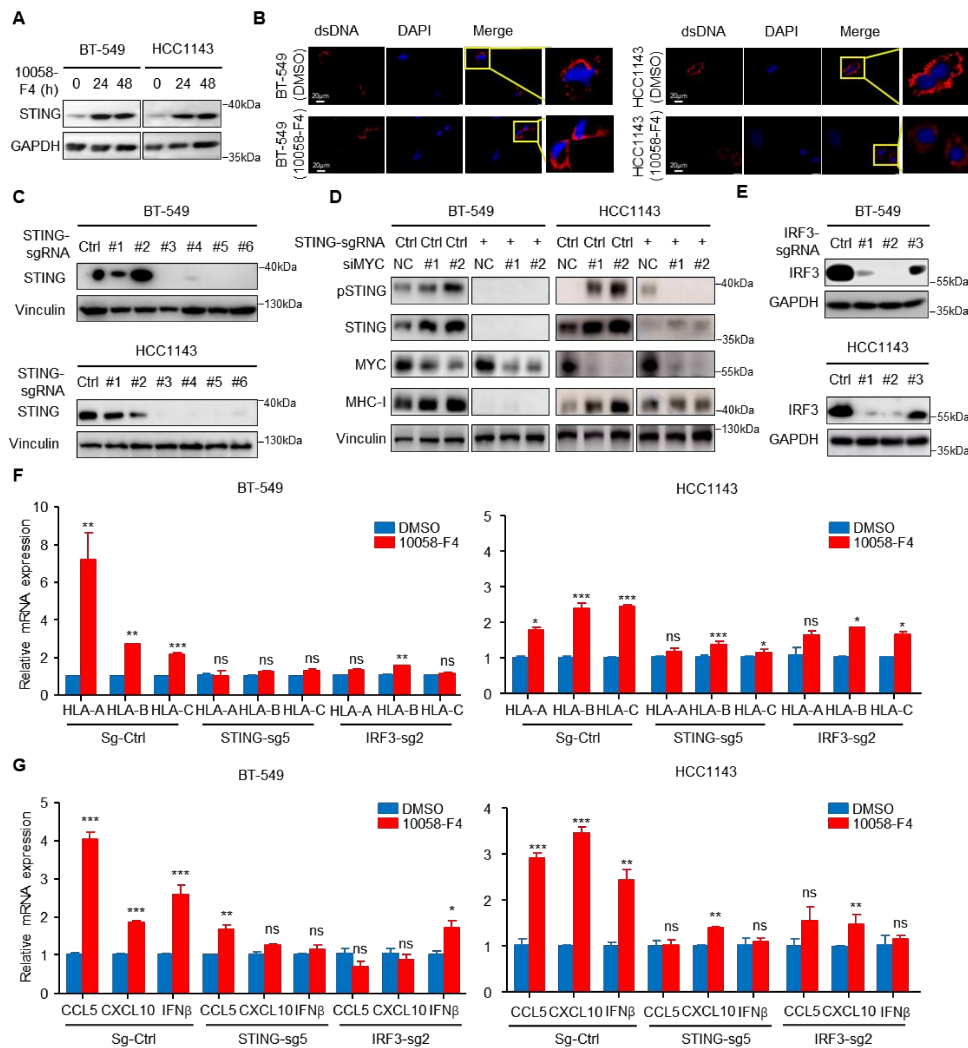

**Supplemental Figure S6. 10058-F4-induced increase in interferon downstream gene expressions is dependent on cGAS-STING pathway.**

(A) Immunoblotting analyses of STING expression in BT-549 and HCC1143 cells after treatment with DMSO or 10058-F4 (24 and 48 h). (B) dsDNA and DAPI staining of BT-549 and HCC1143 cells using immunofluorescence after treatment with DMSO or 10058-F4 (50 nM). (C) Immunoblotting analyses to measure STING knockdown at the protein levels in BT-549 (left) and HCC1143 (right) cells. (D) Immunoblotting analyses to measure STING activation [phospho STING (S366)] in BT-549 and HCC1143 cells transfected with MYC-siRNAs or NC-siRNA in the negative control and STING-knockdown groups. (E) Immunoblotting analyses to measure IRF3 knockdown at the protein levels in BT-549 (left) and HCC1143 (right) cells. (F) RT-qPCR analyses of HLA/A/B/C mRNA expression in BT-549 (left) and HCC1143 (right) cells after treatment with DMSO or 10058-F4 in the negative control, STING- and IRF3-knockdown groups. (G) RT-qPCR analyses of CCL5, CXCL10 and IFN $\beta$  mRNA expression in BT-549 (left) and HCC1143 (right) cells after treatment with DMSO or 10058-F4 in the negative control, STING- and IRF3-knockdown groups. The data are presented as the

mean  $\pm$  SEM (F and G); n = 3 independent experiments (F and G); two-tailed unpaired Student's t test (F and G). \* $P$  < 0.05; \*\* $P$  < 0.01; \*\*\* $P$  < 0.001; ns, not significant. DAPI, 2-(4-Aminophenyl)-6-indolecarbamidine; IFN $\beta$ , interferon  $\beta$ ; RT-qPCR, quantitative reverse transcription PCR; SEM, standard error of mean.



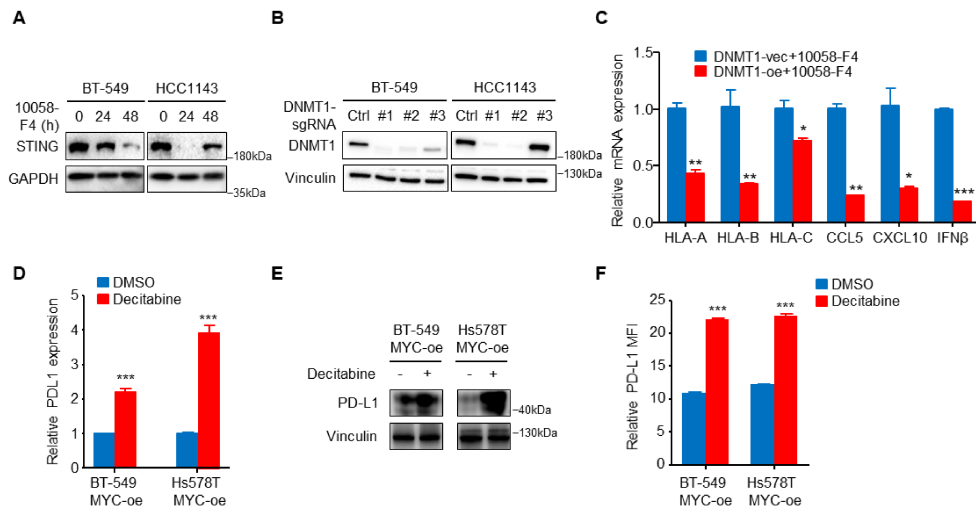

**Supplemental Figure S7. 10058-F4-induced decrease in DNMT1 expression, DNMT1 knockdown verification, and decitabine-induced enhancement in PD-L1 expression, measured by immunoblotting.**

(A) Immunoblotting analyses of DNMT1 expression in BT-549 and HCC1143 cells after treatment with DMSO or 10058-F4 (24 h and 48 h). (B) Effect of DNMT1 overexpression on downstream gene expression in BT-549 cells after treatment with 10058-F4. (C) Immunoblotting analyses to measure DNMT1 knockdown in protein levels in BT-549 (left) and HCC1143 (right) cells. (D-F) RT-qPCR (D), immunoblotting (E) and flow cytometry (F) analyses of PD-L1 expression in MYC-overexpressing BT-549 and Hs578T cells treated with DMSO or decitabine. The data are presented as the mean  $\pm$  SEM (C, D and F);  $n = 3$  independent experiments (C, D and F); two-tailed unpaired Student's *t* test (C, D and F). \* $P < 0.05$ ; \*\* $P < 0.01$ ; \*\*\* $P < 0.001$ . IFN $\beta$ , interferon  $\beta$ ; RT-qPCR, quantitative reverse transcription PCR; SEM, standard error of mean.

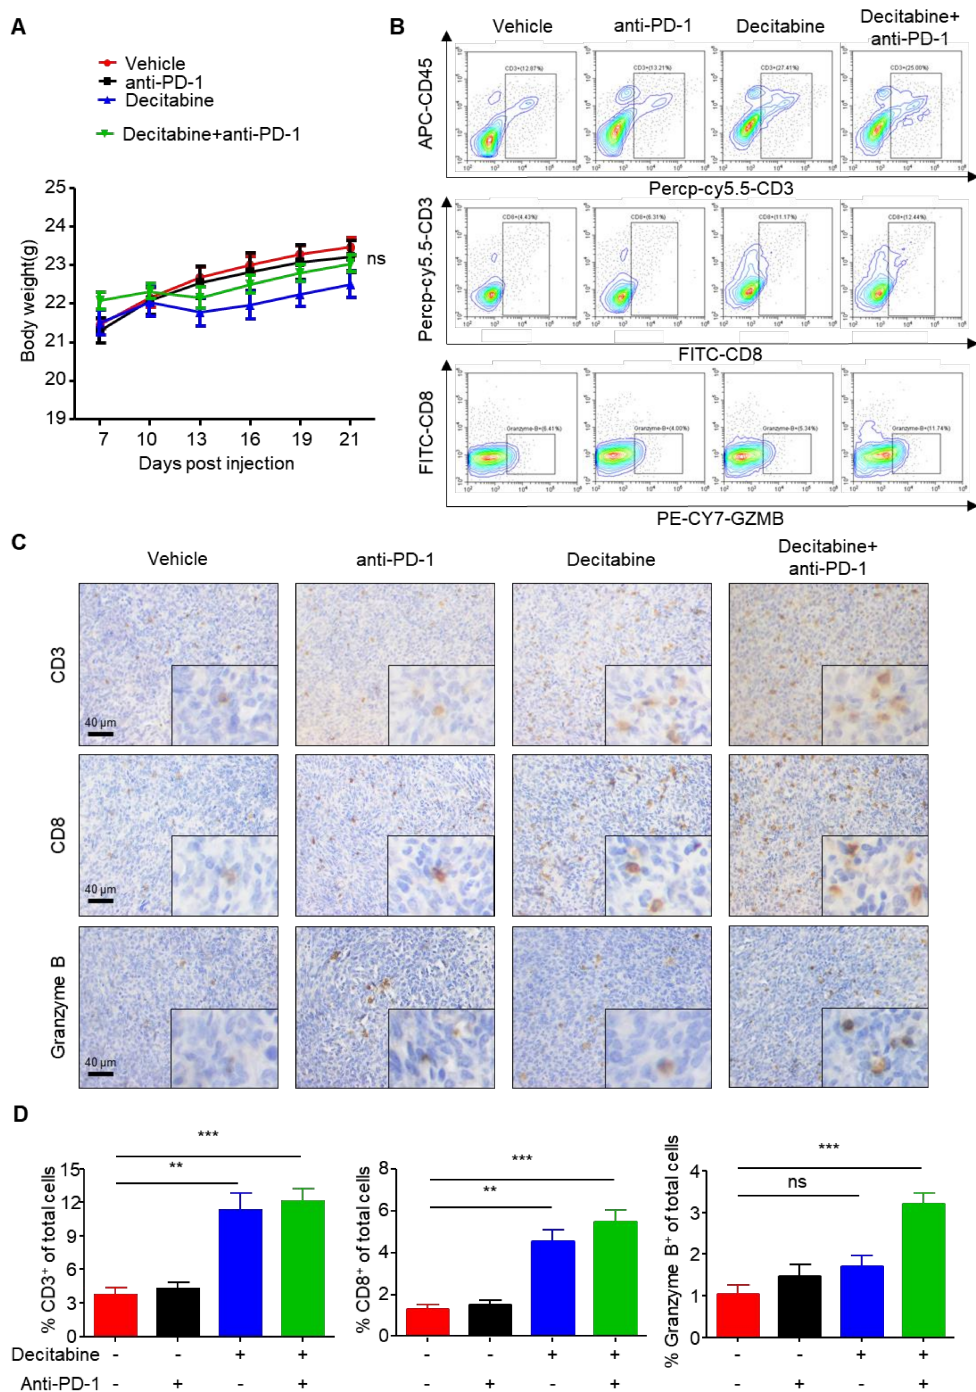

**Supplemental Figure S8. Analyses of drug toxicity, and immune infiltrates of tumors in the four treatment groups.**

(A) Mice body weight changes during the treatment period. (B) Representative flow cytometry analyses of CD3<sup>+</sup>, CD8<sup>+</sup> and CD8<sup>+</sup>Granzyme B<sup>+</sup> cells in the total live cell population in the four treatment groups. (C) Representative images of IHC for CD3, CD8 and Granzyme B in subcutaneous

tumors in the four treatment groups. **(D)** Quantification of CD3<sup>+</sup>, CD8<sup>+</sup> and granzyme B<sup>+</sup> IHC performed on subcutaneous tumors in the four treatment groups. The data are presented as the mean ± SEM (A and D); n = 7 mice/group; two-tailed unpaired Student's t test (A and D). \*\**P* < 0.01; \*\*\**P* < 0.001; ns, not significant. SEM, standard error of mean.

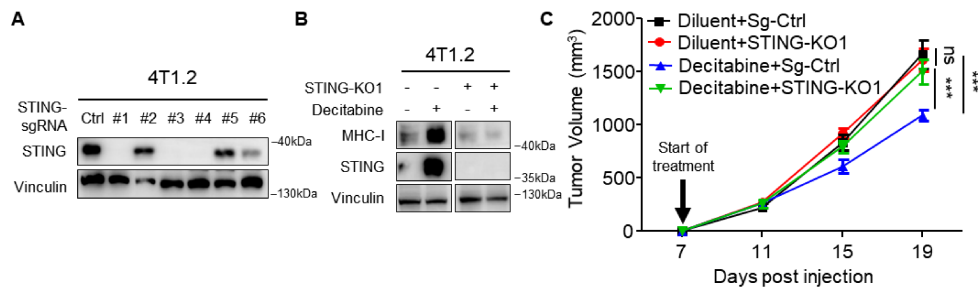

**Supplemental Figure S9. Decitabine's antitumor efficacy is dependent on the tumor-expressed STING.**

(A) Immunoblotting analyses to measure STING knockdown in protein levels in 4T1.2 murine cell line. (B) Immunoblotting analyses to measure STING and downstream MHC-I expression in 4T1.2 cell in the negative control and STING-knockdown groups. (C) Tumor volumes of 4T1.2 negative control (Sg-Ctrl) and STING-knockdown (STING-KO1) subcutaneous tumors in BALB/c mice treated with diluent or decitabine. The data are presented as the mean  $\pm$  SEM (C); one-way ANOVA test after adjusting for multiple comparisons (C). \*\*\* $P < 0.001$ ; ns, not significant. ANOVA, analysis of variance; SEM, standard error of mean.
