# Supplementary material for: MYC suppresses STING-dependent innate immunity by transcriptionally upregulating DNMT1 in triple-negative breast cancer
Source: PubMed Central journal article supplement — J Immunother Cancer. 2021 Jul 28;9(7):e002528. doi: 10.1136/jitc-2021-002528 (PMC8320259; doi:10.1136/jitc-2021-002528), 2021-07-28
Supplement: jitc-2021-002528supp002.pdf [file jitc-2021-002528supp002.pdf]

**Supplemental Table S1. Antibodies Used for Flow Cytometry.**

| Antibody                                   | Company        | Catalog Number | Dilution |
|--------------------------------------------|----------------|----------------|----------|
| Human HLA-A,B,C APC                        | BioLegend      | 311410         | 1:200    |
| Mouse H2K <sup>d</sup> /D <sup>d</sup> APC | BioLegend      | 114713         | 1:200    |
| Human CD8 PE                               | BioLegend      | 301008         | 1:200    |
| Human CD274 (PD-L1) PE                     | BioLegend      | 329706         | 1:200    |
| Fixable Viability Stain 780 APC-CY7        | BD Biosciences | 565388         | 1:200    |
| Mouse CD45 AF700                           | BD Biosciences | 560510         | 1:200    |
| Mouse CD3e Percp-cy5.5                     | BD Biosciences | 566494         | 1:200    |
| Mouse CD8 $\square$ FITC                   | BD Biosciences | 564422         | 1:200    |
| Mouse Granzyme B PE-CY7                    | eBioscience    | 25-8898-82     | 1:200    |

**Supplemental Table S2. qPCR primer sequences for RT-qPCR.**

| Name                 | Forward (5'-3')               | Reverse (5'-3')           |
|----------------------|-------------------------------|---------------------------|
| Human<br>MYC         | TCCCTCCACTCGGAAGGAC           | CTGGTGCATTTTCGGTTGTTG     |
| Human<br>GAPDH       | ACAGTCAGCCGCATCTTCTT          | GACAAGCTTCCCGTTCTCAG      |
| Human<br>OAS2        | GCTCCGACAATCAACAGCCAA<br>G    | CTTGACGATTTTGTGCCGCTCG    |
| Human<br>IFI44       | ATGGCAGTGACAACCTCGTTTG        | TCCTGGTAACTCTCTTCTGCATA   |
| Human<br>IFI44L      | GAGCACAGAAATAGGCTTCTAG<br>C   | TGGTATCAGACCCCACTACGG     |
| Human<br>HLA-A       | TCAGATAGAAAAGGAGGGAGTT<br>ACA | ACAAGCTGTGAGGGACACAT      |
| Human<br>HLA-B       | CCTGAGATGGGAGCCGTCTT          | CTCCGATGACCACAACCTGCT     |
| Human<br>HLA-C       | GGACAAGAGCAGAGATACACG         | CAAGGACAGCTAGGACAACC      |
| Mouse MYC            | CCCTATTTTCATCTGCGACGAG        | GAGAAGGACGTAGCGACCG       |
| Human<br>CCL5        | CCTGCTGCTTTGCCTACATTGC        | ACACACTTGGCGGTTCTTTCGG    |
| Human<br>CXCL10      | GGTGAGAAGAGATGTCTGAATC<br>C   | GTCCATCCTTGAAGCACTGCA     |
| Human IFN<br>$\beta$ | CTTGGATTCTTACAAAGAAGCA<br>GC  | TCCTCCTTCTGGAAGTCTGCA     |
| Mouse                | CGCATCTTCTGTGCAGTGCC          | GGCCTTGAAGTGTGCCGTTGAATTT |

|                 |                              |                          |
|-----------------|------------------------------|--------------------------|
| GAPDH           |                              |                          |
| Mouse H2k       | GGCAATGAGCAGAGTTTCCGAG       | CCACTTCACAGCCAGAGATCAC   |
| Mouse H2d       | TGAGGAACCTGCTCGGCTACTA       | GGTCTTCGTTCCAGGGCGATGTA  |
| Mouse Ccl5      | CCTGCTGCTTTGCCTACCTCTC       | ACACACTTGGCGGTTCCCTTCGA  |
| Mouse<br>Cxcl10 | ATCATCCCTGCGAGCCTATCCT       | GACCTTTTTTGGCTAAACGCTTTC |
| Mouse<br>Ifnb   | GCCTTTGCCATCCAAGAGATGC       | ACACTGTCTGCTGGTGGAGTTC   |
| Human<br>cGAS   | CACGAAGCCAAGACCTCCG          | GTCGCACTTCAGTCTGAGCA     |
| Human<br>STING  | GAGGAGGAGGAGGCTGAGTT         | ACCGCAAGTGAGAGGGAGTA     |
| Human<br>TBK1   | CAACCTGGAAGCGGCAGAGTTA       | ACCTGGAGATAATCTGCTGTCGA  |
| Human IRF3      | AGAGGCTCGTGATGGTCAAG         | AGGTCCACAGTATTCTCCAGG    |
| Human<br>MAVS   | ATGGTGCTCACCAAGGTGTCTG       | TCTCAGAGCTGCTGTCTAGCCA   |
| Human<br>TLR3   | GCGCTAAAAAGTGAAGAACTGG<br>AT | GCTGGACATTGTTCCAGAAAGAGG |
| Human<br>RIG-I  | CACCTCAGTTGCTGATGAAGGC       | GTCAGAAGGAAGCACTTGCTACC  |
| Human<br>MDA5   | GCTGAAGTAGGAGTCAAAGCCC       | CCACTGTGGTAGCGATAAGCAG   |
| Human<br>DNMT1  | CGTGGTGGTGGATGACAAG          | GGCTCCCCGTTGTAGGAGAT     |

|       |                        |                           |
|-------|------------------------|---------------------------|
| Human | CCTACTGGCATTGCTGAACGCA | CAATAGACAATTAGTGCAGCCAGGT |
| PD-L1 | T                      | C                         |
