# Supplementary material for: MYC suppresses STING-dependent innate immunity by transcriptionally upregulating DNMT1 in triple-negative breast cancer
Source: PubMed Central journal article supplement — J Immunother Cancer. 2021 Jul 28;9(7):e002528. doi: 10.1136/jitc-2021-002528 (PMC8320259; doi:10.1136/jitc-2021-002528), 2021-07-28
Supplement: jitc-2021-002528supp003.pdf [file jitc-2021-002528supp003.pdf]

**Supplemental Table S3.** RNA sequencing data of BT-549 shNC vs BT-549 shMYC-3 (FPKM value of each gene)

| GeneID    |                |             | GeneID   | (Continued)    |             |
|-----------|----------------|-------------|----------|----------------|-------------|
|           | BT-549 shMYC-3 | BT549 shNC  |          | BT-549 shMYC-3 | BT549shNC   |
| BBX       | 5.683682955    | 5.069179712 | PTPN18   | 2.223927922    | 1.778286068 |
| WDR83OS   | 111.3034883    | 115.0014416 | AHNAK2   | 14.44850195    | 12.06037263 |
| DHDH      | 0.196117071    | 0.134314677 | PTPN11   | 22.64832601    | 26.4904063  |
| BCR       | 8.874793426    | 8.062902426 | PTPN12   | 24.68221664    | 24.85244825 |
| VOPP1     | 30.11668551    | 26.90003106 | PTPN13   | 3.970000698    | 4.268661249 |
| COL13A1   | 8.297603476    | 7.017464843 | PTPN14   | 2.975232468    | 2.597226838 |
| TARSL2    | 0.545867722    | 0.495202717 | CLEC2D   | 0.187134084    | 0.231343488 |
| GTF2IRD2B | 1.766498425    | 1.683098305 | FOLR1    | 0.1            | 0.1         |
| DHFR      | 5.285843579    | 7.486635082 | FAM65A   | 8.768778432    | 7.823932971 |
| STRN      | 2.559493481    | 2.61588356  | KIFAP3   | 9.070641835    | 9.016693135 |
| BBC3      | 3.003408317    | 2.958042104 | CDON     | 1.770685472    | 1.274618126 |
| BGN       | 0.631416499    | 0.631217601 | MRPS18B  | 24.8225764     | 29.22641666 |
| TMEFF1    | 2.524114292    | 2.78582056  | MRPS18A  | 35.83924424    | 37.82924139 |
| TMEFF2    | 9.31303434     | 6.586910833 | MRPS18C  | 12.93720225    | 16.41349146 |
| STX6      | 8.956494794    | 9.837766918 | CEP57L1  | 4.682883152    | 4.842224552 |
| STX5      | 28.57329603    | 24.591661   | CRYZL1   | 5.352817602    | 6.018589927 |
| STX4      | 32.48521162    | 25.5635278  | FAM64A   | 56.37344123    | 63.933639   |
| STX3      | 1.544205383    | 1.314511696 | AURKAIP1 | 164.9797094    | 186.3576768 |
| BID       | 11.17496456    | 14.95828252 | CDS1     | 0.466337784    | 0.377920152 |
| STX2      | 7.626563071    | 8.567961167 | TWF2     | 88.04951567    | 89.67385112 |
| SPDEF     | 0.1            | 0.1         | TWF1     | 18.26404182    | 21.96773988 |
| MBD3      | 68.05867324    | 72.2102278  | CYP4X1   | 0.1            | 0.1         |
| MBD4      | 12.88166338    | 14.00680758 | CDR2     | 12.21299204    | 11.49458102 |
| MBD5      | 1.627057433    | 1.358092763 | CDR1     | 0.979852266    | 0.756786622 |
| GATSL3    | 2.726390081    | 1.838074371 | CDT1     | 18.35577583    | 20.0268474  |
| MBD6      | 13.28707449    | 13.55978461 | CDSN     | 0.110068077    | 0.114377584 |
| BIK       | 0.1            | 0.177847148 | GADD45B  | 13.62622339    | 14.47904769 |
| MBD1      | 14.87264839    | 15.27902383 | GADD45A  | 29.91551548    | 29.90973209 |
| MBD2      | 9.82334039     | 11.23968984 | CDS2     | 7.619410241    | 6.844032569 |
| PRKRIR    | 9.936542725    | 11.35616077 | FAM69B   | 0.700978782    | 1.387329674 |
| FBXO27    | 1.508317749    | 1.440752994 | FAM69A   | 1.238765708    | 1.880407825 |
| FBXO28    | 8.286781677    | 9.763128961 | VLDLR    | 6.908873086    | 6.144226532 |
| FBXO25    | 9.864797761    | 9.031764828 | PP2D1    | 1.715311767    | 2.559375444 |
| FBXO24    | 0.307436332    | 0.165828156 | CDV3     | 47.39707632    | 48.16244357 |
| FBXO21    | 4.26052041     | 5.585695258 | PTCHD1   | 0.640034064    | 0.780048029 |
| FBXO22    | 6.275087186    | 5.92558395  | CTNNA1   | 119.7813794    | 101.2897076 |
| FADS3     | 5.952848828    | 5.644471018 | EBLN2    | 0.378476172    | 0.365116137 |
| FADS2     | 262.269845     | 269.082414  | CILP2    | 0.755731765    | 0.59470667  |
| FNTA      | 48.27913585    | 51.31797797 | GDF11    | 4.01031117     | 4.40858624  |
| FNTB      | 2.495766586    | 2.731725163 | DMRT2    | 0.117700605    | 0.1         |
| FADS1     | 55.01320498    | 55.03629226 | GDF15    | 158.6379802    | 97.68856884 |
| FBXO18    | 17.61550855    | 17.11882514 | CTNNB1   | 102.3873441    | 101.8280912 |
| STX8      | 18.07900598    | 19.18356896 | SERHL2   | 0.173864375    | 0.240641388 |
| FBXO16    | 0.909930821    | 0.871073981 | SLX1B    | 0.588430809    | 0.480452986 |

|           |             |             |                  |             |             |
|-----------|-------------|-------------|------------------|-------------|-------------|
| FBXO17    | 10.1017929  | 9.520993644 | APLP2            | 272.0946448 | 235.4319294 |
| STX7      | 10.62408772 | 9.951237574 | APLP1            | 25.37588659 | 20.25197354 |
| FBXO15    | 0.783178599 | 0.672637214 | CDYL             | 18.45781905 | 16.44458348 |
| FBXO10    | 9.547751354 | 10.05664176 | PHOSPHO1         | 0.165347518 | 0.123329664 |
| FBXO11    | 6.960867055 | 6.301987572 | PHOSPHO2         | 1.755817593 | 1.34139839  |
| MINPP1    | 9.012593944 | 9.319123109 | SLX1A            | 0.322014004 | 0.226817662 |
| LOC642441 | 0.130487839 | 0.143537754 | ZFP36L2          | 32.41304717 | 24.24686582 |
| BLM       | 2.333871897 | 3.085762158 | ZFP36L1          | 53.2188722  | 41.70756123 |
| IREB2     | 3.910467465 | 4.265592715 | EP400            | 2.00646888  | 1.804578879 |
| FBXO48    | 1.15087173  | 0.768486261 | GNB2L1           | 1655.982542 | 2091.689179 |
| FBXO45    | 5.01149348  | 5.547983241 | B4GALT2          | 61.0083937  | 54.89973007 |
| FBXO46    | 9.969005124 | 10.12410912 | B4GALT3          | 17.69674723 | 20.68227026 |
| FBXO43    | 1.201385687 | 1.639590653 | B4GALT1          | 67.4176704  | 57.17678201 |
| FBXO44    | 6.359189997 | 5.742335518 | PKD2             | 6.175813846 | 5.803985781 |
| FBXO41    | 1.624099522 | 1.40797483  | PKD1             | 8.394833701 | 6.963306666 |
| FBXO42    | 6.555784908 | 6.112981275 | CKS1B            | 80.7256831  | 103.3936034 |
| MBIP      | 5.742766128 | 7.640379653 | CYP4V2           | 0.899250415 | 0.763222098 |
| BMF       | 2.435455207 | 1.425648565 | KLF10            | 22.49471688 | 23.45896065 |
| HTR1F     | 0.908533231 | 0.927186981 | KLF11            | 7.931980263 | 6.998245631 |
| FBXO38    | 8.540758122 | 8.715798851 | LOC10192862<br>1 | 1.888339999 | 1.05768071  |
| HTR1D     | 0.356549516 | 0.427109049 | KLF12            | 1.958579522 | 1.895040753 |
| STYX      | 2.716251358 | 2.87539085  | KLF13            | 4.207846416 | 4.232477654 |
| FBXO36    | 0.982711963 | 1.006016802 | KLF14            | 3.188994847 | 2.581298954 |
| HTR1B     | 12.63385455 | 9.871608992 | KLF16            | 28.15404946 | 35.48529049 |
| FBXO34    | 9.168240788 | 9.207655919 | KLF17            | 0.44844357  | 0.633132379 |
| FBXO32    | 40.35784219 | 23.30774418 | B4GALT6          | 0.887794603 | 0.978424376 |
| FBXO33    | 2.975531936 | 3.111334523 | B4GALT7          | 14.11859855 | 10.36929997 |
| FBXO30    | 5.70998363  | 6.259920517 | B4GALT4          | 5.531846291 | 4.32553561  |
| FAM90A1   | 0.1         | 0.1         | FAM60A           | 5.465127373 | 9.699270862 |
| FBXO31    | 6.052206608 | 5.555389933 | B4GALT5          | 19.48283684 | 16.08940581 |
| PPWD1     | 12.57391273 | 14.52736229 | ZNF197           | 3.45584436  | 3.715074039 |
| HTR2A     | 0.453215224 | 0.399916081 | TM2D2            | 26.85326678 | 22.34019905 |
| BOC       | 3.025259954 | 2.0611358   | ZNF195           | 1.79058685  | 1.774729285 |
| SPDL1     | 27.73075788 | 34.87230495 | TM2D1            | 10.24088927 | 13.33519849 |
| BOK       | 10.14875475 | 9.88153683  | TM2D3            | 11.08771225 | 10.59326049 |
| SLC36A1   | 5.85936554  | 4.713478488 | IWS1             | 14.37771989 | 13.7370282  |
| VPS13C    | 1.537949842 | 1.337658189 | RMND5B           | 24.27485823 | 20.28514456 |
| VPS13D    | 2.40314889  | 2.289625632 | RMND5A           | 3.418899305 | 4.19157712  |
| DHPS      | 47.9781739  | 51.24166106 | FAM63B           | 0.773615201 | 0.965752532 |
| VPS13A    | 1.716317494 | 1.70619435  | FAM63A           | 2.174474399 | 2.028130497 |
| VPS13B    | 3.32989007  | 2.773952375 | LEKR1            | 0.329712419 | 0.402140055 |
| RABGGTB   | 28.76591819 | 41.8173712  | ZNF189           | 3.8254638   | 3.988631823 |
| RABGGTA   | 7.916480836 | 8.366515009 | ZNF185           | 1.624943685 | 1.377133066 |
| C1D       | 3.660523656 | 5.184558603 | ZNF184           | 2.785788891 | 2.341036189 |
| C1S       | 21.57541225 | 13.74474131 | ZNF182           | 2.723510657 | 2.549614747 |
| C1R       | 55.26839561 | 30.88089618 | ZNF181           | 2.069077476 | 1.746703639 |
| SLC36A4   | 5.191413714 | 5.650966626 | ZNF180           | 2.196946642 | 1.97568638  |
| GPKOW     | 27.80139683 | 26.44408136 | LOC10192864<br>1 | 2.104748614 | 1.750971411 |

|              |             |             |          |             |             |
|--------------|-------------|-------------|----------|-------------|-------------|
| BRE          | 19.36372376 | 16.72256378 | PIK3IP1  | 0.331081297 | 0.369993931 |
| IL2RB        | 0.1         | 0.11834075  | LURAP1L  | 20.03075013 | 17.90244183 |
| LGALS1       | 0.642997408 | 0.671872434 | FAM19A4  | 0.167939769 | 0.116170081 |
| PEX26        | 10.26570677 | 10.40829189 | FAM19A3  | 2.939663353 | 1.607681596 |
| LGALS3       | 203.7086346 | 146.1061275 | GSTK1    | 35.65230129 | 38.4649288  |
| LGALS2       | 0.1         | 0.521524616 | ORAI3    | 6.866962495 | 4.931735539 |
| LGALS1       | 3439.032469 | 3308.593829 | AGTR1    | 4.920665303 | 3.311549598 |
| MCIDAS       | 0.89013349  | 0.999145663 | ORAI2    | 6.385475005 | 5.109479476 |
| BSG          | 496.2745045 | 505.898853  | ORAI1    | 25.26227739 | 25.85091349 |
| LGALS9       | 1.719796051 | 0.604682533 | SHMT2    | 74.15867231 | 77.65623713 |
| LGALS8       | 0.645897832 | 0.389382924 | SHMT1    | 13.78919133 | 15.74177593 |
| BTC          | 0.374874481 | 0.492530859 | RDH11    | 26.58139469 | 26.30281053 |
| BTD          | 5.82355526  | 5.570490063 | RDH10    | 5.225649583 | 4.911103057 |
| CFDP1        | 13.74787261 | 17.06644817 | RDH14    | 4.38598035  | 5.362734826 |
| CRISPLD1     | 4.660287653 | 3.69031084  | RDH13    | 1.594268688 | 2.252991294 |
| CRISPLD2     | 13.27014206 | 10.08571278 | GSTM4    | 1.958004997 | 2.050955444 |
| SUB1         | 41.08921682 | 52.52049831 | GSTM3    | 8.685115313 | 8.000598999 |
| DHX8         | 10.16060347 | 9.809323053 | GSTM2    | 3.474372523 | 2.98621726  |
| DHX9         | 60.61162007 | 70.70830476 | NEBL     | 1.003687568 | 1.040988891 |
| RACGAP1      | 51.61392407 | 58.86402934 | PKIB     | 0.204110776 | 0.304426767 |
| SLC10A4      | 0.51698381  | 0.607899348 | PKIA     | 2.313586903 | 3.252253588 |
| BBS2         | 4.586197692 | 4.30506006  | PKIG     | 62.71783477 | 59.79017958 |
| BBS1         | 2.58194528  | 1.740068475 | GTF2H2C  | 5.823027663 | 7.198266367 |
| XBP1         | 82.50842672 | 56.98451527 | KCNC3    | 0.1         | 0.1         |
| SLC10A7      | 1.808572316 | 1.767903155 | KCNC4    | 0.334172986 | 0.409327056 |
| SPDYC        | 0.1         | 0.1         | KCND1    | 0.529258433 | 0.406498407 |
| SLC10A3      | 69.02379042 | 59.9209945  | GSTO2    | 0.21633596  | 0.224599019 |
| SUCO         | 6.4402336   | 5.35437986  | GSTO1    | 64.9285093  | 68.35747702 |
| MC1R         | 11.60002453 | 11.01638579 | PKN3     | 8.227258919 | 8.886539638 |
| C8G          | 0.305178819 | 0.217201157 | GSTP1    | 164.3593089 | 179.6853264 |
| SUFU         | 4.614763359 | 4.358182374 | PTAFR    | 0.244375943 | 0.254630614 |
| BBS9         | 4.818142845 | 3.26578726  | ADAM22   | 0.582706406 | 0.699240569 |
| BBS7         | 4.726259197 | 4.910814717 | KIAA2022 | 0.104433838 | 0.1         |
| BBS5         | 1.515207418 | 1.239732062 | KCNA7    | 0.1         | 0.108484484 |
| BBS4         | 4.202875663 | 4.11160673  | SDAD1    | 13.49394761 | 14.90689275 |
| ZHX2         | 0.561579795 | 0.429576454 | KIAA2018 | 0.513093755 | 0.587084178 |
| PCYT1A       | 27.99550564 | 28.8286467  | PKLR     | 0.213963942 | 0.320867802 |
| ZHX3         | 4.602918353 | 4.407452089 | KCNB1    | 1.516144936 | 0.868476661 |
| CACYBP       | 29.72580991 | 43.08559257 | ADAM32   | 0.423862013 | 0.426461308 |
| ZHX1         | 15.58249939 | 17.23135688 | KIAA2013 | 81.95592631 | 78.23032663 |
| RNF144A      | 5.557599306 | 5.541339359 | PKN2     | 8.313136022 | 8.972457833 |
| RNF144B      | 0.1         | 0.128677361 | MITD1    | 9.441239225 | 9.837218621 |
| TAX1BP1      | 30.95816538 | 28.1810278  | PKN1     | 57.83676009 | 52.39313946 |
| TAX1BP3      | 99.41972258 | 79.30395713 | KCNG1    | 0.300584081 | 0.271864863 |
| LOC102724905 | 1.010095363 | 1.453801685 | KCNG2    | 0.137081568 | 0.179430763 |
| PEX16        | 11.83532514 | 12.15365987 | KCNG3    | 0.629837814 | 0.720822865 |
| PEX19        | 17.31797569 | 16.94352163 | RASL11B  | 0.179639157 | 0.270591464 |
| PEX10        | 34.24155763 | 30.82699011 | RASL11A  | 1.446760259 | 2.263626024 |
| PEX12        | 1.532871598 | 1.994111355 | GOLIM4   | 11.2024423  | 9.773761315 |

|                    |             |             |                  |             |             |
|--------------------|-------------|-------------|------------------|-------------|-------------|
| PEX13              | 3.747520443 | 4.363980564 | PTAR1            | 1.820342081 | 2.018851743 |
| PEX14              | 21.47469037 | 23.22753681 | POFUT2           | 9.977528714 | 7.521909674 |
| INPPL1             | 35.23813909 | 31.1301394  | LOC10272368<br>7 | 0.853645217 | 0.781614272 |
| IGF1R              | 2.307139395 | 1.782289726 | POFUT1           | 27.74297685 | 29.66019106 |
| PPIP5K1            | 1.184649693 | 1.341594294 | NEK1             | 1.243495267 | 1.230003653 |
| PPIP5K2            | 11.36373563 | 13.09038293 | NEK2             | 21.72414329 | 26.44499343 |
| ENPP2              | 2.237090115 | 2.822507609 | NEK3             | 6.962301182 | 6.121082046 |
| ENPP1              | 4.742246599 | 4.521193953 | KCNH1            | 1.439479014 | 1.028955802 |
| LOC10192784<br>8   | 0.601598536 | 0.432568386 | PIAS4            | 17.47690957 | 17.88896973 |
| ENPP4              | 3.374706561 | 2.929619086 | KCNH2            | 0.112109855 | 0.1         |
| ENPP5              | 0.1         | 0.119194911 | PIAS3            | 29.94244615 | 29.89548634 |
| DHDDS              | 35.05211765 | 29.62594571 | KCNH3            | 0.335666075 | 0.45523647  |
| HTRA1              | 91.72538897 | 87.46376024 | DGAT2            | 4.947939049 | 4.453349575 |
| HTRA2              | 9.9605561   | 10.31180575 | DGAT1            | 16.30946858 | 16.18975657 |
| DAPP1              | 0.117682531 | 0.1         | PIAS2            | 3.170186497 | 3.534398981 |
| CHCHD10            | 4.914355912 | 9.693857637 | PIAS1            | 7.732827247 | 6.829998132 |
| IGF2R              | 43.10795408 | 31.21242075 | LENG1            | 12.53328314 | 11.77007475 |
| BSPRY              | 0.122125757 | 0.1         | DMTF1            | 6.654646704 | 7.215792519 |
| ZIC2               | 12.65561954 | 13.79055276 | PKP2             | 0.275550609 | 0.283841328 |
| CA2                | 0.411832395 | 0.322654059 | PKP1             | 0.109537594 | 0.120430053 |
| ZIC1               | 1.281839411 | 1.837348636 | PKP4             | 8.666133015 | 10.34513237 |
| CA4                | 4.549334488 | 4.093825396 | PKP3             | 3.318057029 | 3.493805876 |
| CA7                | 0.1         | 0.426724893 | KCNE2            | 0.488178906 | 0.561944784 |
| CA6                | 0.251904319 | 0.316924948 | ZC4H2            | 3.436942147 | 4.405680847 |
| CA8                | 0.1         | 0.116283655 | NPAS1            | 0.532291585 | 0.354193992 |
| TMEM189-<br>UBE2V1 | 38.92992977 | 42.58413412 | NPAS2            | 1.02681869  | 0.823530358 |
| SUN2               | 59.49114981 | 57.06473698 | LOC10050571<br>0 | 0.1         | 0.1         |
| SUN1               | 49.49758426 | 49.1536919  | NEK8             | 0.572614836 | 0.619162578 |
| ATP6AP1            | 309.3337915 | 265.023002  | KCNF1            | 2.097253112 | 1.866388865 |
| CAD                | 15.82132763 | 15.33845881 | NEK9             | 9.351981329 | 8.774656598 |
| ATP6AP2            | 58.42723144 | 55.13120775 | SDF2L1           | 40.93584357 | 38.08544477 |
| HUNK               | 0.142208214 | 0.110045813 | NEK4             | 5.21704741  | 5.237034285 |
| CAT                | 21.01603586 | 18.5180599  | RASL10A          | 0.204599887 | 0.373849549 |
| SHANK3             | 0.924272988 | 0.930270329 | RASL10B          | 4.930785617 | 5.488758017 |
| SHANK2             | 0.1         | 0.103485966 | NEK6             | 19.58172887 | 19.72016432 |
| CBL                | 3.20847281  | 3.065947932 | NEK7             | 39.64781535 | 33.94595907 |
| CBS                | 4.071564804 | 3.952637336 | C6orf15          | 0.115243919 | 0.110884438 |
| TBX20              | 0.925979733 | 1.299866121 | DRAP1            | 229.2025468 | 221.4469797 |
| ZIC4               | 0.622184411 | 0.611583872 | MNAT1            | 17.41709233 | 20.26978522 |
| ZIC5               | 2.642753387 | 3.343823102 | BCAR3            | 85.58903492 | 79.65328624 |
| SUOX               | 8.814816162 | 7.060806163 | KCNK5            | 0.1         | 0.109805489 |
| TBX19              | 1.517522441 | 1.493331543 | KCNK6            | 1.174180539 | 0.908820165 |
| TBX18              | 12.14605252 | 10.37608658 | KCNK7            | 0.332667267 | 0.289861375 |
| TBX15              | 4.591834719 | 1.978533613 | PIWIL4           | 0.327357886 | 0.227551056 |
| CCS                | 8.683961975 | 7.594357771 | ALAS1            | 53.97932192 | 53.35100528 |
| CD6                | 0.1         | 0.1         | NENF             | 38.20125266 | 40.12573884 |

|                    |             |             |                  |             |             |
|--------------------|-------------|-------------|------------------|-------------|-------------|
| CD7                | 0.990824703 | 0.475856711 | BCAS2            | 40.73673506 | 44.02131332 |
| CD9                | 105.1365518 | 90.35572356 | BCAS4            | 4.020851092 | 3.168748145 |
| CDA                | 0.262347741 | 0.138639756 | BCAS3            | 2.564534972 | 2.04969337  |
| CLEC11A            | 4.7892766   | 5.6100787   | PIANP            | 0.17586897  | 0.235429595 |
| HUS1               | 4.74926907  | 4.968839843 | LOC10272365<br>1 | 0.571748259 | 0.478941539 |
| CEL                | 0.339507144 | 0.286559092 | NEMF             | 7.597872296 | 8.832115718 |
| NUP93              | 11.17479355 | 11.48046558 | BCAT1            | 2.275379154 | 2.650415685 |
| BCAM               | 0.433118069 | 0.337852421 | BCAT2            | 9.366309499 | 12.54794615 |
| HECW2              | 0.932600598 | 0.673068984 | LENG9            | 3.960785903 | 3.620802213 |
| HECW1              | 1.295848159 | 1.148407377 | LENG8            | 11.63527724 | 12.74191608 |
| SRFBP1             | 5.394047618 | 5.685052523 | U2AF1            | 2.391968102 | 4.391285891 |
| NUP98              | 21.88146153 | 21.15861195 | DRAM1            | 19.44059676 | 18.30681766 |
| CFB                | 11.10528574 | 6.207052482 | LOC10272366<br>5 | 0.248009336 | 0.117613564 |
| CFD                | 5.81331179  | 4.875122841 | U2AF2            | 165.6438807 | 197.7144017 |
| CFH                | 14.08542978 | 9.267930579 | DRAM2            | 15.18019651 | 19.28416238 |
| RRP7A              | 7.156992894 | 7.59363357  | KCNJ4            | 0.452212047 | 0.261669489 |
| NUP85              | 23.52415864 | 28.41419694 | COL26A1          | 0.1         | 0.11223019  |
| NUP88              | 28.77210757 | 34.41396214 | GSTZ1            | 5.823754726 | 4.551299941 |
| C3orf18            | 0.542220344 | 0.511852326 | KCNK1            | 0.124040387 | 0.1         |
| C3orf17            | 6.485610944 | 7.439405743 | KCNK2            | 7.307030084 | 5.905953727 |
| MCAM               | 9.961510573 | 6.022681891 | KCNK3            | 36.22298444 | 34.6484881  |
| CGN                | 0.751682032 | 0.812510444 | BCAR1            | 191.1151721 | 143.5552418 |
| C3orf14            | 3.666584121 | 4.50920727  | SLC23A3          | 0.207426131 | 0.268749308 |
| MCAT               | 9.561743014 | 11.61198261 | SLC23A2          | 5.972688161 | 6.307225451 |
| ZNF559-<br>ZNF177  | 1.013991502 | 0.817867396 | CERK             | 8.094302239 | 13.10173474 |
| MOCS2              | 7.903253274 | 9.211626085 | CCP110           | 3.680274652 | 4.101003925 |
| MOCS3              | 6.112721565 | 5.366155395 | ATXN7L1          | 1.202586403 | 0.991464044 |
| TMEM110-<br>MUSTN1 | 4.728969162 | 4.142475957 | ATXN7L2          | 2.228473162 | 3.257578187 |
| STON1              | 0.920817264 | 0.870462887 | ATXN7L3          | 20.2062724  | 20.19107501 |
| CHM                | 7.488880628 | 7.202558095 | LIMCH1           | 0.106627284 | 0.128392014 |
| STON2              | 0.730223341 | 0.601582374 | GOLPH3L          | 9.569516901 | 10.19532179 |
| MCEE               | 2.428850347 | 2.87140322  | SOAT1            | 19.16055807 | 16.95660072 |
| RRP12              | 20.94624218 | 23.16442506 | LOC10272361<br>0 | 0.735489627 | 0.553751268 |
| CIC                | 31.20148533 | 29.52665697 | NINJ2            | 0.332340237 | 0.630864632 |
| RRP15              | 2.346252614 | 3.312504676 | KCNQ1            | 0.1         | 0.1         |
| ZIK1               | 2.899073944 | 2.770315562 | NINJ1            | 21.1887307  | 19.73297788 |
| CIT                | 5.326150509 | 5.331010113 | KCNQ4            | 0.302786151 | 0.253842602 |
| PLIN3              | 113.2161351 | 103.4246902 | KCNQ5            | 3.589498423 | 3.75913838  |
| PLIN2              | 112.0255348 | 107.3866541 | CES3             | 0.1         | 0.1         |
| PLIN1              | 0.1         | 0.112506462 | CES2             | 9.207937341 | 8.64381297  |
| RCCD1              | 5.094231903 | 5.060188466 | GRB7             | 0.926810774 | 0.739554589 |
| MOCS1              | 1.360408113 | 1.240536457 | RRAD             | 0.135197342 | 0.150263098 |
| TRBV12-4           | 0.797332577 | 0.597908271 | ZBTB1            | 7.743232301 | 7.556656857 |
| RASSF10            | 0.119355915 | 0.113820479 | ZBTB5            | 7.930612186 | 7.552678277 |
| MINOS1             | 11.88627408 | 13.48082979 | ZBTB4            | 27.29092417 | 22.38022199 |

|                  |             |             |         |             |             |
|------------------|-------------|-------------|---------|-------------|-------------|
| RRP36            | 58.59561385 | 66.12697568 | ZBTB3   | 0.624054576 | 0.648804073 |
| CKB              | 83.19353766 | 68.36038947 | ZBTB2   | 9.079783239 | 8.707310273 |
| PAIP2            | 75.40363316 | 86.21233164 | NEU3    | 2.217373734 | 2.759225159 |
| PAIP1            | 35.75611606 | 35.50927379 | RRAS    | 111.5600642 | 83.00527272 |
| HIPK4            | 0.142374614 | 0.1         | NEU1    | 50.71340408 | 39.00320084 |
| MOCOS            | 0.442912719 | 0.2496281   | FAM192A | 17.41165866 | 18.90896534 |
| RRP1B            | 13.72355091 | 17.1631706  | KCNN4   | 17.26607117 | 17.95216654 |
| HIPK1            | 7.031029931 | 6.894609373 | NTNG1   | 2.214152395 | 1.538921725 |
| HIPK3            | 5.354032443 | 4.446103922 | NTNG2   | 2.076060842 | 1.021664865 |
| HIPK2            | 3.229019441 | 3.147934442 | YES1    | 11.52151874 | 10.67797353 |
| FOSB             | 0.801672438 | 0.610830678 | NET1    | 36.71947333 | 34.3157703  |
| CLU              | 129.5358694 | 100.1613584 | ZBTB9   | 8.183863895 | 9.195730275 |
| OIP5             | 6.278671291 | 8.233106014 | ZBTB6   | 2.327930007 | 2.305403642 |
| DIO2             | 0.475040606 | 0.210607212 | GRB2    | 23.34674156 | 24.73960054 |
| DIO3             | 8.132428647 | 4.123534675 | TFB1M   | 2.489738316 | 3.279291616 |
| FAM91A1          | 23.13960124 | 23.92635045 | FAM194A | 0.3783556   | 0.33488756  |
| CNP              | 39.73140272 | 24.66693634 | EIF5AL1 | 2.846382611 | 2.428045325 |
| LOC10050692<br>2 | 2.942065032 | 2.129286645 | FCER1G  | 0.53952011  | 0.47659052  |
| MCL1             | 58.30832184 | 51.48699789 | AGTRAP  | 47.54612718 | 29.22471641 |
| TCEANC           | 0.619339657 | 0.446096852 | TFB2M   | 9.815412379 | 12.04241072 |
| BCL9             | 2.791862105 | 3.060177342 | PITPNM1 | 24.2562374  | 19.27029317 |
| UBOX5            | 4.129362564 | 3.660015488 | PITPNM3 | 3.478177009 | 2.911500219 |
| BCL6             | 12.40523949 | 10.5026929  | PITPNM2 | 1.685799812 | 1.575793967 |
| CPD              | 5.632354277 | 5.276693322 | FAM193B | 3.389909537 | 3.245482319 |
| BCL3             | 30.04504756 | 28.76933666 | FAM32A  | 65.89060956 | 61.82121094 |
| BCL2             | 0.87622826  | 0.779945437 | FAM193A | 5.981276639 | 5.093029176 |
| CPE              | 4.700298414 | 4.331912698 | SSNA1   | 98.70252994 | 103.2225704 |
| OSCP1            | 3.383293344 | 2.395491521 | FAM35A  | 8.76743584  | 9.297372825 |
| CPM              | 7.110968553 | 6.557688848 | NEXN    | 1.382633659 | 1.490207649 |
| MCM7             | 121.6845121 | 141.1299757 | FAM196B | 1.549598766 | 1.040945591 |
| CPQ              | 10.67597992 | 9.401168778 | KLHL2   | 4.438933557 | 4.167705822 |
| MCM8             | 5.884405546 | 6.899791088 | KCNRG   | 0.579550249 | 0.510889225 |
| MCM9             | 1.242023094 | 1.276982046 | KLHL9   | 13.48816907 | 12.57682289 |
| CEP170B          | 8.584213018 | 7.336266869 | ETAA1   | 2.110618043 | 2.982279658 |
| GGPS1            | 16.54447802 | 16.63309891 | TFAP4   | 2.916050528 | 3.96542012  |
| DIS3             | 10.03569889 | 10.79778887 | FAM195B | 64.94813095 | 59.33519766 |
| SAPCD2           | 9.899314702 | 15.69058224 | KLHL5   | 8.103377601 | 7.491918577 |
| MCM3             | 60.13222685 | 72.05666961 | KCNS1   | 0.695167747 | 0.377858923 |
| ST20-MTHFS       | 0.987861438 | 1.189092521 | KCNS2   | 0.88714056  | 0.978176283 |
| MCM4             | 86.75879474 | 103.7976055 | FAM195A | 15.74247241 | 17.62801259 |
| MCM5             | 55.76499748 | 56.83396822 | KCNS3   | 1.41987834  | 0.717978612 |
| MCM6             | 21.14390253 | 23.13815127 | KLHL7   | 6.163200558 | 6.762800699 |
| CRK              | 43.49743881 | 48.10962779 | KLHL8   | 2.107231823 | 2.113830302 |
| MCM2             | 52.36236247 | 61.01397291 | PLAT    | 11.83938405 | 6.42459625  |
| STOX2            | 0.1         | 0.104028909 | TXN2    | 87.04560913 | 99.68208562 |
| CSK              | 10.66089828 | 10.64611513 | PLAU    | 90.26853255 | 83.53749733 |
| BCO2             | 0.207042466 | 0.240122194 | FAM198B | 4.931178888 | 3.158601427 |
| STOX1            | 0.528640899 | 0.416259393 | CARD10  | 15.56946206 | 15.49327029 |
| SLC35A2          | 31.33226973 | 26.79188058 | ADAM11  | 1.469002301 | 1.372425964 |

|              |             |             |           |             |             |
|--------------|-------------|-------------|-----------|-------------|-------------|
| SLC35A1      | 9.312765802 | 9.227578141 | ADAM10    | 19.15086557 | 16.43646532 |
| SLC35A4      | 116.7704064 | 114.6633149 | ADAM19    | 18.40110845 | 16.172813   |
| SLC35A3      | 2.585664708 | 2.658000562 | ADAM17    | 13.74230062 | 10.51585909 |
| KBTBD11      | 0.161435361 | 0.187731953 | BRMS1     | 47.49605018 | 47.82937596 |
| CPPED1       | 0.133827952 | 0.220768895 | ADAM15    | 41.87062327 | 37.72866425 |
| ASXL1        | 28.70625366 | 26.43965136 | ADAM12    | 31.41814569 | 23.05250571 |
| CTH          | 0.804012632 | 1.070688461 | PLAA      | 21.71315742 | 20.48157455 |
| ASXL2        | 1.587067187 | 1.692689936 | CARD14    | 0.187083079 | 0.135530811 |
| BCOR         | 5.809685467 | 5.820611687 | PLD6      | 9.595169366 | 9.211605428 |
| SLC35B3      | 10.17695787 | 9.031313638 | PLD1      | 1.522732067 | 1.263617827 |
| SLC35B2      | 110.6816451 | 97.68508772 | PLD3      | 173.460477  | 150.6953541 |
| IL1RN        | 0.1         | 0.1         | PLD2      | 13.91999073 | 12.91743499 |
| SLC35B4      | 4.543602476 | 5.046977267 | NME1-NME2 | 109.0572728 | 137.5346018 |
| SLC35B1      | 25.87827829 | 24.88003036 | GRK5      | 3.126090801 | 3.058252502 |
| ARFIP2       | 13.7699668  | 12.93732064 | GRK4      | 0.706173068 | 0.789303866 |
| ARFIP1       | 6.402971394 | 6.230697845 | GRK6      | 25.53007968 | 30.15733248 |
| SLC35A5      | 4.879326309 | 5.252915448 | PIBF1     | 4.087268849 | 4.912473711 |
| TANGO6       | 3.356389715 | 3.156534656 | FAM199X   | 6.544363876 | 6.809349972 |
| IL1R1        | 22.66962475 | 18.68123978 | ZMYND19   | 19.83797107 | 24.60640516 |
| IL1R2        | 0.348062032 | 0.631362544 | PITPNC1   | 0.809872954 | 1.026334604 |
| TANGO2       | 14.54724275 | 12.78458552 | MYBL2     | 111.1301868 | 136.668511  |
| SLC35C2      | 21.48244531 | 20.11483786 | MYBL1     | 59.03951967 | 48.3674523  |
| SLC35C1      | 9.900441585 | 9.256558795 | ELF1      | 12.49862823 | 7.901115322 |
| IL23A        | 0.847859074 | 0.562787102 | ELF2      | 6.146513327 | 6.494420906 |
| SLC35D1      | 2.265304845 | 2.275946765 | ELF3      | 0.563850687 | 0.465459765 |
| SH2D2A       | 0.162068431 | 0.277272001 | GFOD1     | 1.827521302 | 1.288628058 |
| SLC35D2      | 4.353429541 | 4.768268321 | ELF4      | 36.86877119 | 32.2577477  |
| LOC101927903 | 0.868023102 | 1.013971007 | GFOD2     | 2.8177533   | 3.371572352 |
| SLC35E2      | 2.716548268 | 2.333665234 | ZMYND10   | 2.828700422 | 2.388829223 |
| SLC35E1      | 14.53374375 | 12.79490117 | ZMYND11   | 11.86936504 | 12.57642559 |
| SLC35E4      | 2.940766129 | 2.974724916 | ZMYND12   | 0.129268325 | 0.120898122 |
| LOC101927910 | 0.277156955 | 0.305551645 | PLEC      | 64.54955207 | 52.68107174 |
| SLC35E3      | 4.814794204 | 4.240891154 | RRN3      | 9.405741284 | 12.34919476 |
| LOC100506870 | 1.684213493 | 1.465190133 | RRM1      | 30.18648068 | 38.57749609 |
| SLC35F6      | 16.35469402 | 14.08616951 | RRM2      | 55.65186053 | 61.10985747 |
| SLC35F3      | 0.1         | 0.125661824 | HS3ST6    | 0.1         | 0.1         |
| SLC35F2      | 2.689369641 | 4.780651883 | HS3ST1    | 7.608479726 | 6.046393051 |
| CAB39L       | 1.896262413 | 1.903606135 | VPS29     | 44.42713566 | 44.75246808 |
| SLC35F5      | 4.017710056 | 3.555043036 | RRP1      | 38.59626999 | 42.96254509 |
| SIPA1L2      | 11.56258591 | 9.601481116 | GRPR      | 2.134645312 | 2.037032176 |
| SIPA1L3      | 12.70068232 | 11.02316191 | ELK1      | 40.28301307 | 40.70273021 |
| SIPA1L1      | 3.012053173 | 2.090591683 | RRP8      | 6.656957288 | 8.806854539 |
| SLC35G2      | 2.949754514 | 2.710997134 | RRP9      | 26.07563849 | 29.3157592  |
| SLC35G1      | 2.478127535 | 3.54236332  | ELK3      | 12.61081426 | 12.68028555 |
| GLTSCR2      | 53.99688985 | 70.97374194 | ELK4      | 1.893994227 | 1.693695004 |
| GLTSCR1      | 3.355949146 | 2.399119025 | ALCAM     | 71.81603978 | 58.0228049  |
| AMER1        | 1.373707726 | 1.475159779 | VPS35     | 41.45543053 | 38.15398478 |

|              |             |             |          |             |             |
|--------------|-------------|-------------|----------|-------------|-------------|
| RGPD5        | 0.3242602   | 0.260125903 | VPS36    | 6.629148984 | 7.50756086  |
| RGPD8        | 0.370468355 | 0.22705222  | VPS39    | 10.26809533 | 8.038944693 |
| BEGAIN       | 1.592418502 | 1.165614228 | VPS18    | 22.80117418 | 18.15662107 |
| TCEAL8       | 0.27145636  | 0.467268972 | TARS2    | 10.92240657 | 13.58636949 |
| TCEAL4       | 46.14498331 | 49.17876627 | VPS25    | 32.67561923 | 37.26148771 |
| TCEAL3       | 33.02556487 | 31.55585292 | VPS28    | 87.00210455 | 82.98885556 |
| TCEAL1       | 19.0615726  | 20.40836678 | RRS1     | 58.68983406 | 82.78998474 |
| SVIL         | 18.00237812 | 14.93854319 | VPS11    | 22.5375357  | 20.40223678 |
| SVIP         | 1.035048182 | 1.515400149 | ST3GAL4  | 39.77832552 | 36.47143522 |
| SPCS3        | 8.735938992 | 9.567244761 | ST3GAL5  | 1.903300956 | 1.54673035  |
| SPCS2        | 11.16938213 | 10.90771681 | ST3GAL6  | 0.114548103 | 0.151938065 |
| SPCS1        | 50.99788703 | 63.5190583  | ST3GAL1  | 2.694067801 | 3.240273287 |
| QPCT         | 11.78369881 | 12.36307431 | ST3GAL2  | 5.306802142 | 5.693300113 |
| NUPL2        | 10.33981265 | 11.43095968 | ST3GAL3  | 10.91091351 | 8.269727287 |
| NUPL1        | 21.08424129 | 23.69137627 | VPS16    | 15.51950093 | 13.14217962 |
| SIPA1        | 18.71945216 | 16.61354615 | LRRC37A3 | 0.521846203 | 0.283342745 |
| C3orf67      | 2.08849071  | 1.743412425 | PLK4     | 6.999988725 | 9.119537563 |
| C3orf62      | 0.678844312 | 0.668295025 | PLK3     | 1.662890663 | 1.766836104 |
| FPGT         | 3.433595282 | 3.053707429 | NFE2     | 1.046132528 | 0.734613218 |
| FPGS         | 20.14823667 | 19.96219641 | LRRC37A2 | 0.371050141 | 0.365214328 |
| GATSL2       | 1.516853008 | 1.224065642 | ARL14EP  | 4.532001595 | 4.710574327 |
| C3orf72      | 0.45696583  | 0.391291612 | APOOL    | 1.313026569 | 1.447940166 |
| SPECC1L      | 11.68730355 | 9.380381447 | GTF2IRD2 | 0.389987591 | 0.224233881 |
| TIMELESS     | 17.26879492 | 16.8782877  | PLK2     | 149.713822  | 129.0998953 |
| NUPR1        | 58.94393543 | 38.29234873 | PLK1     | 64.6498808  | 78.97427128 |
| LOC101927989 | 0.1         | 0.1         | ELL2     | 31.33435194 | 29.82564259 |
| CLEC16A      | 4.050438127 | 3.938070016 | ELL3     | 0.763835532 | 0.942650249 |
| CAMSAP1      | 8.997472232 | 9.970633155 | GTF2IRD1 | 8.277815902 | 7.659218726 |
| CAMSAP2      | 11.22889914 | 11.1554177  | RPS6KL1  | 2.27005334  | 2.534862496 |
| C3orf80      | 0.281365979 | 0.30144233  | EXOC8    | 3.351414039 | 2.916449345 |
| PNPT1        | 14.76303113 | 9.371531238 | EXOC7    | 22.31393852 | 19.84415178 |
| DAK          | 4.240422452 | 4.035952553 | PLLP     | 0.134703592 | 0.223895011 |
| CAMSAP3      | 0.149654745 | 0.1177272   | EXOC4    | 17.2601523  | 15.08629084 |
| DAP          | 63.36432192 | 54.34744626 | EXOC3    | 31.03769967 | 30.02763769 |
| SKIV2L       | 8.210379211 | 8.16820353  | EXOC6    | 1.667671701 | 1.822820103 |
| DBI          | 162.4477405 | 172.8094529 | EXOC5    | 6.545840499 | 6.716019769 |
| DBP          | 4.400288295 | 4.209031189 | EXOC2    | 6.117652229 | 5.636920404 |
| DBT          | 1.243264348 | 1.197562013 | EXOC1    | 11.20662552 | 10.72190469 |
| STPG1        | 0.912867686 | 0.770687288 | NFIX     | 36.0118979  | 38.43646164 |
| C3orf38      | 11.99813826 | 11.30114844 | C1orf198 | 3.39201598  | 3.256743652 |
| C3orf33      | 0.449749664 | 0.464986617 | PRUNE2   | 1.222988012 | 0.689161235 |
| C3orf36      | 0.380312646 | 0.411341922 | C1orf192 | 2.223168408 | 2.279223045 |
| DCK          | 8.569233876 | 9.803959084 | METTL21A | 2.046145652 | 2.415972914 |
| DCN          | 0.554119554 | 0.50531213  | METTL21B | 3.996345773 | 4.13594977  |
| C1QTNF9B     | 2.843301754 | 3.956324206 | APOL6    | 13.07885241 | 6.103701222 |
| DNASE2       | 66.28095941 | 52.28676267 | APOL1    | 4.026049437 | 1.378685211 |
| DNASE1       | 1.978161079 | 1.584724534 | APOL3    | 1.630081651 | 0.784092798 |
| DDN          | 1.112938894 | 2.557092204 | APOL2    | 24.8249596  | 10.67870665 |
| DDT          | 35.33206207 | 40.48735972 | ELP2     | 9.624400779 | 9.702390535 |



|              |             |             |          |             |             |
|--------------|-------------|-------------|----------|-------------|-------------|
| C3orf55      | 0.404203964 | 0.727487521 | ELP3     | 28.83454171 | 27.67870616 |
| C3orf52      | 1.354310902 | 1.272423163 | ELP4     | 3.186959936 | 3.406219159 |
| DEK          | 51.38175512 | 63.24148035 | ELP5     | 40.55888207 | 48.4939303  |
| C3orf58      | 0.946966858 | 0.892137188 | ELP6     | 14.45649078 | 14.84202008 |
| MDC1         | 3.094296366 | 3.387525857 | NFIA     | 0.105478937 | 0.1         |
| LOC101927681 | 0.523976689 | 0.604545242 | NFIB     | 2.012610289 | 1.764372389 |
| IL4I1        | 10.67587275 | 4.091437075 | NFIC     | 12.29580052 | 12.15514424 |
| AR           | 7.178946525 | 6.745341894 | PLP2     | 391.1955522 | 401.4525129 |
| CGGBP1       | 17.9206958  | 17.19649606 | FAM49B   | 16.83448435 | 22.11221457 |
| GRID2IP      | 0.189725867 | 0.180082397 | C1orf174 | 17.82961757 | 17.02385313 |
| C2           | 0.253328422 | 0.286758823 | C1orf172 | 0.1         | 0.1         |
| DYNC2LI1     | 1.314816656 | 2.064409075 | LCLAT1   | 2.184211309 | 2.108656429 |
| C3           | 0.558303757 | 0.303614321 | THG1L    | 13.18606296 | 18.4506692  |
| C5           | 0.527778127 | 0.310415215 | PODNL1   | 0.255963005 | 0.289312766 |
| CP           | 1.15055374  | 1.328063841 | CFL2     | 17.7828344  | 22.49047925 |
| CS           | 97.57847131 | 119.9455671 | CFL1     | 1153.706967 | 1095.967652 |
| LRSAM1       | 6.584373778 | 6.287808043 | PLS3     | 81.26177411 | 74.48574675 |
| RPLP1        | 835.7849945 | 1054.675552 | IL13RA2  | 6.267558738 | 6.88123504  |
| RPLP0        | 710.6076939 | 940.8655736 | PLS1     | 0.838707403 | 1.241211421 |
| QPRT         | 31.27076619 | 25.94189327 | IL13RA1  | 22.17216011 | 19.72120273 |
| ECSIT        | 19.6505689  | 23.431313   | KCMF1    | 7.920548381 | 8.439188953 |
| RPLP2        | 506.4405393 | 661.0232367 | COL27A1  | 0.219764727 | 0.180763425 |
| ACTL6A       | 38.17761487 | 43.79171199 | FKBPL    | 4.236001962 | 4.433172686 |
| SIRT4        | 0.237710476 | 0.493311238 | C1orf185 | 0.764824385 | 0.755533711 |
| SIRT5        | 2.343818926 | 2.012744576 | LEMD3    | 3.250859025 | 3.555834156 |
| SIRT6        | 10.84854006 | 10.71436213 | LEMD2    | 24.11421272 | 22.78547986 |
| SIRT7        | 11.63841272 | 10.95633419 | LEMD1    | 0.532476811 | 0.215798646 |
| F3           | 0.186838741 | 0.146503342 | TOM1L1   | 2.297938641 | 2.683909866 |
| SIRT1        | 12.65002758 | 12.05095388 | TOM1L2   | 21.40879881 | 17.42875396 |
| BIVM-ERCC5   | 6.312334307 | 7.052902235 | OBSCN    | 0.208362527 | 0.16651349  |
| SIRT2        | 51.3743057  | 44.83857204 | FKBP8    | 191.7822978 | 164.6305758 |
| SIRT3        | 3.125418955 | 3.231657723 | FKBP7    | 1.334379515 | 1.73500457  |
| F8           | 0.881913863 | 0.69114209  | FKBP9    | 54.03064645 | 39.15026384 |
| BDH2         | 0.740495196 | 0.824098449 | FKBP4    | 46.4300461  | 62.40591043 |
| BDH1         | 1.858080439 | 2.48507329  | FKBP3    | 33.03718674 | 38.48846893 |
| CDC42EP5     | 0.1         | 0.1         | FKBP5    | 0.121106965 | 0.1         |
| CDC42EP4     | 31.15518372 | 30.83082268 | FKBP2    | 98.67239557 | 93.92642032 |
| CDC42EP3     | 29.33452437 | 28.38633004 | PLTP     | 46.41440237 | 45.1616908  |
| CDC42EP2     | 4.465653527 | 5.600864979 | C1orf162 | 0.597405843 | 0.613004426 |
| CDC42EP1     | 154.0607724 | 172.8239887 | C1orf159 | 8.712847533 | 8.89849207  |
| DLD          | 23.96362094 | 28.08386384 | SLC48A1  | 4.911571796 | 4.452512577 |
| MDFI         | 0.1         | 0.1         | C1orf131 | 6.589403092 | 7.179039346 |
| FH           | 49.99214763 | 55.55250016 | ZC3H4    | 6.837544026 | 6.989652912 |
| CCNDBP1      | 0.128466453 | 0.130488356 | ZC3H3    | 19.24923599 | 15.63013573 |
| HLA-DMA      | 0.257008304 | 0.291241034 | ZC3H8    | 1.55748595  | 2.435729915 |
| HLA-DMB      | 0.1         | 0.131863278 | ZC3H6    | 0.433165309 | 0.363603573 |
| DMD          | 0.690229661 | 0.632061462 | VPS72    | 44.9760711  | 50.71313978 |
| MDH1         | 63.19718731 | 68.93777989 | EVI5L    | 6.593909622 | 4.495272294 |

|                  |             |             |                  |             |             |
|------------------|-------------|-------------|------------------|-------------|-------------|
| GK               | 1.495502745 | 1.242231367 | LOC10028956<br>1 | 2.096206608 | 2.131092672 |
| MDH2             | 186.8898151 | 232.2631331 | HDAC4            | 1.357719396 | 1.395794441 |
| TTLL7            | 2.221913451 | 2.652257596 | CEBPA            | 1.798141323 | 1.425295181 |
| TTLL5            | 9.10983887  | 9.0284886   | HDAC5            | 4.613799475 | 3.272260659 |
| TTLL4            | 5.78688183  | 6.083169489 | C1orf112         | 9.924862372 | 11.09699188 |
| TTLL3            | 2.36038008  | 1.5534493   | HDAC2            | 15.5439239  | 20.03450702 |
| TTLL1            | 3.310627666 | 2.392447137 | CEBPB            | 70.11592879 | 63.2199118  |
| TTLL9            | 0.121343992 | 0.313360036 | HDAC3            | 40.85971654 | 45.81450711 |
| HR               | 0.250583412 | 0.24111911  | C1orf110         | 0.646855547 | 1.019481878 |
| PABPC4L          | 0.635905163 | 0.617697708 | CEBPD            | 222.0660875 | 193.428508  |
| HLA-DOB          | 0.794198307 | 0.595670345 | HDAC1            | 135.8789233 | 136.7683196 |
| IK               | 88.35005035 | 98.07844099 | VPS4B            | 9.936928185 | 10.54782432 |
| VPS33A           | 13.79134691 | 12.22721299 | CEBPG            | 16.7602371  | 15.08525599 |
| VPS33B           | 2.75789098  | 2.896732825 | VPS4A            | 45.79611403 | 45.6324071  |
| NSMAF            | 21.47715011 | 23.10461734 | TULP4            | 1.473626984 | 1.178245678 |
| MDN1             | 1.36557827  | 1.807789662 | TULP3            | 17.66240851 | 18.02606034 |
| DR1              | 26.05135462 | 29.21816908 | HDAC8            | 5.353743848 | 5.897416694 |
| BDNF             | 11.97114527 | 10.16696837 | HDAC9            | 2.717816296 | 2.590439976 |
| ZC3HC1           | 15.57210974 | 17.65447408 | HDAC6            | 9.120323857 | 7.332845772 |
| MDM2             | 3.066663982 | 3.138801605 | HDAC7            | 10.76878205 | 10.25117741 |
| HLA-DRA          | 0.140586935 | 0.1         | NFS1             | 16.49148787 | 20.01573501 |
| MDM4             | 0.971267819 | 0.946646643 | HECTD1           | 14.08238824 | 12.71368508 |
| MDM1             | 2.357229616 | 2.28641936  | HECTD2           | 1.403512413 | 1.593674437 |
| SH2D4A           | 1.185184073 | 1.2349789   | VPS51            | 47.42083707 | 44.50548009 |
| MB               | 0.366416805 | 0.512157402 | HECTD3           | 19.68912539 | 18.19720897 |
| DSE              | 3.908145194 | 2.975851997 | HECTD4           | 4.35025334  | 4.03270189  |
| MDP1             | 4.091135235 | 3.804667044 | VPS53            | 4.24627161  | 3.901118966 |
| SPG11            | 4.802831313 | 3.548404765 | VPS52            | 5.466428961 | 5.70417407  |
| DSP              | 6.41637828  | 4.015283521 | VPS54            | 4.249986389 | 3.78836254  |
| DST              | 9.039495683 | 8.078705185 | C1orf109         | 6.210951218 | 7.820640074 |
| SH2D3A           | 0.425373342 | 0.363298883 | C1orf106         | 0.98953435  | 1.052715802 |
| SH2D3C           | 0.1         | 0.111760991 | MGME1            | 13.63701846 | 16.09641757 |
| VPS37C           | 7.94313892  | 6.855515056 | C1orf123         | 20.01864629 | 17.36502665 |
| VPS37D           | 1.168157097 | 1.324916391 | C1orf122         | 74.43999118 | 65.76061433 |
| VPS37A           | 18.63060783 | 19.73286445 | EVI2A            | 2.412781101 | 2.577052293 |
| VPS37B           | 12.4188064  | 14.67080196 | APOC1            | 0.516944438 | 0.397705989 |
| LOC10272474<br>7 | 0.1         | 0.1         | VPS41            | 9.675000374 | 8.263142004 |
| BDP1             | 2.358649198 | 2.092869424 | CEBPZ            | 11.22350165 | 13.4561277  |
| DTL              | 10.04499102 | 11.31620426 | VPS45            | 13.28663599 | 15.43155106 |
| RNFT2            | 0.655724495 | 0.791195643 | EVI2B            | 1.277515412 | 0.928218866 |
| COL15A1          | 44.52974388 | 30.10645755 | C1orf116         | 0.1         | 0.133709711 |
| HSD17B14         | 0.519977987 | 0.429859198 | C1orf115         | 1.655741471 | 1.210827991 |
| HSD17B12         | 5.28492116  | 5.988425593 | C6orf89          | 17.45465652 | 15.49018984 |
| HSD17B11         | 2.263480835 | 3.268748846 | NFU1             | 15.50263991 | 16.81412178 |
| HSD17B10         | 95.47887611 | 115.4655532 | RPS6KA4          | 19.27742389 | 18.4046762  |
| RNFT1            | 3.578880155 | 3.209580399 | RPS6KA3          | 5.830707873 | 5.410775595 |
| SLITRK2          | 8.422141201 | 6.145632184 | RPS6KA5          | 0.875991261 | 0.950213956 |

|                  |             |             |                  |             |             |
|------------------|-------------|-------------|------------------|-------------|-------------|
| SLITRK4          | 4.129165613 | 3.524272718 | LOC10272372<br>6 | 0.1         | 0.180815177 |
| SLITRK6          | 0.435490189 | 0.339546158 | NIPAL1           | 0.147357591 | 0.1         |
| SLITRK5          | 1.28071084  | 1.621601052 | RPS6KA2          | 4.629483124 | 3.395619604 |
| LINGO2           | 2.556287199 | 2.277964021 | NIPAL2           | 0.88638645  | 0.867612559 |
| DUT              | 13.05150661 | 16.36542888 | NIPAL3           | 0.904258619 | 0.728946422 |
| LINGO3           | 0.124390271 | 0.1         | RPS6KA1          | 5.280511833 | 5.816606416 |
| PC               | 22.22142877 | 17.84184236 | LOC10272372<br>8 | 2.001877192 | 1.172085728 |
| PABPC1L          | 2.245058625 | 2.652685443 | C1orf101         | 0.900699645 | 1.142537762 |
| MDGA1            | 8.224860091 | 4.339571255 | TWSG1            | 12.27175818 | 11.25985298 |
| SPG21            | 54.25715591 | 56.13500878 | GSAP             | 0.259800913 | 0.145640315 |
| SPG20            | 31.03250509 | 26.92022862 | OBSL1            | 15.82354303 | 11.99389855 |
| TXNDC11          | 14.45607982 | 12.57834602 | SLC22A4          | 0.502906801 | 0.319992774 |
| TXNDC12          | 36.66796284 | 43.91952002 | SPRR2E           | 0.1         | 0.1         |
| TXNDC15          | 21.56211605 | 19.73808797 | SLC22A5          | 1.245870193 | 1.095074502 |
| TXNDC16          | 1.588799793 | 1.618614862 | CRHR1            | 0.196277385 | 0.223738879 |
| TXNDC17          | 27.46517867 | 35.62101599 | LOC10272374<br>3 | 0.460772757 | 0.57226369  |
| SLC34A3          | 0.412380481 | 0.271573387 | GSE1             | 2.465538609 | 3.090053801 |
| SLC34A2          | 0.1         | 0.108889088 | FAM43A           | 23.32527677 | 18.15760522 |
| LOC10272470<br>5 | 2.816406639 | 2.342621158 | FAM43B           | 0.1         | 0.1         |
| DXO              | 7.827344028 | 8.218723163 | SPRR2A           | 0.1         | 0.1         |
| LOC10272470<br>8 | 3.568796444 | 1.943188381 | ARGLU1           | 25.66525684 | 32.22367814 |
| LOC10272470<br>9 | 0.544028008 | 0.705266115 | SPRR2D           | 0.1         | 0.1         |
| EPHA10           | 0.1         | 0.1         | ZHX1-<br>C8ORF76 | 9.898276208 | 9.258153666 |
| MST1R            | 2.081377286 | 1.506966487 | C6orf99          | 0.196295231 | 0.1         |
| OSGEP            | 13.65528704 | 14.38981417 | MPHOSPH10        | 8.106977498 | 11.45962192 |
| SWI5             | 16.46385789 | 17.94754988 | TECPR2           | 3.862071519 | 3.200433415 |
| DYM              | 9.615975176 | 9.431932475 | SPRR1B           | 0.1         | 0.1         |
| TF               | 0.193069289 | 0.113290636 | TECPR1           | 3.834704507 | 3.425238569 |
| PCSK9            | 0.142009119 | 0.169988993 | FAM45A           | 6.877022848 | 5.684339731 |
| PCSK7            | 15.80773811 | 13.33048872 | RSF1             | 4.000794047 | 3.937439866 |
| SLC7A11          | 1.456936339 | 1.253425565 | C6orf47          | 5.703308807 | 5.576840128 |
| PCSK6            | 0.122815668 | 0.1         | C6orf48          | 44.46493396 | 54.55677822 |
| PCSK4            | 1.236548755 | 0.68900405  | GSG2             | 8.959763717 | 11.27997214 |
| CLYBL            | 1.250066437 | 1.657388656 | TYK2             | 15.08124159 | 13.71341927 |
| HYAL1            | 0.201985232 | 0.143691597 | MTSS1            | 4.717458332 | 4.182931848 |
| HYAL2            | 40.72663061 | 43.15874822 | NFX1             | 24.11155933 | 22.09577394 |
| HYAL3            | 3.812713367 | 3.74266619  | MEGF6            | 52.70773887 | 37.41855621 |
| SSSCA1           | 61.66305758 | 67.70893896 | TYMS             | 47.58799607 | 53.36281726 |
| L3HYPDH          | 5.537126991 | 6.248700261 | TYMP             | 27.80922695 | 13.68576352 |
| G2E3             | 4.754298242 | 4.925365462 | C6orf62          | 46.1716148  | 38.39863557 |
| IGHMBP2          | 6.078207138 | 5.850815343 | EMC1             | 20.13757093 | 22.15854553 |
| ALS2CL           | 0.16779201  | 0.110756609 | EMC2             | 29.13900135 | 33.14916421 |
| PLK1S1           | 2.601969723 | 3.015625056 | SUSD4            | 2.312118891 | 1.248722565 |

|          |             |             |          |             |             |
|----------|-------------|-------------|----------|-------------|-------------|
| PLEKHG4B | 2.054111651 | 1.69586035  | EMC3     | 64.16981248 | 64.34268859 |
| XK       | 0.1         | 0.107294821 | SUSD3    | 0.1         | 0.1         |
| THEMIS2  | 13.85068675 | 5.696807011 | EMC4     | 59.94072591 | 63.48248642 |
| GLB1L    | 1.536361089 | 1.33564844  | FAM47E   | 0.291584304 | 0.213995594 |
| DKC1     | 59.90835746 | 76.36011195 | SUSD5    | 10.87431079 | 9.008529019 |
| EBP      | 48.41423857 | 48.86424093 | EMC6     | 58.13837555 | 60.90517031 |
| HCAR1    | 0.187254412 | 0.199682005 | EMC7     | 63.24002448 | 57.28977233 |
| ECD      | 18.89230695 | 20.3938118  | EMC8     | 23.58917207 | 29.26160518 |
| STT3A    | 127.8225878 | 112.7926615 | EMC9     | 15.91125821 | 16.05195763 |
| STT3B    | 67.40131622 | 65.5184923  | FAM46B   | 0.800269951 | 0.693756662 |
| ACTL10   | 1.432084025 | 1.50840769  | NFYA     | 9.606440456 | 10.50235179 |
| MEA1     | 130.2055503 | 126.4393209 | FAM46C   | 0.317977386 | 0.411279716 |
| EED      | 6.012896406 | 6.342566614 | NFYB     | 5.829262021 | 5.799419559 |
| DARS2    | 16.39570886 | 19.07250024 | NFYC     | 29.89787959 | 28.58898799 |
| SGK223   | 11.04082599 | 7.962350439 | SUSD2    | 2.172828205 | 1.906344881 |
| ACVR1B   | 3.613666482 | 3.431906115 | SUSD1    | 2.122762244 | 1.953504734 |
| ACVR1C   | 0.129265028 | 0.125074921 | FAM46A   | 38.24882616 | 27.33896272 |
| EFS      | 0.1         | 0.111889156 | C6orf57  | 6.43310805  | 9.355877655 |
| APOPT1   | 15.36988951 | 18.51192216 | RSG1     | 3.963043673 | 2.810727528 |
| MDH1B    | 0.669329063 | 0.491993145 | SLURP1   | 0.196743533 | 0.238153319 |
| EGF      | 0.424695481 | 0.358334372 | GSTA4    | 8.157598908 | 7.665948908 |
| SWT1     | 1.326983183 | 1.004970574 | C6orf52  | 1.235960867 | 1.830340113 |
| ACVR2B   | 0.341231617 | 0.288493222 | MEGF8    | 5.277914505 | 4.458157609 |
| ACVR2A   | 0.690795655 | 0.736216124 | MEGF9    | 0.760893862 | 0.936261395 |
| RPL30    | 1158.594722 | 1648.580814 | SPPL2B   | 13.44528216 | 10.52331485 |
| EHF      | 0.357278885 | 0.215664128 | SPPL2A   | 18.70865171 | 15.24344762 |
| TMEM200B | 9.326319681 | 7.064205281 | PMCH     | 1.747068226 | 2.746083188 |
| RPL32    | 384.9210127 | 558.0214079 | ROGDI    | 9.051971908 | 7.599796952 |
| RPL31    | 150.2939487 | 215.6010061 | PAIP2B   | 0.132984938 | 0.129439814 |
| TMEM200A | 0.65850467  | 0.653864715 | EME1     | 4.293178685 | 5.378906401 |
| RPL34    | 110.0495143 | 163.6447246 | EME2     | 1.639562309 | 1.838389593 |
| TMEM200C | 0.1         | 0.1         | POSTN    | 0.899250415 | 0.703603296 |
| ABCA13   | 0.103023235 | 0.1         | PPAPDC2  | 1.651044499 | 1.443901358 |
| GPR173   | 0.1         | 0.1         | TRPC4AP  | 42.98848323 | 38.11859492 |
| GPR176   | 11.65238387 | 7.282690002 | MYADM    | 74.88079776 | 59.89994305 |
| RPL36    | 482.4632533 | 645.3450768 | PMEL     | 0.137673152 | 0.19414763  |
| RPL35    | 803.9895424 | 1206.628075 | ISYNA1   | 53.38386348 | 50.30515588 |
| ADNP2    | 7.54364993  | 7.115396313 | GSTCD    | 4.208713317 | 4.428552627 |
| RPL38    | 338.5784729 | 465.2911248 | PMF1     | 29.02322867 | 31.63661823 |
| RPL37    | 265.9780322 | 371.3724377 | EMG1     | 61.01674921 | 72.21216633 |
| ANKS1A   | 4.366880024 | 4.756171486 | TASP1    | 1.793197294 | 1.90634935  |
| RPL39    | 30.60122705 | 39.40742191 | DIAPH1   | 28.00947432 | 29.49980893 |
| CSRP2BP  | 8.101112124 | 8.859177096 | DIAPH2   | 3.446650594 | 3.494529355 |
| ANKS1B   | 0.921447315 | 0.994831902 | DIAPH3   | 14.06690932 | 16.31421383 |
| MED1     | 9.944473693 | 9.988135608 | PXMP2    | 19.534229   | 20.99211658 |
| MECR     | 7.660801    | 11.0918947  | PXMP4    | 2.369011049 | 2.685704456 |
| RPL21    | 14.61714067 | 23.7646438  | COLGALT2 | 1.503546657 | 1.388488983 |
| RPL23    | 320.5412387 | 523.5327574 | CGB7     | 0.1         | 0.1         |
| RPL22    | 81.02937536 | 125.686436  | NTMT1    | 35.03169394 | 40.51242393 |
| MED8     | 30.31968966 | 27.00787448 | COLGALT1 | 127.8021092 | 119.455874  |

|          |             |             |           |             |             |
|----------|-------------|-------------|-----------|-------------|-------------|
| MED9     | 8.750752692 | 9.365194522 | OXSR1     | 25.24022987 | 25.58235601 |
| AARSD1   | 3.070820824 | 4.424026702 | RPS6KC1   | 9.833316886 | 7.86890835  |
| MED4     | 13.45695272 | 16.25469589 | TYW1      | 4.007156086 | 4.587908928 |
| DKK1     | 55.79292019 | 46.68862865 | PDSS2     | 2.966680824 | 3.400044063 |
| MED6     | 7.546277755 | 9.269517604 | PDSS1     | 7.744817342 | 11.09676677 |
| MED7     | 5.693020426 | 6.612920795 | ATP13A1   | 31.28378656 | 28.4458929  |
| DKK3     | 17.0406338  | 10.22025621 | RPS6KB1   | 3.0935455   | 4.564286958 |
| GPR162   | 3.032067301 | 2.046116826 | RPS6KB2   | 38.3272498  | 38.36451687 |
| ABCA10   | 0.518498677 | 0.785518471 | ATP13A2   | 13.58185041 | 12.99384305 |
| GPR161   | 3.282996668 | 2.798572572 | ATP13A3   | 10.37257101 | 10.10246621 |
| GPR160   | 0.219154305 | 0.270156726 | SCAMP5    | 3.902378937 | 5.176262786 |
| RPL24    | 319.9423814 | 448.5301868 | SCAMP4    | 48.06135309 | 40.05773007 |
| RPL27    | 743.4755451 | 1100.485325 | LACTB     | 12.16042597 | 10.22667041 |
| RPL26    | 741.6298362 | 1083.505474 | CYP2D6    | 0.253975332 | 0.341870675 |
| RPL29    | 506.531513  | 690.6919657 | TYW5      | 0.728832962 | 0.928919915 |
| RPL28    | 165.3694837 | 184.9558243 | TYW3      | 8.886311316 | 11.25772308 |
| OSER1    | 26.60306262 | 23.43292094 | FIBCD1    | 4.039811303 | 1.626133948 |
| VPS26A   | 30.45938799 | 32.14211097 | NGDN      | 12.36809123 | 14.23222326 |
| VPS26B   | 24.07206648 | 25.73935825 | SCAMP1    | 12.78626059 | 11.26685867 |
| RPL41    | 301.3996149 | 402.2922264 | HSPG2     | 1.376254628 | 1.028793659 |
| PRRC2C   | 27.24719824 | 25.88129413 | EML1      | 6.458148445 | 6.772426233 |
| PRRC2B   | 19.32695064 | 16.84636285 | SCAMP3    | 175.947802  | 155.7208816 |
| SLC16A14 | 0.560686631 | 0.454241696 | EML2      | 5.17268361  | 3.534645016 |
| PRRC2A   | 32.70501306 | 33.19444275 | SCAMP2    | 32.131926   | 26.62046118 |
| SLC16A13 | 6.965414749 | 3.580230694 | EML3      | 15.15070789 | 15.81516287 |
| GPR180   | 8.540984946 | 7.113409672 | EML4      | 10.42687745 | 12.50465119 |
| SPEF2    | 0.369832959 | 0.401040141 | EML5      | 0.833743694 | 0.905704658 |
| ELL      | 8.962807867 | 8.169155592 | EML6      | 0.417542505 | 0.482608871 |
| SPEF1    | 0.263677621 | 0.146747531 | PRKAR1B   | 5.897225504 | 6.345298142 |
| GPR137   | 25.19799463 | 21.98611923 | PRKAR1A   | 25.89657583 | 25.13464406 |
| EMB      | 6.803390577 | 7.890721835 | RBCK1     | 36.7969375  | 22.31352312 |
| EMD      | 124.2166057 | 137.1738867 | LOC391722 | 0.1         | 0.1         |
| GPR135   | 0.670893154 | 0.60953525  | NGEF      | 3.787496418 | 3.630003879 |
| ZC3H10   | 5.611097275 | 5.923836556 | SHOX2     | 4.260827388 | 3.267718082 |
| EN1      | 10.53585746 | 8.928962577 | AAAS      | 23.8273388  | 29.66225328 |
| GCFC2    | 1.762628202 | 2.432493208 | HSPH1     | 124.6861407 | 115.1749618 |
| AFTPH    | 4.030358491 | 3.724866384 | PRKAR2B   | 1.675141148 | 1.883275948 |
| GPR126   | 0.14477915  | 0.158617415 | PRKAR2A   | 10.19102124 | 11.31127483 |
| GPR125   | 5.890059115 | 7.426239958 | RSU1      | 45.17516921 | 44.31664122 |
| ENG      | 0.197378214 | 0.20429475  | EXPH5     | 0.125498811 | 0.118206619 |
| PCYOX1   | 8.921185769 | 8.640557509 | NGFR      | 0.175952159 | 0.251847464 |
| GPR124   | 0.539097634 | 0.530326754 | GLYATL2   | 0.739979499 | 1.175193222 |
| RPL10    | 548.2778618 | 738.9588207 | PMM1      | 22.80044929 | 19.42659817 |
| RPL12    | 598.5629679 | 845.1725494 | PMM2      | 19.646025   | 19.08620903 |
| RPL11    | 876.7163424 | 1217.537555 | GRIN2D    | 6.587534293 | 6.451092265 |
| GPR153   | 3.752625304 | 3.862122684 | GRIN3B    | 0.898267931 | 0.487585018 |
| RPL14    | 254.6104905 | 404.5109908 | LAD1      | 1.271145377 | 0.923153388 |
| RPL13    | 149.7601534 | 173.439006  | AACS      | 1.586110001 | 1.808945325 |
| RPL15    | 215.4992537 | 291.927475  | NIPBL     | 6.115726846 | 5.827119313 |

|          |             |             |                  |             |             |
|----------|-------------|-------------|------------------|-------------|-------------|
| GPR156   | 0.804901994 | 0.854969461 | LOC10272348<br>9 | 0.833368165 | 0.801301352 |
| RPL18    | 509.6559297 | 657.4654995 | APPL2            | 2.782482679 | 2.94467941  |
| GPR155   | 0.271933006 | 0.394631979 | APPL1            | 7.214264955 | 8.821198944 |
| RPL17    | 121.9670142 | 179.7929234 | NIPA1            | 2.252436761 | 1.919393984 |
| GPR158   | 1.877711414 | 1.486229533 | EMP1             | 115.6008062 | 97.50525875 |
| GPR157   | 1.794613222 | 1.833709811 | EMP2             | 0.651499756 | 0.59401611  |
| RPL19    | 441.2074816 | 567.3401636 | EMP3             | 437.4558046 | 379.3643577 |
| F10      | 0.438224459 | 0.244899087 | NIPA2            | 19.94136289 | 23.98502407 |
| F12      | 0.505275686 | 0.841521606 | FAHD2A           | 5.513142268 | 4.724431361 |
| NMNAT2   | 6.649972151 | 6.471390053 | FAHD2B           | 1.643107237 | 1.752710374 |
| GPR143   | 0.130631649 | 0.12187156  | PICK1            | 5.631739959 | 5.243096896 |
| NMNAT1   | 3.39762139  | 3.200173634 | PMS2             | 8.489874772 | 9.360461795 |
| MSRB2    | 3.857933343 | 3.192887406 | PMS1             | 4.718219169 | 5.694150025 |
| MSRB3    | 2.209351128 | 1.711381591 | AADAT            | 0.234010173 | 0.243528588 |
| GPR146   | 0.790382418 | 0.538173982 | EMR2             | 0.1         | 0.1         |
| MSRB1    | 7.510752751 | 7.752198143 | HDDC2            | 12.2916619  | 17.96951163 |
| COL16A1  | 1.402503363 | 1.362158233 | FAM13B           | 7.90240985  | 8.294684849 |
| MEN1     | 14.93854254 | 16.51872929 | UBE2D4           | 6.55381386  | 6.760276317 |
| RNF43    | 0.1         | 0.1         | UBE2D2           | 47.24936264 | 51.77565389 |
| RNF44    | 8.844026633 | 11.0773008  | FAM13A           | 1.265856607 | 1.884707417 |
| F2R      | 8.335845484 | 8.842929455 | UBE2D3           | 48.36608761 | 49.8384999  |
| RNF40    | 18.15649966 | 19.80261659 | UBE2D1           | 7.300779633 | 7.309261675 |
| RNF41    | 11.33447532 | 11.19557658 | HDDC3            | 7.383790922 | 8.813857049 |
| MELK     | 39.30540284 | 43.16334234 | PMPCB            | 11.2087446  | 13.96653571 |
| GAPDHS   | 0.622298361 | 1.44255025  | PMPCA            | 33.17117075 | 44.5687519  |
| ERF      | 69.97014626 | 70.20180314 | LAG3             | 0.360799583 | 0.491052957 |
| ERH      | 171.1954665 | 214.3292294 | UBE2E3           | 32.79545894 | 38.24997736 |
| ABHD4    | 2.796924215 | 2.011174838 | UBE2E1           | 51.43180375 | 58.16393058 |
| ABHD3    | 2.261173122 | 2.726266965 | UBE2E2           | 23.89132343 | 24.69596132 |
| ABHD2    | 5.219473259 | 4.770786281 | FBLIM1           | 4.657643763 | 3.218211994 |
| ABHD1    | 0.1         | 0.189491354 | TNFRSF11B        | 10.95086348 | 10.69381557 |
| ABHD8    | 19.53822899 | 17.74191444 | NTPCR            | 19.2203084  | 20.37858815 |
| ABHD6    | 4.834219138 | 5.088577145 | TNFRSF11A        | 0.439329046 | 0.293829738 |
| ABHD5    | 3.089163704 | 3.294547096 | SOCS2            | 6.210854578 | 4.759294988 |
| GPR110   | 0.105232804 | 0.103736318 | SOCS3            | 19.63155426 | 18.24727384 |
| OARD1    | 4.87916347  | 5.250212169 | SOCS1            | 3.560570259 | 2.021819465 |
| ESD      | 88.39973754 | 97.84561741 | LOC10272346<br>7 | 0.335339873 | 0.394064738 |
| GPR115   | 0.1         | 0.1         | PMVK             | 29.45507105 | 30.82619153 |
| GPR114   | 0.1         | 0.1         | SOCS6            | 4.107873061 | 3.970585249 |
| STRA6    | 22.42478138 | 22.11679588 | SOCS7            | 2.567978688 | 2.38758207  |
| GPR108   | 24.97983015 | 21.18997176 | SOCS4            | 3.544651903 | 4.151637144 |
| PALB2    | 4.888018134 | 5.228099365 | SOCS5            | 9.637839764 | 7.568182458 |
| GPR107   | 19.41107795 | 15.47641757 | BRPF1            | 14.77062639 | 13.95639638 |
| RNF10    | 19.61957024 | 20.19306493 | BRPF3            | 7.635375596 | 6.330254711 |
| RNF11    | 30.92600169 | 27.90252403 | GFPT2            | 31.76077491 | 41.90023442 |
| CALCOCO1 | 12.14123491 | 10.21991205 | GFPT1            | 4.923237021 | 3.897644727 |
| SFT2D3   | 2.095993566 | 2.316940561 | TNFRSF10C        | 0.239093111 | 0.224143796 |
| RNF13    | 10.29751879 | 9.257817754 | BCDIN3D          | 1.730972684 | 1.903902202 |

|              |             |             |              |             |             |
|--------------|-------------|-------------|--------------|-------------|-------------|
| RNF14        | 25.05745029 | 23.45715158 | TNFRSF10B    | 7.416200537 | 8.627907727 |
| CALCOCO2     | 17.73077434 | 14.6353006  | TNFRSF10A    | 0.812474656 | 0.714703325 |
| ADRA1D       | 1.113303227 | 0.475672351 | TNFRSF10D    | 0.481778745 | 0.896822111 |
| ADRA1B       | 1.828636102 | 1.433020169 | TFCP2        | 8.238800323 | 10.33459497 |
| RPL7A        | 590.3015298 | 788.7469802 | AAK1         | 0.722975576 | 0.632034831 |
| PDCD6IP      | 36.66282425 | 36.56576785 | MYD88        | 60.76405203 | 29.11450437 |
| RANGAP1      | 53.93607646 | 61.1286339  | ST6GALNAC2   | 0.248079649 | 0.276219317 |
| ADRA2B       | 0.1         | 0.122652926 | ATRAID       | 60.72358871 | 58.86683083 |
| COASY        | 25.4965961  | 27.85171681 | MRPL4        | 39.25795086 | 54.01306847 |
| EVC          | 4.333196409 | 3.03111266  | MRPL3        | 63.86106273 | 89.34469458 |
| LOC102724867 | 0.523844917 | 0.575566233 | NGRN         | 39.53574207 | 42.25246156 |
| EVL          | 4.803407792 | 5.452321817 | MRPL2        | 23.04086092 | 27.51662876 |
| SFT2D2       | 8.47532269  | 7.90017513  | MRPL1        | 8.204246298 | 10.9361913  |
| SSX2IP       | 6.480737753 | 7.746631434 | DGCR8        | 8.869651401 | 9.381748218 |
| SFT2D1       | 46.1118401  | 51.90299618 | MRPL9        | 60.05306035 | 65.67513587 |
| RNF31        | 21.98498676 | 18.67837738 | DGCR6        | 0.228380421 | 0.191665979 |
| RNF32        | 1.187403918 | 1.320098588 | EID2B        | 1.158524678 | 1.034812767 |
| SMARCD1      | 23.05350121 | 22.61544309 | DGCR2        | 14.60557511 | 13.86554249 |
| SMARCD2      | 11.80310355 | 13.87974621 | RAD23A       | 76.38649897 | 75.10314105 |
| SMARCD3      | 10.84854006 | 11.50358352 | LOC102723410 | 0.506777336 | 0.722385338 |
| RNF34        | 26.17671101 | 28.9850973  | RAD23B       | 70.89952979 | 72.93361989 |
| RNF38        | 5.80100548  | 6.004872021 | ST6GALNAC3   | 1.161632976 | 1.561516691 |
| LOC102724873 | 1.989137345 | 1.152125441 | ST6GALNAC4   | 26.64399959 | 34.69343587 |
| PUF60        | 161.8441187 | 170.073881  | ST6GALNAC5   | 2.274925489 | 1.897066551 |
| RNF39        | 0.45911021  | 0.399146501 | ST6GALNAC6   | 24.16003093 | 27.84463691 |
| GCN1L1       | 19.75853582 | 19.59283882 | C1orf233     | 38.00030929 | 35.73810029 |
| MEST         | 20.00947142 | 17.81042824 | SLC47A1      | 1.953705217 | 1.695083083 |
| RNF20        | 12.64632564 | 12.14478252 | CECR5        | 23.6670146  | 34.47543773 |
| SMARCE1      | 1.214006764 | 1.568470084 | CECR6        | 0.1         | 0.122145771 |
| RNF24        | 3.189960637 | 2.914143701 | C1orf228     | 0.128942216 | 0.161995821 |
| RNF25        | 21.29984845 | 21.22537715 | C1orf227     | 0.408011524 | 0.1         |
| RNF26        | 33.48538545 | 35.78419254 | AAMP         | 32.92810754 | 39.01473875 |
| PNRC1        | 33.29718261 | 23.59471097 | C1orf226     | 2.6560129   | 2.419509179 |
| PNRC2        | 29.05257347 | 31.71521817 | BAIAP2       | 2.316298511 | 2.125129001 |
| TRMT61A      | 13.6768996  | 16.03183564 | BAIAP3       | 0.155491644 | 0.163395285 |
| TRMT61B      | 4.52318356  | 5.752635952 | VIPAS39      | 9.041428944 | 8.195998545 |
| BET1         | 2.968563851 | 2.796634722 | C1orf210     | 0.1         | 0.1         |
| AFG3L2       | 16.41875575 | 17.08078221 | RTCA         | 26.71933521 | 27.43626505 |
| COX7A2L      | 53.16750853 | 57.75037823 | RTCB         | 50.36650662 | 48.82873524 |
| AKAP9        | 1.072592525 | 1.200525    | UBE2L6       | 97.68502212 | 29.56925424 |
| ANKRA2       | 2.676291715 | 3.10398616  | UBE2L3       | 43.57588754 | 50.78067039 |
| LOC102724829 | 1.062060685 | 0.224896182 | ENTPD1       | 0.789149593 | 1.209331029 |
| EZR          | 55.23533428 | 50.88213731 | ENTPD2       | 1.50943493  | 0.947463102 |
| BEX4         | 0.1         | 0.1         | ENTPD3       | 0.1         | 0.1         |
| C17orf103    | 4.885985616 | 4.121698819 | ENTPD4       | 13.69349167 | 11.74971948 |
| BEX2         | 0.1         | 0.1         | ENTPD5       | 4.644241919 | 4.491285703 |

|                |             |             |           |             |             |
|----------------|-------------|-------------|-----------|-------------|-------------|
| C17orf104      | 0.155479792 | 0.147536309 | ENTPD6    | 65.67421991 | 58.5804909  |
| BEX1           | 4.981732523 | 3.628679381 | ENTPD7    | 2.917696378 | 2.528139457 |
| C17orf107      | 0.285419872 | 0.232393195 | VWA5B2    | 0.124732815 | 0.179468578 |
| C17orf100      | 1.69850083  | 1.407807141 | ASRGL1    | 0.422145165 | 0.575369637 |
| GNG10          | 20.21818375 | 21.76535761 | LPPR2     | 60.66878737 | 53.54372757 |
| HIST1H3A       | 0.875392194 | 0.416368155 | LPPR3     | 60.51757222 | 53.32476713 |
| LOC102724833   | 2.244259803 | 2.786036653 | LAP3      | 91.83111192 | 55.38797149 |
| HIATL1         | 27.66662665 | 25.93544563 | C1orf216  | 13.37997878 | 11.45329285 |
| HIST1H3G       | 0.767468227 | 0.417723051 | RTF1      | 11.14003436 | 11.57326032 |
| HIST1H3H       | 2.95567273  | 1.433194133 | UBE2J2    | 28.68591153 | 34.12276363 |
| HIST1H3B       | 0.760397589 | 0.650125346 | AARD      | 6.732077912 | 7.867759322 |
| HIST1H3C       | 1.11865249  | 1.877933891 | UBE2J1    | 15.58248558 | 15.46050456 |
| HIST1H3D       | 1.284556804 | 0.94579532  | SPATA5L1  | 4.737795991 | 5.003251851 |
| GPM6B          | 0.26154004  | 0.203808301 | LARS      | 49.97279734 | 58.46842399 |
| HIST1H3E       | 0.1         | 0.180290403 | AAR2      | 27.81448143 | 29.22267698 |
| HIST1H4K       | 0.24675502  | 0.519143121 | AARS      | 110.2634285 | 90.30626774 |
| TREX1          | 39.17342045 | 17.00698355 | AATK      | 0.19636668  | 0.16880758  |
| SLC33A1        | 8.483635618 | 6.806344921 | TNFRSF13C | 0.1         | 0.1         |
| TREX2          | 0.224186319 | 0.366013941 | WASL      | 6.758922392 | 6.781454263 |
| IGFL2          | 0.388618205 | 0.223647221 | IER3IP1   | 24.86666595 | 26.4161405  |
| IGFL1          | 0.1         | 0.148236887 | AATF      | 34.45918178 | 34.97648599 |
| GNG12          | 56.98835682 | 59.04346297 | IMMP2L    | 1.293890147 | 1.73185104  |
| GNG11          | 40.83328635 | 46.09832137 | ENC1      | 13.37939659 | 12.84722628 |
| GNG13          | 0.311184053 | 0.175394647 | WARS      | 271.3133872 | 122.6072107 |
| HIST1H4B       | 0.1         | 0.307810455 | TNFRSF12A | 101.2365131 | 102.1179343 |
| CDAN1          | 1.901270491 | 1.927260194 | MRPS2     | 54.26390429 | 74.3965417  |
| IGFL4          | 0.825323239 | 0.617894118 | MRPS7     | 33.14321504 | 41.10019498 |
| HIST1H4H       | 4.128307573 | 1.587733937 | MRPS6     | 49.63737926 | 44.91275025 |
| HIST1H4E       | 0.375603591 | 0.788751096 | MRPS5     | 23.21378307 | 31.99070999 |
| ITM2B          | 113.2913108 | 102.6371967 | ENAH      | 19.14985331 | 18.63018626 |
| ITM2C          | 24.2519663  | 22.770512   | LAT2      | 0.266310611 | 0.471090098 |
| OLA1           | 12.62269073 | 16.4500457  | IMMP1L    | 1.022460124 | 2.255593192 |
| QRFP           | 0.352804268 | 0.461013783 | MRPS9     | 7.867749232 | 10.78556227 |
| ANKRD9         | 20.56565457 | 21.29071895 | CXorf40A  | 11.99886098 | 11.05377831 |
| EPM2AIP1       | 0.407280036 | 0.389213824 | GREB1L    | 0.112066259 | 0.134462122 |
| GLIPR1         | 27.95716029 | 31.01338753 | NEDD9     | 2.751853768 | 1.620741539 |
| GLIPR2         | 0.916975727 | 0.578634402 | CXorf40B  | 23.88922953 | 28.20045092 |
| ANKRD1         | 0.1         | 0.1         | NEDD8     | 127.4429701 | 140.9391301 |
| TNFAIP8L1      | 10.34163016 | 11.36813682 | CRIP2     | 109.9697535 | 94.35842528 |
| GPNPAT1        | 11.59976759 | 13.80992926 | CRIP1     | 1.074086443 | 1.027354154 |
| TNFAIP8L3      | 0.375969599 | 0.395571045 | ARVCF     | 1.212470172 | 1.187375765 |
| ANKRD2         | 0.1         | 0.176693659 | FAM172A   | 2.774610234 | 3.47934141  |
| DLAT           | 14.5521615  | 19.31283204 | SCAND1    | 55.61321719 | 53.50910578 |
| ANKRD6         | 0.199592898 | 0.164646508 | SCAND3    | 0.1         | 0.1         |
| RSPRY1         | 8.365893771 | 7.876413691 | NPDC1     | 27.67361625 | 27.48365147 |
| STRBP          | 5.532813278 | 5.88983017  | YIPF1     | 13.47683958 | 12.06837521 |
| MSANTD3-TMEFF1 | 8.658940866 | 8.863001459 | YIPF2     | 61.32258179 | 50.63937471 |
| IGFN1          | 8.299591895 | 9.503889376 | YIPF3     | 100.0507871 | 81.28506747 |



|             |             |             |         |             |             |
|-------------|-------------|-------------|---------|-------------|-------------|
| MSS51       | 0.292968012 | 0.344947032 | YIPF4   | 7.185466783 | 7.537710673 |
| PALD1       | 1.714594294 | 1.999766882 | YIPF5   | 28.79130761 | 21.39181505 |
| RPUSD4      | 9.923589396 | 11.824828   | CRIP1   | 0.932395578 | 0.933249413 |
| MDFIC       | 10.10492401 | 10.08581657 | HUWE1   | 22.69057631 | 18.68860359 |
| RPUSD1      | 33.07005431 | 40.4331202  | KLK14   | 0.230203702 | 0.1         |
| RPUSD2      | 5.32442353  | 5.834953323 | UBE2G1  | 22.12497104 | 28.0969277  |
| RPUSD3      | 43.83730164 | 47.6240662  | UBE2G2  | 10.73382342 | 15.20065541 |
| FRG1        | 14.34550836 | 18.7004304  | KLK10   | 0.15017831  | 0.12388549  |
| STRAP       | 64.25587692 | 75.06639561 | KLK11   | 0.1         | 0.1         |
| RPS10-NUDT3 | 72.86054687 | 97.58035919 | NEDD1   | 7.564716313 | 7.912256209 |
| AKAP8       | 14.55779258 | 16.12911894 | NEDD4   | 6.95986475  | 6.924506816 |
| AKAP7       | 0.737438981 | 0.580428873 | YIPF6   | 5.318283313 | 5.048250757 |
| AKAP6       | 0.115004701 | 0.110713632 | FAM171B | 0.945895289 | 1.111165525 |
| AKAP5       | 0.180085212 | 0.254392244 | RTKN    | 2.498361127 | 1.968153352 |
| AKAP3       | 0.298020562 | 0.216439087 | BCCIP   | 13.71786665 | 22.37228446 |
| AKAP2       | 11.68017183 | 10.86859058 | OGDHL   | 4.781414911 | 5.020252238 |
| AKAP1       | 9.746189987 | 12.40415309 | C11orf1 | 3.901312949 | 6.357755676 |
| NCR3LG1     | 1.23963942  | 1.221775944 | FAM174B | 0.119753337 | 0.1         |
| PDZK1IP1    | 0.1         | 0.1         | FAM174A | 15.05681808 | 16.45712138 |
| FAH         | 2.644080342 | 3.918820669 | SH3GL1  | 86.47411129 | 90.65941907 |
| FAP         | 3.071314043 | 3.542552113 | FAM173B | 5.35837273  | 6.938228895 |
| DLC1        | 2.00328251  | 1.334984273 | FAM173A | 4.798084025 | 4.353918139 |
| FAS         | 2.421684654 | 2.27960204  | UBE2V2  | 20.34690719 | 28.18864606 |
| FAU         | 259.2239345 | 319.8839682 | UBE2V1  | 43.93702045 | 49.88314627 |
| SIRPG       | 0.705492739 | 0.986282525 | RTN2    | 6.185202023 | 4.655708346 |
| FBL         | 151.1377469 | 216.7745071 | RTN3    | 38.58320075 | 35.24851156 |
| NUSAP1      | 33.57877247 | 43.97011435 | RTN1    | 0.806499687 | 0.436302504 |
| SIRPA       | 8.070005898 | 5.8168349   | RTN4    | 80.94408048 | 69.85449209 |
| TBCCD1      | 3.3554325   | 3.501912759 | ENHO    | 3.184305869 | 3.575427443 |
| ANGEL2      | 5.017109321 | 5.253481219 | CHAD    | 0.1         | 0.1         |
| ANGEL1      | 2.955993334 | 4.115301374 | CRIM1   | 33.70028233 | 21.65838102 |
| PAM16       | 12.28720025 | 15.78879973 | FAM175B | 6.246641728 | 6.038537967 |
| GLTPD1      | 39.95754674 | 42.62053197 | FAM175A | 6.545840499 | 7.565903731 |
| GLTPD2      | 0.26722514  | 0.219401822 | RTP4    | 4.91599609  | 1.490116681 |
| TBL1XR1     | 5.047740664 | 6.483595204 | RTP3    | 0.799466397 | 0.190805792 |
| RGS9BP      | 0.656492601 | 0.638339661 | CHD9    | 1.623904125 | 1.532712311 |
| ELMO2       | 13.7792571  | 12.18896207 | CHD8    | 11.77799057 | 10.16906042 |
| RELL1       | 1.392320323 | 1.094509154 | CHD7    | 2.499959691 | 2.844987515 |
| ELMO3       | 0.513624817 | 0.690671436 | CHD6    | 4.407662733 | 3.669516268 |
| RELL2       | 3.941538483 | 3.144507638 | CHD5    | 0.159139403 | 0.188292023 |
| ZC3H18      | 14.22626194 | 16.07421844 | CHD4    | 33.11861869 | 35.67350104 |
| ZC3H13      | 10.35253478 | 11.29926961 | CHD3    | 39.87891499 | 37.03423444 |
| ZC3H14      | 22.76829682 | 21.92842206 | CHD2    | 6.446888174 | 5.039814739 |
| ZC3H15      | 20.96328227 | 28.64199665 | CHD1    | 7.212951743 | 8.804962249 |
| TGFB2       | 1.949793537 | 1.856895341 | FAM178B | 0.152458375 | 0.112485414 |
| TGFB1       | 95.93733441 | 71.0571332  | FAM178A | 4.03591887  | 3.729994576 |
| TGFB3       | 5.028789389 | 3.630175508 | UBE2Q1  | 35.77116846 | 36.07777334 |
| BFAR        | 24.22328438 | 24.68722746 | UBE2Q2  | 7.562336428 | 7.008758516 |

|                  |             |             |                  |             |             |
|------------------|-------------|-------------|------------------|-------------|-------------|
| LOC10192775<br>1 | 0.57661722  | 0.372250761 | LOC10192898<br>7 | 0.1         | 0.1         |
| NFKBIA           | 50.0289235  | 46.16588856 | UBE2R2           | 33.33156622 | 33.82348246 |
| FER              | 1.165379668 | 1.311115517 | CHDH             | 0.113089261 | 0.118691946 |
| DLG1             | 9.223533096 | 8.599435852 | PNKP             | 20.47600927 | 20.42527525 |
| DLG3             | 0.229403712 | 0.186236853 | TGFBRAP1         | 6.051131675 | 6.672906095 |
| DLG4             | 7.022029965 | 6.595554891 | LEPREL1          | 54.45291752 | 38.27720752 |
| DLG5             | 11.15848816 | 8.849045211 | LRWD1            | 23.59388959 | 24.36815785 |
| TGFB1            | 49.79172054 | 36.67841841 | CHFR             | 10.69293029 | 9.449855357 |
| CLASRP           | 13.16906566 | 17.7189002  | PNKD             | 7.140282236 | 7.711808666 |
| NFKB1E           | 3.461434814 | 3.20435486  | FAM179B          | 3.146400135 | 2.629015864 |
| GRSF1            | 15.95724394 | 19.00789951 | LEPREL2          | 37.11917341 | 32.01597606 |
| NFKB1D           | 1.998803983 | 2.829638934 | LEPREL4          | 21.6211385  | 17.84235428 |
| NFKB1B           | 16.25543931 | 18.6388436  | ACIN1            | 31.4815184  | 33.01006168 |
| DHTKD1           | 9.68962617  | 10.21788355 | ABAT             | 0.127900793 | 0.113281119 |
| ZC3H7A           | 10.50327577 | 10.89356565 | ENO1             | 2431.256778 | 2332.319328 |
| ZC3H7B           | 18.81052232 | 16.18790507 | ENO2             | 17.98170243 | 14.36816462 |
| NFKB1Z           | 14.08688226 | 10.38923764 | ENO3             | 0.969932424 | 0.5658608   |
| HIST1H1E         | 0.1         | 0.572537149 | ENO4             | 0.317596972 | 0.307157647 |
| HIST1H1C         | 16.06863022 | 11.90729606 | RNF115           | 23.31680977 | 19.77951145 |
| PALLD            | 7.862282604 | 7.54511684  | RNF114           | 34.25685904 | 31.63079306 |
| CHMP3            | 9.962930403 | 10.04755835 | CYP1B1           | 57.91771919 | 49.01910118 |
| CHMP6            | 8.685697817 | 7.055156158 | RTTN             | 2.517330528 | 2.51642577  |
| CHMP7            | 31.1184164  | 33.51738372 | RNF111           | 5.059341463 | 4.461096073 |
| CHMP5            | 54.03395856 | 41.97877601 | CHGB             | 0.844399896 | 1.568660425 |
| RGS17            | 0.89728786  | 1.511809885 | RNF123           | 10.4065942  | 10.28824336 |
| RGS19            | 14.46641458 | 11.7256018  | RNF126           | 44.62067009 | 48.72707966 |
| RGS14            | 3.578602843 | 3.840463947 | RNF128           | 0.1         | 0.113061326 |
| PALM2            | 0.242497437 | 0.397410764 | ALG10B           | 0.326906511 | 0.368798306 |
| LOC10192778<br>9 | 1.284556804 | 2.033246446 | RNF122           | 3.346954811 | 3.805453566 |
| PALM3            | 3.337574421 | 3.774205482 | RNF121           | 7.107470841 | 7.516091611 |
| DLL1             | 0.633638495 | 0.324133935 | PNPO             | 4.697332182 | 5.51676454  |
| STRN4            | 45.27502346 | 44.8719544  | CHKB             | 3.257259927 | 2.855306389 |
| DLL3             | 2.040270101 | 3.477857348 | CHKA             | 7.998207879 | 8.365307039 |
| STRN3            | 7.24914541  | 7.199025644 | PNO1             | 13.75756523 | 16.88426629 |
| IGFBPL1          | 0.20218009  | 0.277184834 | GPR137B          | 2.567812863 | 1.989222959 |
| PALMD            | 1.208347647 | 1.553262523 | GPR137C          | 1.357969923 | 1.670159714 |
| RGS20            | 5.97382609  | 4.188288148 | CPEB1            | 0.364832338 | 0.226063436 |
| CLASP1           | 6.35315667  | 5.522936058 | RNF103           | 3.856408424 | 3.45003044  |
| CLASP2           | 3.820296049 | 3.904785923 | CYP1A1           | 0.274138359 | 0.251968651 |
| DYX1C1           | 0.673471196 | 0.974774616 | CPEB3            | 0.433021006 | 0.369070369 |
| DLK2             | 3.61435109  | 3.445748322 | CPEB2            | 3.370558728 | 2.483777472 |
| RGS10            | 9.81213032  | 12.61517775 | CPEB4            | 2.580875757 | 2.129221344 |
| RGS12            | 3.321978235 | 2.816672106 | VSIG10L          | 1.217079717 | 0.968290226 |
| RGS11            | 0.68082173  | 0.72975603  | ZCWPW2           | 0.360625135 | 0.451505477 |
| NOC2L            | 76.61680937 | 100.1747612 | RNF157           | 2.99550736  | 2.362204803 |
| FRS2             | 3.511880975 | 4.011632633 | ZCWPW1           | 0.848337857 | 0.705570575 |
| LDOC1            | 70.53462246 | 67.65175704 | ENSA             | 47.8438297  | 56.50502756 |
| FRS3             | 1.721242237 | 1.972582964 | RNF152           | 0.123109999 | 0.112375723 |

|                  |             |             |                  |             |             |
|------------------|-------------|-------------|------------------|-------------|-------------|
| RABL3            | 3.29761916  | 4.102692667 | RNF168           | 3.005074213 | 2.854139512 |
| RABL5            | 9.77882071  | 9.137272969 | RNF167           | 85.8620264  | 96.93323399 |
| RABL6            | 45.2360919  | 45.24524597 | RNF169           | 1.335195899 | 1.598371023 |
| CDCA2            | 29.43284788 | 33.68882117 | RNF166           | 6.453980158 | 5.931495623 |
| CDCA3            | 30.7839946  | 39.44919357 | RNF165           | 0.1         | 0.1         |
| CDCA4            | 21.89285121 | 29.73904024 | CCDC90B          | 6.111881291 | 5.854811857 |
| MF12             | 0.768562989 | 0.914330673 | RNF135           | 4.898889144 | 4.79964224  |
| CDCA5            | 36.42152556 | 45.47411398 | RNF139           | 16.39751714 | 16.57509615 |
| CDCA7            | 9.917127428 | 11.96749302 | RNF138           | 3.286927075 | 4.225037527 |
| CDCA8            | 52.59461294 | 60.30714421 | CHN2             | 0.115115297 | 0.1         |
| FUCA1            | 2.841677675 | 1.940486369 | CHN1             | 2.282653729 | 2.540599122 |
| FUCA2            | 72.1548716  | 67.70804855 | CHML             | 4.768043141 | 5.863321701 |
| FN1              | 159.8615397 | 108.8283496 | RNF130           | 34.48931194 | 36.86633439 |
| MAGOHB           | 5.408139704 | 6.653221183 | AAED1            | 15.56168958 | 16.68442879 |
| PANX1            | 5.707523522 | 5.900889492 | TIMMDC1          | 26.92196255 | 31.24422473 |
| PANX2            | 0.81492583  | 0.622624229 | RNF146           | 10.6195459  | 9.037847732 |
| SPHK2            | 9.493802755 | 8.316225643 | RNF145           | 28.66817526 | 27.57450129 |
| SPHK1            | 1.217999092 | 1.153039516 | ABI2             | 5.757126349 | 5.325186887 |
| FOS              | 1.857387961 | 1.922048941 | RNF149           | 6.086299436 | 5.424162665 |
| SLC7A5           | 113.6655143 | 96.04022728 | ABI1             | 14.6045176  | 13.6331468  |
| SLC7A6           | 5.592646024 | 7.0040904   | RNF141           | 2.529650809 | 2.525108317 |
| SLC7A7           | 0.2432292   | 0.319146315 | CHPF             | 47.88266899 | 31.31565238 |
| SLC7A8           | 0.11226423  | 0.117513771 | HJURP            | 26.36072703 | 29.66831935 |
| NUP62CL          | 0.1         | 0.1         | LOC10272356<br>3 | 0.58676665  | 0.510753118 |
| CACUL1           | 5.657399214 | 5.102759207 | RNF19B           | 16.51926012 | 9.505267986 |
| ELOF1            | 49.24723357 | 59.6909225  | LOC10272356<br>5 | 2.344808264 | 0.634278114 |
| DLST             | 49.89425703 | 53.79648123 | RNF19A           | 17.32278549 | 15.28445105 |
| NOC4L            | 13.02415346 | 15.8968416  | CHP1             | 23.13226893 | 20.92096696 |
| SLC7A1           | 60.5482787  | 57.5775191  | FAM24B           | 1.311299204 | 1.973928084 |
| LOC10272459<br>4 | 1.686689248 | 1.598385038 | LOC10272357<br>2 | 2.127707984 | 2.196843848 |
| MFN1             | 9.681238635 | 11.8744199  | NHP2             | 149.3915644 | 213.6409192 |
| MFN2             | 48.06267404 | 52.69608802 | ENY2             | 32.08075921 | 34.15284341 |
| P4HTM            | 8.451344131 | 4.925653681 | TBXA2R           | 7.709933306 | 5.448063174 |
| TRAPPC10         | 5.041706834 | 4.352258074 | ABL1             | 41.57445084 | 38.20335961 |
| NOC3L            | 7.251616417 | 9.341154321 | ABL2             | 15.29830848 | 11.19154098 |
| RABIF            | 11.56244475 | 11.93978654 | RNF170           | 6.002694252 | 5.422323916 |
| FRK              | 0.133047886 | 0.111798399 | TVP23A           | 0.779554878 | 1.189257416 |
| FRYL             | 4.378236033 | 3.820190594 | TVP23B           | 12.23842022 | 9.617172875 |
| PLOD3            | 108.592136  | 102.8472268 | TVP23C           | 0.800549512 | 0.617756282 |
| PLOD2            | 20.70136846 | 17.64206873 | RNF182           | 17.67962261 | 16.46132844 |
| PLOD1            | 136.7056343 | 131.4042919 | RNF181           | 36.98733793 | 33.43648577 |
| FRY              | 0.1         | 0.103461245 | FAM26F           | 0.375360125 | 0.42768698  |
| ADORA1           | 0.116613776 | 0.1         | RNF185           | 16.27423598 | 15.32628248 |
| SYBU             | 0.934300927 | 0.982103396 | RNF187           | 61.96728835 | 62.12883389 |
| BNIP3L           | 36.70338543 | 34.04646122 | PTBP1            | 154.3713414 | 170.5458613 |
| FST              | 14.80180809 | 5.754438881 | DNMT3B           | 0.878789899 | 1.220695519 |

|              |             |             |              |             |             |
|--------------|-------------|-------------|--------------|-------------|-------------|
| LOC102724549 | 0.380060792 | 0.299968551 | IQCB1        | 7.36997438  | 7.493093258 |
| MFNG         | 0.27081209  | 0.396195784 | CHUK         | 8.889008    | 11.12137002 |
| IL6ST        | 22.52216426 | 20.03345553 | DNMT3A       | 1.929723157 | 1.815506054 |
| FTL          | 2796.999288 | 2089.681244 | KCNAB2       | 0.767286369 | 0.715059738 |
| COL17A1      | 0.618586722 | 0.536401955 | KCNAB3       | 0.415982722 | 0.829938869 |
| CHODL        | 0.385783056 | 0.26032842  | PTBP2        | 2.752704332 | 3.462523382 |
| FTO          | 10.4733095  | 9.65874832  | PTBP3        | 7.0324678   | 6.951936398 |
| DLX1         | 4.765368558 | 4.629753402 | WBP1         | 12.58869618 | 11.17062196 |
| DLX2         | 2.422474622 | 2.901382341 | WBP2         | 37.16606027 | 33.77860252 |
| DLX3         | 0.1         | 0.142768062 | WBP4         | 5.975442039 | 5.919620459 |
| DLX4         | 0.306771252 | 0.450641372 | LOC102723542 | 0.222767886 | 0.143829263 |
| DLX5         | 0.1         | 0.126049274 | MROH1        | 9.451038823 | 6.64723286  |
| DLX6         | 0.1         | 0.1         | RBBP4        | 19.13942683 | 18.91561067 |
| CORO1A       | 2.088822812 | 2.230084038 | LOC102723545 | 0.152055388 | 0.397348025 |
| CORO1B       | 94.42975136 | 77.26431359 | RBBP5        | 7.633382246 | 7.921059133 |
| CORO1C       | 97.90535719 | 97.29705849 | ANKAR        | 0.34705091  | 0.267998941 |
| FUK          | 1.631057785 | 1.73513327  | RBBP8        | 9.216711386 | 10.74585935 |
| SLC14A1      | 1.625875047 | 1.249085001 | WBP5         | 0.624760373 | 0.542813738 |
| FUS          | 67.96446359 | 74.36079605 | RBBP9        | 3.732956432 | 4.452151587 |
| FUZ          | 12.21285037 | 12.39964457 | MROH8        | 0.340654439 | 0.26109221  |
| CORO2A       | 1.333647194 | 0.816509678 | RBBP6        | 6.607839072 | 6.735893305 |
| LOC102724560 | 0.716564606 | 0.377187176 | MROH6        | 2.289272515 | 1.275238116 |
| NDC80        | 22.39216857 | 28.91116866 | RBBP7        | 90.63557521 | 97.26799393 |
| CDC73        | 11.92062041 | 11.29317401 | FDXACB1      | 1.319990849 | 1.890585973 |
| COMMD10      | 5.353499919 | 4.762820046 | SLC46A3      | 1.839474745 | 1.297659177 |
| SYF2         | 22.8158932  | 25.00339913 | SLC46A1      | 1.516416516 | 1.505601491 |
| FXN          | 0.758802425 | 1.376791952 | GOLGA2       | 22.61341184 | 18.4215737  |
| SLC5A10      | 4.171856844 | 3.709162114 | GOLGA3       | 5.917673089 | 4.23839677  |
| RCHY1        | 1.52985166  | 2.025676114 | GOLGA4       | 7.491495405 | 7.400297477 |
| FYB          | 2.609619903 | 1.509026956 | GOLGA5       | 22.95226262 | 21.26453941 |
| EHBP1        | 10.90241497 | 10.96133611 | GOLGA1       | 6.899849649 | 5.50988249  |
| CDC42        | 95.12509075 | 101.5510892 | GOLGA7       | 40.67171754 | 41.53127391 |
| LOC102724516 | 10.13650957 | 10.4675698  | MCCC2        | 18.32678172 | 21.5952313  |
| CDC45        | 13.05177534 | 16.45094374 | ABT1         | 15.26775357 | 17.12333863 |
| FYN          | 10.62485903 | 8.432895654 | MCCC1        | 5.94067611  | 6.757927262 |
| FSD1         | 9.832074626 | 13.97767668 | MTUS1        | 0.10809336  | 0.105778808 |
| GADD45GIP1   | 102.7769668 | 130.7803652 | OVOL1        | 0.1         | 0.1         |
| CDC5L        | 12.58704512 | 12.81074973 | OVOL3        | 0.249500078 | 0.206745802 |
| FSBP         | 0.282690036 | 0.326560704 | MTURN        | 1.342041194 | 2.033184099 |
| STUB1        | 24.12989778 | 26.19558382 | OVOL2        | 0.1         | 0.123854769 |
| CDC20        | 215.1627788 | 255.3521548 | LACE1        | 0.931590027 | 0.949421769 |
| CDC23        | 21.62149572 | 23.21477994 | GUF1         | 4.444315726 | 6.080435408 |
| HYKK         | 1.025447849 | 1.001072863 | TSHZ1        | 2.920271647 | 2.663599225 |
| CDC26        | 7.010949689 | 7.799591832 | GMCL1        | 4.307477675 | 4.226844574 |
| CDC27        | 12.39353097 | 14.28461878 | PINLYP       | 0.327109408 | 0.262160289 |

|              |             |             |          |             |             |
|--------------|-------------|-------------|----------|-------------|-------------|
| ATP6V1E1     | 91.69830414 | 84.97335177 | STK11IP  | 6.64436175  | 5.894676902 |
| ATP6V1E2     | 1.362704649 | 1.049894012 | MEIG1    | 0.183122043 | 0.278051998 |
| ATP6V1G1     | 42.57041079 | 44.86167538 | KNOP1    | 6.651755043 | 8.917038092 |
| ATP6V1G2     | 1.590803956 | 1.326444671 | C21orf91 | 5.32094556  | 3.807368348 |
| CDC40        | 4.320282817 | 5.115847541 | CCDC88B  | 0.532927308 | 0.499591627 |
| PYURF        | 19.29438773 | 24.41911042 | CCDC88A  | 3.620595046 | 3.846083632 |
| CDC34        | 77.75985955 | 73.57644979 | LACC1    | 2.179510385 | 1.862667541 |
| CDC37        | 130.4600864 | 142.416397  | GOLGB1   | 5.366107516 | 4.284967287 |
| TRIB3        | 23.68147279 | 15.15248587 | CCDC88C  | 1.016017478 | 1.309752735 |
| TRIB1        | 13.34864753 | 9.345478557 | CX3CL1   | 0.115872679 | 0.111333384 |
| TRIB2        | 5.792483389 | 5.519383624 | C21orf59 | 18.15734645 | 25.10671889 |
| ZNF324B      | 2.285596293 | 2.490375316 | C21orf58 | 1.444698457 | 1.938315685 |
| OMA1         | 5.515560041 | 4.685763864 | GUK1     | 134.4743536 | 126.1584816 |
| CDKN2AIP     | 5.544761151 | 5.882367183 | FAM21C   | 20.54498048 | 18.17192638 |
| ATP6V1C1     | 46.99641044 | 42.92997518 | FAM21A   | 26.48055448 | 22.4768993  |
| ATP6V1C2     | 0.212240413 | 0.225936984 | B3GNT9   | 24.5487895  | 15.11593788 |
| CDC16        | 41.5160202  | 43.92385354 | POC5     | 7.525043749 | 8.421309248 |
| SLC2A4RG     | 63.47189556 | 60.1440452  | B3GNT7   | 0.14299416  | 0.151164367 |
| SYNM         | 4.613509991 | 4.447406015 | B3GNT5   | 6.110793571 | 6.338795178 |
| DFNB31       | 8.752137172 | 7.614016884 | B3GNT4   | 0.134542072 | 0.1         |
| ZNF587B      | 1.748753102 | 2.132404913 | FAM20B   | 7.500392129 | 8.160151816 |
| GAA          | 4.256102158 | 3.293537485 | B3GNT3   | 0.1         | 0.113637561 |
| SYN3         | 0.1         | 0.1         | B3GNT2   | 9.62471575  | 7.764418475 |
| SYN1         | 1.896446026 | 1.602255951 | FAM20C   | 44.28938658 | 39.66711059 |
| GAK          | 18.23880383 | 16.85827812 | FAM181B  | 0.1         | 0.119932384 |
| GAL          | 4.106525217 | 3.961989023 | ALDOC    | 9.876905304 | 9.158313032 |
| GAN          | 0.477287003 | 0.753066306 | B3GNT1   | 16.28771674 | 18.41412456 |
| DMC1         | 0.984277055 | 0.81031382  | ALDOA    | 547.6751541 | 501.5231074 |
| SYNC         | 27.65960957 | 21.54091655 | MYCBP    | 3.340625464 | 4.669885579 |
| GBA          | 160.0568354 | 116.6098607 | SLC20A2  | 20.33876022 | 19.66903074 |
| DFNB59       | 0.411424549 | 0.302148045 | SLC20A1  | 79.86419797 | 82.53270015 |
| NFIL3        | 22.78787814 | 19.49618653 | C21orf33 | 3.496934127 | 3.259791    |
| ZNF585B      | 2.810501407 | 3.331552963 | FAM184A  | 0.433926626 | 0.567689116 |
| ZNF585A      | 1.691588521 | 1.617043735 | SHOC2    | 8.168440027 | 7.665443063 |
| GCA          | 1.452730089 | 0.74391609  | LBX2     | 1.136865403 | 0.994578644 |
| HYPK         | 10.94401192 | 14.59720188 | FAM183A  | 1.208716277 | 0.495821895 |
| SRP19        | 17.61077612 | 20.01430579 | POGK     | 26.07563849 | 28.76805106 |
| SYS1         | 10.05820624 | 9.24186854  | OVOS2    | 0.133807772 | 0.116092914 |
| GDA          | 0.1         | 0.1         | CIB2     | 1.080829647 | 1.453972082 |
| RPP30        | 4.02796406  | 4.893066416 | CIB1     | 71.04167084 | 73.84874788 |
| SRP14        | 111.799701  | 122.9624955 | POGZ     | 7.666990252 | 6.494293092 |
| RPP38        | 9.118666527 | 10.20642743 | MEIOB    | 0.541199804 | 0.434713814 |
| GEM          | 20.79024337 | 19.19832241 | MRP63    | 27.97152783 | 33.74711612 |
| SPOCD1       | 0.139337161 | 0.193624852 | KIAA2026 | 4.879572341 | 4.20797326  |
| RPP21        | 7.952405658 | 9.096401222 | ILVBL    | 26.77424979 | 24.84455991 |
| RPP25        | 19.02781201 | 19.86341558 | FAM185A  | 0.836244846 | 1.167812578 |
| SYCE3        | 0.1         | 0.1         | RPL7L1   | 32.15417037 | 43.34560726 |
| SYCE2        | 1.330526176 | 1.033531939 | EOGT     | 4.607772341 | 4.810007972 |
| PRR5-ARHGAP8 | 0.1         | 0.119975318 | H6PD     | 6.860519737 | 4.915390437 |

|          |             |             |         |             |             |
|----------|-------------|-------------|---------|-------------|-------------|
| SYT5     | 3.885059687 | 2.421953963 | NID1    | 4.259281226 | 3.473343346 |
| SYT1     | 4.246194369 | 3.675619252 | NID2    | 5.000675355 | 4.466614092 |
| RPP40    | 8.911988753 | 12.84035918 | FAM188B | 1.297559623 | 1.796586451 |
| GGH      | 60.36765688 | 68.69811976 | FAM188A | 6.990379894 | 6.956563769 |
| SYT8     | 0.136508276 | 0.1         | SDCBP   | 224.2886251 | 193.0000256 |
| SYT7     | 0.10735333  | 0.110500826 | FOPNL   | 7.465536602 | 9.497188764 |
| MANBAL   | 48.49567627 | 57.30682053 | HSPA9   | 224.0417139 | 249.9407416 |
| GGN      | 2.185074488 | 0.836555053 | HSPA8   | 1003.372079 | 1155.372171 |
| DMKN     | 0.327634612 | 0.22641634  | HSPA5   | 331.7114131 | 232.4757967 |
| GHR      | 2.366258447 | 2.06489663  | HSPA4   | 91.06461407 | 98.79130297 |
| SGOL2    | 7.065726041 | 9.475628086 | PTCH1   | 0.874332783 | 0.897079959 |
| SGOL1    | 4.483703014 | 5.436322262 | PTCH2   | 0.293397029 | 0.169044516 |
| TGIF1    | 16.82498926 | 13.4914552  | HSPA2   | 5.295127698 | 4.827162693 |
| TGIF2    | 5.612950818 | 6.456234331 | HSPB6   | 1.452156524 | 0.684360152 |
| SPIDR    | 24.73843106 | 25.37451618 | HSPB2   | 0.1         | 0.1         |
| ATP6V1B2 | 59.90199557 | 58.10533213 | HSPB1   | 936.7288197 | 787.4309139 |
| ATP6V1B1 | 0.184336489 | 0.200363004 | POLB    | 13.4408501  | 18.46134692 |
| CASC10   | 2.215662863 | 2.822849805 | ALDH2   | 7.262214884 | 6.672510026 |
| GK5      | 0.861190871 | 0.674076381 | POLI    | 1.421124471 | 1.331848151 |
| SPOCK2   | 0.300326261 | 0.392884529 | POLL    | 7.872238288 | 7.455106679 |
| SPOCK1   | 72.60792479 | 61.0859753  | POLK    | 4.511040873 | 4.183703508 |
| RPP14    | 7.120844003 | 8.462084889 | GUSB    | 19.63819765 | 20.56630299 |
| ATF7IP   | 8.08346675  | 7.226426067 | POLE    | 12.04782023 | 11.3927524  |
| FAHD1    | 11.66501772 | 11.39992174 | POLH    | 2.922364905 | 3.442531855 |
| GLA      | 53.22366122 | 56.68299114 | POLG    | 11.31250582 | 10.74956165 |
| ANKLE2   | 12.04483152 | 11.90722786 | RNF208  | 1.209451597 | 1.374358541 |
| ANKLE1   | 0.826478392 | 1.563940057 | CTPS2   | 3.825398071 | 4.115745956 |
| GLS      | 13.84991442 | 14.19425033 | CTPS1   | 54.73085206 | 57.10372645 |
| CSPP1    | 9.965798979 | 11.78688769 | FAM189B | 46.67700694 | 53.38071141 |
| AP1S2    | 33.54898442 | 30.67487039 | RNF207  | 1.055034807 | 1.043467838 |
| AP1S1    | 50.28885894 | 53.81075102 | PON3    | 0.1         | 0.1         |
| AP1S3    | 0.333663914 | 0.507831912 | PON2    | 64.991982   | 69.08528123 |
| ADPRH    | 0.160426027 | 0.110786323 | POMP    | 68.85904306 | 81.51941125 |
| ADPRM    | 1.505026189 | 1.895877828 | LCAT    | 1.558012205 | 1.688967236 |
| GNE      | 7.275806793 | 7.024616644 | HSPD1   | 100.4226818 | 151.402315  |
| SEH1L    | 9.660220727 | 12.37652861 | NRIP1   | 2.221821998 | 2.23436764  |
| GNS      | 64.72503819 | 52.02315226 | NRIP3   | 1.122931419 | 1.171241344 |
| DMPK     | 27.18899456 | 20.79175042 | PTCD3   | 5.700924723 | 7.602562271 |
| GRTP1    | 0.882202414 | 0.549908331 | POLQ    | 3.224177021 | 3.484103315 |
| SNAI3    | 0.1         | 0.18836152  | PTCD1   | 6.007629316 | 6.622643571 |
| SNAI1    | 0.464783689 | 0.468988195 | PTCD2   | 4.417146266 | 4.90273051  |
| SNAI2    | 34.70958651 | 33.08430117 | NIFK    | 18.30387093 | 26.60802899 |
| GPI      | 69.46599914 | 80.51861866 | POLM    | 3.863515804 | 4.802633993 |
| YJEFN3   | 0.921364063 | 0.598498676 | LCA5    | 0.573385232 | 0.461587549 |
| GPT      | 0.37545746  | 0.336018024 | HSPE1   | 54.99500096 | 94.21720232 |
| TIMP2    | 139.5511569 | 104.3797695 | MEIS3   | 10.82124691 | 6.436491913 |
| TIMP3    | 0.365154166 | 0.275801735 | MEIS2   | 4.105054392 | 4.440589379 |
| TIMP1    | 259.7329852 | 264.5170848 | MEIS1   | 1.152665715 | 1.190382168 |
| TEAD1    | 7.487718763 | 6.907425568 | PMP22   | 128.1497085 | 115.3889077 |
| TEAD2    | 33.99141721 | 34.22420843 | POMK    | 3.364960106 | 3.162611379 |

|          |             |             |                    |             |             |
|----------|-------------|-------------|--------------------|-------------|-------------|
| TEAD3    | 1.802181593 | 1.154163867 | POP5               | 17.56918724 | 21.78868436 |
| TEAD4    | 19.89647546 | 24.0097216  | POP7               | 59.79937515 | 76.39776455 |
| NUTF2    | 48.77928138 | 56.45643241 | POP1               | 11.26760854 | 16.3291863  |
| GCHFR    | 2.650202937 | 2.753299404 | POP4               | 14.59989381 | 15.48678597 |
| TMSB15A  | 0.256009841 | 0.54557557  | ATP5C1             | 114.0036273 | 138.0722035 |
| CACTIN   | 13.04124224 | 12.20548926 | F11R               | 2.337239257 | 2.357905767 |
| MGLL     | 0.111191572 | 0.115981976 | ACCS               | 0.554244944 | 0.407268749 |
| GRN      | 157.4530522 | 107.7211756 | HDGFRP3            | 5.265246108 | 6.759881109 |
| SGMS1    | 13.74880338 | 13.14670913 | HDGFRP2            | 35.27393818 | 36.47155255 |
| TIMM9    | 23.37687085 | 30.27772146 | CCDC169-<br>SOHLH2 | 0.492085109 | 0.561927352 |
| SGMS2    | 1.417332974 | 1.439461947 | ACHE               | 2.26097635  | 1.341908167 |
| APOLD1   | 1.97498277  | 2.010294754 | MTMR10             | 2.173443427 | 1.77488273  |
| SCAF8    | 7.950771231 | 8.007892789 | MTMR12             | 13.14499051 | 13.95795452 |
| GPNMB    | 1.329836542 | 0.698722194 | MTMR11             | 9.258252394 | 6.405619014 |
| GSN      | 38.75835898 | 28.89590493 | MTMR14             | 25.79787919 | 22.66500564 |
| DMTN     | 0.437224301 | 0.568191784 | PCMTD2             | 3.765274142 | 3.997163164 |
| MGMT     | 11.51696047 | 12.09329167 | CHAF1B             | 8.921914958 | 10.02867107 |
| GSS      | 48.07438659 | 42.81939583 | CHAF1A             | 25.16652999 | 29.44910844 |
| GSR      | 25.63203176 | 29.90906902 | NINL               | 2.591691578 | 2.1463322   |
| SCAF1    | 36.65454062 | 29.92696815 | PCMTD1             | 4.192306682 | 4.743391577 |
| SLC8B1   | 6.345431669 | 4.851274473 | EPS15L1            | 8.756113303 | 9.417837752 |
| SCAF4    | 7.425994083 | 8.30259847  | SETSIP             | 0.400585981 | 0.672330433 |
| RAB3B    | 2.126439564 | 1.795287725 | CINP               | 19.41589869 | 27.49436378 |
| ANKRD13C | 8.002241177 | 8.164233762 | POT1               | 5.19374729  | 5.520232754 |
| ANKRD13B | 2.834277736 | 3.735766051 | CIPC               | 2.979544101 | 3.828185515 |
| RAB3A    | 1.865166639 | 1.805194847 | NIP7               | 12.88628412 | 16.68045273 |
| ANKRD13D | 10.7566722  | 10.54577059 | ATP5A1             | 190.8564382 | 224.1435068 |
| RAB3D    | 3.941938573 | 3.581104759 | LOC10065275<br>8   | 0.851635497 | 1.331210622 |
| SYAP1    | 18.83193561 | 19.88355529 | GOLM1              | 40.56075814 | 48.31761108 |
| SLC8A1   | 6.459231627 | 4.623255567 | TTC30B             | 1.415968075 | 1.095722419 |
| RAB43    | 2.405160487 | 1.681062821 | TTC30A             | 0.878879715 | 0.648189648 |
| BZRAP1   | 0.106748672 | 0.1         | YPEL1              | 1.082042809 | 1.026272061 |
| RAB41    | 0.43955083  | 0.792701516 | YPEL5              | 18.74052315 | 14.89797841 |
| SLC39A9  | 11.04013614 | 9.55309564  | CRLF3              | 3.208950951 | 3.694640381 |
| SLC39A6  | 25.70250777 | 28.63791514 | CRLF1              | 0.215191301 | 0.202810882 |
| SLC39A8  | 10.98684848 | 12.07377864 | YPEL3              | 4.352938291 | 4.374705548 |
| SLC39A7  | 17.57375062 | 15.66020157 | YPEL2              | 0.169506678 | 0.142539181 |
| SLC39A1  | 117.7377608 | 120.4582543 | SLC27A1            | 1.553545596 | 1.017392568 |
| ANKRD13A | 8.809439738 | 8.508516585 | CIR1               | 6.966956298 | 6.84439385  |
| SLC39A4  | 10.09580221 | 13.79827707 | CISH               | 0.133100527 | 0.182720345 |
| SLC39A3  | 28.7201777  | 25.97647292 | ATXN2L             | 36.40612589 | 32.91825394 |
| RAB2A    | 79.81222955 | 76.90594271 | ACLY               | 74.48264203 | 79.03860522 |
| RAB2B    | 3.826013717 | 3.647256328 | SLC27A3            | 2.748158752 | 1.821735023 |
| RAB32    | 77.91895354 | 67.41219016 | SLC27A5            | 7.063448119 | 10.1852215  |
| RAB30    | 1.056317039 | 1.236816237 | SLC27A4            | 19.6223666  | 20.36483546 |
| RAB31    | 22.44659335 | 24.30315399 | HSP90B1            | 337.8559087 | 360.7377267 |
| RAB36    | 3.049614627 | 3.535723398 | IGSF23             | 0.178773733 | 0.1         |
| DMWD     | 24.30100297 | 20.0151267  | ACN9               | 2.474049604 | 3.526296341 |

|              |             |             |        |             |             |
|--------------|-------------|-------------|--------|-------------|-------------|
| RAB34        | 37.96030208 | 39.50467483 | DMXL1  | 2.772690586 | 2.925138511 |
| RAB35        | 29.47143503 | 28.56615129 | DMXL2  | 1.854287563 | 1.422182079 |
| RAB38        | 0.761416721 | 0.765462472 | LCN2   | 0.289603201 | 0.190253446 |
| RAB5B        | 27.78789031 | 25.41989433 | ACO1   | 10.9148158  | 15.38009275 |
| RAB5C        | 94.47543889 | 88.93994657 | ACO2   | 37.91203851 | 36.76110769 |
| RAB6A        | 42.18846119 | 38.79417862 | NIT1   | 15.78063931 | 13.75525722 |
| RAB6B        | 3.210910849 | 3.295127782 | NIT2   | 28.26241529 | 35.26795456 |
| AP1M2        | 1.939508379 | 2.811623798 | MCFD2  | 24.99432144 | 23.58839662 |
| AP1M1        | 72.54063464 | 69.37036887 | ACP6   | 1.680376235 | 1.577201308 |
| RAB4A        | 6.037777704 | 7.78518792  | ACP2   | 33.39786795 | 24.1278598  |
| RAB4B        | 4.163472463 | 3.656547472 | ACP1   | 20.65113164 | 26.28281538 |
| P4HA1        | 22.40516783 | 19.89447522 | EIF5A  | 675.8116645 | 818.5807235 |
| P4HA2        | 30.37532656 | 21.98471307 | EIF5B  | 18.92100328 | 24.48203175 |
| P4HA3        | 5.807693603 | 3.960903454 | ACPT   | 0.215704403 | 0.292768495 |
| CSPG5        | 1.871321054 | 2.293310646 | LCOR   | 0.945509034 | 0.800159531 |
| CSPG4        | 3.408838871 | 2.726571236 | LCP1   | 0.195952227 | 0.168511653 |
| RAB5A        | 21.84371001 | 19.42993827 | MGRN1  | 6.747451296 | 6.388409874 |
| ADPGK        | 14.30601297 | 12.22385085 | ACRC   | 0.541373341 | 0.718625175 |
| AP1G2        | 0.745500668 | 0.816040039 | ATXN1L | 5.357052882 | 4.82731892  |
| AP1G1        | 10.84670941 | 10.03690437 | EIF4H  | 120.28579   | 128.7931539 |
| LOC102724614 | 1.147080001 | 0.560082681 | EIF4E  | 5.121313016 | 6.267039193 |
| CHPF2        | 31.27337157 | 20.82362142 | EIF4B  | 78.48240948 | 104.5481902 |
| LOC102724620 | 1.894113169 | 1.826605332 | NTRK2  | 0.193102647 | 0.11661925  |
| RAB1A        | 39.78582225 | 39.21518771 | CIZ1   | 55.74799972 | 56.77359797 |
| RAB1B        | 188.7190097 | 172.5546682 | NTRK3  | 5.186843407 | 2.698209894 |
| RAB21        | 11.25360495 | 11.76341121 | TTC39C | 0.69486195  | 0.701718344 |
| FBXL20       | 0.56541458  | 0.471620584 | TTC39A | 0.189263363 | 0.125494272 |
| RAB20        | 1.098400949 | 1.304515668 | TTC39B | 2.218834664 | 1.294384375 |
| MSTO1        | 10.85340995 | 11.40831862 | EIF3M  | 68.35885271 | 82.38362123 |
| RAB25        | 0.1         | 0.1         | MCM3AP | 8.497878081 | 8.835805411 |
| RAB26        | 0.419897026 | 0.853760766 | EIF3K  | 200.9900915 | 246.7192345 |
| RAB23        | 6.40461021  | 5.575549855 | EIF3L  | 148.9973921 | 185.0424239 |
| RAB24        | 11.08914994 | 12.28318454 | EIF3I  | 289.3952111 | 335.7538644 |
| RAB28        | 7.472434115 | 7.514736695 | EIF3J  | 15.65695002 | 22.85244204 |
| RNGTT        | 5.546504844 | 7.601673805 | EIF3G  | 175.4989431 | 198.9997748 |
| FBXL19       | 12.45827268 | 13.27253319 | EIF3H  | 332.1807116 | 426.9302054 |
| FBXL17       | 2.759432593 | 2.348331082 | EIF3E  | 311.6354096 | 433.7918062 |
| LOC102724641 | 33.23219195 | 32.03694154 | ATXN10 | 31.2551652  | 29.93128439 |
| FBXL18       | 3.951048603 | 4.152455388 | EIF3F  | 68.80308205 | 73.84532877 |
| FBXL15       | 3.201240497 | 3.460775428 | EIF3C  | 22.1872607  | 25.09873714 |
| LOC102724642 | 0.768057268 | 0.520886908 | EIF3D  | 149.3966148 | 173.7136397 |
| FBXL16       | 3.179245883 | 2.748835462 | EIF3A  | 51.64976852 | 54.10854657 |
| FBXL14       | 5.095788359 | 4.457817722 | EIF3B  | 127.8051332 | 152.7345554 |
| FBXL12       | 11.81540271 | 10.49487887 | PPAN   | 17.6576075  | 24.59331227 |
| RAB10        | 34.97666969 | 35.54771441 | LCTL   | 1.336069571 | 1.294073929 |
| TNRC6C       | 0.647639088 | 0.517598841 | ACTB   | 6551.024432 | 5423.753241 |



|          |             |             |                  |             |             |
|----------|-------------|-------------|------------------|-------------|-------------|
| RAB14    | 24.93849731 | 24.77276421 | PPAT             | 6.258955061 | 7.803325355 |
| VAPA     | 19.1007673  | 20.76326443 | EPC1             | 6.617319534 | 5.457749068 |
| PSAT1    | 72.77652045 | 75.60372831 | PIEZO1           | 11.20131128 | 9.595141248 |
| RAB15    | 4.642104581 | 3.681656316 | EIF2D            | 0.14954819  | 0.117689159 |
| VAPB     | 6.519473827 | 6.739477281 | EPC2             | 4.92694965  | 4.715889368 |
| RAB12    | 11.52053329 | 11.13456019 | EIF2A            | 20.52425816 | 28.59719392 |
| RAB13    | 76.62542129 | 69.32599378 | CIRBP            | 11.77032976 | 11.50222148 |
| RAB18    | 12.99085714 | 13.22506744 | ISLR2            | 4.586554125 | 2.987754269 |
| RAB17    | 0.151977266 | 0.1         | CSNK1D           | 31.35843818 | 28.4944526  |
| TNRC6A   | 5.398113499 | 5.255863821 | CSNK1E           | 51.62331158 | 56.4985442  |
| TNRC6B   | 1.472673237 | 1.325649692 | PPA2             | 31.33908227 | 39.94352458 |
| PANK4    | 14.33645894 | 15.64248371 | PPA1             | 64.62013431 | 82.74990482 |
| PANK2    | 10.62816426 | 11.82026746 | CSNK2B           | 87.85522548 | 94.7761036  |
| PANK3    | 12.15600936 | 12.23473166 | EIF1B            | 28.28305441 | 31.80598196 |
| TRAF3IP3 | 0.512311722 | 0.508886311 | PPCS             | 9.340428339 | 8.772720542 |
| CALML5   | 0.1         | 0.1         | XRRA1            | 3.80857946  | 3.400720645 |
| VAR5     | 10.3111965  | 11.88017651 | IFFO2            | 7.204904717 | 7.13740222  |
| TRAF3IP2 | 5.309051262 | 5.807694496 | RAB27A           | 1.196398734 | 1.268911279 |
| PANK1    | 1.075575872 | 1.08371857  | RAB27B           | 25.20397277 | 25.67871319 |
| TRAF3IP1 | 2.637849737 | 2.835872409 | NT5C1B-<br>RDH14 | 1.267248678 | 1.493208119 |
| CALML4   | 0.346586428 | 0.676220057 | IGSF9B           | 0.1         | 0.1         |
| KAT5     | 23.26866555 | 20.858099   | ACY1             | 5.115558325 | 4.653872605 |
| FTH1     | 4552.198548 | 4046.986001 | RAB22A           | 6.171291298 | 5.434081924 |
| LONP1    | 68.80086159 | 68.41856261 | ERMARD           | 7.044336977 | 6.182966157 |
| KAT8     | 5.144089975 | 5.00383656  | EPG5             | 6.30240478  | 3.92393003  |
| LONP2    | 7.224050138 | 6.579019428 | PBRM1            | 6.988809531 | 7.014875331 |
| KAT7     | 12.80996683 | 12.41046107 | FAM177A1         | 10.48706428 | 10.88875165 |
| ATP6V0E1 | 396.9794833 | 322.9706505 | LOC10192698<br>0 | 0.524835209 | 0.815016054 |
| ESCO1    | 2.52595806  | 2.263227681 | EPGN             | 0.137550616 | 0.153623659 |
| TINF2    | 19.46212273 | 16.29604439 | SLX4IP           | 0.949239069 | 1.391836633 |
| AP1B1    | 50.409925   | 48.59409661 | SCNN1G           | 0.1         | 0.110601362 |
| AP1AR    | 7.549684491 | 7.205038019 | SCNN1D           | 0.780435848 | 0.597989788 |
| ESCO2    | 6.812371005 | 8.713709323 | SCNN1B           | 0.1         | 0.114283468 |
| KARS     | 62.87742088 | 82.39052368 | SCNN1A           | 0.144772718 | 0.131968543 |
| DNA2     | 2.643149612 | 3.551761439 | HHIPL2           | 1.331168569 | 1.613165287 |
| ATP6V0D1 | 81.853267   | 69.49052403 | PPIF             | 42.51577059 | 48.39952464 |
| TWIST2   | 39.4895916  | 29.44196169 | ANKS6            | 2.549640456 | 3.432091043 |
| TWIST1   | 38.82500328 | 39.61565397 | PPIE             | 7.935430257 | 8.551298829 |
| SPHAR    | 0.886439634 | 1.090939435 | PPIH             | 16.5137025  | 22.44916698 |
| MYL12A   | 272.7068228 | 239.5369571 | PPIG             | 5.554394899 | 6.765539904 |
| MYL12B   | 245.8675532 | 237.0683904 | PPIB             | 364.1126927 | 384.7895969 |
| DND1     | 11.08657698 | 10.5594904  | PPIA             | 403.429993  | 483.3020381 |
| ATP6V0A2 | 2.672946154 | 2.407753842 | PPID             | 10.38261371 | 13.16588405 |
| TNRC18   | 18.49326804 | 17.43306668 | PPIC             | 26.45392449 | 22.93872205 |
| ATP6V0A4 | 0.11491567  | 0.142600248 | HIGD1A           | 29.80665259 | 37.10578661 |
| ATP6V0A1 | 13.65523302 | 11.51565577 | NCKIPSD          | 19.54709468 | 17.47243449 |
| VASP     | 66.04252005 | 61.38390178 | HIGD2A           | 206.0345218 | 245.9778609 |
| VAT1     | 190.6884773 | 165.3425401 | CUEDC2           | 36.89704252 | 40.12024666 |

|          |             |             |          |             |             |
|----------|-------------|-------------|----------|-------------|-------------|
| VASN     | 1.91440668  | 1.19722587  | LDB1     | 20.41522079 | 22.66256581 |
| LOC81691 | 3.679745193 | 3.349592812 | C12orf5  | 1.299506942 | 1.393720463 |
| FUBP3    | 15.57110786 | 17.10933847 | C12orf4  | 6.888082538 | 7.685897822 |
| FUBP1    | 46.95342282 | 49.95332458 | NGLY1    | 17.45722464 | 17.89488389 |
| COL18A1  | 10.8546096  | 9.09233471  | ADAR     | 125.3714846 | 78.7053575  |
| DNER     | 6.371624207 | 4.58939175  | ADAL     | 1.00269539  | 0.868491302 |
| RALGPS1  | 0.252963624 | 0.283947516 | EPN1     | 125.2978178 | 117.2103231 |
| RAB8A    | 51.14445634 | 52.6316097  | EPN2     | 13.8426439  | 13.56437676 |
| GABPA    | 3.991331171 | 4.525520212 | EPN3     | 0.152917012 | 0.1         |
| RALGPS2  | 10.22882228 | 8.607567292 | CUEDC1   | 8.780600534 | 8.149982063 |
| RAB8B    | 3.498084346 | 3.248858888 | AGPAT5   | 21.93609451 | 26.55360855 |
| VAV3     | 2.213346138 | 3.242386902 | AGPAT6   | 46.55152214 | 45.88278386 |
| VAV1     | 0.1         | 0.125259902 | AGPAT9   | 2.067996149 | 1.846249824 |
| VAV2     | 8.856312543 | 8.888065647 | ANKS3    | 3.840024439 | 3.744046321 |
| CDCP1    | 126.2612126 | 97.10649081 | PPOX     | 1.921820799 | 2.135143732 |
| RAB7B    | 4.872969725 | 4.160057989 | ADD3     | 0.12306383  | 0.1         |
| RAB7A    | 182.7673932 | 174.4525526 | AGPAT1   | 15.66581792 | 13.81925353 |
| ZNF2     | 1.198667489 | 1.491498177 | AGPAT2   | 19.76631028 | 14.98079922 |
| ZNF3     | 9.777198652 | 10.60875972 | ADD1     | 27.87214575 | 27.89918066 |
| ZNF8     | 3.414538486 | 3.104459613 | AGPAT3   | 10.38722464 | 9.041080481 |
| ZNF7     | 11.49249463 | 12.5093923  | ADD2     | 0.137837784 | 0.1         |
| PSMC3IP  | 12.33262653 | 13.53248735 | AGPAT4   | 3.370444648 | 3.287301752 |
| DUOX1    | 0.1         | 0.1         | C10orf12 | 1.071586038 | 0.777407215 |
| UBTD2    | 12.21334916 | 12.36629641 | C10orf10 | 15.96279282 | 11.35429799 |
| UBTD1    | 34.13359185 | 28.0457013  | C10orf11 | 0.602430145 | 0.315246612 |
| ATP6V0E2 | 37.82039912 | 43.81861023 | SSRP1    | 91.02853685 | 109.9502406 |
| GABRE    | 1.978948469 | 2.630217553 | EPOR     | 7.339587092 | 7.006048775 |
| GABRD    | 0.1         | 0.1         | ACKR3    | 4.225469926 | 2.481223221 |
| HDX      | 1.264495869 | 0.919760578 | ARPC5L   | 14.29490416 | 17.23404245 |
| GABRP    | 0.11569525  | 0.144826787 | EPRS     | 48.94352362 | 52.74930704 |
| FAM189A2 | 0.1         | 0.1         | EPS8     | 49.76043184 | 42.19215525 |
| PLAC8L1  | 0.200778423 | 0.351851759 | C10orf35 | 0.596593089 | 0.672777566 |
| VAX2     | 0.734104514 | 0.585102435 | C10orf32 | 0.974744294 | 0.907388422 |
| CAPZA1   | 102.1254823 | 104.5458    | C10orf25 | 0.342611817 | 0.296326533 |
| CAPZA2   | 34.91793987 | 35.16311888 | ANAPC13  | 30.7292545  | 32.07911829 |
| RAB9A    | 20.50670571 | 18.67431816 | ANAPC15  | 28.5878809  | 27.92062463 |
| RAB9B    | 0.1         | 0.118196795 | ANAPC16  | 11.90512346 | 11.79261332 |
| HFE      | 1.891423344 | 1.326900641 | ADH5     | 50.66042454 | 53.55923949 |
| FAIM3    | 0.217841523 | 0.160100723 | ANAPC10  | 3.110318917 | 3.313055015 |
| TRAPPC12 | 16.87507557 | 15.67837407 | ANAPC11  | 38.55971432 | 36.81884577 |
| TRAPPC11 | 6.956108358 | 6.771085221 | LDHB     | 309.849784  | 437.4447987 |
| TRAPPC13 | 9.191054914 | 9.221124328 | LDHA     | 586.5521592 | 632.7124392 |
| NANOS1   | 1.144190352 | 1.174263728 | LDHD     | 0.225365051 | 0.171610359 |
| SZT2     | 4.689729384 | 3.403686736 | C10orf54 | 0.927041695 | 0.56620234  |
| TRAPPC2L | 14.0358777  | 14.05391831 | C10orf55 | 2.808164458 | 3.376921962 |
| NANOS3   | 0.411832395 | 0.500777306 | EPT1     | 2.586043393 | 2.965682908 |
| KAZN     | 0.498950061 | 0.401949133 | RMDN3    | 9.354758804 | 9.196392594 |
| HGS      | 53.99158375 | 48.57703278 | RMDN2    | 0.567561493 | 0.526582911 |
| SEPSECS  | 1.011102997 | 0.888538519 | RMDN1    | 14.46120483 | 15.34202194 |
| HAPLN3   | 0.362463035 | 0.474806857 | FOSL2    | 37.52772382 | 31.74961778 |

|              |             |             |              |             |             |
|--------------|-------------|-------------|--------------|-------------|-------------|
| HK2          | 12.258342   | 11.96092893 | FOSL1        | 192.6124958 | 179.6775731 |
| HK1          | 95.60175462 | 92.62954469 | ADI1         | 20.54991175 | 21.21838324 |
| AXIN1        | 10.15874193 | 10.75180174 | TOLLIP       | 19.06363553 | 14.94780149 |
| AXIN2        | 3.302475978 | 2.684501422 | PPT1         | 80.72406642 | 86.93945771 |
| DNM1         | 0.443610583 | 0.458580085 | PPT2         | 4.570690456 | 4.529306145 |
| DNM2         | 51.83871038 | 49.97374388 | GMEB1        | 4.786028324 | 4.836597314 |
| DNM3         | 0.445889703 | 0.380869666 | GMEB2        | 11.2059737  | 10.88462218 |
| TRAPPC6A     | 2.02174884  | 2.752850355 | ARPC1B       | 190.1778156 | 170.9658935 |
| TRAPPC6B     | 4.487410141 | 4.561041172 | ARPC1A       | 104.6491162 | 115.5374145 |
| DNLZ         | 15.61611472 | 17.16331644 | C10orf76     | 5.99059834  | 5.282871792 |
| HLF          | 0.434032143 | 0.550509609 | SHPRH        | 1.33238203  | 1.500829452 |
| RNF113A      | 12.71731091 | 12.0547891  | TP53TG5      | 0.296042555 | 0.519933957 |
| HLX          | 8.329228165 | 7.196558338 | LDLR         | 49.36719321 | 42.62771739 |
| LEPROTL1     | 26.70778898 | 32.72152888 | ORAOV1       | 2.997598914 | 3.533558103 |
| FLJ22184     | 0.1689924   | 0.132841227 | C10orf90     | 1.218646876 | 1.133656309 |
| HN1          | 38.2368572  | 46.73451406 | C10orf91     | 0.170394684 | 0.200526196 |
| MAPKBP1      | 3.331727713 | 2.96520456  | C10orf95     | 0.170730125 | 0.302010435 |
| LOC102724378 | 1.968317385 | 1.649176314 | ADM5         | 0.19839257  | 0.293198782 |
| HPD          | 0.127357176 | 0.158600578 | ADM2         | 5.498166856 | 3.589785818 |
| GIGYF2       | 9.172205647 | 9.105385326 | C10orf88     | 2.994596579 | 2.983900188 |
| FIGNL1       | 7.564564457 | 8.043416058 | RPL10A       | 387.8198223 | 551.250177  |
| GPR17        | 0.139977897 | 0.171362382 | TTC21A       | 0.771520619 | 0.623066973 |
| EXOC6B       | 2.653821916 | 2.62384189  | AAGAB        | 11.50318101 | 10.97089798 |
| LOC100129361 | 1.704859161 | 2.112029883 | ADNP         | 13.92029151 | 14.46095429 |
| GPR19        | 1.858534332 | 2.057925007 | BRSK1        | 2.005548769 | 1.949934285 |
| GPR27        | 0.1         | 0.132884899 | SLC26A2      | 2.1523167   | 2.089074174 |
| HRK          | 0.1         | 0.120170835 | BRSK2        | 1.625634695 | 2.229886377 |
| LOC102724336 | 0.403365121 | 0.803976876 | SLC26A1      | 0.827122531 | 0.433204334 |
| SH3BGRL2     | 0.469003904 | 0.738728647 | HSPBP1       | 28.82567988 | 30.83683266 |
| SH3BGRL3     | 468.9660988 | 356.5366784 | TTC21B       | 1.361551915 | 1.657724707 |
| GPR39        | 2.862386227 | 1.940901547 | SRGAP3       | 1.207196374 | 1.093372002 |
| GPR37        | 2.387762656 | 1.714058083 | SRGAP2       | 11.63809427 | 9.65996755  |
| GPR35        | 0.1         | 0.148979973 | SRGAP1       | 3.77380377  | 2.769929668 |
| MANEAL       | 1.372424559 | 1.50173896  | SLC7A6OS     | 7.498831343 | 8.41146142  |
| LOC102724342 | 0.470673217 | 0.486821711 | SLC26A6      | 10.08697196 | 8.561979321 |
| HTT          | 4.842120273 | 4.276018559 | WDR1         | 264.9969662 | 223.8806188 |
| SRPX2        | 3.373642111 | 2.708448215 | WDR3         | 16.72923258 | 23.46444514 |
| MICALL1      | 120.1600368 | 96.27250558 | WDR4         | 9.642071281 | 12.2796718  |
| AP2S1        | 112.2496789 | 116.7503368 | WDR5         | 20.12119793 | 23.89494607 |
| MICALL2      | 1.18965247  | 1.332881289 | WDR6         | 42.35386791 | 40.14671896 |
| SRSF10       | 31.67188439 | 38.17579884 | WDR7         | 2.853802927 | 2.692822107 |
| SRSF11       | 33.82852726 | 39.13413423 | ADSL         | 59.61989752 | 72.08401449 |
| SRSF12       | 0.376263105 | 0.287394086 | RPL13A       | 660.9501558 | 918.7538292 |
| GPR56        | 0.570595596 | 0.356431661 | TFDP1        | 103.5910199 | 125.6828523 |
| FAM92A1      | 9.661295762 | 11.98829351 | LOC100287387 | 0.961350821 | 0.883849415 |

|              |             |             |             |             |             |
|--------------|-------------|-------------|-------------|-------------|-------------|
| LOC102724369 | 0.471611423 | 0.365337383 | TFDP2       | 2.210946221 | 2.796601514 |
| SH2D6        | 1.262220961 | 0.846862406 | ARPC4-TTLL3 | 10.09413831 | 9.645677074 |
| SH2D5        | 3.97534304  | 3.679770862 | ADSS        | 10.87494134 | 12.56694658 |
| AP2M1        | 229.515768  | 247.5027918 | CISD1       | 7.957716201 | 9.405308616 |
| SLC38A1      | 22.35276533 | 22.39527409 | CISD2       | 4.226476175 | 4.078871864 |
| GPR75        | 0.244375943 | 0.340536511 | PPP2R2A     | 34.97592071 | 39.36897642 |
| SLC9B1       | 1.0388785   | 1.251672444 | CISD3       | 5.480386424 | 5.883650341 |
| SLC9B2       | 4.350699544 | 5.132710436 | RPL18A      | 328.6860201 | 468.5036811 |
| SLC9A2       | 0.1         | 0.1         | PPP2R1B     | 8.534551659 | 7.637958122 |
| SLC9A3       | 1.465661944 | 1.128538277 | PPP2R1A     | 176.5562704 | 172.2944015 |
| SLC9A5       | 0.684191066 | 0.556849168 | SEPHS1      | 28.17918713 | 35.41910792 |
| SLC9A6       | 11.44201774 | 10.77232198 | SEPHS2      | 25.15859128 | 25.23441375 |
| SLC9A7       | 1.058701869 | 1.13234637  | ATP5SL      | 33.40510759 | 38.19897429 |
| SLC9A8       | 5.813817151 | 4.150377257 | ICOSLG      | 0.288742151 | 0.268456704 |
| SNRNP200     | 39.88205556 | 43.3756708  | GPR37L1     | 0.184507974 | 0.1         |
| GPR87        | 0.1         | 0.1         | MAPK8IP2    | 8.254064876 | 4.367372863 |
| SLC9A1       | 10.89122898 | 8.610850442 | MAPK8IP3    | 5.542724026 | 4.660929626 |
| LOC102724315 | 0.516165103 | 0.397149529 | MAPK8IP1    | 23.66853564 | 21.89354599 |
| SLC38A7      | 9.538048701 | 7.038908713 | ZFAND2A     | 11.17063838 | 10.68068891 |
| HYI          | 11.27442561 | 9.238562772 | ZFAND2B     | 15.25736426 | 14.09092133 |
| SLC38A6      | 8.839215847 | 7.357554252 | NKAP        | 10.55580906 | 11.80162971 |
| SLC38A9      | 3.555102934 | 3.680277263 | GFRA1       | 1.598437919 | 1.104011813 |
| SLC38A2      | 170.5265683 | 142.567725  | CNEP1R1     | 4.267598983 | 3.144150106 |
| SLC38A4      | 0.765205907 | 0.62153485  | NKD2        | 0.1         | 0.117919887 |
| NFKB1        | 11.39320293 | 11.36899883 | SPTSSB      | 0.1         | 0.1         |
| NFKB2        | 28.58499466 | 22.55630435 | SPTSSA      | 18.51051568 | 20.60865304 |
| GNL3L        | 2.736422687 | 3.502077151 | KANSL1L     | 1.713274405 | 2.088411865 |
| UBLCP1       | 12.02359994 | 13.21942499 | SH3BGR      | 1.370202371 | 1.006947828 |
| NFE2L3       | 3.949798213 | 2.498975985 | MYEF2       | 2.901294347 | 3.305668682 |
| NFE2L1       | 45.87979783 | 33.92920982 | RAB11A      | 14.58185323 | 16.00180019 |
| NFE2L2       | 44.09936523 | 41.1699332  | RAB11B      | 58.9717356  | 55.20612777 |
| VBP1         | 43.85323794 | 52.97707265 | ALG1L       | 0.448147053 | 0.790509422 |
| GIGYF1       | 8.070404478 | 7.320731984 | ITPRIP      | 7.210969326 | 7.225740837 |
| L3MBTL4      | 0.1         | 0.1         | HRASLS2     | 0.1         | 0.1         |
| GTF3C1       | 15.9697372  | 16.68720418 | ALG14       | 6.489466421 | 9.470049545 |
| GTF3C2       | 14.50802058 | 17.05580487 | ALG13       | 4.444527743 | 4.439416198 |
| GTF3C3       | 5.989165222 | 6.735838419 | ALG12       | 11.86833137 | 11.39224511 |
| GTF3C4       | 8.861570768 | 9.963632392 | ALG11       | 3.279863737 | 2.818792686 |
| GTF3C5       | 33.22275154 | 35.43745615 | ALG10       | 0.880597832 | 1.179146139 |
| GTF3C6       | 35.75498167 | 45.78439413 | ATP5J2      | 247.6564764 | 303.0961832 |
| MICALCL      | 0.171008067 | 0.131688165 | FBLN1       | 1.21059737  | 1.018857866 |
| SH2B3        | 4.918989049 | 4.867279986 | FBLN2       | 363.1011842 | 345.008537  |
| SH2B2        | 1.885028258 | 2.102853238 | SCUBE3      | 0.293748332 | 0.200177146 |
| SH2B1        | 6.036068639 | 5.878334969 | UAP1L1      | 16.4495995  | 14.29830194 |
| SLC12A2      | 6.063220502 | 4.240021723 | RPRD1B      | 10.87398642 | 11.39494368 |
| SLC12A4      | 12.80162386 | 8.009270269 | RPRD1A      | 7.791730291 | 8.833921849 |
| SLC12A5      | 0.520137411 | 0.540795505 | RHBDD3      | 16.18643602 | 13.6572587  |
| AHCYL2       | 2.519199165 | 2.654432517 | RHBDD2      | 67.0723331  | 53.3315111  |

|          |             |             |         |             |             |
|----------|-------------|-------------|---------|-------------|-------------|
| AHCYL1   | 22.84825271 | 23.78042041 | RHBDD1  | 4.731315389 | 3.960381247 |
| SLC12A6  | 1.54718543  | 1.310320356 | CRLS1   | 9.321187468 | 10.37944529 |
| SLC12A7  | 5.878893932 | 3.135231546 | SOWAHB  | 0.135570885 | 0.112699133 |
| SLC12A8  | 8.432925623 | 8.660192194 | SOWAHC  | 2.611610941 | 2.793989722 |
| SLC12A9  | 23.06397026 | 19.82307567 | SOWAHD  | 1.995078028 | 0.963197578 |
| PAQR8    | 1.569284743 | 1.376139529 | ATP5G3  | 35.67550245 | 47.16329374 |
| PAQR9    | 1.851443811 | 1.262495236 | ATP5G2  | 110.0724626 | 139.426198  |
| PAQR6    | 0.401541409 | 0.315306105 | ATP5G1  | 84.49071422 | 118.7783987 |
| PAQR7    | 6.183609676 | 4.57878619  | PPP2R5E | 10.32344516 | 11.60451517 |
| PAQR4    | 15.91044949 | 15.37328718 | MCF2L   | 0.144772718 | 0.115984272 |
| PAQR5    | 8.761708524 | 9.475150837 | RHBDF1  | 8.13249247  | 5.236667943 |
| PAQR3    | 5.79835944  | 6.062191477 | MYEOV   | 5.937987837 | 5.533557354 |
| HNF1A    | 0.229457456 | 0.303357004 | RHBDF2  | 0.717844253 | 0.810329729 |
| PPP1R3F  | 3.021502464 | 3.158755544 | PPP2R5B | 13.70510316 | 10.95019151 |
| STX1B    | 0.591616397 | 0.491839784 | PPP2R5A | 6.444433441 | 7.025509286 |
| PPP1R3C  | 2.442148515 | 1.815587165 | PPP2R5D | 29.99233071 | 32.5816083  |
| PPP1R3B  | 0.1         | 0.1         | PPP2R5C | 19.19467465 | 22.40563105 |
| PPP1R3E  | 1.105508587 | 1.13153966  | ATP5F1  | 103.8306924 | 138.0461218 |
| PPP1R3D  | 3.322597966 | 2.454505643 | SKIV2L2 | 19.47668941 | 24.1441491  |
| PPP1R42  | 0.339627661 | 0.339537973 | STOML2  | 121.3922546 | 145.8844798 |
| STX1A    | 7.848348588 | 9.181905016 | STOML1  | 10.9740801  | 7.009194622 |
| PPP1R37  | 9.321703637 | 7.626898895 | ETFDH   | 10.29077637 | 11.92802294 |
| L3MBTL1  | 0.346946058 | 0.57387081  | PPP2R3C | 10.64469794 | 9.245204475 |
| L3MBTL3  | 1.714815847 | 2.079043892 | PPP2R3B | 0.892331924 | 1.399671939 |
| L3MBTL2  | 14.55261089 | 14.6378452  | PPP2R3A | 4.339053419 | 3.878008706 |
| PPP1R32  | 0.572591214 | 0.34102772  | WEE1    | 11.25119699 | 10.39227832 |
| PPP1R35  | 29.30173492 | 32.94462037 | PPP2R2C | 0.220816923 | 0.151759302 |
| PPP1R26  | 0.324941565 | 0.399323128 | PPP2R2D | 3.613021449 | 3.993676979 |
| PPP1R21  | 2.136037605 | 2.165273949 | CKLF    | 25.84162373 | 30.59407805 |
| ICK      | 7.170637088 | 7.176315766 | PGAP1   | 1.265704874 | 1.247711514 |
| ID2      | 63.40133602 | 54.97978544 | PGAP2   | 7.167873869 | 6.777293217 |
| PPP1R1B  | 0.1         | 0.140232284 | PGAP3   | 3.425500424 | 2.874814812 |
| ID1      | 268.8309364 | 255.126153  | CCBE1   | 3.626780067 | 3.442625195 |
| ID4      | 13.17092533 | 10.87601193 | HDHD2   | 4.958477302 | 5.166986617 |
| ID3      | 433.4046782 | 415.5007713 | HDHD3   | 5.292109029 | 4.022799677 |
| ANKRD18B | 0.112655609 | 0.136145351 | HDHD1   | 10.63606704 | 11.95535596 |
| ANKRD18A | 0.819003582 | 0.632050194 | ETHE1   | 9.120323857 | 8.297225208 |
| PPP1R11  | 19.8002739  | 19.70596103 | UQCRC1  | 111.8418314 | 118.654515  |
| PPP1R10  | 7.997998189 | 8.096105132 | UQCRC2  | 57.07881991 | 74.04458335 |
| KIF14    | 5.968345427 | 7.108998006 | NYAP1   | 0.628228541 | 0.477164882 |
| HNF4G    | 0.986756739 | 0.65175424  | NCAPG   | 16.64072434 | 20.9607274  |
| MIA3     | 8.753216515 | 8.981959031 | NCAPH   | 8.682807106 | 10.52603812 |
| AP2A1    | 59.3265344  | 49.01468498 | RHBDL2  | 0.43936599  | 0.30192796  |
| IDE      | 7.589583689 | 7.379163885 | RHBDL1  | 0.228353989 | 0.214558883 |
| KIF11    | 16.77597114 | 20.09344876 | LRRC39  | 1.007981695 | 1.449197353 |
| KIF17    | 0.721184132 | 0.679313479 | LRRC32  | 2.666238867 | 2.878621446 |
| PPP1R18  | 13.71946574 | 12.54806765 | HSPB11  | 40.26091624 | 44.25345785 |
| AP2A2    | 21.83562877 | 19.02153021 | LETM2   | 2.563207098 | 1.721727708 |
| KIF15    | 3.622848635 | 5.253458687 | NKRF    | 4.696597883 | 6.862422168 |
| KIF1C    | 65.32618329 | 62.45774379 | LRRC47  | 44.04669956 | 49.89975859 |

|         |             |             |         |             |             |
|---------|-------------|-------------|---------|-------------|-------------|
| IDS     | 10.64649984 | 9.196057495 | LRRC48  | 0.93831014  | 0.64726294  |
| KIF1B   | 6.576111363 | 6.880088591 | LRRC45  | 3.638043873 | 4.638647497 |
| KIF1A   | 0.195622749 | 0.236552799 | LRRC46  | 0.775745018 | 0.485995486 |
| NDEL1   | 31.23233121 | 29.57103297 | PGAM1   | 107.8988997 | 119.4051903 |
| KIF24   | 4.68025551  | 4.770278831 | LRRC49  | 1.385188584 | 1.535295995 |
| KIF23   | 21.77078516 | 25.22798471 | PGAM2   | 1.676118088 | 1.22537727  |
| MMEL1   | 1.550052872 | 1.838389593 | LRRC40  | 8.408676216 | 11.10859125 |
| KIF22   | 23.30404431 | 28.01595703 | PTGR1   | 17.74940327 | 16.89387623 |
| KIF27   | 0.561741403 | 0.521698871 | PTGR2   | 3.785055884 | 4.647395853 |
| KIF2A   | 13.83958478 | 16.56108174 | LRRC41  | 48.21208284 | 42.5645342  |
| KIF2C   | 53.08719476 | 62.26878698 | LRRC42  | 29.02392236 | 26.45900673 |
| STX12   | 14.03691289 | 9.617502851 | VAMP8   | 0.300842566 | 0.147801761 |
| STX17   | 2.52158529  | 1.560569369 | VAMP7   | 1.623956226 | 1.578744496 |
| STX16   | 9.513358018 | 9.502366663 | CKS2    | 256.2969173 | 298.0635795 |
| STX18   | 8.477685073 | 9.450892678 | VAMP1   | 1.01026449  | 1.931664784 |
| XIAP    | 1.45800431  | 1.482715373 | PGAM4   | 1.648011829 | 1.448476839 |
| FUOM    | 7.270358541 | 6.185761638 | PGAM5   | 19.48371619 | 25.801609   |
| COL19A1 | 0.356005605 | 0.495342362 | VAMP4   | 2.448137252 | 2.460210767 |
| STX11   | 0.486991707 | 0.497630052 | VAMP5   | 0.1         | 0.1         |
| STX10   | 30.15938926 | 37.24742413 | LYPLAL1 | 3.418578814 | 2.980934781 |
| MICA    | 6.872261029 | 5.861643575 | VAMP2   | 10.55297323 | 9.862408321 |
| MICB    | 4.122791138 | 3.987275483 | VAMP3   | 88.40539052 | 84.85302004 |
| ERCC6L2 | 1.206773493 | 1.105781136 | KANK2   | 37.34770895 | 26.6385682  |
| MIB2    | 10.51936655 | 8.466323727 | LRRC14  | 18.21653874 | 18.27525449 |
| DOHH    | 12.57648778 | 13.80950728 | KANK1   | 15.58687696 | 10.96219936 |
| AP2B1   | 49.98178929 | 49.30199754 | PTGS2   | 0.79376288  | 0.240351842 |
| MIB1    | 2.478452944 | 2.77146237  | EXTL2   | 5.699820616 | 7.144755593 |
| MIDN    | 20.63116588 | 19.57988252 | LEO1    | 11.23580846 | 13.9170683  |
| ERCC6L  | 5.533458966 | 6.818743671 | ANO10   | 20.73245819 | 15.57736126 |
| KIF5C   | 4.318521341 | 4.114358599 | PRAME   | 6.069030374 | 5.504804205 |
| KIF5B   | 43.9088031  | 44.36230357 | YKT6    | 73.48164828 | 70.18463934 |
| KIF5A   | 0.366621899 | 0.318928874 | EXTL3   | 20.34788729 | 18.65878472 |
| G6PD    | 86.78664664 | 77.40015514 | NKTR    | 2.599643914 | 2.958616751 |
| MID1    | 11.49115156 | 10.23566895 | LRRC26  | 0.1         | 0.161978557 |
| MID2    | 0.1         | 0.105050261 | LRRC23  | 3.130491157 | 2.18139488  |
| DOK1    | 1.068465882 | 0.69271637  | LRRC24  | 5.787668021 | 5.082173561 |
| DOK3    | 1.066944242 | 1.496523177 | LRRC29  | 0.91339644  | 0.605026088 |
| DOK4    | 0.488801431 | 0.53624643  | SMAGP   | 13.76887324 | 12.62397331 |
| DOK5    | 0.1         | 0.1         | LRRC27  | 0.555879579 | 0.561134058 |
| DOK6    | 1.378782697 | 1.263231692 | LRRC28  | 2.431037172 | 2.523175487 |
| DOK7    | 0.120246016 | 0.1         | LRRC20  | 4.98040969  | 5.223923452 |
| TMED10  | 65.75367701 | 65.22962188 | LETM1   | 13.57765644 | 15.99167866 |
| SEL1L   | 8.94095782  | 7.119206416 | LRRC73  | 1.178674101 | 1.057537398 |
| PSEN2   | 9.640225798 | 9.284760902 | LEPR    | 4.146837544 | 3.451838969 |
| PSEN1   | 13.48449156 | 10.41205638 | SH3GLB1 | 21.6882678  | 19.93733983 |
| FUT2    | 0.217347189 | 0.219697213 | SH3GLB2 | 23.4713971  | 22.09585518 |
| FUT1    | 0.112235345 | 0.152417569 | ANAPC7  | 21.5458966  | 23.27014912 |
| FUT4    | 0.563850687 | 0.529330627 | AKR1E2  | 0.481103066 | 0.557647265 |
| FUT3    | 0.1         | 0.114322072 | MRT04   | 23.3443681  | 33.73443752 |
| FUT8    | 7.451216312 | 5.930519345 | ANAPC4  | 3.516388534 | 3.345289805 |

|              |             |             |         |             |             |
|--------------|-------------|-------------|---------|-------------|-------------|
| KIF3B        | 16.29867318 | 15.97237294 | ANAPC5  | 56.88027186 | 56.58205036 |
| KIF3A        | 2.507842468 | 2.186806216 | ANAPC1  | 4.411692277 | 6.120740931 |
| KIF3C        | 6.078557928 | 5.406972402 | ANAPC2  | 12.20272341 | 11.24198843 |
| PHF10        | 15.52400517 | 16.63061408 | KANK3   | 0.295305553 | 0.264806617 |
| PHF12        | 8.017490703 | 8.364331548 | LRRC58  | 5.52300197  | 7.36143771  |
| PHF11        | 9.27149321  | 6.150509728 | LRRC59  | 110.9887977 | 116.3199038 |
| DOLK         | 18.83923103 | 14.54046941 | LRRC56  | 0.334099121 | 0.253778987 |
| IL6          | 8.85666     | 4.986342003 | LRRC57  | 3.649466129 | 3.310219764 |
| IL8          | 40.68598295 | 42.2198274  | LRRC69  | 0.374874481 | 0.548606696 |
| IL7          | 2.30217359  | 1.08274525  | LRRC61  | 0.1         | 0.117149406 |
| KIF4A        | 22.06473674 | 25.31018759 | SLC25A1 | 98.50146692 | 82.38682074 |
| PHF14        | 4.295825954 | 4.531800021 | SLC25A3 | 225.1316297 | 267.3060412 |
| PHF13        | 18.94118519 | 18.61676088 | ERC1    | 8.898687659 | 8.493570448 |
| PHF19        | 36.69240097 | 40.04822886 | VEZF1   | 9.587517052 | 9.307050525 |
| SNED1        | 12.04036793 | 9.021225257 | SLC25A5 | 310.2695041 | 360.8002672 |
| ILK          | 60.7762995  | 46.89489581 | SLC25A4 | 3.778902646 | 3.817808963 |
| PPP1R9A      | 0.569186359 | 0.473798043 | PRCC    | 48.75018186 | 54.79676058 |
| LOC102724296 | 1.367104316 | 1.877159529 | PRCP    | 21.13014068 | 21.38794849 |
| PPP1R9B      | 29.1983578  | 28.81570109 | IFI16   | 2.314475714 | 2.050502204 |
| CNPPD1       | 25.78070018 | 22.34747436 | SH3BP1  | 9.074502428 | 8.538346808 |
| VCAN         | 7.376358784 | 8.14264621  | SH3BP2  | 0.833217458 | 0.9054319   |
| LMBRD1       | 8.518447829 | 8.618157744 | LRRC8C  | 2.154407373 | 2.148491486 |
| LMBRD2       | 2.844414076 | 2.68983057  | SH3BP5  | 2.070457826 | 2.310910567 |
| INA          | 11.11412093 | 6.873617469 | BEND3   | 0.841046744 | 0.941023888 |
| PDLIM1       | 50.30860756 | 39.49494357 | LRRC8D  | 14.0304559  | 14.13880557 |
| PDLIM3       | 3.341264389 | 2.674358536 | SH3BP4  | 16.17753198 | 15.07937291 |
| PDLIM2       | 10.05507326 | 9.373541544 | LRRC8A  | 14.46974119 | 14.16273212 |
| PDLIM5       | 50.06937595 | 42.49658031 | D2HGDH  | 2.636141668 | 3.000192245 |
| PDLIM4       | 0.122636722 | 0.148489106 | LRRC8B  | 0.62183904  | 1.186383664 |
| TAS1R3       | 0.140602796 | 0.288442423 | LRRC8E  | 0.789008978 | 0.660840178 |
| PDLIM7       | 50.80661096 | 41.50249902 | BEND6   | 1.67428112  | 2.181190841 |
| MBTPS1       | 27.75476304 | 24.92331019 | CYB5B   | 14.20902622 | 15.81698688 |
| MIIP         | 27.47465955 | 26.46342738 | CYB5A   | 18.48183234 | 17.87249493 |
| MAPK14       | 12.46423684 | 14.04972433 | ERAP2   | 0.720749751 | 0.445456125 |
| MAPK15       | 0.691577688 | 1.059993949 | MBOAT7  | 89.93033425 | 77.65663678 |
| U2SURP       | 7.930276875 | 10.40724821 | ERAP1   | 14.59500171 | 10.84827379 |
| MAPK12       | 16.30145297 | 16.13043213 | MBOAT1  | 1.699425888 | 1.087460442 |
| MAPK13       | 0.116367762 | 0.135060649 | MBOAT2  | 10.95732524 | 9.305282037 |
| MAPK10       | 0.46092941  | 0.508041197 | RPL23A  | 123.0692082 | 160.5227084 |
| MAPK11       | 6.822338604 | 4.511534001 | USH1G   | 0.1         | 0.1         |
| CHPT1        | 16.61115294 | 19.47619335 | PRC1    | 47.00699126 | 53.46556907 |
| MBTPS2       | 10.38692689 | 9.863348489 | SMAP2   | 25.29548279 | 29.99055506 |
| SERPINE2     | 314.7801919 | 237.3001299 | SMAP1   | 14.72513175 | 14.48856872 |
| SERPINE1     | 44.7878696  | 20.03084665 | PREP    | 21.45951245 | 21.76662306 |
| IPP          | 2.448080315 | 2.541508678 | IFI35   | 126.9857989 | 45.0581294  |
| DUS4L        | 1.846261411 | 2.687240162 | IFI30   | 23.54882541 | 15.25520408 |
| EARS2        | 6.865991651 | 7.093776409 | CCAR2   | 72.28780896 | 79.30608028 |
| ISY1-RAB43   | 3.298263302 | 2.991119897 | CCAR1   | 19.97111751 | 22.31903873 |
| TRIQQ        | 4.390800712 | 5.306368854 | TM4SF1  | 275.9241069 | 238.919744  |

|                   |             |             |          |             |             |
|-------------------|-------------|-------------|----------|-------------|-------------|
| SERPINF1          | 0.506663616 | 0.366168185 | IFI27    | 89.46474805 | 51.18716439 |
| SERPINF2          | 0.185586947 | 0.115277663 | PREB     | 22.80018846 | 22.15089694 |
| BIN3              | 17.69595049 | 15.21243807 | PRH1     | 0.485967882 | 0.706293949 |
| BIN1              | 24.02211293 | 22.19806078 | PGBD1    | 3.298276382 | 3.365706496 |
| YME1L1            | 50.9763415  | 48.24313336 | PGBD2    | 1.124968824 | 0.873666375 |
| DUS3L             | 10.35069198 | 14.20574823 | PGBD3    | 6.10672311  | 4.536239644 |
| MAPKAP1           | 24.58366514 | 29.95015081 | PGBD4    | 0.615478589 | 0.692098425 |
| FAM160B1          | 5.858454797 | 4.773481866 | PGBD5    | 0.161957397 | 0.12211936  |
| FAM160B2          | 21.58476189 | 18.32824816 | TSPAN9   | 13.71673693 | 11.17550933 |
| RAD21             | 130.6570225 | 143.3428321 | ERI1     | 13.88988392 | 16.30408213 |
| SERPINH1          | 142.322747  | 127.1628292 | TSPAN6   | 7.202071919 | 7.751630483 |
| DNAJC25-<br>GNG10 | 6.165025664 | 6.06377188  | ERI2     | 2.680508762 | 3.223830723 |
| SIVA1             | 44.97620034 | 53.64838775 | ERI3     | 49.27934998 | 55.2836907  |
| TRIP4             | 8.713683229 | 7.805382611 | TSPAN7   | 0.1         | 0.1         |
| MINA              | 8.833104965 | 10.31443625 | TSPAN4   | 69.6209687  | 64.44865888 |
| FAM160A1          | 1.476557419 | 1.184452306 | TSPAN5   | 30.16659127 | 26.17620513 |
| FAM160A2          | 5.113625527 | 4.2853097   | TSPAN2   | 0.116169087 | 0.1         |
| TRIP6             | 222.2569447 | 212.015245  | TSPAN3   | 27.03270664 | 28.83017282 |
| RAD17             | 9.984535    | 11.12039071 | TSPAN1   | 1.662684206 | 2.354341591 |
| SERPINI1          | 8.53188265  | 6.02341397  | HMGCLL1  | 0.1         | 0.114388738 |
| DUS1L             | 22.68043417 | 27.77948747 | PRG2     | 0.281859779 | 0.186567482 |
| RAD18             | 13.06292536 | 15.65770308 | IFI44    | 95.42427241 | 41.96525823 |
| SERPINA3          | 0.492085109 | 0.449944964 | ERAL1    | 23.30015931 | 25.83217226 |
| SERPINA1          | 0.261796163 | 0.226027745 | RPL27A   | 65.95748065 | 89.18986252 |
| SPIN4             | 2.045646073 | 2.616846392 | AKR1B1   | 126.5418704 | 122.1202835 |
| SPIN3             | 1.361177993 | 1.876223993 | LYNX1    | 0.183944701 | 0.174922574 |
| SRP54             | 38.88938839 | 37.88376805 | AKR1A1   | 53.33361862 | 46.81986752 |
| TRIM8             | 55.64848639 | 46.46770772 | PDZRN3   | 6.317672659 | 5.680617165 |
| TRIM9             | 1.702393283 | 2.102241924 | TMPRSS5  | 0.210959583 | 0.179227181 |
| TRIM6             | 0.524092057 | 0.359551017 | TMPRSS3  | 0.1         | 0.1         |
| TRIM7             | 1.533019604 | 1.862866654 | TMPRSS2  | 0.14508355  | 0.1         |
| CSRP2             | 17.87024988 | 15.90835493 | PRKX     | 1.807800032 | 2.544898198 |
| CSRP1             | 108.9041124 | 81.45637758 | HIST2H4A | 0.362380187 | 0.1         |
| TRIM4             | 11.80330965 | 11.74958487 | RXRβ     | 2.123891598 | 2.147429927 |
| TRIM5             | 2.669877325 | 1.580117043 | RXRA     | 6.732678426 | 6.663020709 |
| TRIM2             | 2.229995485 | 2.22919827  | HIST2H4B | 0.362380187 | 1.130393505 |
| TRIM3             | 6.154728603 | 5.214756991 | TSNAX    | 9.745293688 | 11.18625646 |
| SPIN1             | 27.18110667 | 27.1006268  | AKR1C1   | 7.973688824 | 5.856455084 |
| AP3S2             | 4.185380446 | 3.623731299 | RFTN1    | 6.606888788 | 6.50065892  |
| AP3S1             | 63.6586996  | 59.12260266 | AKR1C3   | 4.174609959 | 4.373102476 |
| MIOX              | 0.172305187 | 0.125813616 | AKR1C2   | 0.517800064 | 0.326309389 |
| SERPINB1          | 1.531728106 | 0.710712829 | NLE1     | 7.78429842  | 10.60356419 |
| MIOS              | 9.236057431 | 10.54773786 | CLGN     | 0.541333664 | 0.448883238 |
| ITPK1             | 19.80512552 | 22.56331178 | BAALC    | 0.683517327 | 0.542682222 |
| SERPINB7          | 0.192604772 | 0.1         | DIMT1    | 20.11975991 | 30.9284207  |
| NUDT16L1          | 8.587814266 | 8.694352586 | SSU72    | 45.07150915 | 53.12671976 |
| SERPINB8          | 2.781850581 | 2.518233252 | PRLR     | 2.829419882 | 2.576082666 |
| SERPINB5          | 0.1         | 0.1         | ERN1     | 0.624308272 | 0.478931174 |
| SERPINB6          | 22.8442857  | 20.78928934 | PLA2G15  | 18.03397002 | 12.07420935 |



|                  |             |             |         |             |             |
|------------------|-------------|-------------|---------|-------------|-------------|
| ITPKB            | 0.226463673 | 0.18427756  | PLA2G16 | 0.844821175 | 0.844542404 |
| ITPKC            | 6.192956266 | 4.877860104 | DEAF1   | 7.713163904 | 8.918773662 |
| C14orf169        | 9.254224201 | 10.52190946 | NPHP1   | 1.085828027 | 1.135927305 |
| C14orf166        | 77.45846667 | 101.5001327 | ISOC1   | 4.674494523 | 6.212323983 |
| C14orf164        | 0.163979405 | 0.237047412 | CAMTA1  | 6.215534026 | 6.272110786 |
| IVD              | 4.164783729 | 4.115552823 | NPHP3   | 0.831437023 | 0.690977823 |
| ITPKA            | 0.465260465 | 0.581481876 | NPHP4   | 2.469018925 | 2.242941758 |
| NAPRT1           | 15.93247959 | 14.54124027 | CAMTA2  | 22.43519451 | 21.86568242 |
| LOC10272447<br>4 | 1.19475871  | 0.526369726 | ISOC2   | 102.6704699 | 99.74697802 |
| SRP72            | 34.38569827 | 38.69669045 | PRPH    | 0.12665535  | 0.157097229 |
| CHRNE            | 3.816839328 | 3.492759101 | PRNP    | 272.6166803 | 233.3464923 |
| MISP             | 3.33843262  | 2.728720438 | CLK4    | 6.908485041 | 8.081583634 |
| C14orf182        | 0.216049018 | 0.182861131 | CLK3    | 11.06707016 | 13.36339981 |
| GTF2H1           | 13.50535084 | 13.20695715 | CLK2    | 8.932170018 | 9.640347883 |
| GTF2H2           | 3.96106364  | 4.62506999  | CLK1    | 5.835994578 | 7.745872236 |
| LOC10272448<br>8 | 0.218803966 | 0.366602958 | PRR5    | 0.445528837 | 0.564402706 |
| SRP68            | 21.44559486 | 22.99425905 | PRR4    | 2.40280483  | 2.27040334  |
| GTF2H3           | 5.877432031 | 6.461481234 | PRR7    | 33.20138796 | 49.12445205 |
| GTF2H4           | 7.623247278 | 9.070908486 | PRR3    | 5.0219409   | 6.458532892 |
| GTF2H5           | 3.20208667  | 2.864967236 | AFF3    | 1.560940869 | 1.100001308 |
| SEMA5B           | 0.458066778 | 0.340627066 | AFF4    | 13.2388404  | 11.21823689 |
| CHRM4            | 0.524669839 | 0.201074022 | AFF1    | 1.621495538 | 1.263151439 |
| LOC10272441<br>3 | 0.206566722 | 0.290226493 | NCBP1   | 15.5666318  | 17.64407228 |
| SEMA6B           | 0.693051107 | 0.476399454 | NCBP2   | 19.5299433  | 22.07844136 |
| TPD52            | 8.091604093 | 10.36773203 | PLA2G4B | 0.460904666 | 0.466194693 |
| SEMA6C           | 1.227078551 | 0.929903379 | PLA2G4C | 0.889287028 | 0.461259897 |
| ANKRD36C         | 0.194298604 | 0.338247926 | PLA2G4A | 6.36325163  | 5.446222037 |
| BIVM             | 4.079704447 | 5.850363752 | SSTR2   | 1.677959347 | 1.11526089  |
| MITF             | 2.462892971 | 2.596056042 | CRMP1   | 2.307126045 | 1.48641815  |
| GTF2F1           | 57.73312969 | 55.19596066 | CLN8    | 3.397228487 | 3.954812917 |
| GTF2F2           | 29.57716885 | 32.37243481 | CLN6    | 24.75484331 | 28.21016429 |
| LOC10272442<br>8 | 0.739739716 | 0.753676389 | PTHLH   | 1.913212205 | 1.90468709  |
| LOC10272442<br>6 | 1.360953325 | 0.910309455 | CLN5    | 15.46273476 | 12.48680192 |
| TTPAL            | 6.246845561 | 6.024523915 | CLN3    | 34.12767906 | 29.43793697 |
| ANKRD36B         | 0.212824357 | 0.292101429 | CLMP    | 64.70985525 | 50.27466669 |
| SEMA7A           | 0.115252871 | 0.132672489 | CLMN    | 0.12444766  | 0.114546732 |
| RHOBTB3          | 3.805471965 | 4.965027184 | UQCRHL  | 8.404479219 | 10.30434311 |
| ITPR1            | 4.002586855 | 3.632258052 | S100P   | 0.201865249 | 0.1         |
| ITPR2            | 1.079666824 | 1.245173176 | CLPB    | 12.19992749 | 12.77942052 |
| ITPR3            | 0.396603689 | 0.372871007 | BACH1   | 5.862588725 | 4.729703721 |
| VTCN1            | 0.1         | 0.1         | BACH2   | 0.240942151 | 0.252965634 |
| GTF2E1           | 5.444147186 | 6.728762963 | HENMT1  | 11.28568165 | 13.13521735 |
| RHOBTB1          | 0.792986638 | 0.91115605  | CLP1    | 9.668490884 | 10.24764568 |
| GTF2E2           | 56.14379294 | 63.63824948 | DIP2A   | 2.893539173 | 2.751037116 |
| RHOBTB2          | 18.64381239 | 17.26175315 | DIP2B   | 12.09380026 | 11.47724684 |

|                  |             |             |          |             |             |
|------------------|-------------|-------------|----------|-------------|-------------|
| ANKRD34B         | 0.126404715 | 0.1         | DIP2C    | 2.598336846 | 2.227789975 |
| ANKRD34A         | 3.248126635 | 3.753990913 | ACOT9    | 23.09848794 | 24.54601209 |
| SLC37A2          | 0.90477431  | 0.86027128  | ACOT8    | 31.68158353 | 29.83033253 |
| SLC37A1          | 0.1         | 0.107355575 | ACOT7    | 45.71926538 | 50.51107459 |
| LOC10272444<br>1 | 0.1         | 0.128811003 | CLPX     | 7.016524753 | 9.251261753 |
| NSFL1C           | 38.82361552 | 38.90668364 | NISCH    | 9.359111626 | 9.020697891 |
| RAD9B            | 0.519243661 | 0.386874856 | DYNC1L11 | 25.43247172 | 26.29108858 |
| RAD9A            | 7.31793042  | 6.224036868 | DYNC1L12 | 17.1495081  | 17.64615656 |
| LMBR1L           | 3.642491946 | 2.900411936 | CLPP     | 81.34439492 | 93.49608477 |
| ANKRD33B         | 1.680859602 | 1.181068595 | ACOT2    | 14.58444822 | 12.81919132 |
| SYCP2            | 1.089548133 | 1.099842754 | ACOT1    | 5.739128006 | 4.057019598 |
| OPA1             | 12.35771698 | 15.73062354 | ACOT4    | 3.633450824 | 2.35019758  |
| OPA3             | 6.236756965 | 6.168498162 | SYCP2L   | 0.348967781 | 0.585898023 |
| SLC37A4          | 6.935169928 | 8.452234578 | HSPA4L   | 3.010925807 | 4.722573678 |
| SLC37A3          | 11.66885153 | 10.4310021  | S100A16  | 0.577015064 | 0.254817054 |
| PAPD4            | 19.49108244 | 15.14685188 | S100A13  | 44.86960658 | 43.1077289  |
| NIPSNAP1         | 25.99435576 | 28.80362166 | S100A14  | 0.147057316 | 0.234399153 |
| PTP4A1           | 24.09007681 | 25.67740796 | S100A11  | 1444.677848 | 1278.849564 |
| PTP4A2           | 71.10492679 | 77.3472557  | S100A10  | 214.4051729 | 196.5408592 |
| PTP4A3           | 3.814614057 | 2.46042248  | NPLOC4   | 41.14162739 | 38.19327862 |
| PAPD7            | 11.74863077 | 12.16796873 | CLTC     | 49.08073115 | 40.39946154 |
| PAPD5            | 1.361326296 | 1.558348411 | LPCAT1   | 24.58793086 | 23.79852836 |
| GTF2A1           | 4.465108076 | 4.891015997 | CLTB     | 75.28226248 | 79.65864946 |
| GTF2A2           | 17.27479005 | 24.08693552 | CLTA     | 249.3904723 | 250.8157478 |
| SEMA3C           | 15.08092486 | 11.82187122 | LFNG     | 0.121883436 | 0.256251753 |
| SEMA3D           | 3.858813044 | 2.795710846 | C17orf58 | 7.099820844 | 6.471858685 |
| SEMA3A           | 1.076194135 | 0.752664694 | C17orf59 | 15.43566954 | 14.6934729  |
| SEMA3B           | 0.31291507  | 0.378712997 | C17orf53 | 2.235245145 | 2.985858066 |
| SEMA3G           | 0.1         | 0.107892376 | TNKS1BP1 | 24.01295813 | 20.30279107 |
| SEMA3F           | 27.32689983 | 18.47620972 | C17orf51 | 2.903740555 | 3.002084032 |
| DPCD             | 15.61020607 | 16.59885228 | CLUH     | 44.71114875 | 55.12034259 |
| AP3M2            | 5.438013929 | 7.039515779 | BACE1    | 17.07057278 | 14.39968369 |
| AP3M1            | 15.16221109 | 17.32304803 | BACE2    | 0.140723285 | 0.133231056 |
| SEMA4A           | 0.115728513 | 0.122460894 | C17orf49 | 32.6630374  | 30.78587169 |
| SEMA4D           | 0.144431282 | 0.13965594  | PHLPP2   | 1.57941129  | 1.44122827  |
| SEMA4B           | 89.33457221 | 78.71428787 | PHLPP1   | 2.952417641 | 2.715280473 |
| CDC42BPG         | 0.121032906 | 0.145053643 | HSPA14   | 9.104455622 | 11.77779305 |
| SEMA4C           | 8.407524021 | 8.548530528 | HSPA13   | 11.61866788 | 10.91099099 |
| ADRM1            | 144.0849368 | 140.735891  | C17orf75 | 1.81168292  | 2.026338981 |
| SEMA4F           | 1.869422894 | 1.679250566 | C17orf70 | 10.83038846 | 10.18066974 |
| SEMA4G           | 0.965484751 | 0.923962683 | HSPA1L   | 0.311600261 | 0.246212716 |
| CFLAR            | 3.317134969 | 2.436027258 | BLCAP    | 27.79478773 | 27.47502381 |
| CDC42BPB         | 13.30295847 | 11.87979191 | RYBP     | 9.733581368 | 10.38031173 |
| CDC42BPA         | 7.085400928 | 6.862079664 | LPCAT4   | 18.1260828  | 17.41314204 |
| TRIT1            | 8.397938519 | 10.79534311 | LPCAT3   | 22.377757   | 18.36447625 |
| TPCN2            | 4.255275238 | 3.362161052 | C17orf67 | 1.442677139 | 1.132442001 |
| TPCN1            | 21.51169453 | 20.29725347 | LPCAT2   | 2.365877893 | 2.13095379  |
| RAD52            | 1.481448384 | 1.81042407  | C17orf62 | 21.52786746 | 17.5560782  |
| RAD50            | 11.11710421 | 11.5313233  | HSPA1B   | 9.311950661 | 8.346420428 |

|               |             |             |          |             |             |
|---------------|-------------|-------------|----------|-------------|-------------|
| RAD51         | 7.616354967 | 9.681344199 | HSPA1A   | 12.06298103 | 10.82050418 |
| DPH3P1        | 0.994609936 | 0.852833631 | TUSC3    | 16.95340087 | 15.27575439 |
| DPF1          | 15.7738108  | 15.85318206 | TUSC2    | 21.04112116 | 24.05021669 |
| DPF2          | 25.60335415 | 24.57042029 | TUSC1    | 16.10604121 | 16.73981219 |
| DPF3          | 6.885059566 | 5.812356974 | C17orf97 | 4.704708073 | 5.364588022 |
| TIPIN         | 7.36506139  | 8.735985563 | C17orf99 | 0.1         | 0.1         |
| SLC11A2       | 7.662527661 | 7.268967468 | C17orf96 | 3.475547081 | 4.828588015 |
| BOLA1         | 6.369186929 | 5.794135535 | GYG2     | 2.441250479 | 1.749843621 |
| PAPPA         | 6.621140237 | 4.191516962 | GYG1     | 52.69360236 | 49.02687497 |
| BOLA3         | 26.07563849 | 33.0428335  | WHSC1L1  | 12.6762123  | 12.53098408 |
| GRWD1         | 31.72343611 | 38.08527196 | IGFBP1   | 2.020622967 | 1.179103016 |
| BOLA2         | 5.028184377 | 4.865060872 | IGFBP5   | 0.10832686  | 0.105945531 |
| WDPCP         | 0.490493663 | 0.490347509 | IGFBP4   | 4.584166573 | 2.555248924 |
| PTDSS2        | 13.69735589 | 13.07291461 | IGFBP3   | 64.4516578  | 41.25464503 |
| SGPL1         | 9.128364752 | 7.219924685 | IGFBP2   | 0.136329564 | 0.125939976 |
| PTDSS1        | 94.47953633 | 114.6119427 | C2orf27A | 0.172862941 | 0.334114653 |
| DPH1          | 32.26482251 | 35.808416   | C17orf89 | 24.31300588 | 35.27321828 |
| DPH2          | 22.40347173 | 27.43410723 | C17orf85 | 6.115611405 | 7.408280205 |
| DPH3          | 9.033319214 | 9.964401878 | C17orf80 | 5.071079064 | 5.689120995 |
| DPH5          | 11.04769719 | 14.87201308 | RASAL1   | 0.1         | 0.1         |
| DPH6          | 1.977231017 | 2.017051445 | RASAL2   | 7.065347648 | 6.058518882 |
| DPH7          | 6.583046608 | 6.652599445 | RASAL3   | 0.115124098 | 0.121597768 |
| SRPK2         | 7.035738973 | 7.071280398 | PSAP     | 321.4051602 | 282.6891494 |
| SRPK3         | 0.177849066 | 0.118528555 | IGFBP7   | 73.90854585 | 58.91183122 |
| SRPK1         | 22.62010936 | 29.92742747 | IGFBP6   | 9.6190228   | 5.936763208 |
| SESTD1        | 1.964637143 | 1.608903199 | ATP8B3   | 1.587438738 | 1.254103662 |
| DAZAP2        | 91.60236457 | 97.88748331 | ATP8B2   | 21.14005089 | 18.61310841 |
| DAZAP1        | 81.95781235 | 94.67152004 | ATP8B1   | 3.918207674 | 2.675481131 |
| HILPDA        | 5.508525294 | 8.112550059 | WFS1     | 39.37744897 | 26.73850285 |
| AP3B1         | 38.20701225 | 36.88268145 | GON4L    | 8.887976328 | 8.464788974 |
| AP3B2         | 0.456676314 | 0.26651725  | SCCPDH   | 19.69197309 | 21.10603347 |
| CEACAM1       | 0.144289239 | 0.1         | ESAM     | 0.127796296 | 0.258776527 |
| PAPLN         | 0.114995317 | 0.12676733  | RNPEPL1  | 12.34296738 | 11.03018608 |
| HRSP12        | 16.64630187 | 22.33448536 | PSCA     | 5.09191692  | 3.09655254  |
| ANKMY2        | 9.493929535 | 8.709330936 | PSD4     | 0.574252578 | 0.578491923 |
| ANKMY1        | 0.623702389 | 0.612822574 | PSD3     | 0.340041838 | 0.328525709 |
| RP11-290F20.3 | 0.125846406 | 0.118454809 | SH3D19   | 7.722647863 | 6.70800891  |
| C1GALT1       | 12.18496701 | 11.25427255 | RTN4RL2  | 1.106263473 | 0.985581445 |
| AP3D1         | 63.18807631 | 60.48024805 | RTN4RL1  | 31.9702366  | 27.87372935 |
| RAB3GAP2      | 7.174276766 | 5.910356497 | RPL37A   | 564.2661292 | 752.4933372 |
| ZNF354A       | 12.32024167 | 13.96494274 | SLC24A1  | 1.123247224 | 0.958893639 |
| ZNF354C       | 2.915637753 | 3.371855252 | SLC24A3  | 0.1         | 0.1         |
| RAB3GAP1      | 9.461538066 | 8.797113673 | UNC93B1  | 32.51346944 | 17.47788009 |
| ZNF354B       | 2.677464356 | 2.83520934  | RPL36A   | 3.752652257 | 5.536078567 |
| SYDE2         | 0.331580729 | 0.438579738 | LAGE3    | 103.9478108 | 109.5453797 |
| SYDE1         | 42.50399252 | 36.4303957  | RPL35A   | 386.9632162 | 643.9822805 |
| C14orf132     | 6.336294454 | 5.766367991 | SH3D21   | 2.327930007 | 2.317455028 |
| IPCEF1        | 0.107575281 | 0.11081778  | CROCC    | 0.747829926 | 0.902518018 |
| DPM1          | 21.32789437 | 27.61096331 | ESF1     | 6.141597509 | 7.343512549 |

|                  |             |             |                  |             |             |
|------------------|-------------|-------------|------------------|-------------|-------------|
| DPM2             | 47.78361063 | 49.31095396 | CMAS             | 22.02598438 | 24.47144548 |
| DPM3             | 55.46780196 | 70.55739107 | SOGA2            | 10.59102944 | 8.509013351 |
| TIPRL            | 24.42718451 | 26.94571385 | SOGA3            | 0.535198546 | 0.451543968 |
| ADRB1            | 1.134669038 | 0.657319757 | SOGA1            | 7.657372173 | 8.621133743 |
| ADRB2            | 4.67944655  | 2.407031883 | PTGDS            | 0.1         | 0.145682471 |
| DPP3             | 17.72602521 | 14.64649591 | SLC6A17          | 0.1         | 0.1         |
| DPP7             | 38.16944524 | 41.25542448 | CMC4             | 12.51313698 | 15.09085772 |
| DPP8             | 2.903830695 | 2.870829371 | SLC6A16          | 0.630289623 | 0.368709798 |
| DPP9             | 38.15120325 | 36.17895742 | SLC6A15          | 6.314370466 | 7.623237345 |
| CASKIN2          | 4.356773293 | 3.790189179 | CMC2             | 27.0476998  | 32.56703526 |
| CASKIN1          | 3.320158169 | 3.552134868 | CMC1             | 16.28525623 | 17.59648579 |
| C14orf159        | 7.752201902 | 6.673649702 | SLC6A14          | 0.1         | 0.1         |
| OPN3             | 24.23997407 | 18.56252192 | PSG1             | 1.76627558  | 1.143069699 |
| C14orf142        | 9.907128817 | 13.1902032  | CMBL             | 4.387552881 | 6.09446125  |
| JMY              | 1.830001994 | 1.672509838 | PSG9             | 1.58288599  | 1.194699631 |
| SRPRB            | 30.84442391 | 29.38693983 | PSG5             | 18.34630216 | 9.57710709  |
| C10orf118        | 1.335422404 | 1.098049314 | PSG4             | 1.849281928 | 0.989712473 |
| RADIL            | 1.147518936 | 1.080418016 | LLGL1            | 12.17482935 | 9.625957467 |
| IQCJ-SCHIP1      | 3.8093001   | 3.726650729 | PTGES            | 10.972847   | 12.82452371 |
| BDKRB2           | 16.87245182 | 12.72103152 | LLGL2            | 0.333685812 | 0.287712958 |
| BDKRB1           | 141.9377677 | 113.77751   | PTGFR            | 3.59147783  | 2.736411    |
| TAS2R5           | 0.1         | 0.261278983 | LMAN2L           | 11.03039557 | 8.785167029 |
| S1PR1            | 9.161665361 | 5.086428896 | GYPC             | 40.91706522 | 36.63784341 |
| REPS2            | 0.106532287 | 0.104664173 | MGST3            | 23.35666119 | 23.61657803 |
| S1PR3            | 12.44567826 | 7.841685171 | MGST1            | 3.649295895 | 3.964994893 |
| C14orf119        | 21.72725486 | 23.37674672 | MGST2            | 0.140650451 | 0.129025169 |
| S1PR2            | 1.288617386 | 0.96939452  | NMD3             | 12.44175648 | 14.33601855 |
| S1PR5            | 0.224683065 | 0.203863665 | SLC6A20          | 0.1         | 0.1         |
| REPS1            | 9.743108391 | 10.25267051 | NTSR1            | 3.167790799 | 3.331824739 |
| RWDD1            | 25.58379208 | 32.03610165 | TVP23C-<br>CDRT4 | 1.082234525 | 0.648315279 |
| RWDD3            | 4.163440524 | 5.062158194 | RPL39L           | 36.01510755 | 42.68178109 |
| RWDD4            | 5.249046735 | 6.337198786 | MEMO1            | 8.348052794 | 9.8540889   |
| SGPP2            | 0.110976395 | 0.123512043 | GKAP1            | 0.627001742 | 0.634726368 |
| SGPP1            | 6.960896959 | 7.38655425  | RYR1             | 0.103375432 | 0.102410121 |
| XPNPEP1          | 16.46905143 | 17.20802229 | GYS1             | 25.57306947 | 24.2552945  |
| XPNPEP3          | 1.338942927 | 1.507994321 | ZMYM1            | 3.831564088 | 4.63197913  |
| ITSN2            | 1.833975868 | 1.684027711 | ZMYM2            | 4.368856759 | 5.682043939 |
| JRK              | 4.290721159 | 4.551787808 | ZMYM3            | 17.24443089 | 15.33661974 |
| ITSN1            | 5.691277364 | 6.454226633 | ZMYM4            | 13.61405615 | 12.70825907 |
| LOC10272413<br>8 | 3.072336742 | 3.191180515 | ZMYM5            | 4.398933162 | 4.499308118 |
| ANKFY1           | 28.16043731 | 20.49474619 | ZMYM6            | 4.583258888 | 4.202348018 |
| HEMK1            | 3.379080942 | 3.004507382 | NME2             | 275.8084829 | 348.9597228 |
| CXADR            | 2.751406402 | 3.233717226 | NME3             | 36.78354469 | 33.35305429 |
| LOC10272414<br>7 | 8.656680914 | 8.962316625 | NME4             | 155.404082  | 192.5522726 |
| LOC10272414<br>1 | 4.85304354  | 1.231253469 | NME1             | 79.11028351 | 127.9687358 |
| MTHFD1           | 65.97325491 | 78.02141694 | RAD51B           | 2.431442014 | 2.520375177 |

|              |             |             |          |             |             |
|--------------|-------------|-------------|----------|-------------|-------------|
| MTHFD2       | 35.2341532  | 38.45984639 | RAD51D   | 3.663216643 | 3.637795881 |
| EWSR1        | 112.0144574 | 124.0565695 | RAD51C   | 8.666852028 | 12.7827255  |
| JTB          | 79.80923373 | 80.95774088 | NME6     | 7.586742917 | 9.060854    |
| OPTN         | 51.09804254 | 32.35759016 | NRN1L    | 0.510357638 | 0.158600578 |
| LOC102724159 | 2.321756158 | 3.036480853 | NME7     | 14.42928414 | 13.96677456 |
| NPBWR1       | 0.1         | 0.1         | DNASE1L2 | 0.395513521 | 0.332102291 |
| LTA4H        | 13.09955169 | 19.25024026 | DNASE1L1 | 8.783308449 | 6.936547944 |
| HEXIM1       | 13.19367608 | 12.36394376 | UQCR11   | 100.2667318 | 124.6363691 |
| HEXIM2       | 3.300789577 | 2.087911931 | UQCR10   | 74.53685532 | 93.80557055 |
| JUN          | 119.5582327 | 107.4531737 | RAD54B   | 5.353065925 | 8.366896885 |
| JUP          | 5.327708316 | 6.433924042 | RAD54L   | 10.32181832 | 11.67866217 |
| EIF2AK1      | 44.2905823  | 45.44377581 | LCMT2    | 2.307974891 | 2.119527839 |
| EIF2AK3      | 2.525436124 | 1.791902588 | LY6G6C   | 0.1         | 0.1         |
| EIF2AK2      | 13.70913166 | 8.400971409 | LCMT1    | 14.32024005 | 11.95930276 |
| EIF2AK4      | 13.20092072 | 11.35880624 | SUZ12    | 8.246034496 | 10.10887933 |
| LOC102724164 | 3.170029415 | 3.459256799 | LY6G5B   | 4.798435902 | 4.077798182 |
| HLA-DRB1     | 0.1         | 0.1         | LY6G5C   | 0.386232931 | 0.329922518 |
| KDM8         | 0.944903751 | 1.100556644 | CCBL2    | 9.008002418 | 7.046537625 |
| TFCP2L1      | 0.1         | 0.1         | CCBL1    | 1.875576415 | 1.8450814   |
| NHSL1        | 2.132001622 | 1.481560855 | ESPN     | 0.1         | 0.1         |
| DUSP4        | 21.27280912 | 17.46555666 | CMIP     | 2.341643349 | 2.892491739 |
| DUSP5        | 10.72452935 | 8.375755428 | KNTC1    | 5.79860382  | 6.256619684 |
| CHST9        | 0.137015516 | 0.1         | PSPH     | 10.79585114 | 12.0762582  |
| DUSP2        | 0.223326474 | 0.738415916 | MYH15    | 3.235877194 | 3.387820496 |
| DUSP3        | 17.94643576 | 15.55140304 | KCTD1    | 15.24173039 | 13.39811262 |
| CHST7        | 0.960954873 | 0.609782397 | KCTD2    | 6.941609488 | 6.399387874 |
| DUSP1        | 15.75725245 | 13.03897298 | KCTD3    | 7.923541473 | 9.228160607 |
| DUSP8        | 4.002443341 | 3.583020298 | KCTD5    | 14.73832165 | 14.7539276  |
| DUSP9        | 0.185131138 | 0.130392598 | KCTD6    | 1.949897103 | 2.317158724 |
| DUSP6        | 26.66515652 | 23.63243379 | KCTD7    | 2.547912081 | 2.626310268 |
| DUSP7        | 29.50426218 | 29.01854315 | KCTD9    | 30.2521137  | 29.88962869 |
| DPYD         | 17.00051659 | 14.21880021 | AGER     | 0.402764465 | 0.548987965 |
| CHST2        | 3.766853487 | 3.309985857 | PDZD4    | 2.139209003 | 1.764037361 |
| CHST3        | 27.68863884 | 21.12871632 | PDZD2    | 0.956748026 | 0.352808369 |
| ABRACL       | 30.77891978 | 30.65330137 | MYH14    | 0.122548297 | 0.121466531 |
| ATAD1        | 6.717512587 | 7.640126994 | MYH11    | 0.436762815 | 0.441980212 |
| ATAD5        | 0.881972784 | 1.400820239 | PDZD9    | 1.293963073 | 1.666242185 |
| ATAD2        | 32.0549364  | 39.42714833 | PDZD8    | 3.550180363 | 4.344650167 |
| LOC102724121 | 0.99881102  | 1.255181646 | MYH10    | 11.80385865 | 14.08344    |
| EFEMP2       | 25.84954492 | 17.28385454 | PDZD7    | 0.439140348 | 0.395964092 |
| EFEMP1       | 8.81451608  | 7.197526301 | SMAD2    | 4.833601547 | 4.771977839 |
| PCYT2        | 15.71681676 | 11.32210748 | SMAD1    | 12.03383391 | 10.79370432 |
| SRSF2        | 68.26961353 | 82.11278522 | SMAD4    | 5.495304757 | 5.288616267 |
| SRSF3        | 47.4478166  | 57.29714345 | SMAD3    | 14.689685   | 13.5276717  |
| SRSF4        | 29.59403185 | 31.91462612 | PSPN     | 0.430899853 | 0.178756191 |
| PTPRCAP      | 0.443668866 | 0.304488237 | IFT122   | 9.982036381 | 9.390341438 |
| SRSF5        | 40.9435842  | 48.4055465  | SMAD9    | 1.029028558 | 1.141449229 |

|              |             |             |          |             |             |
|--------------|-------------|-------------|----------|-------------|-------------|
| SRSF6        | 22.5108622  | 27.17920325 | SMAD6    | 5.793763335 | 5.187974304 |
| SRSF7        | 37.25278144 | 44.303012   | SMAD5    | 7.684769299 | 8.955343503 |
| SRSF8        | 0.1         | 0.108531317 | SMAD7    | 12.13277066 | 11.34721074 |
| SRSF9        | 87.8319931  | 89.24720074 | PRAC2    | 0.1         | 0.1         |
| KMT2E        | 7.003622993 | 6.726467686 | PSTK     | 0.770339058 | 1.057268805 |
| KMT2D        | 3.063820351 | 2.548214968 | RASA4B   | 0.224031016 | 0.1         |
| KMT2A        | 1.727977825 | 1.550772198 | PTGIS    | 7.526909309 | 6.091472495 |
| KMT2C        | 1.08882372  | 0.819072855 | TRNAU1AP | 19.97813129 | 18.82196873 |
| KMT2B        | 6.516464248 | 5.864071636 | UACA     | 5.676690749 | 5.4859891   |
| AP4S1        | 0.721697179 | 0.713393522 | NCALD    | 4.941875381 | 3.625357877 |
| KDSR         | 6.136662427 | 5.516404795 | ERBB3    | 0.469984776 | 0.357732612 |
| INADL        | 0.203440116 | 0.160824353 | ERBB2    | 19.23653766 | 13.58668708 |
| BFSP1        | 1.865448923 | 1.192487903 | BPNT1    | 7.870661321 | 10.81069023 |
| CLPTM1L      | 88.18773304 | 89.52970504 | NCAM1    | 16.98630469 | 14.74211238 |
| AP4M1        | 13.69966512 | 11.75646442 | ROMO1    | 109.9752604 | 110.6583174 |
| NKX3-2       | 2.719586925 | 2.450455866 | NCAM2    | 2.19693255  | 1.914846502 |
| NKX3-1       | 5.531053948 | 2.926437532 | NEGR1    | 1.951147989 | 1.519903697 |
| VPS9D1       | 2.878042094 | 1.813699201 | LG14     | 0.531728064 | 0.318352086 |
| SRSF1        | 40.15670851 | 51.52435973 | PRAF2    | 106.0281771 | 83.22156044 |
| MTHFSD       | 4.09496628  | 4.539842283 | LG12     | 0.485188518 | 0.603249454 |
| E2F1         | 34.17618945 | 34.92730046 | NAP1L1   | 66.18202431 | 89.97283149 |
| E2F2         | 4.291716744 | 5.693054519 | NAP1L4   | 29.72749553 | 33.89428801 |
| E2F3         | 8.179465914 | 9.319851644 | FMNL3    | 4.254431102 | 4.242933141 |
| E2F4         | 31.79027895 | 33.37876623 | FMNL1    | 0.662696451 | 0.585868172 |
| E2F5         | 10.85577188 | 14.53977057 | FMNL2    | 13.430078   | 13.76593327 |
| E2F6         | 3.081551548 | 3.43309899  | ALOX5AP  | 0.227020237 | 0.281389566 |
| E2F7         | 3.954945827 | 4.189985575 | IFT172   | 2.592231788 | 2.90019321  |
| E2F8         | 3.227408235 | 4.316832113 | FAM110A  | 10.08237347 | 10.0633091  |
| STYK1        | 0.152038007 | 0.124770729 | ZC3H12C  | 1.391287843 | 1.458308349 |
| MAP1LC3B2    | 2.035684599 | 1.526698699 | FAM110C  | 0.113109078 | 0.1         |
| KCP          | 0.12195279  | 0.107837348 | ZC3H12A  | 2.622842711 | 2.302932232 |
| ICAM3        | 10.28595262 | 11.14489218 | CKMT1B   | 0.1         | 0.141702267 |
| ICAM5        | 2.574694406 | 2.633079302 | SMCO2    | 0.426737591 | 0.449944964 |
| IKZF2        | 0.562474276 | 0.562948661 | STRA13   | 33.57722374 | 42.55043586 |
| GAREML       | 1.399537469 | 1.078244444 | SMCO4    | 4.730902763 | 2.8744612   |
| IKZF4        | 1.014937184 | 1.018677753 | ESX1     | 0.1         | 0.1         |
| IKZF5        | 1.615614341 | 1.972086325 | CH25H    | 2.211227511 | 1.095997205 |
| ICAM1        | 3.07687539  | 2.271254336 | ZC3H11A  | 24.36664485 | 26.26130884 |
| KDR          | 0.134319588 | 0.161262042 | MPPE1    | 3.985138642 | 3.33640376  |
| TMEM63A      | 7.904941454 | 5.089760956 | MEPCE    | 30.61923202 | 33.06851139 |
| TMEM63B      | 12.70716804 | 11.80879747 | LYPD1    | 2.365486174 | 2.989556739 |
| BRI3BP       | 5.94043444  | 8.527841214 | LYPD3    | 0.678589837 | 0.774044051 |
| MON1A        | 11.16585496 | 12.97483615 | LYPD5    | 0.262920508 | 0.216328236 |
| MON1B        | 11.02972544 | 9.93017669  | LYPD6    | 1.606751635 | 1.573641015 |
| AP4E1        | 1.685655313 | 1.702564242 | DEDD2    | 10.84942472 | 10.85272866 |
| LOC100996693 | 1.311134064 | 0.691686086 | JAG2     | 0.607493194 | 0.665789338 |
| KHK          | 0.594774066 | 0.929434772 | JAG1     | 9.870692813 | 7.293306653 |
| UIMC1        | 14.38660117 | 15.33510396 | LNPEP    | 3.784240448 | 2.158020853 |
| PHGDH        | 49.73087254 | 41.42823973 | FAM111B  | 5.62921482  | 8.027172271 |

|              |             |             |           |             |             |
|--------------|-------------|-------------|-----------|-------------|-------------|
| KIN          | 1.261875603 | 1.561953374 | FAM111A   | 3.860805784 | 3.471305988 |
| KIT          | 0.1         | 0.12149971  | AGO3      | 3.449508069 | 2.414149234 |
| SGSM1        | 0.1336472   | 0.142043258 | AGO4      | 3.440303037 | 3.257285635 |
| SGSM3        | 10.5284932  | 9.904078715 | AGO1      | 2.594773947 | 2.287851347 |
| SGSM2        | 15.1826288  | 15.70134747 | AGO2      | 16.9025273  | 16.25185979 |
| FAM3A        | 53.43628227 | 48.32435508 | NMT1      | 31.58817031 | 29.01438848 |
| FAM3C        | 3.492569622 | 4.463161167 | NMT2      | 10.13934549 | 11.06368341 |
| MMGT1        | 14.93915313 | 19.03348065 | LGMN      | 31.58127956 | 27.60937473 |
| ACOT11       | 0.475630107 | 0.578107769 | FAM115A   | 2.003973502 | 1.621313971 |
| ACOT13       | 9.402765638 | 10.18589956 | PPP2R4    | 72.3863868  | 70.52156706 |
| KMO          | 3.345721634 | 2.424548963 | JAK2      | 3.37957529  | 2.76428334  |
| CCNB1IP1     | 23.17918532 | 31.38582699 | JAK1      | 100.4041081 | 85.31454205 |
| TSG101       | 33.40465741 | 31.854315   | MAMDC4    | 0.511635801 | 0.424320579 |
| AP4B1        | 7.266335233 | 7.569337653 | IFT140    | 3.285862281 | 2.7431209   |
| UVSSA        | 2.316142362 | 2.183316514 | MAMDC2    | 0.1         | 0.1         |
| AC005594.3   | 0.353750946 | 0.305340549 | SDHAF2    | 27.54595765 | 29.09978701 |
| LMNB2        | 51.36888509 | 63.65690789 | AGPS      | 2.587425786 | 2.766521274 |
| LTB4R        | 0.858676507 | 1.045841048 | SDHAF1    | 4.509657462 | 5.610008769 |
| LMNB1        | 33.8232944  | 46.05621645 | TP53I13   | 16.45148487 | 14.04877401 |
| MKL2         | 1.713357778 | 1.586409152 | FAM117B   | 0.252983147 | 0.40842196  |
| MKKS         | 9.897976993 | 12.7869298  | FAM117A   | 0.298035363 | 0.304245727 |
| MKL1         | 15.10576141 | 13.10595041 | AGR2      | 0.1         | 0.1         |
| SFSWAP       | 9.574814391 | 9.708532912 | TP53I11   | 0.113820505 | 0.119736188 |
| NT5C2        | 29.65456736 | 22.86555579 | JAM2      | 6.307259116 | 5.037887616 |
| TRDMT1       | 0.709597774 | 0.975364287 | C10orf2   | 8.758546163 | 12.76581107 |
| URGCP        | 16.14998801 | 14.770339   | CKMT1A    | 0.1         | 0.120851133 |
| YY1AP1       | 46.32210232 | 46.85988742 | DCBLD1    | 10.31081842 | 10.90896344 |
| WDR86        | 0.416240442 | 0.363435066 | DCBLD2    | 49.62125663 | 39.44672509 |
| LOC102724258 | 3.788383713 | 3.01374115  | CCDC9     | 12.74422614 | 8.811165601 |
| WDR83        | 5.28440135  | 6.584458505 | CCDC7     | 0.366364268 | 0.495007883 |
| LOC102724257 | 0.170778307 | 0.403222067 | CCDC6     | 8.650072871 | 9.031373802 |
| WDR89        | 2.93422133  | 3.226595021 | CCDC3     | 3.009774823 | 2.413472065 |
| WDR88        | 0.1862405   | 0.210839142 | AGRN      | 22.25994815 | 9.309273217 |
| WDR92        | 3.791274943 | 4.948272596 | LGR6      | 0.115023504 | 0.1         |
| WDR90        | 2.401046838 | 3.265760671 | LGR4      | 7.020896247 | 6.420218136 |
| WDR91        | 2.236986929 | 2.252248654 | LINC00984 | 1.454257534 | 1.661123828 |
| WDR74        | 16.61810913 | 22.38626433 | GZF1      | 5.965638145 | 6.169816515 |
| WDR75        | 12.88382208 | 16.19171008 | C6orf1    | 62.94922808 | 44.25674541 |
| WDR73        | 4.961185396 | 4.612268383 | FAM118A   | 2.167237835 | 1.905317546 |
| WDR78        | 1.66244442  | 1.410846474 | ATP11C    | 11.94118322 | 11.80667711 |
| HCFC2        | 2.736982662 | 2.500477176 | ATP11B    | 3.293856381 | 3.142792118 |
| KNSTRN       | 21.33537195 | 26.81217869 | ATP11A    | 4.253826089 | 4.357906479 |
| WDR76        | 6.872888108 | 7.524360054 | FAM118B   | 10.96253973 | 10.96202378 |
| WDR77        | 40.25005251 | 50.59612821 | UQCRB     | 29.90410899 | 41.80461744 |
| HCFC1        | 18.21330253 | 18.74571592 | UAP1      | 340.2750212 | 284.4308773 |
| WDR81        | 21.73817199 | 17.35372848 | UQCRH     | 217.739506  | 298.5833728 |
| WDR82        | 37.13888806 | 40.26229968 | ARL17B    | 0.125693015 | 0.155035855 |
| PARD3        | 9.470246962 | 8.950754458 | ARL17A    | 0.149252253 | 0.219567847 |

|                  |             |             |           |             |             |
|------------------|-------------|-------------|-----------|-------------|-------------|
| LOC10272427<br>2 | 0.449134926 | 0.449004252 | KHDC1     | 1.335205187 | 1.422938794 |
| WDR61            | 13.54765549 | 12.41608035 | SH3BP5L   | 17.35722808 | 15.32469548 |
| WDR62            | 18.11050593 | 18.87770014 | UQCRQ     | 58.11499069 | 66.19080459 |
| WDR66            | 0.127545746 | 0.149170422 | UFD1L     | 17.11586597 | 17.71954563 |
| BLOC1S4          | 9.777857548 | 11.80889592 | PTEN      | 5.652044868 | 5.109781691 |
| BLOC1S5          | 1.46076183  | 1.95004991  | ETFA      | 38.8621705  | 45.84490899 |
| BLOC1S6          | 5.161986896 | 6.707486591 | ETFB      | 36.63760064 | 32.46116726 |
| WDR70            | 16.53505351 | 18.64708309 | PTER      | 0.453040565 | 0.51689732  |
| BLOC1S1          | 29.62759857 | 28.06397307 | ETF1      | 68.03021041 | 77.04196566 |
| BLOC1S2          | 5.22983884  | 5.734051092 | SMCR8     | 16.19801904 | 12.54060663 |
| BLOC1S3          | 11.38941211 | 9.544745388 | ATP10D    | 1.741818982 | 1.045759657 |
| WDR59            | 3.73324847  | 5.029985644 | ATP10A    | 0.1         | 0.1         |
| WDR52            | 0.444350018 | 0.4868872   | ARL13B    | 2.614822286 | 2.518982494 |
| WDR53            | 4.958752523 | 7.346397709 | NNAT      | 0.299199682 | 0.384464465 |
| LOC10272428<br>5 | 3.306868949 | 2.913137823 | SEPT10    | 12.65701934 | 13.45207701 |
| WDR54            | 14.21274847 | 13.50647423 | SEPT1     | 25.09358156 | 24.80507358 |
| WDR55            | 26.41323498 | 26.17473322 | CNBP      | 82.41759667 | 97.02275925 |
| XKR8             | 3.590702114 | 3.451882486 | ACPL2     | 2.866725026 | 2.37611092  |
| XKR9             | 0.257810683 | 0.291555536 | GZMM      | 0.210417167 | 0.1         |
| WDR60            | 3.263567303 | 3.478446694 | OCIAD1    | 24.26688997 | 28.83542273 |
| WDR5B            | 1.577934965 | 1.722814346 | OCIAD2    | 0.164777153 | 0.1         |
| MKS1             | 2.418092843 | 2.250162259 | ANPEP     | 605.8136156 | 497.2241192 |
| XKR5             | 0.1         | 0.107581068 | C6orf106  | 51.1246229  | 36.68327339 |
| FANK1            | 0.981179477 | 0.920667393 | C6orf120  | 7.19223897  | 6.935490342 |
| WDR47            | 9.633106812 | 9.687180517 | ROPN1     | 0.1         | 0.1         |
| WDR48            | 8.637447615 | 8.603448496 | DECR2     | 5.465782556 | 5.571565257 |
| PHF20            | 12.23872595 | 12.60329765 | DECR1     | 52.13433257 | 46.4158174  |
| PHF23            | 60.34001778 | 59.95690929 | PTK6      | 0.1         | 0.1         |
| WDR41            | 10.39683246 | 9.902836722 | CNFN      | 1.088692122 | 0.549237307 |
| WDR45            | 41.08530822 | 33.92518161 | PTK2      | 56.38974953 | 51.003979   |
| WDR46            | 10.15827728 | 11.55555132 | MED13L    | 12.59845459 | 10.18561767 |
| WDR43            | 12.43119428 | 16.70284444 | NDUFAF6   | 7.801525083 | 10.84545516 |
| WDR44            | 4.898007977 | 4.679747548 | NDUFAF7   | 3.882974036 | 5.015690045 |
| WDR38            | 0.453143121 | 0.632318095 | PTK7      | 45.34004251 | 36.15243906 |
| HELLS            | 4.448464122 | 5.516618789 | NDUFAF4   | 4.84047322  | 8.300410855 |
| WDR36            | 7.878505821 | 9.542356013 | NDUFAF5   | 3.882226859 | 5.237309207 |
| WDR37            | 3.739180755 | 3.486823674 | NDUFAF2   | 33.26500157 | 50.55632061 |
| WDR31            | 0.198247845 | 0.154561707 | NDUFAF3   | 55.77282287 | 53.88922505 |
| WDR34            | 71.91163864 | 75.49215842 | NDUFAF1   | 6.252519804 | 5.371614604 |
| WDR35            | 2.380204271 | 3.361553538 | SPAG16    | 1.36843783  | 1.505377797 |
| WDR33            | 7.943413939 | 8.491679123 | SPATC1L   | 9.11744963  | 10.35054678 |
| KIFC2            | 17.31241215 | 16.11647935 | PTMS      | 624.5091742 | 577.2852257 |
| KIFC1            | 24.28046347 | 28.31228206 | SYNCRIP   | 32.86730379 | 40.83372751 |
| KIFC3            | 7.260318031 | 6.52599478  | PPP3CA    | 9.077038451 | 8.50092429  |
| WDR27            | 2.674422968 | 2.609432734 | PPP3CB    | 11.31487884 | 11.59330355 |
| WDR25            | 7.815536184 | 5.906347558 | PPP3CC    | 12.88868743 | 12.88074124 |
| WDR26            | 18.02440013 | 17.43796009 | CTTNBP2NL | 10.93932576 | 9.700473178 |
| AP5Z1            | 20.79955754 | 14.25479506 | ARHGEF9   | 3.970131826 | 3.496328242 |



|              |             |             |          |             |             |
|--------------|-------------|-------------|----------|-------------|-------------|
| WDR20        | 8.192291657 | 7.651154874 | ARHGEF3  | 5.327156845 | 5.561212628 |
| LOC102724230 | 0.1         | 0.1         | ARHGEF4  | 0.1         | 0.111018615 |
| WDR24        | 6.665722209 | 6.510903285 | ARHGEF1  | 16.06624166 | 15.84542352 |
| LOC102724232 | 2.424441923 | 2.506556642 | ARHGEF2  | 74.14886239 | 61.83305176 |
| WDR17        | 0.32103987  | 0.386060582 | ARHGEF7  | 10.63129959 | 10.59378855 |
| WDR18        | 15.80931586 | 20.28534897 | PTMA     | 945.2863952 | 1038.398875 |
| WDR19        | 7.099630017 | 6.090871971 | ARHGEF5  | 0.1         | 0.1         |
| WDR12        | 12.07474658 | 16.50140827 | ARHGEF6  | 0.701105443 | 0.726210317 |
| WDR13        | 26.16011211 | 27.10636245 | AHCY     | 157.4516025 | 179.7347635 |
| WDR11        | 8.836312581 | 7.578376708 | C6orf141 | 0.122373504 | 0.147925279 |
| PHF5A        | 26.24637038 | 30.64608801 | SPRYD3   | 22.54961389 | 17.76147885 |
| LOC102724249 | 5.383180709 | 4.039945334 | SPRYD4   | 6.905198123 | 9.395548049 |
| LOC102724248 | 0.286959161 | 0.25017881  | SPRYD7   | 8.388199355 | 9.06374793  |
| N6AMT1       | 1.78490628  | 2.191022495 | KAZALD1  | 2.048343196 | 1.32577103  |
| N6AMT2       | 9.930230162 | 11.0751088  | NDUFAB1  | 43.32782417 | 69.28312252 |
| PARK7        | 215.3191535 | 241.6847377 | NEK10    | 0.892512455 | 0.502064427 |
| SLC26A11     | 3.785967443 | 4.656077305 | C6orf136 | 3.775178765 | 4.57979066  |
| AP5S1        | 17.88536064 | 16.16783014 | C6orf132 | 0.169350563 | 0.122007811 |
| IFNAR2       | 3.55057369  | 4.639845692 | NEK11    | 2.193532665 | 2.059596994 |
| ADTRP        | 0.575334612 | 0.678972454 | PRDM8    | 11.37005496 | 11.31514687 |
| IFNAR1       | 4.412936202 | 4.597553536 | PRDM4    | 15.8113705  | 14.23741046 |
| PARM1        | 0.675637418 | 0.452299164 | PRDM5    | 0.766297006 | 0.63255407  |
| FAM149B1     | 6.335885427 | 5.768738926 | PRDM2    | 3.162102413 | 3.13951192  |
| SLC38A10     | 29.11369128 | 23.89997131 | PRDM1    | 1.084786528 | 0.895106799 |
| ORC5         | 8.723169059 | 11.12594725 | CELSR1   | 1.997596911 | 1.669882175 |
| ORC4         | 3.196946466 | 3.533007033 | CELSR2   | 0.676688748 | 0.56455692  |
| ORC6         | 9.092159382 | 12.45739264 | ETS1     | 34.42034952 | 30.81130889 |
| ORC1         | 13.82143226 | 17.7867419  | CELSR3   | 2.914280846 | 2.373033256 |
| ORC3         | 15.64908173 | 17.89828781 | ETS2     | 32.39796107 | 26.39388304 |
| ORC2         | 3.314947589 | 4.78247826  | GNPTAB   | 5.451996562 | 5.950731716 |
| DRD2         | 0.234738399 | 0.127487341 | PTRF     | 366.0748736 | 254.4308323 |
| OSBPL9       | 19.96059565 | 19.65321963 | SLFN12   | 2.420353478 | 1.83008364  |
| FANCI        | 15.01042125 | 17.1356657  | SLFN13   | 0.192014306 | 0.152559924 |
| OSBPL8       | 6.783086951 | 7.699607963 | SLFN11   | 5.746664076 | 5.150313478 |
| UVRAG        | 4.94717683  | 5.15503155  | NNMT     | 114.5376672 | 111.5470481 |
| CHTOP        | 31.00132682 | 33.68314623 | PLGRKT   | 12.06111417 | 10.5464796  |
| OSBPL7       | 0.185259207 | 0.120292213 | UBA7     | 2.577603912 | 0.805382574 |
| OSBPL6       | 6.036882022 | 5.828298887 | NDUFB10  | 99.15774333 | 125.1131942 |
| OSBPL5       | 1.142500541 | 0.901623349 | UBA6     | 6.498218384 | 6.607445625 |
| FANCM        | 2.191753155 | 2.087930903 | NDUFB11  | 86.39273498 | 103.1320167 |
| FANCL        | 3.99934527  | 4.854564025 | UBA5     | 6.040431883 | 6.540913978 |
| OSBPL3       | 5.643691852 | 6.314268876 | SLC41A2  | 1.981490645 | 1.190540037 |
| OSBPL2       | 10.38661195 | 9.35966592  | SLC41A3  | 9.123465733 | 9.06955572  |
| FANCA        | 6.498830418 | 6.943140466 | SLC41A1  | 9.839526586 | 9.499634197 |
| LOC102724200 | 0.37545746  | 0.513031543 | CNN3     | 207.7083228 | 177.3862279 |

|           |             |             |                  |             |             |
|-----------|-------------|-------------|------------------|-------------|-------------|
| FANCC     | 4.534865108 | 4.728692774 | CNN2             | 100.4517751 | 89.39462215 |
| FANCB     | 1.568038079 | 2.159416806 | C6orf165         | 1.319623658 | 0.585657255 |
| FANCE     | 3.345702611 | 4.448872548 | LHFP             | 31.1311381  | 21.74112846 |
| FANCG     | 14.06030134 | 17.06095854 | AHI1             | 5.885003004 | 5.031191937 |
| FANCF     | 1.198999513 | 1.26584868  | UBA3             | 18.87993306 | 20.03877078 |
| MAP3K15   | 1.995049818 | 2.357836145 | UBA2             | 40.96655721 | 48.66434169 |
| MAP3K10   | 9.171817865 | 8.056461138 | UBA1             | 156.4456244 | 151.7247984 |
| MAP3K13   | 1.31193527  | 1.30476779  | RNF103-<br>CHMP3 | 7.616223885 | 7.611211235 |
| MAP3K14   | 11.29719779 | 9.08296504  | PODXL2           | 13.19952978 | 21.07356883 |
| MAP3K11   | 46.97091234 | 39.4725794  | ACOXL            | 0.1         | 0.11563176  |
| BCL2L2    | 9.049165881 | 9.247493406 | ETV1             | 3.944852217 | 4.626468736 |
| LAT       | 0.815336    | 0.610763045 | ETV2             | 0.433234618 | 0.456903459 |
| MAP3K12   | 13.53771636 | 12.69578569 | ETV3             | 5.538530459 | 4.438062259 |
| BCL2L1    | 39.24109496 | 31.22199092 | ETV4             | 7.304765572 | 8.373678217 |
| LBH       | 0.153047594 | 0.137876957 | ETV5             | 21.89623298 | 18.24919345 |
| PHACTR2   | 3.966818809 | 2.876382623 | ETV6             | 4.636736994 | 3.456994167 |
| LBR       | 11.44693075 | 15.32384168 | ETV7             | 0.830884594 | 0.28787141  |
| PHACTR4   | 8.338932188 | 7.332496416 | ACOX1            | 3.253634677 | 2.667285376 |
| CKAP2L    | 16.13140536 | 18.23341457 | PTGES3L          | 0.177693834 | 0.192458041 |
| PLRG1     | 18.60319454 | 20.6023146  | ACOX3            | 6.010411764 | 5.79022228  |
| TIRAP     | 2.334701437 | 2.216958376 | BNIP1            | 6.547056017 | 7.540244009 |
| DNAJC3    | 10.02379964 | 7.948756678 | BNIP2            | 6.393656902 | 7.511829931 |
| DNAJC2    | 15.27202754 | 18.99924289 | PTK2B            | 0.716371083 | 0.516523476 |
| DNAJC1    | 21.11902454 | 19.27685014 | NIPSNAP3A        | 9.993966405 | 8.618256164 |
| ACTBL2    | 0.155781615 | 0.1         | BNIP3            | 24.24684517 | 28.39216064 |
| DNAJC7    | 24.29934784 | 29.86784454 | ERCC3            | 21.10499162 | 21.02589278 |
| LCK       | 0.1         | 0.1         | ERCC4            | 1.383221898 | 1.433217332 |
| DNAJC6    | 3.790908418 | 2.511618042 | ERCC1            | 38.96361051 | 36.07541841 |
| DNAJC5    | 30.90957083 | 30.0668722  | ERCC2            | 47.37808968 | 41.0653642  |
| DNAJC4    | 32.11977538 | 27.00409562 | ERCC8            | 5.513709391 | 5.762123213 |
| DNAJC9    | 29.88564905 | 31.15028289 | PTX3             | 1.413525579 | 0.387106549 |
| DNAJC8    | 110.2720282 | 126.262198  | ERCC5            | 7.781412801 | 7.954701038 |
| NSRP1     | 14.72485252 | 16.89930627 | ERCC6            | 5.697774646 | 4.418646946 |
| DNAJB2    | 9.476166469 | 7.198339639 | PI4K2B           | 8.409896012 | 6.538171024 |
| DNAJB1    | 76.12625899 | 80.16088992 | CNTF             | 0.401723362 | 0.530872046 |
| DNAJB6    | 47.87587143 | 49.53891291 | MRGPRF           | 1.965967898 | 1.237359453 |
| DNAJB5    | 6.561416865 | 7.404819715 | FAM122B          | 16.46337386 | 18.46887113 |
| DNAJB4    | 14.85496219 | 12.55554373 | FAM122A          | 4.816366615 | 3.844007996 |
| DNAJB9    | 5.319690949 | 3.81233972  | CNST             | 3.852643359 | 3.786024539 |
| DNAJB7    | 0.180607102 | 0.186332427 | FAM122C          | 3.903834048 | 4.336381095 |
| LOC390937 | 0.173170813 | 0.256735913 | LUC7L            | 4.138091009 | 5.160435106 |
| RPRD2     | 8.285698073 | 8.326280106 | PI4K2A           | 12.58816837 | 12.09245086 |
| DNAJA1    | 243.6089439 | 233.2529938 | BCL10            | 9.285588103 | 9.334715122 |
| DNAJA4    | 0.116306113 | 0.158214322 | FAM124A          | 1.212787451 | 1.333445346 |
| DNAJA3    | 25.18252026 | 31.0722191  | LHPP             | 2.414359349 | 2.665716066 |
| DNAJA2    | 16.30920748 | 18.42802305 | NDFIP2           | 4.385561839 | 4.116210473 |
| DRG1      | 46.21123687 | 48.91080625 | NDFIP1           | 16.89714627 | 17.94067486 |
| DRG2      | 23.87040166 | 26.48336301 | ARL2BP           | 28.27738308 | 24.97075523 |
| IFITM3    | 2084.761646 | 1836.649937 | FAM127C          | 19.59770011 | 18.14531744 |

|         |             |             |                  |             |             |
|---------|-------------|-------------|------------------|-------------|-------------|
| VEZT    | 6.410763415 | 5.884638633 | FAM127B          | 129.3184937 | 141.0578315 |
| IFITM1  | 951.1634053 | 510.5716006 | FAM127A          | 247.6620337 | 207.4874001 |
| IFITM2  | 0.740495196 | 0.608139263 | IFIH1            | 39.1644741  | 12.59867321 |
| PARS2   | 5.848171468 | 5.152642082 | UBL5             | 114.2126315 | 140.7576475 |
| HS6ST1  | 8.486871131 | 7.815436385 | UBL3             | 18.1502596  | 16.05236921 |
| HS6ST2  | 0.111375362 | 0.1         | UBL7             | 31.19597476 | 33.00412747 |
| HS6ST3  | 2.223585002 | 2.025056035 | FAM126B          | 1.825586185 | 1.479157362 |
| RPS15   | 974.4554942 | 1215.824621 | FAM126A          | 10.26768713 | 10.17241806 |
| RPS14   | 634.5352915 | 920.4638712 | AHRR             | 16.90317756 | 13.7883436  |
| RPS17   | 503.9738286 | 760.9510621 | LINC00843        | 2.154570276 | 2.240623795 |
| RPS16   | 513.0829822 | 698.3823077 | C1QTNF9B-<br>AS1 | 4.558505114 | 6.143949961 |
| RPS19   | 434.6182777 | 563.9400642 | FAM129A          | 30.88759849 | 28.55536122 |
| RPS18   | 312.3669995 | 410.5161168 | FAM129B          | 235.9960264 | 199.4288619 |
| RPS11   | 917.77186   | 1183.438354 | PPP1R2           | 5.422569503 | 6.244892174 |
| RPS10   | 228.6595125 | 319.5478758 | RPS15A           | 366.246477  | 550.9791087 |
| RPS13   | 247.3841501 | 346.4290865 | PPP1R7           | 15.67782104 | 15.93386351 |
| RPS12   | 513.3125155 | 740.1396771 | UBN2             | 0.488447654 | 0.421017085 |
| SRRM2   | 37.66297911 | 34.69377538 | PPP1R8           | 28.76209978 | 31.8511554  |
| SRRM3   | 1.148795138 | 1.228417666 | UBN1             | 12.25793322 | 11.25118742 |
| SRRM5   | 0.403301867 | 0.409375865 | FDX1L            | 23.48424462 | 22.92040152 |
| HLA-B   | 13.48439388 | 5.448607506 | CPSF4L           | 2.508869102 | 2.67996519  |
| HLA-C   | 55.89871007 | 32.47252289 | POGLUT1          | 5.851950416 | 6.093997472 |
| HLA-A   | 24.36650275 | 16.43662998 | UBP1             | 27.115165   | 29.11894147 |
| HLA-F   | 0.1         | 0.1         | LOC10012810<br>8 | 1.034655658 | 1.156655408 |
| SRRM1   | 22.84023868 | 24.44599315 | PPP1CB           | 15.87501671 | 15.43314811 |
| HLA-E   | 81.7154171  | 39.43068521 | PPP1CC           | 48.30648162 | 66.00086631 |
| WBSCR17 | 0.1         | 0.1         | HMCES            | 21.26961565 | 21.6385481  |
| WBSCR16 | 21.76424019 | 20.76062352 | SSUH2            | 0.228184328 | 0.243826517 |
| MTHFD2L | 5.186139005 | 5.489750641 | THOC1            | 7.01050005  | 8.376198396 |
| CSTF3   | 9.246221983 | 11.09816404 | TRAFD1           | 26.83554235 | 24.14878153 |
| LHB     | 0.1         | 0.45462874  | THOC3            | 17.39545948 | 20.60489511 |
| CSTF2   | 11.71627462 | 13.47008369 | THOC2            | 10.4871868  | 11.36738036 |
| FXR1    | 15.23472282 | 16.76760648 | THOC5            | 29.97294419 | 32.24553573 |
| HELZ2   | 77.46075978 | 35.36578946 | THOC7            | 26.69031179 | 32.61022452 |
| WBSCR28 | 0.70832877  | 0.317178959 | THOC6            | 15.46587065 | 19.92709305 |
| SCFD1   | 19.22402583 | 17.65868054 | MORF4L1          | 59.64375589 | 65.69243698 |
| WBSCR27 | 18.51452353 | 14.60298226 | MORF4L2          | 125.5595243 | 141.2912657 |
| FXR2    | 36.93722954 | 36.28761307 | C20orf96         | 3.813072331 | 4.065472865 |
| AP5M1   | 6.025299119 | 6.296343752 | UBR4             | 12.05940129 | 8.937112422 |
| CHTF8   | 32.47182854 | 32.29733028 | UBR3             | 2.833935951 | 2.840331526 |
| SCFD2   | 13.69304508 | 13.54313138 | UBR2             | 4.384370426 | 4.097499315 |
| WBSCR22 | 50.8927816  | 55.2113326  | UBR1             | 2.594304986 | 2.512940082 |
| CSTF1   | 22.41914525 | 25.93657377 | UBR7             | 16.34356386 | 18.91820991 |
| MLEC    | 23.96043844 | 22.09124925 | UBR5             | 17.16888703 | 16.56130307 |
| LIF     | 34.77345243 | 25.49300819 | COA4             | 85.49848835 | 104.617467  |
| PARVA   | 2.942156109 | 2.388870444 | COA3             | 27.55444959 | 30.72105054 |
| PARVB   | 8.007432259 | 10.48399756 | COA1             | 12.75108222 | 16.70533071 |
| RPS26   | 10.61213522 | 18.81025391 | LHX2             | 2.615852403 | 2.26484993  |

|                  |             |             |          |             |             |
|------------------|-------------|-------------|----------|-------------|-------------|
| RPS25            | 423.4184337 | 718.9879562 | LHX6     | 0.114459025 | 0.151620048 |
| RPS28            | 11.93183533 | 18.16155735 | LHX4     | 0.321186916 | 0.356638723 |
| RPS27            | 451.9725032 | 610.3043176 | LHX9     | 1.38913876  | 1.223406752 |
| RPS29            | 64.02872839 | 103.4862156 | LHX8     | 0.910028339 | 1.100432632 |
| RPS20            | 808.8577867 | 1100.804384 | NOB1     | 33.70003716 | 39.38846896 |
| RPS21            | 465.8248315 | 664.2354499 | UBTF     | 23.05545719 | 25.50991211 |
| RPS24            | 128.1469296 | 209.4323127 | COA7     | 16.29483989 | 19.33141255 |
| RPS23            | 127.799186  | 195.8461612 | COA6     | 25.96852245 | 29.96653998 |
| AHCTF1           | 11.40262166 | 14.17722982 | COA5     | 3.951509498 | 4.487482021 |
| UBXN1            | 55.08464791 | 60.71729594 | PLA2G12A | 2.442025094 | 2.66505982  |
| LOC10099657<br>3 | 0.530667632 | 0.464449898 | COBL     | 0.109416581 | 0.113447224 |
| LOC10099657<br>4 | 6.38565013  | 5.61545911  | C1QL4    | 1.257268155 | 1.070016936 |
| UBXN8            | 11.20682473 | 16.72841932 | SMC1A    | 19.02847131 | 20.02177122 |
| UBXN7            | 4.001825866 | 3.065968139 | C1QL3    | 0.162516579 | 0.2041553   |
| UBXN4            | 15.25569141 | 15.87472388 | C1QL2    | 0.1         | 0.1         |
| UBXN6            | 33.16976848 | 28.88429814 | SMC1B    | 0.173291244 | 0.213384472 |
| PARP6            | 18.55816617 | 14.50159129 | C1QL1    | 11.94489115 | 9.249894323 |
| PARP3            | 6.491482025 | 4.941549292 | NOA1     | 13.27074628 | 17.50421705 |
| PARP4            | 19.4214294  | 16.88699237 | LCORL    | 4.055837866 | 4.623678802 |
| PARP1            | 73.95294456 | 90.58742519 | NOD1     | 2.10910234  | 1.787209931 |
| PARP2            | 14.88422668 | 19.05006687 | COCH     | 4.029694095 | 4.60484322  |
| PARP9            | 25.89612739 | 14.50460122 | MACC1    | 0.1         | 0.1         |
| MLF1             | 5.190029914 | 7.236323124 | BCKDK    | 30.13396652 | 29.56155296 |
| PARP8            | 2.834277736 | 2.412912181 | RSC1A1   | 4.947665004 | 4.381635146 |
| MLF2             | 179.0677465 | 194.4317784 | IFIT5    | 29.66869904 | 10.72066483 |
| AMIGO3           | 3.665969214 | 2.346618409 | IFIT1    | 117.2437117 | 30.35256769 |
| AMIGO1           | 2.791122401 | 1.96146362  | IFIT3    | 200.4659793 | 58.2803464  |
| ICA1L            | 0.368079312 | 0.447215284 | IFIT2    | 65.84549301 | 18.56748187 |
| AMIGO2           | 16.35080215 | 15.88598186 | HMCN1    | 1.047058201 | 0.692708234 |
| DRP2             | 0.33355449  | 0.355354614 | COG8     | 9.636547036 | 10.90860073 |
| MTHFD1L          | 17.83545176 | 20.01797764 | COG7     | 7.193748663 | 5.748542707 |
| RPRML            | 0.1         | 0.1         | COG6     | 5.84161916  | 5.166313737 |
| MLH1             | 19.51830225 | 21.08565524 | ARRDC1   | 5.461649931 | 4.594678818 |
| MLH3             | 1.586953976 | 1.561029088 | COG5     | 6.518265775 | 5.920104788 |
| ATAT1            | 2.962230336 | 3.77692288  | ARRDC2   | 2.031732609 | 2.535771988 |
| DOCK10           | 4.307029355 | 3.672067414 | COG4     | 22.08080252 | 19.02827757 |
| DOCK11           | 5.850748006 | 6.928749285 | ARRDC3   | 23.19777996 | 16.49417726 |
| AP5B1            | 9.237753039 | 8.019421679 | COG3     | 8.102938229 | 6.532561019 |
| LOX              | 71.44896258 | 46.65221125 | COG2     | 5.470638768 | 6.791988087 |
| CERCAM           | 9.078520222 | 8.943232725 | COG1     | 10.83260318 | 9.144376596 |
| LPP              | 1.142088898 | 0.959294152 | YOD1     | 1.743348294 | 2.346523178 |
| CDH24            | 4.735112525 | 4.63106336  | CRNKL1   | 5.279823673 | 5.765413098 |
| MLKL             | 0.276905597 | 0.142104615 | NEIL3    | 2.9981978   | 3.466581276 |
| BLMH             | 6.325143161 | 7.264423108 | NEIL2    | 9.48377035  | 10.60956347 |
| GPSM1            | 8.522598992 | 10.05508176 | NEIL1    | 0.494733215 | 0.616719073 |
| GPSM2            | 16.55823403 | 18.34218537 | MACF1    | 8.506492209 | 6.910751929 |
| LOC10272417<br>0 | 1.128139358 | 1.136391139 | APCDD1   | 1.397768043 | 0.737058279 |

|              |             |             |              |             |             |
|--------------|-------------|-------------|--------------|-------------|-------------|
| ASNSD1       | 10.46502612 | 13.86582371 | LIAS         | 2.473559199 | 3.807298161 |
| MLNR         | 0.1         | 0.159877589 | PUM1         | 24.52722995 | 25.25652644 |
| MFSD8        | 1.851629727 | 1.659691239 | TRERF1       | 3.915246287 | 4.242076678 |
| RPS4X        | 753.0674621 | 1072.959513 | PUM2         | 11.96874299 | 11.84648596 |
| MFSD9        | 0.926912793 | 0.848336871 | ATP5J2-PTCD1 | 5.850475404 | 6.469908276 |
| MFSD6        | 2.710018293 | 2.095058343 | COIL         | 5.247791682 | 5.49372272  |
| MFSD7        | 0.167381682 | 0.196223518 | C1QBP        | 188.8756634 | 278.0989272 |
| MFSD4        | 0.125416476 | 0.127221746 | LRRCC1       | 3.852930225 | 4.607572825 |
| MFSD5        | 38.96154808 | 33.572068   | GP1BB        | 1.238806698 | 1.610096535 |
| MFSD3        | 14.47103098 | 15.9022174  | STRADA       | 8.308751557 | 7.674061347 |
| MFSD1        | 45.78997684 | 37.86633185 | STRADB       | 6.028978638 | 5.691282584 |
| TOPBP1       | 21.89699107 | 23.71231715 | ZDHHC12      | 54.84726584 | 45.630513   |
| GPSM3        | 0.336142168 | 0.268609846 | ZDHHC13      | 4.134014523 | 4.473880728 |
| HGSNAT       | 27.60246944 | 20.60105747 | ZDHHC11      | 0.319287815 | 0.256575529 |
| LSR          | 2.312148317 | 2.575115566 | ZDHHC16      | 32.48921771 | 26.78724276 |
| RPS3A        | 134.6278482 | 207.5786284 | ZDHHC17      | 4.33580942  | 3.746439727 |
| LSS          | 28.18209118 | 25.60963273 | ZDHHC14      | 3.25605739  | 3.201188145 |
| LOC102724187 | 0.241267918 | 0.276518806 | AIDA         | 8.758546163 | 8.626969004 |
| FCHSD1       | 9.335782573 | 7.647632423 | WIBG         | 12.85475887 | 11.96045117 |
| FCHSD2       | 4.531478637 | 3.817678124 | FYTTD1       | 19.41870185 | 18.72468595 |
| DDAH1        | 23.81295221 | 19.86570676 | ZDHHC20      | 7.792695803 | 9.066360669 |
| DDAH2        | 42.95687612 | 33.93344683 | ZDHHC23      | 0.781947808 | 0.557590536 |
| CDH10        | 1.92948327  | 1.611403744 | NOL7         | 41.25673149 | 49.05852594 |
| COL6A2       | 12.32649032 | 7.54897359  | GDPD1        | 0.226517569 | 0.179043885 |
| COL6A1       | 15.78455946 | 10.00518272 | NOL8         | 7.039707055 | 8.07310554  |
| CDH11        | 35.67264297 | 28.56919528 | ZDHHC24      | 23.88634777 | 19.0548507  |
| COL6A3       | 0.374952416 | 0.303332543 | ZDHHC21      | 2.371558398 | 2.276061651 |
| TERF2IP      | 14.46594797 | 17.01984704 | NOL9         | 2.72388005  | 3.393820477 |
| CDH13        | 0.1         | 0.1         | GDPD3        | 0.415573436 | 0.381656539 |
| AKNAD1       | 0.540983742 | 0.475422511 | GDPD5        | 2.244176838 | 1.981588139 |
| LTB          | 0.1         | 0.1         | NOL3         | 5.891289892 | 6.059390631 |
| CDH18        | 1.190218404 | 0.686647397 | NOL6         | 27.50475357 | 27.21168502 |
| LTF          | 0.759889199 | 0.25705767  | PPP2CA       | 88.90660968 | 90.8354462  |
| CDH19        | 0.108324191 | 0.105943625 | PURB         | 3.785095529 | 3.857145832 |
| CHSY1        | 21.05177874 | 18.15792925 | PURA         | 3.760337422 | 4.121921304 |
| LUM          | 1.106617371 | 1.221940754 | PPP2CB       | 119.9571339 | 112.1356796 |
| MLPH         | 27.82658408 | 25.57238879 | ZDHHC18      | 17.87498295 | 14.16245866 |
| PITHD1       | 16.69775068 | 21.06035657 | WIF1         | 0.1         | 0.1         |
| PAXBPI       | 5.357282765 | 6.498096459 | KISS1R       | 0.131970017 | 0.1         |
| USP6NL       | 6.56787369  | 6.127117104 | PURG         | 0.815582327 | 0.853634919 |
| ZDBF2        | 0.180646205 | 0.16837966  | AIG1         | 4.005477285 | 3.319910044 |
| NKX1-2       | 0.1         | 0.1         | COLQ         | 0.265766678 | 0.27754068  |
| STARD3       | 15.11344243 | 13.41149153 | NDUFA13      | 143.6848947 | 164.4914892 |
| GABARAPL2    | 27.00889496 | 26.86555104 | NDUFA11      | 46.11229696 | 50.76107921 |
| STARD4       | 10.58050734 | 8.791553812 | TAMM41       | 3.217076619 | 4.479965006 |
| GABARAPL1    | 6.628636411 | 5.197968292 | NDUFA12      | 104.2698847 | 131.8701855 |
| STARD5       | 1.521159553 | 1.001985804 | NDUFA10      | 12.02289734 | 12.47730062 |
| STARD7       | 20.52751836 | 25.32622468 | ZSCAN9       | 1.596538843 | 1.499299821 |

|            |             |             |           |             |             |
|------------|-------------|-------------|-----------|-------------|-------------|
| STARD8     | 0.383599773 | 0.414992919 | ARHGDIG   | 0.265449927 | 0.37564667  |
| STARD9     | 0.710879024 | 0.711598599 | COMT      | 47.85729368 | 45.50171381 |
| DNTTIP1    | 41.94292773 | 44.1816719  | CNDP2     | 11.99974056 | 12.0698699  |
| DNTTIP2    | 34.91231786 | 41.59586187 | ARHGDIA   | 192.890288  | 183.533868  |
| CLNS1A     | 53.3755994  | 75.80127722 | ARHGDIB   | 33.80851771 | 36.70608504 |
| AKIP1      | 13.66179276 | 12.29952022 | CPSF3L    | 23.77349936 | 26.73894475 |
| CDIP1      | 9.014494535 | 8.470925748 | PUS3      | 4.776741854 | 5.048570976 |
| LXN        | 0.1         | 0.1332385   | NOM1      | 4.220539    | 4.989324849 |
| HS3ST3A1   | 1.374625711 | 1.024785306 | LIG1      | 6.00139962  | 6.522096744 |
| GUCD1      | 25.81745986 | 24.249101   | PUS1      | 8.999300177 | 11.75869275 |
| VTI1A      | 3.661223951 | 3.690303034 | LIG4      | 4.939522855 | 5.606953501 |
| PPARGC1B   | 0.99950456  | 1.150658137 | LIFR      | 2.708199224 | 2.461326819 |
| VTI1B      | 38.15596923 | 37.30564376 | ATP1B3    | 211.6339367 | 193.157819  |
| LYN        | 30.6860332  | 28.12135064 | LIG3      | 5.943421451 | 5.785444248 |
| HACE1      | 2.819962145 | 2.811175706 | ATP1B1    | 6.948122874 | 7.350223389 |
| INCA1      | 1.780963174 | 1.54934471  | PUS7      | 5.507897433 | 7.907077067 |
| APCDD1L    | 0.1         | 0.1         | COPA      | 121.0292962 | 99.20545139 |
| NROB1      | 0.689982956 | 0.778694523 | NOP2      | 37.79341402 | 48.72486522 |
| BBIP1      | 3.676038069 | 4.392145917 | NOP9      | 12.40221369 | 12.65910376 |
| PCDHGA10   | 3.306868949 | 2.558482748 | UQCC2     | 23.04708871 | 25.05123285 |
| FAM220A    | 14.08507727 | 14.30770231 | NONO      | 205.8709684 | 238.1689291 |
| PCDHGA11   | 3.171011447 | 2.437419749 | UQCC1     | 28.66471357 | 28.96617098 |
| PCDHGA12   | 3.212288482 | 2.454321816 | COQ9      | 19.63171159 | 24.91729294 |
| PQBP1      | 77.9100134  | 90.08089815 | COQ7      | 2.741334535 | 2.557138259 |
| FLVCR1     | 1.035980238 | 1.180533886 | COQ6      | 4.887319039 | 4.80726465  |
| FLVCR2     | 0.469658785 | 0.303033203 | COQ5      | 8.142803106 | 9.437738496 |
| NSUN4      | 5.878916168 | 6.492884106 | COQ4      | 17.45014021 | 19.26059983 |
| NSUN5      | 11.86175212 | 12.2423895  | COQ3      | 4.790294475 | 7.590413983 |
| NSUN2      | 52.99108359 | 60.74654155 | COQ2      | 18.3219494  | 20.41824598 |
| NSUN3      | 2.706614594 | 2.995154433 | BRWD1     | 1.125315933 | 1.159774064 |
| NSUN6      | 1.51179326  | 1.90285208  | COPE      | 136.3461179 | 121.7845663 |
| NSUN7      | 0.240484794 | 0.14012349  | ZSCAN2    | 1.876812946 | 1.856629811 |
| DYNLL1     | 308.7894789 | 320.6046002 | BRWD3     | 0.814720921 | 0.906079746 |
| DYNLL2     | 9.998732144 | 11.04302274 | ZSCAN1    | 0.82517137  | 0.938812803 |
| FAM222B    | 4.483015782 | 4.107875426 | SLC40A1   | 0.1         | 0.1         |
| FAM222A    | 1.721409281 | 2.108282882 | MAPK1IP1L | 15.29428289 | 16.35629326 |
| STYXL1     | 15.21576703 | 14.01031232 | CORT      | 0.311012498 | 0.7026672   |
| ANKIB1     | 11.08657165 | 8.792515507 | AIM1      | 3.044029654 | 2.83935682  |
| FAM228B    | 0.520812995 | 0.700936418 | AKT1S1    | 52.49711956 | 54.70285515 |
| CXCL16     | 1.5282138   | 1.040101291 | THOP1     | 46.22458473 | 53.61742641 |
| OSBP       | 22.30934977 | 17.49769667 | ATP1A3    | 0.243945604 | 0.230810662 |
| PRPF4B     | 7.467054915 | 9.207455662 | ATP1A1    | 132.7741351 | 119.681629  |
| FAM227B    | 1.497387927 | 1.612733892 | LIN9      | 3.365072914 | 5.481649953 |
| MAK        | 0.480643515 | 0.484249826 | FAM120C   | 3.050097257 | 2.65157199  |
| RBM14-RBM4 | 3.286602491 | 4.512688913 | FAM120B   | 6.197881335 | 5.966656333 |
| FSCN1      | 69.94436701 | 70.16233604 | FAM120A   | 30.31079694 | 34.18458515 |
| FSCN2      | 0.194399655 | 0.122467696 | NOS3      | 0.1         | 0.14177271  |
| DSC2       | 0.367432694 | 0.404108512 | KANSL1    | 4.489711133 | 3.895270125 |
| DSC3       | 0.219120154 | 0.243528588 | KANSL2    | 7.956896099 | 7.668017984 |
| MAX        | 34.21653219 | 33.24392335 | KANSL3    | 9.434240958 | 8.19841049  |

|           |             |             |           |             |             |
|-----------|-------------|-------------|-----------|-------------|-------------|
| TROAP     | 21.87477605 | 24.79014945 | LIPA      | 72.88443473 | 56.90253966 |
| MAZ       | 85.53140468 | 89.25427836 | TSEN54    | 3.975821105 | 5.553019651 |
| GLIS3     | 3.264613735 | 2.64082916  | LIPE      | 0.467868995 | 0.839353955 |
| KRCC1     | 4.412044593 | 3.284320121 | PREX1     | 0.1         | 0.1         |
| GLIS1     | 1.57588855  | 1.65437202  | SAMD14    | 1.455515582 | 0.426245965 |
| GLIS2     | 5.854010009 | 5.535366692 | SAMD15    | 0.638753983 | 0.557952669 |
| CNTNAP3B  | 0.13257644  | 0.140705309 | LIPJ      | 0.1         | 0.1         |
| DSEL      | 4.561283024 | 4.228679416 | MPRIP     | 12.03479928 | 12.79779783 |
| HACL1     | 6.142430991 | 7.431247534 | LIPH      | 0.1         | 0.1         |
| MBP       | 0.74819552  | 0.464188991 | LIPG      | 0.1         | 0.1         |
| E4F1      | 12.18045105 | 13.13377209 | SAMD12    | 0.211282329 | 0.20454951  |
| KIRREL    | 40.87710206 | 36.9901957  | SAMD13    | 0.1         | 0.265704635 |
| FAM229B   | 2.99806824  | 3.058089628 | SAMD10    | 2.233790924 | 2.587454563 |
| FAM229A   | 0.843222847 | 0.630674766 | SAMD11    | 5.673472941 | 6.708396871 |
| MCC       | 0.63872738  | 0.681265883 | LINS      | 1.008556785 | 1.47529962  |
| CXCL10    | 2.193431391 | 0.862626772 | CSNK2A1   | 31.20481957 | 37.02412945 |
| CXCL11    | 0.358785938 | 0.123097239 | CSNK2A3   | 7.878016044 | 9.137773538 |
| CXCL12    | 0.1         | 0.12090401  | CSNK2A2   | 10.40257391 | 11.32439507 |
| MCU       | 10.69638569 | 13.28878134 | ENTHD2    | 2.670076401 | 2.592570955 |
| ARHGAP11A | 8.316944537 | 11.09649462 | PARPBP    | 5.563230685 | 6.842204822 |
| ARHGAP11B | 2.705226279 | 3.637988318 | RETSAT    | 12.77793168 | 12.02032401 |
| CDCA7L    | 0.363088844 | 0.42560713  | COX3      | 5988.279844 | 8234.721007 |
| FSD1L     | 0.593475447 | 0.749066775 | COX2      | 10422.17935 | 10938.75745 |
| MDK       | 228.7121244 | 215.0632164 | COX1      | 11582.50581 | 13444.08909 |
| ME1       | 3.525034458 | 4.031834039 | UCK2      | 16.64627053 | 22.03230272 |
| ME3       | 0.863659065 | 0.982048915 | UCK1      | 15.75395783 | 17.13596435 |
| ME2       | 9.602871421 | 11.73754273 | NOX5      | 0.1         | 0.124444261 |
| DSG2      | 10.08037976 | 7.836427016 | C7orf55   | 6.19676143  | 6.200610801 |
| DSG3      | 0.109358904 | 0.1         | C7orf50   | 54.03469739 | 56.0142514  |
| MET       | 31.72522313 | 28.62628058 | DIS3L     | 1.768753668 | 1.864189676 |
| MFF       | 26.42928135 | 29.53748717 | NELFB     | 39.7821913  | 42.51398424 |
| CTHRC1    | 9.686005759 | 7.843660961 | NELFA     | 10.49434766 | 13.26338863 |
| MMAA      | 1.19269891  | 0.824032185 | C7orf57   | 0.1         | 0.186912292 |
| MMAB      | 4.636209466 | 4.576579448 | NELFE     | 41.15182585 | 39.96256487 |
| MGA       | 2.12042216  | 1.764793969 | C20orf196 | 2.035792816 | 2.317935413 |
| DHODH     | 2.283366399 | 3.38605098  | C7orf43   | 7.807965916 | 7.566049357 |
| MGP       | 198.8409679 | 188.4920279 | C20orf194 | 1.26550122  | 1.501299374 |
| P4HB      | 392.5356741 | 342.3073523 | C20orf195 | 0.239155206 | 0.298718747 |
| SPON2     | 1199.090277 | 952.172155  | ACRV1     | 0.409496969 | 0.352556025 |
| MIA       | 0.1         | 0.1         | C7orf49   | 21.85527794 | 21.09669783 |
| NSMCE2    | 40.08881188 | 41.09881525 | C7orf31   | 0.157579692 | 0.151391197 |
| NSMCE1    | 16.68764446 | 18.75645931 | RPS27L    | 20.18079802 | 22.89032719 |
| MIF       | 1188.311827 | 1373.9727   | PROCA1    | 0.508208043 | 0.352605637 |
| GNPAT     | 14.36721636 | 14.67468544 | UCP3      | 0.292808863 | 0.222372507 |
| TMEM87A   | 11.80991806 | 10.76308185 | UCP2      | 52.71408185 | 50.06219101 |
| TMEM87B   | 2.631777504 | 2.569623113 | RPS27A    | 131.534785  | 209.7098248 |
| SEPT15    | 59.27928073 | 64.5712736  | EVC2      | 1.300194518 | 1.285972722 |
| DSN1      | 20.0750957  | 20.67131159 | SAMD4A    | 15.15393362 | 11.38079574 |
| TMEM86A   | 0.187020564 | 0.203557136 | SAMD4B    | 21.95089799 | 23.02017048 |
| TMEM86B   | 2.295542259 | 1.837133996 | LYRM9     | 0.288570878 | 0.122440512 |

|              |             |             |          |             |             |
|--------------|-------------|-------------|----------|-------------|-------------|
| COL9A3       | 0.225435679 | 0.279126758 | GATAD2B  | 3.233194158 | 3.220116411 |
| COL9A2       | 0.535832861 | 0.48587891  | GATAD2A  | 20.34744551 | 23.13708998 |
| MKX          | 0.1         | 0.1         | LYRM1    | 8.121427567 | 8.019984817 |
| RCOR3        | 3.943511998 | 3.300346031 | LYRM2    | 5.856661268 | 6.289088299 |
| RCOR2        | 0.499011344 | 0.399146501 | LYRM4    | 3.690063454 | 4.973853876 |
| RCOR1        | 5.7951452   | 5.648658283 | LYRM5    | 5.455329873 | 8.401249523 |
| FKBP11       | 0.784955984 | 1.191004887 | LYRM7    | 1.069957851 | 1.932916307 |
| FKBP10       | 99.84318955 | 88.9978871  | MPLKIP   | 26.7105372  | 34.43477018 |
| FKBP15       | 10.89522614 | 9.690073866 | C7orf26  | 10.42213975 | 11.39847522 |
| DOC2A        | 3.617889004 | 4.36202084  | C7orf25  | 9.186919892 | 8.914741475 |
| FKBP14       | 5.623526452 | 6.740092379 | MYLK2    | 0.318282676 | 0.292966851 |
| BMI1         | 12.79246942 | 14.10494029 | NRROS    | 2.502614838 | 0.97280391  |
| REV3L        | 3.150160783 | 3.02504806  | FOXQ1    | 0.1         | 0.1         |
| MLX          | 19.54624302 | 22.13642503 | SLC25A40 | 3.573413901 | 4.02530859  |
| UTP14A       | 29.16024556 | 41.59909841 | FBRSL1   | 7.788441492 | 9.024620666 |
| UTP14C       | 4.159133958 | 3.414255397 | SLC25A43 | 14.59660829 | 16.47791874 |
| ANKDD1A      | 0.551023948 | 0.314692923 | SLC25A42 | 2.369793036 | 2.072008834 |
| MME          | 3.601827542 | 3.94375522  | SLC25A45 | 0.587410881 | 0.472021725 |
| MMD          | 1.570666015 | 1.793258116 | SLC25A44 | 21.64077338 | 21.51863572 |
| OSMR         | 49.15311041 | 40.93104011 | SLC25A46 | 17.6965881  | 18.21053439 |
| MN1          | 0.134377499 | 0.109818466 | MYLIP    | 1.588187622 | 1.271267617 |
| RABGAP1      | 11.99922227 | 11.06722897 | TICAM2   | 3.396875281 | 2.575371246 |
| MNT          | 7.35300769  | 6.290021947 | TICAM1   | 18.40318686 | 16.18049819 |
| PGRMC1       | 28.47151551 | 32.07173051 | FOXP4    | 7.295806392 | 6.566069982 |
| PGRMC2       | 16.6997352  | 17.51174713 | FOXP2    | 0.61547591  | 0.552313802 |
| MOK          | 28.24961341 | 31.12915799 | FOXP1    | 2.06235396  | 2.230925934 |
| FKBP1A       | 343.9391926 | 370.8826543 | SLC25A51 | 2.569883434 | 2.461353044 |
| FKBP1B       | 1.923765992 | 1.439408207 | SLC25A53 | 0.37540436  | 0.457534132 |
| LOC100130705 | 0.222945436 | 0.207293144 | RNASEH2C | 11.31102961 | 11.24822876 |
| PLVAP        | 0.1         | 0.1         | RNASEH2B | 8.539406972 | 9.138837432 |
| MPG          | 37.78381999 | 38.46037511 | RNASEH2A | 93.72147812 | 103.3919864 |
| MPI          | 11.51842241 | 13.45002323 | C7orf73  | 16.1761958  | 18.49858763 |
| WBP1L        | 14.29985164 | 11.15269092 | FOXO6    | 0.138987825 | 0.141757035 |
| SNIP1        | 6.496606742 | 7.148294333 | FOXO4    | 0.844821175 | 0.764770003 |
| OSR2         | 13.58876053 | 12.81949536 | FOXO3    | 2.78920927  | 2.611347308 |
| OSR1         | 1.087458274 | 0.922573907 | FOXO1    | 1.937941657 | 2.116971043 |
| UTP11L       | 23.44006151 | 32.81524509 | NPAT     | 4.413233336 | 4.916369505 |
| WBP11        | 46.04793195 | 54.63147615 | CLTCL1   | 2.211538026 | 1.614318691 |
| MR1          | 2.208455134 | 1.591317622 | EVI5     | 1.57686428  | 1.551788072 |
| UTP23        | 8.399824916 | 12.25378854 | CPA4     | 8.398926034 | 6.749823897 |
| UTP20        | 3.317404279 | 4.66163553  | C7orf60  | 2.656709217 | 2.668926272 |
| MSC          | 13.4286075  | 10.15760191 | C7orf61  | 0.462210098 | 0.284731903 |
| OST4         | 157.1272684 | 153.4276314 | FOXN3    | 3.636604709 | 3.671891745 |
| ZFHX3        | 0.950546928 | 0.852782506 | FOXN2    | 1.632838031 | 1.640128808 |
| ZFHX2        | 0.306765976 | 0.311988295 | SCGB3A2  | 0.1         | 0.1         |
| SLC52A2      | 185.8737866 | 159.437458  | CELF1    | 12.53053307 | 12.48001169 |
| SLC52A3      | 0.1         | 0.127528138 | CELF2    | 0.1         | 0.1         |
| SLC52A1      | 0.13271491  | 0.13503857  | SCHIP1   | 3.635847368 | 3.513227458 |
| MSN          | 245.8545017 | 239.634     | MCM10    | 6.893628528 | 10.13580628 |



|          |             |             |          |             |             |
|----------|-------------|-------------|----------|-------------|-------------|
| DSTN     | 207.4290366 | 217.0137667 | SQRDL    | 4.120193675 | 2.951972836 |
| ZFHx4    | 0.606188112 | 0.482688059 | FOXM1    | 109.8588279 | 116.8560754 |
| BMP7     | 1.814095718 | 2.28092716  | PVRIG    | 0.18723976  | 0.318017769 |
| ANKHD1   | 11.8350105  | 10.35154428 | FOXL2    | 2.130320732 | 2.376261826 |
| BMP6     | 0.936574508 | 0.613703429 | FOXL1    | 0.1         | 0.1         |
| BMP5     | 0.1         | 0.151235036 | SLC25A16 | 3.477064309 | 3.056302647 |
| BMP4     | 132.9476012 | 109.4341953 | SLC25A15 | 4.609076266 | 6.529901473 |
| BMP2     | 3.118121805 | 2.584720337 | SLC25A18 | 0.24935681  | 0.313287012 |
| BMP1     | 22.32255556 | 18.7431322  | SLC25A17 | 11.74943725 | 12.12589718 |
| OSTC     | 28.60104779 | 34.65038221 | NPC1     | 65.52681683 | 49.4793516  |
| TAB3     | 3.196683823 | 3.021154351 | SLC25A19 | 4.861725167 | 7.184945021 |
| TAB2     | 23.10277247 | 22.04421662 | NPC2     | 258.5243009 | 230.6048855 |
| OSTN     | 0.1         | 0.1         | SLC25A10 | 15.42061409 | 22.54738507 |
| TAB1     | 13.28118628 | 13.46954749 | SLC25A12 | 4.271175565 | 5.787524729 |
| LSM14B   | 28.57907319 | 27.85627469 | SLC25A11 | 75.89212774 | 85.3572479  |
| LSM14A   | 20.98507374 | 23.05790952 | SLC25A14 | 7.440289999 | 8.849431353 |
| PSIP1    | 42.45175171 | 52.14387306 | SLC25A13 | 13.42542933 | 15.00504704 |
| MTR      | 2.668532542 | 3.08636496  | FOXK2    | 20.50731462 | 20.86060802 |
| LRRFIP2  | 25.8783896  | 22.14864028 | FOXK1    | 4.626181311 | 4.568138326 |
| LRRFIP1  | 13.22874054 | 14.20880891 | SLC25A27 | 0.207179174 | 0.307718585 |
| UTP15    | 5.473566824 | 7.096564022 | SLC25A26 | 2.548881743 | 3.02812161  |
| HS3ST3B1 | 0.602592167 | 0.518670047 | SLC25A29 | 12.04607374 | 11.93905953 |
| MMP7     | 0.332132605 | 0.166298778 | SLC25A28 | 13.78868397 | 9.954627266 |
| DYNLT1   | 96.19959535 | 88.70569601 | SLC25A21 | 0.1         | 0.1         |
| MMP1     | 41.9643867  | 29.82948501 | SLC25A20 | 17.67337065 | 18.80392946 |
| DYNLT3   | 0.1         | 0.133478489 | SLC25A23 | 16.45014808 | 19.23674456 |
| MMP2     | 38.93822068 | 34.86920567 | SLC25A22 | 16.90208586 | 17.32453002 |
| MMP3     | 0.611555244 | 0.404383202 | SLC25A25 | 6.613045171 | 6.0819684   |
| MUT      | 5.902072622 | 5.913264848 | SLC25A24 | 28.34352547 | 30.78934362 |
| UTP18    | 21.00722122 | 21.36129037 | FOXJ3    | 14.31088742 | 14.37071901 |
| MMP9     | 0.233436499 | 0.17939676  | FOXJ2    | 6.259855898 | 6.636476564 |
| CDHR3    | 0.723415324 | 0.910364861 | FOXJ1    | 0.1         | 0.1         |
| SPOPL    | 2.700281913 | 2.668256709 | MERTK    | 0.859354021 | 0.662652824 |
| MVD      | 19.25933619 | 17.72630591 | SLC25A38 | 11.81594241 | 14.50804477 |
| MVK      | 12.0540565  | 11.82053972 | SLC25A37 | 37.07486838 | 34.67306592 |
| MVP      | 106.524633  | 83.30506813 | SLC25A39 | 68.86561501 | 78.77552987 |
| TAF9     | 86.91051276 | 103.339509  | SLC25A30 | 5.9194173   | 6.254724916 |
| BMS1     | 9.092063721 | 10.21240067 | SLC25A32 | 26.02735663 | 32.39077043 |
| EPS8L1   | 2.524858126 | 2.317179845 | PVRL4    | 0.1         | 0.121184561 |
| EPS8L2   | 0.925631541 | 0.542137066 | PVRL3    | 7.98069428  | 6.906009934 |
| MX2      | 3.66586881  | 0.600696672 | SLC25A33 | 17.06150521 | 16.67939118 |
| MX1      | 390.3636926 | 106.186934  | PVRL2    | 37.82652257 | 25.94642531 |
| TAF8     | 2.034803514 | 2.082131017 | SLC25A36 | 4.704515787 | 5.778281484 |
| TAF7     | 42.74758424 | 42.75425034 | PVRL1    | 0.858274431 | 0.817383984 |
| TAF6     | 28.38918196 | 28.23623394 | SLC25A35 | 10.91929646 | 10.88860847 |
| TAF5     | 5.059852637 | 5.26457944  | FOXI3    | 0.1         | 0.1         |
| TAF4     | 4.006448658 | 5.237718349 | ZDHHC5   | 37.5709978  | 36.26681202 |
| TAF3     | 2.415596639 | 2.844383428 | ZDHHC6   | 8.627977823 | 9.944897184 |
| TAF2     | 28.69565966 | 30.18155147 | ZDHHC7   | 27.96391031 | 21.728822   |
| TAF1     | 4.395210698 | 4.362982337 | ZDHHC8   | 15.61697159 | 17.18907217 |

|                  |             |             |          |             |             |
|------------------|-------------|-------------|----------|-------------|-------------|
| TPGS1            | 12.971232   | 10.45573221 | ZDHHC1   | 2.142882469 | 1.263231692 |
| LOC10272401<br>1 | 0.913009029 | 0.738553721 | ZDHHC2   | 6.261557566 | 6.07394257  |
| TPGS2            | 35.13601301 | 35.81149052 | ZDHHC3   | 6.361508947 | 6.290158426 |
| MYC              | 59.69246226 | 88.50828532 | ZDHHC4   | 27.13722269 | 24.49782322 |
| MYB              | 0.989866898 | 1.128712602 | CHORDC1  | 9.047590687 | 11.38714658 |
| CDK20            | 22.476343   | 17.84203441 | NPFF     | 1.106807693 | 0.723028631 |
| NKX2-8           | 0.1         | 0.1         | FOXH1    | 3.764909141 | 3.141619673 |
| IAH1             | 14.13262092 | 14.31659999 | SFRP1    | 60.66911809 | 56.28516417 |
| LOC10272402<br>3 | 3.594620433 | 3.998786235 | SFRP2    | 43.5145596  | 28.88059928 |
| NKX2-1           | 0.1         | 0.1         | CTXN1    | 132.0965541 | 137.1692585 |
| FZD1             | 3.205133796 | 3.007841532 | FOXG1    | 9.806430102 | 9.367756427 |
| CDK17            | 5.016246453 | 4.853846036 | EVPL     | 0.1         | 0.122525682 |
| CDK18            | 0.179314927 | 0.137754877 | RBM12    | 18.09923383 | 19.42748855 |
| WNT10B           | 0.911396052 | 1.258703376 | RIMKLB   | 1.746395986 | 1.328991389 |
| WNT10A           | 0.1         | 0.1         | RBM10    | 25.76541385 | 28.76612958 |
| CDK19            | 5.499073906 | 4.994327187 | RBM11    | 0.1         | 0.1         |
| FZD3             | 0.197971509 | 0.191477598 | FOXF2    | 0.123754585 | 0.11696121  |
| FZD2             | 52.78585905 | 41.93413818 | C20orf24 | 75.46115852 | 82.61559414 |
| FZD5             | 0.471985073 | 0.602952588 | C20orf27 | 65.01704559 | 79.30559648 |
| DNAH17           | 0.145428501 | 0.167576634 | PILRB    | 3.243088384 | 3.014910137 |
| FZD4             | 2.418626102 | 1.283963108 | PILRA    | 0.573719851 | 0.494618789 |
| FZD7             | 19.40466823 | 12.69910916 | MYLPF    | 0.1         | 0.156632315 |
| DNAH14           | 0.278131388 | 0.341129304 | CYSTM1   | 101.6048027 | 95.28118463 |
| FZD6             | 6.807806513 | 6.482737948 | SUV39H2  | 5.379474329 | 7.09279681  |
| FZD9             | 2.18514946  | 2.063995135 | FOXE1    | 7.905450456 | 6.959366181 |
| FZD8             | 12.00346271 | 11.76615019 | SUV39H1  | 14.13241597 | 18.67194513 |
| LOC10272404<br>9 | 0.338856446 | 0.526369726 | DIRC2    | 3.416038956 | 3.512618824 |
| FHDC1            | 0.464924528 | 0.382738376 | FOXD4    | 0.14750917  | 0.16784484  |
| LOC10099672<br>4 | 0.439643325 | 0.317249952 | SBSPON   | 7.158151374 | 7.620407571 |
| CDK10            | 4.557404033 | 5.489466296 | FOXD3    | 1.732897971 | 1.26591915  |
| CDK12            | 6.540603749 | 6.928658066 | FOXD2    | 0.366701743 | 0.520532793 |
| CDK13            | 6.520358531 | 6.917881152 | FOXD1    | 31.63204707 | 31.39820271 |
| CDK14            | 0.271024731 | 0.38732894  | FOXC2    | 0.1         | 0.122040503 |
| CDK15            | 1.224605257 | 1.784317999 | FOXC1    | 27.44515361 | 24.19186575 |
| CDK16            | 45.21439897 | 39.91333449 | IBA57    | 1.506575566 | 1.639332807 |
| GCNT1            | 0.300013286 | 0.323533643 | FOXB1    | 1.951587665 | 1.371218855 |
| GRAMD3           | 9.680534451 | 8.984158711 | NPM1     | 544.8175646 | 762.3095954 |
| TANK             | 8.505548957 | 8.787120469 | NPM2     | 0.131504716 | 0.1         |
| GRAMD4           | 4.018663606 | 4.131434708 | NPM3     | 32.73985589 | 48.48737298 |
| GRAMD2           | 0.210467478 | 0.1         | PPP1CA   | 160.6546783 | 159.8541834 |
| GCNT2            | 6.705106704 | 6.157972772 | ZDHHC9   | 24.39021767 | 23.40879379 |
| DTD1             | 9.955010773 | 12.10750941 | ENGASE   | 0.257462195 | 0.373046471 |
| DTD2             | 2.619084672 | 3.047056097 | FOXA1    | 0.176851001 | 0.143898422 |
| SAAL1            | 7.836702254 | 10.73640689 | SAMD9L   | 15.75894371 | 4.837527742 |
| TCAIM            | 5.909969086 | 6.252154053 | CPOX     | 4.127230773 | 5.987962885 |
| TRMT1            | 16.92038303 | 22.63700318 | ACRBP    | 0.265274476 | 0.237677181 |

|                    |             |             |           |             |             |
|--------------------|-------------|-------------|-----------|-------------|-------------|
| TRMT5              | 3.896552084 | 5.047747132 | IFI44L    | 21.14937678 | 5.903462498 |
| TRMT6              | 16.13434475 | 21.43427778 | NPPC      | 0.322330715 | 0.152916072 |
| LAMTOR2            | 76.76818408 | 77.71995125 | NPPA      | 0.829140729 | 0.707389855 |
| LAMTOR1            | 95.45416741 | 92.44213547 | ADPRHL1   | 0.789618721 | 0.90243034  |
| LAMTOR4            | 50.60818595 | 57.98387042 | ADPRHL2   | 34.01733281 | 29.0777608  |
| LAMTOR3            | 5.307265846 | 5.872129596 | RPGRIP1L  | 1.957203528 | 2.140119136 |
| LAMTOR5            | 76.92677077 | 90.91524683 | NPNT      | 1.45877628  | 0.960653508 |
| GUCA1B             | 0.397518326 | 0.753641695 | HOMEZ     | 5.946428123 | 5.593228565 |
| MACROD1            | 7.167357488 | 8.953022953 | C20orf144 | 1.193711094 | 0.750774845 |
| NBN                | 19.76301308 | 18.07313094 | C20orf141 | 8.603716589 | 10.20267524 |
| MACROD2            | 0.311355887 | 0.258457585 | RBM8A     | 21.89209986 | 26.15788533 |
| LZTS2              | 24.68141891 | 19.35815337 | NPR1      | 0.136593996 | 0.1         |
| LZTS3              | 6.178752861 | 6.251733621 | NPR2      | 6.485639401 | 5.3502917   |
| TAP2               | 6.555030885 | 3.790854618 | NPR3      | 0.574186152 | 0.408703128 |
| TAP1               | 26.56400161 | 8.368279588 | VARS2     | 1.941019782 | 1.763691838 |
| NCL                | 219.3202394 | 297.2765606 | BCL9L     | 24.56542695 | 21.91558714 |
| ND1                | 2163.740264 | 2532.591671 | HMGA1     | 182.795324  | 202.1258199 |
| ND3                | 1255.188798 | 1811.496045 | HMGA2     | 12.59842316 | 12.69768059 |
| ND2                | 2872.227843 | 3556.049295 | CPS1      | 0.307444335 | 0.280318863 |
| ND5                | 738.3127371 | 846.7559187 | RBM27     | 7.024211139 | 7.288225075 |
| ND4                | 5639.942693 | 6816.758709 | RBM28     | 12.32491779 | 13.23944298 |
| ND6                | 552.2678581 | 634.3042583 | CD164L2   | 0.1         | 0.148205544 |
| TARS               | 87.53189466 | 91.72395649 | RBM25     | 20.50382479 | 24.082331   |
| KRBA2              | 0.404857338 | 0.420108441 | NAA40     | 9.279005222 | 10.37980405 |
| KRBA1              | 2.94310471  | 2.831311738 | RBM26     | 5.577216079 | 6.685193603 |
| NDP                | 5.414377136 | 3.968603159 | LAMC3     | 0.1         | 0.112166011 |
| WDTC1              | 19.5803813  | 15.16397244 | ATP2A3    | 0.195713714 | 0.160747867 |
| NF1                | 3.323756691 | 2.928888004 | HMGB2     | 64.23107865 | 91.51149137 |
| IARS               | 65.46908344 | 74.31982145 | ATP2A2    | 31.13331242 | 30.42219453 |
| PCNXL2             | 0.580113019 | 0.578845038 | HMGB3     | 18.60144932 | 26.98568992 |
| NF2                | 16.59233345 | 14.5441235  | LAMC2     | 1.421186663 | 1.452357116 |
| LZTR1              | 16.43786393 | 16.49364424 | ATP2A1    | 0.158768413 | 0.16294259  |
| PCNXL3             | 14.09998473 | 10.8821     | LAMC1     | 108.3817654 | 90.23285225 |
| NES                | 0.1         | 0.1         | HMGB1     | 85.10429188 | 121.7814173 |
| PCNXL4             | 11.05608301 | 10.20808229 | SEC61A2   | 4.395022503 | 4.28189769  |
| BNC2               | 3.331077281 | 3.186456828 | SEC61A1   | 164.6552412 | 143.2328799 |
| PGPEP1             | 1.478718248 | 1.089666489 | CPT2      | 11.80330965 | 10.77026758 |
| VSTM2L             | 1.659066806 | 0.949052634 | BCL7A     | 1.526771742 | 2.177433108 |
| NGF                | 9.206711078 | 5.373566758 | BCL7C     | 16.33151733 | 18.23781947 |
| PATL1              | 32.06324329 | 27.51196009 | BCL7B     | 51.02073823 | 47.06285916 |
| FZR1               | 30.56658567 | 30.46283201 | NPTN      | 14.745561   | 12.48646906 |
| UGGT2              | 8.992086345 | 9.52587512  | UQCRRS1   | 100.3099387 | 118.504336  |
| UGGT1              | 5.469027161 | 5.05651882  | RBM34     | 27.49147199 | 32.91022038 |
| ARMCX5-<br>GPRASP2 | 1.06254904  | 1.088550114 | SULT4A1   | 1.301307419 | 1.680076044 |
| MND1               | 3.904749941 | 6.941961935 | RBM33     | 3.783574771 | 3.942691188 |
| NIN                | 3.501842095 | 3.48399126  | RBM17     | 15.63139695 | 17.90085086 |
| METAP1             | 10.51153684 | 11.60754895 | RBM14     | 14.54849919 | 18.43129985 |
| METAP2             | 37.15936786 | 48.50439539 | NAA30     | 5.869784281 | 6.731359316 |
| HABP4              | 25.89044632 | 18.25039125 | RBM15     | 5.838715819 | 6.316597362 |

|                    |             |             |           |             |             |
|--------------------|-------------|-------------|-----------|-------------|-------------|
| UBAP2L             | 108.8627086 | 110.4692776 | RBM18     | 7.04744606  | 6.501154263 |
| COL8A1             | 1.931992621 | 1.588086899 | RBM19     | 8.775897958 | 9.400385463 |
| NLK                | 3.305317113 | 3.178465763 | GORASP2   | 35.10460374 | 33.23854418 |
| NLN                | 8.617586111 | 9.35962213  | GORASP1   | 12.31170947 | 12.45818334 |
| C15orf38-<br>AP3S2 | 3.994684927 | 3.521249022 | NAA35     | 6.366849845 | 7.567007477 |
| PATZ1              | 11.77949747 | 12.02034459 | NAA38     | 64.13410693 | 84.10326709 |
| NMB                | 16.99677455 | 15.83801031 | RBM23     | 12.4169733  | 11.26795045 |
| DTNA               | 2.422869275 | 2.52784291  | RBM24     | 7.504364805 | 8.79170044  |
| DTNB               | 5.531174915 | 5.588803037 | C20orf112 | 0.445410952 | 0.50405302  |
| KTI12              | 7.482227448 | 7.514458923 | RBM22     | 34.15784179 | 38.37130303 |
| NMI                | 19.17338972 | 10.23255114 | LAMA5     | 24.1009355  | 21.16037429 |
| NMU                | 1.882641857 | 1.554673183 | RBM47     | 0.514316739 | 0.388614403 |
| PRPF19             | 54.66992315 | 65.62087874 | RBM48     | 1.874811805 | 1.575439016 |
| RPTOR              | 7.957857967 | 7.615139559 | NAA20     | 37.92300984 | 42.41201564 |
| NNT                | 21.78893628 | 21.50170041 | LAMA4     | 2.966617371 | 2.679895234 |
| NOG                | 1.170877274 | 1.001866619 | GOSR2     | 13.34248237 | 10.92276848 |
| KREMEN1            | 0.235422032 | 0.287344274 | LAMA3     | 5.178427704 | 4.273358502 |
| AMPD2              | 30.91169676 | 27.72427561 | GOSR1     | 7.568430565 | 7.439411583 |
| AMPD3              | 1.45888652  | 1.484915214 | RBM4B     | 5.072479368 | 5.946747145 |
| KREMEN2            | 0.807163712 | 0.677060436 | HMGCR     | 30.99638362 | 32.25583327 |
| PRPF18             | 7.229969978 | 10.02078579 | ATP2C2    | 0.159851702 | 0.164102822 |
| NOV                | 26.50507042 | 21.63486771 | ATP2C1    | 15.78574704 | 14.91254793 |
| NPB                | 2.204995015 | 0.941682863 | HMGCL     | 23.07099374 | 15.50976555 |
| CXCR4              | 0.182244766 | 0.1         | RAB40B    | 2.706874113 | 2.93002087  |
| NPL                | 0.700692003 | 0.970064684 | RAB40C    | 8.908215773 | 7.876268746 |
| NPW                | 1.327195519 | 2.98429048  | NAA25     | 7.331574901 | 9.827736309 |
| PRPF39             | 6.095771506 | 7.368801043 | RBM38     | 13.65157328 | 17.56600053 |
| PRPF31             | 27.52779416 | 30.86811962 | RBM39     | 36.34065619 | 41.91277405 |
| NRM                | 8.09250415  | 7.596332917 | LAMB3     | 0.919648917 | 1.020899253 |
| NRL                | 0.755881456 | 0.363425167 | NAA10     | 146.7996256 | 183.1155819 |
| NSF                | 5.454255385 | 5.389853474 | LAMB2     | 77.07876888 | 55.73486253 |
| SPNS2              | 0.231401252 | 0.219410974 | ATP2B4    | 57.89288357 | 46.90851283 |
| WRNIP1             | 20.57099715 | 22.56351089 | ATP2B2    | 2.878296321 | 2.345528419 |
| TRNT1              | 8.819414677 | 10.69367663 | LAMB1     | 82.7101729  | 74.71980743 |
| SPNS1              | 39.02237561 | 35.80292542 | ATP2B1    | 29.78644399 | 28.40201317 |
| RAI14              | 30.6206453  | 27.2569879  | RBM41     | 1.704788103 | 1.580350454 |
| LTBP4              | 4.623648607 | 3.834650744 | RBM42     | 71.79276223 | 75.12014092 |
| DTX2               | 23.59694152 | 20.49587001 | NAA16     | 1.761197953 | 1.712789834 |
| LTBP2              | 29.44026409 | 23.2740968  | NAA15     | 14.81360437 | 18.04598929 |
| DTX3               | 15.70629286 | 13.18407471 | RBM45     | 5.20388506  | 4.497552082 |
| LTBP3              | 53.44342094 | 46.35331695 | RBM43     | 0.750386452 | 0.403273714 |
| NTS                | 0.477370051 | 0.638898298 | DCAF8     | 19.38767228 | 19.26339783 |
| DTX4               | 0.11792969  | 0.125604256 | DCAF5     | 8.482542555 | 7.578564229 |
| LTBP1              | 18.5016936  | 18.4153574  | DCAF4     | 10.95032548 | 12.87655645 |
| OTX1               | 17.74451634 | 16.32220362 | DCAF7     | 12.12070619 | 12.53837928 |
| TBCD               | 15.94795272 | 16.59652562 | DCAF6     | 24.31616062 | 24.9696027  |
| TBCC               | 16.61993968 | 16.0071288  | SULT2B1   | 0.182923028 | 0.218417131 |
| TBCB               | 64.8717955  | 66.1150415  | PRDX3     | 61.20596904 | 77.60235212 |
| TBCA               | 33.63238556 | 47.55072073 | PRDX2     | 151.4994343 | 172.491385  |

|              |             |             |           |             |             |
|--------------|-------------|-------------|-----------|-------------|-------------|
| TBCK         | 3.357041369 | 2.708429081 | PRDX5     | 232.4743306 | 209.6717919 |
| TBCE         | 13.70687056 | 14.7170971  | PRDX4     | 123.448797  | 150.9766358 |
| DOCK6        | 2.015654068 | 1.74362618  | PRDX1     | 382.898883  | 409.9980452 |
| DOCK5        | 9.698961679 | 7.843799549 | F8A1      | 10.69171158 | 11.21517318 |
| DOCK4        | 2.545717759 | 2.072904861 | F8A2      | 0.286205294 | 0.498862002 |
| DOCK3        | 0.135114077 | 0.166858923 | F8A3      | 0.612064558 | 0.432385002 |
| NVL          | 13.06561784 | 15.02643883 | RAB3IP    | 3.116039302 | 3.430245481 |
| DOCK9        | 4.339182268 | 3.487082395 | PA2G4     | 97.31575592 | 149.5925973 |
| DOCK7        | 11.4928239  | 11.17350213 | PRDX6     | 91.9324369  | 114.2256442 |
| CXCL1        | 226.3408379 | 203.4955286 | FAM102B   | 3.008882362 | 2.95500043  |
| CXCL3        | 6.958106451 | 5.732936365 | FAM102A   | 2.971615887 | 2.738758276 |
| CXCL2        | 8.50705312  | 5.948872675 | CEMP1     | 8.796356408 | 6.687319175 |
| CXCL5        | 31.9640067  | 34.19741079 | FAM101B   | 9.523519871 | 11.49862147 |
| SENP6        | 6.252528667 | 7.133211661 | FAM101A   | 0.1         | 0.1         |
| SENP7        | 2.719305117 | 2.731630761 | JDP2      | 1.473657519 | 0.743158495 |
| SENP5        | 4.184945051 | 4.116378487 | HBEGF     | 4.219969803 | 3.623788475 |
| SENP8        | 0.69486195  | 0.565194014 | ASAH1     | 65.42605187 | 60.20445107 |
| FLOT1        | 44.10139457 | 40.57418178 | TRIM16L   | 10.44436542 | 10.72173768 |
| FLOT2        | 27.1020315  | 26.68039415 | FAM105B   | 4.652974122 | 5.11259819  |
| LOC100996740 | 0.30116661  | 0.243636655 | FAM105A   | 0.232641558 | 0.30520177  |
| SENP2        | 11.58516348 | 11.5599863  | HS1BP3    | 25.45948726 | 21.00116563 |
| SENP3        | 32.53309473 | 39.54415746 | FAM104B   | 5.048788027 | 7.402619505 |
| SENP1        | 8.532729661 | 8.359191534 | FAM104A   | 10.60538288 | 11.00476007 |
| TRNP1        | 0.952971197 | 1.013555657 | RFWD2     | 13.49296097 | 13.93217383 |
| MNS1         | 1.15289291  | 2.025302743 | RFWD3     | 15.94590572 | 17.73887784 |
| DOCK2        | 0.415269353 | 0.465040179 | ALMS1     | 1.462590553 | 1.11596401  |
| DOCK1        | 5.390631942 | 4.97084178  | FAM107B   | 4.170909612 | 3.40132304  |
| GCOM1        | 1.846762634 | 1.900864882 | BEST1     | 0.46476727  | 0.350433204 |
| NXN          | 50.52228767 | 43.04532929 | NUTM2A    | 0.303110987 | 0.156398602 |
| PMF1-BGLAP   | 8.455799793 | 9.808962575 | DISP1     | 2.241776853 | 1.968268321 |
| LTC4S        | 0.177887971 | 0.155613443 | DISP2     | 1.782841444 | 0.932996975 |
| CDIPT        | 48.61693233 | 45.64058177 | FAM109A   | 2.429510577 | 2.993709523 |
| LOC100996760 | 0.126478734 | 0.1         | CYP4F22   | 0.1         | 0.1         |
| LOC100996761 | 0.578212591 | 1.372686873 | GLB1L2    | 0.194313967 | 0.391814923 |
| SLC4A1AP     | 9.143370436 | 9.954308792 | KIAA0226L | 0.282789112 | 0.249159753 |
| C14orf79     | 5.449547629 | 5.232278476 | DHCR24    | 74.64511279 | 69.00894799 |
| SYNGAP1      | 6.600392726 | 5.099380133 | BET1L     | 27.97372303 | 24.18109096 |
| TBK1         | 11.72327621 | 12.31994525 | SMDT1     | 6.250819553 | 7.419663599 |
| MNX1         | 6.235789606 | 6.390325054 | ACSS3     | 0.431068551 | 0.430944638 |
| PHKA1        | 0.471020319 | 0.629830648 | ACSS2     | 9.520862316 | 7.984338211 |
| PHKA2        | 1.807318962 | 1.904204514 | SAA2-SAA4 | 0.1         | 0.1         |
| C14orf80     | 17.11328369 | 17.90953826 | SCGB2B2   | 0.1         | 0.1         |
| C14orf93     | 3.065722504 | 2.641096423 | ACSS1     | 0.777257277 | 0.744765517 |
| SDR42E1      | 0.187166572 | 0.162238534 | RPH3AL    | 0.21318361  | 0.248161158 |
| IL31RA       | 3.776446188 | 4.160241073 | KCNIP1    | 0.481994684 | 0.372751222 |
| NR2F1        | 8.885758313 | 6.651486055 | KCNJ11    | 0.115226048 | 0.1         |
| NR2F2        | 49.94679276 | 47.48761581 | KCNJ12    | 1.719131577 | 2.18521699  |

|          |             |             |          |             |             |
|----------|-------------|-------------|----------|-------------|-------------|
| AIF1L    | 0.144339639 | 0.142212422 | KCNIP3   | 2.132410973 | 1.65301588  |
| NR2F6    | 37.36438603 | 41.61503409 | KCNJ14   | 0.263999121 | 0.451295155 |
| TBL3     | 21.34915377 | 22.26497979 | KCNIP4   | 0.402796785 | 0.455189768 |
| TBL2     | 19.84876444 | 17.09348947 | ACSM3    | 0.45004824  | 0.54107213  |
| RAB3IL1  | 18.61279632 | 15.37926369 | GORAB    | 5.441723879 | 6.294309929 |
| OAF      | 8.948741091 | 10.19837581 | ACSM4    | 0.1         | 0.1         |
| L2HGDH   | 1.642769669 | 2.205755783 | PWP2     | 0.609951185 | 0.566521722 |
| ERGIC3   | 220.9880063 | 217.3697098 | PWP1     | 49.27568258 | 59.41463269 |
| ERGIC2   | 16.99805182 | 19.78474885 | ACSL1    | 11.12572179 | 12.45568352 |
| ERGIC1   | 61.8710148  | 62.15200723 | ACSL5    | 0.699260515 | 0.440112142 |
| OAT      | 39.56012386 | 39.32193861 | ACSL4    | 23.40260652 | 22.64157202 |
| NEURL1B  | 4.80370764  | 5.082884719 | ACSL3    | 19.76786478 | 18.38765358 |
| IL12RB1  | 0.703005893 | 0.265598956 | RABGAP1L | 2.245162302 | 2.187883863 |
| DAB2IP   | 22.86294229 | 20.27239899 | RAB39A   | 1.324440871 | 1.015905338 |
| COL3A1   | 46.4776336  | 34.92392212 | RAB39B   | 2.925368423 | 2.846151254 |
| CDKN3    | 56.6194065  | 64.66303578 | PARP16   | 0.824192416 | 0.984490389 |
| EXOC3L1  | 0.49530407  | 0.263410424 | PARP14   | 29.64364133 | 10.77731087 |
| PSKH1    | 8.920225422 | 8.688881912 | PARP12   | 31.06882237 | 14.40486095 |
| CDKL3    | 0.664687793 | 1.226172211 | PARP10   | 38.08143388 | 11.35056149 |
| CDKL5    | 0.771629062 | 0.60884132  | PARP11   | 0.1         | 0.1         |
| POLRMT   | 18.53560761 | 22.80916785 | NCEH1    | 25.11848286 | 21.11859474 |
| TC2N     | 0.1         | 0.1         | MYL6B    | 69.33581838 | 64.7358873  |
| CDKL1    | 0.558124136 | 0.885061718 | RAB33A   | 1.084636116 | 0.635655829 |
| INO80C   | 2.429990721 | 3.234113577 | RAB33B   | 1.630743235 | 2.027094185 |
| KHDRBS1  | 77.19744129 | 85.84674984 | ALOX12B  | 0.1         | 0.1         |
| INO80B   | 8.792878225 | 8.42486045  | AAMDC    | 14.79329046 | 13.5887877  |
| INO80E   | 10.05963089 | 11.86457265 | NQO1     | 215.6647158 | 176.8091058 |
| TXNDC9   | 11.74659347 | 13.55572695 | NQO2     | 18.28637833 | 15.70699066 |
| INO80D   | 0.489561075 | 0.375529672 | CDK5R1   | 0.962709322 | 1.26460667  |
| KHDRBS3  | 1.214948203 | 1.29414025  | SMEK1    | 15.28558315 | 15.17609421 |
| AGAP11   | 0.330528646 | 0.276358952 | SMEK2    | 5.712849679 | 6.50831646  |
| TXNDC2   | 0.190161883 | 0.138626345 | HDLBP    | 121.9825535 | 105.842234  |
| TXNDC5   | 71.89277366 | 82.51999968 | CHCHD4   | 18.49671155 | 27.6662382  |
| BOD1     | 57.23565984 | 55.28092869 | CHCHD5   | 27.72063474 | 28.78105632 |
| TMPRSS13 | 0.1         | 0.110758169 | CHCHD2   | 436.8094461 | 520.374127  |
| MOB4     | 3.847080215 | 4.225929712 | CHCHD3   | 61.0083937  | 68.54396931 |
| IBTK     | 6.379824689 | 6.258321417 | CHCHD6   | 5.447925571 | 7.191531769 |
| MOB2     | 8.943426152 | 8.064465098 | CHCHD7   | 29.49506434 | 32.41818519 |
| CNTROB   | 25.31699686 | 27.69454988 | CHCHD1   | 32.23100306 | 38.73243136 |
| SP140L   | 8.706620848 | 4.354428354 | PREPL    | 6.816277972 | 8.517770734 |
| OGT      | 25.9471898  | 23.43695827 | AKNA     | 1.703477887 | 1.29010659  |
| C14orf28 | 0.582685643 | 0.814822197 | CPLX1    | 1.265262287 | 1.313360576 |
| SMIM10   | 4.293983297 | 5.195617879 | KLRC2    | 0.270192554 | 0.616462592 |
| SMIM12   | 8.146354827 | 8.153216912 | ACSF3    | 4.401959056 | 4.322338053 |
| SMIM11   | 0.330894564 | 0.553373142 | ACSF2    | 2.316886388 | 1.89075285  |
| SMIM14   | 10.6221752  | 6.536533067 | RFXAP    | 2.61940706  | 3.40893093  |
| SMIM13   | 3.63131416  | 4.281294248 | TSEN15   | 12.63133836 | 15.24484974 |
| SMIM15   | 20.6288437  | 23.65287022 | CTDSPL2  | 4.884845818 | 4.840444211 |
| SMIM19   | 39.00156887 | 35.88109835 | EGFL7    | 0.564505535 | 0.536401955 |
| C14orf37 | 0.791110433 | 0.653644271 | EGFL8    | 0.267871452 | 0.297421907 |

|           |             |             |                   |             |             |
|-----------|-------------|-------------|-------------------|-------------|-------------|
| MMS22L    | 1.516228018 | 1.644635768 | TSEN34            | 64.57716386 | 69.47130663 |
| SMIM20    | 11.954961   | 12.58455637 | CD163L1           | 0.155598541 | 0.1         |
| GTPBP10   | 1.477652532 | 1.890277975 | PRELP             | 0.108926336 | 0.1         |
| PHKG1     | 20.13422481 | 18.38540983 | KLRG2             | 0.1         | 0.115651547 |
| PHKG2     | 4.540844184 | 4.334524596 | TBKBP1            | 3.794648145 | 3.563557848 |
| TBX1      | 0.449159626 | 0.244335277 | AKT2              | 34.37804068 | 32.35792677 |
| TBX6      | 0.198672891 | 0.346589899 | AKT3              | 6.780285194 | 7.275644132 |
| TBX3      | 22.83343565 | 20.13224571 | AKT1              | 64.30475649 | 60.91010848 |
| TBX2      | 1.083692818 | 1.1206383   | PKNOX1            | 2.84704996  | 2.553537897 |
| SUCLA2    | 13.71200279 | 15.71588973 | TSTD3             | 0.854479126 | 0.638711957 |
| SMARCB1   | 63.76548153 | 71.10821006 | TSTD1             | 6.893034731 | 8.367644764 |
| HERC5     | 26.81358276 | 10.81726335 | TSTD2             | 4.74604916  | 5.050915133 |
| HERC4     | 27.20185498 | 26.6430808  | SKAP2             | 0.898042784 | 0.781912398 |
| HERC3     | 5.17189491  | 4.521339548 | TSTA3             | 26.24872065 | 31.12905136 |
| C1GALT1C1 | 30.68686003 | 29.22593405 | EXD2              | 5.766338863 | 5.922962272 |
| HERC2     | 3.07686913  | 2.588259256 | EXD3              | 1.081594912 | 1.020554603 |
| HERC1     | 2.02437456  | 1.676605786 | CRABP2            | 0.782571522 | 0.803976876 |
| PTGFRN    | 0.1         | 0.1         | RNF219            | 7.023896846 | 8.255678302 |
| HERC6     | 24.5868387  | 8.911962553 | MEF2BNB-<br>MEF2B | 3.019652497 | 2.614858724 |
| SMARCC1   | 22.64199929 | 27.07171784 | SULT1A1           | 0.1         | 0.120460103 |
| SMARCC2   | 19.33536007 | 19.87514693 | RNF214            | 7.975887541 | 8.403284884 |
| TALDO1    | 66.42878243 | 70.14023171 | RNF213            | 4.8580483   | 2.541008181 |
| MOGS      | 34.17788428 | 29.83939886 | RNF216            | 15.19695228 | 12.75640268 |
| OMP       | 0.416776079 | 0.55236788  | RNF215            | 6.722301175 | 7.163717388 |
| RANBP17   | 1.738410838 | 1.724799219 | RNF217            | 0.600611188 | 0.594410716 |
| SMARCA5   | 13.14353283 | 12.12775764 | SULT1A3           | 0.248326273 | 0.152953842 |
| SMARCA1   | 23.96369514 | 22.43054356 | TIPARP            | 44.63687143 | 41.4437891  |
| SMARCA2   | 2.803586863 | 2.585561475 | RNF223            | 0.1         | 0.1         |
| SMARCA4   | 39.33455073 | 43.27947789 | RNF224            | 0.1         | 0.198720336 |
| ECHDC1    | 15.13419048 | 16.78387594 | RNF220            | 31.53651819 | 30.74954654 |
| RANBP10   | 4.929959396 | 4.494285477 | ARHGAP8           | 0.1         | 0.121503864 |
| ECHDC2    | 8.702503793 | 5.882208212 | ARHGAP1           | 35.39249547 | 31.66125805 |
| GNRH1     | 1.066535386 | 1.135186033 | ARHGAP5           | 2.161046103 | 2.343939615 |
| ECHDC3    | 1.733292867 | 2.05114417  | ARHGAP6           | 0.766042013 | 0.869298318 |
| NOL10     | 7.421892381 | 11.23461249 | ARHGAP4           | 0.300286655 | 0.177004497 |
| NOL11     | 16.10454988 | 24.04342267 | DLGAP3            | 0.398414646 | 0.293703218 |
| NOL12     | 10.41708458 | 13.47479794 | DLGAP5            | 28.93935998 | 37.7474514  |
| PAK1IP1   | 23.88169352 | 31.9804149  | DLGAP4            | 29.58871548 | 26.77581281 |
| ICA1      | 0.395898242 | 0.356550376 | METRNL            | 8.473099586 | 9.30560351  |
| NUDCD3    | 24.0628831  | 21.45724719 | SLC39A11          | 3.652074512 | 3.585777151 |
| NUDCD2    | 21.80116633 | 25.61202146 | SLC39A10          | 4.110874293 | 4.443261316 |
| NUDCD1    | 23.5851839  | 21.8704188  | SLC39A13          | 29.81739081 | 23.0905086  |
| KIF7      | 1.63896181  | 1.134208946 | WNT9A             | 0.518961911 | 0.1         |
| DUS2      | 6.959803024 | 9.640779085 | SLC39A14          | 138.1261609 | 110.7369203 |
| KIF9      | 1.239092668 | 1.428100871 | PXDN              | 55.18160608 | 48.44586385 |
| DEPDC7    | 1.949819792 | 3.095065574 | PPARG             | 33.58813425 | 33.77276575 |
| DEPDC1    | 10.58961054 | 13.40833362 | PPARA             | 0.95301629  | 0.642625378 |
| DEPDC5    | 2.289983573 | 2.184918005 | PPARD             | 8.560822775 | 6.923092549 |
| EEF1E1    | 10.30980306 | 20.10508048 | CENPA             | 20.39403482 | 24.41469453 |

|         |             |             |             |             |             |
|---------|-------------|-------------|-------------|-------------|-------------|
| DEPDC4  | 0.411218604 | 0.703157174 | CENPB       | 103.6549926 | 104.6559156 |
| HSD17B4 | 38.60251216 | 42.93769573 | CENPC       | 3.155957469 | 3.456086101 |
| HSD17B6 | 1.150079003 | 1.264125428 | NRAS        | 40.45730093 | 43.84013488 |
| HSD17B7 | 4.033111818 | 3.836278752 | EXOSC10     | 37.25310523 | 45.04165052 |
| HSD17B8 | 0.319291822 | 0.398244552 | PRR14L      | 1.833229609 | 1.968179332 |
| ARNTL2  | 5.80615834  | 5.390586108 | CENPT       | 12.2102121  | 12.40269778 |
| OS9     | 84.03247581 | 72.54974604 | CENPU       | 8.330712117 | 9.482642032 |
| HSD17B1 | 8.226847003 | 8.064188972 | CENPV       | 8.892441206 | 14.85481008 |
| HSD17B2 | 0.1         | 0.1         | CENPW       | 6.155850237 | 8.569991655 |
| PGGT1B  | 3.329536625 | 3.178499749 | CRBN        | 11.84969059 | 14.04431411 |
| TCEB3   | 17.50467624 | 18.70336596 | WNT7B       | 0.591108137 | 0.355887196 |
| CHRNA10 | 0.340391513 | 0.424216362 | WNT7A       | 0.1         | 0.1         |
| TCEB2   | 78.02691546 | 95.38329756 | CENPE       | 5.619672368 | 7.448194089 |
| TCEB1   | 48.19270338 | 56.82834899 | CENPF       | 14.48549832 | 17.58066184 |
| MON2    | 4.273192374 | 3.693419751 | ERCC6-PGBD3 | 7.523678298 | 5.61762806  |
| BOP1    | 70.79139206 | 96.01647857 | CENPH       | 22.16713709 | 29.68987482 |
| TCEA3   | 0.514504869 | 0.534080668 | ETNK2       | 10.96796829 | 9.764380459 |
| TCEA2   | 8.725307982 | 8.430167836 | CENPI       | 11.78154915 | 12.93206261 |
| TCAP    | 0.369736641 | 0.177038767 | ETNK1       | 1.621738574 | 1.907432967 |
| TCEA1   | 44.23312717 | 46.78728281 | CENPJ       | 6.147080978 | 6.913358886 |
| LOXL3   | 1.345934694 | 1.469415458 | CENPK       | 10.39421606 | 12.67901533 |
| NR3C1   | 26.43215288 | 21.58977154 | CENPL       | 7.269043083 | 8.562019958 |
| LOXL1   | 42.61159132 | 35.1359977  | CENPM       | 9.837888306 | 11.42205072 |
| LOXL2   | 773.6831487 | 612.2413659 | CENPN       | 6.800864537 | 8.279247666 |
| EEF1B2  | 115.6096861 | 148.2761557 | CENPO       | 8.891754565 | 9.362566938 |
| MORC3   | 5.722173654 | 5.583411164 | CENPP       | 2.261465377 | 3.371416355 |
| MORC4   | 5.6284614   | 5.469656293 | CRAT        | 34.19031339 | 28.91521429 |
| BORA    | 6.983458584 | 7.741349327 | CENPQ       | 4.194538878 | 5.843479056 |
| EEF1A1  | 1241.339081 | 1415.223428 | CRB3        | 0.1         | 0.1         |
| EEF1A2  | 0.643585858 | 1.171978893 | CRCP        | 8.998321287 | 9.941050582 |
| ODF3B   | 1.983095327 | 1.207288543 | NRD1        | 83.05945347 | 76.19555848 |
| TCF7    | 25.63823483 | 21.06340913 | APOA1BP     | 97.56078098 | 108.7352788 |
| ODF2L   | 9.051787543 | 11.10941271 | UPK3BL      | 1.454914079 | 1.205638336 |
| SHARPIN | 63.58011212 | 58.21283192 | BOD1L1      | 3.066570357 | 2.867808766 |
| VILL    | 0.563691453 | 0.532956282 | CREM        | 6.62740805  | 7.179874016 |
| MORC2   | 9.903224371 | 10.10843902 | NREP        | 12.6594016  | 14.44500958 |
| QSER1   | 2.414248745 | 2.865914752 | NRF1        | 4.367951933 | 5.207015513 |
| AMOTL2  | 47.48686766 | 38.20892272 | SLC9A3R2    | 0.694375819 | 0.726488233 |
| TCF4    | 3.130283319 | 3.01161602  | SLC9A3R1    | 11.49011132 | 11.87592577 |
| TCF3    | 34.80466119 | 39.28610462 | HNRNPDL     | 42.18726538 | 47.68014955 |
| AMOTL1  | 8.984655547 | 8.846951953 | G3BP1       | 30.97975892 | 34.1320783  |
| GALK2   | 4.379223681 | 4.023833763 | G3BP2       | 27.51808326 | 27.91647168 |
| GALK1   | 16.5518739  | 15.49912115 | YRDC        | 10.51289212 | 12.84859415 |
| TCHH    | 0.107426916 | 0.105302954 | TBXAS1      | 0.779818314 | 0.882907686 |
| TCHP    | 2.963326637 | 3.366448589 | SNAP25      | 0.542766565 | 0.837668077 |
| RB1CC1  | 15.35001864 | 16.21476716 | RMND1       | 7.362285349 | 7.13733557  |
| CHI3L2  | 31.16686363 | 28.29156629 | SNAP23      | 8.580281977 | 9.441729349 |
| CHI3L1  | 0.184841498 | 0.241349572 | NRGN        | 1.976729218 | 2.719128318 |
| VIMP    | 22.39102075 | 19.86435812 | ALAD        | 13.09563852 | 12.46099999 |



|                    |             |             |         |             |             |
|--------------------|-------------|-------------|---------|-------------|-------------|
| SGK494             | 0.285256719 | 0.355105065 | EXO1    | 13.3204145  | 18.28278452 |
| GALNS              | 10.83626771 | 8.598834648 | PPP6R1  | 78.26870128 | 73.37380951 |
| DHRS4L1            | 1.586393828 | 2.429710367 | PPP6R2  | 13.12419969 | 11.35639963 |
| DHRS4L2            | 4.684906349 | 4.292229574 | PPP6R3  | 14.06096272 | 16.34530569 |
| ATG10              | 2.817451411 | 2.395399685 | EXO5    | 5.39589021  | 4.96892303  |
| FNDC3B             | 15.25955295 | 13.09749971 | SNAP29  | 18.25003553 | 18.15968907 |
| TRIM39-<br>RPP21   | 2.61965351  | 2.68025789  | ACTR3   | 40.82644828 | 41.63739934 |
| FNDC3A             | 10.15535065 | 7.953718229 | ACTR2   | 52.28897982 | 57.57992806 |
| ATG14              | 3.24358349  | 2.915496484 | ACTR6   | 4.631247282 | 5.713032042 |
| ATG13              | 13.84515187 | 12.03378    | ACTR5   | 4.584700796 | 5.382065615 |
| ATG12              | 10.49480953 | 12.17206591 | NRG1    | 45.66223794 | 38.21943971 |
| PRKRIP1            | 4.006469245 | 3.756692218 | NRG2    | 0.36337783  | 0.466710388 |
| RNPC3              | 3.458800101 | 3.815313941 | ACTR8   | 8.088099353 | 8.461264241 |
| FLRT2              | 4.967204627 | 3.731983467 | IMPACT  | 3.416921116 | 3.672250108 |
| FLRT3              | 0.1         | 0.108177726 | LRTOMT  | 1.537816021 | 1.484978006 |
| FLRT1              | 1.479348411 | 1.228135394 | IMPAD1  | 27.43370091 | 27.86675344 |
| STARD13            | 7.584717909 | 6.949893353 | SNAP47  | 24.28686406 | 22.74515003 |
| ICMT               | 43.48444127 | 45.57598399 | BAHD1   | 10.94078137 | 10.16808513 |
| STARD10            | 7.913597493 | 6.537367872 | IGF2BP1 | 0.1         | 0.1         |
| NR1D2              | 5.306984208 | 4.459869664 | IGF2BP3 | 2.423380023 | 3.141382704 |
| NR1D1              | 7.962895975 | 6.810368079 | IGF2BP2 | 22.24757517 | 19.36956548 |
| GNPTG              | 16.91635713 | 13.80547505 | WHAMM   | 3.510397788 | 3.064453342 |
| TCN2               | 6.14259544  | 3.77003092  | HNRNPA1 | 133.769961  | 172.409628  |
| TCN1               | 0.1         | 0.1         | HNRNPA0 | 64.90339605 | 77.85147268 |
| ATG2A              | 3.735692693 | 3.085926133 | HNRNPA3 | 29.09002904 | 33.18968233 |
| FARSA              | 68.78895229 | 87.52052007 | MYO10   | 25.7983832  | 20.32167537 |
| PAM                | 59.37973549 | 52.21806787 | EXOG    | 2.048585723 | 2.257734396 |
| FARSB              | 23.86198795 | 32.4600404  | HNRNPAB | 173.2327799 | 214.5353285 |
| ATG2B              | 2.248449061 | 2.142034015 | MYO19   | 15.35131785 | 16.73801046 |
| VSIG10             | 1.387619098 | 1.330787844 | MYO1D   | 0.1         | 0.107158272 |
| FARS2              | 7.233206424 | 9.171733904 | MYO1E   | 28.20045588 | 25.36903962 |
| AIFM1              | 54.21678953 | 60.37239061 | PINK1   | 7.834099881 | 6.486890266 |
| AIFM2              | 7.389163785 | 5.761140438 | MYO1B   | 13.94687618 | 24.62801685 |
| PBK                | 59.48691086 | 84.01306651 | MYO1C   | 130.9538525 | 110.6858593 |
| HADHB              | 25.19491451 | 25.72780569 | MYO1F   | 0.423683969 | 0.393339919 |
| HADHA              | 55.2159086  | 64.45599657 | CPNE8   | 0.1         | 0.11071776  |
| ZNF664-<br>FAM101A | 0.401416443 | 0.299844244 | CPNE7   | 12.61366852 | 11.29665836 |
| HEATR5A            | 3.358960636 | 3.032345152 | CRKL    | 19.09514296 | 19.0267323  |
| HEATR5B            | 3.542001566 | 3.649942287 | CCDC91  | 6.395296049 | 6.648563599 |
| TCP1               | 147.2070403 | 180.7620478 | OPHN1   | 0.382831278 | 0.361053088 |
| NR1I3              | 2.808515068 | 2.569837698 | CCDC96  | 1.01692918  | 0.66855898  |
| PDF                | 9.521216032 | 10.25444791 | CPNE1   | 58.38622417 | 59.84413981 |
| ICT1               | 23.97749249 | 29.09168619 | CCDC97  | 18.10208162 | 16.19993341 |
| FARP2              | 1.256271466 | 1.29711865  | CPNE3   | 19.11854559 | 22.2268798  |
| FARP1              | 14.98468351 | 13.00746724 | CPNE2   | 19.59913881 | 17.17193528 |
| NR1H2              | 48.27300229 | 43.69008236 | CCDC92  | 22.00716499 | 17.3621948  |
| NR1H3              | 0.880210788 | 0.599455371 | CCDC93  | 4.199841559 | 3.887408384 |
| DHRS1              | 6.593909622 | 4.561325391 | SCAPER  | 1.912005968 | 1.698230385 |

|         |             |             |              |             |             |
|---------|-------------|-------------|--------------|-------------|-------------|
| DHRS2   | 0.264454818 | 0.287878018 | CCDC94       | 16.09072949 | 16.82822097 |
| DHRS3   | 79.10869067 | 65.98727961 | ALG8         | 28.15018329 | 34.75321148 |
| DHRS4   | 7.378777836 | 7.181873142 | ALG9         | 3.999373237 | 3.841121033 |
| DHRS7   | 11.90271097 | 12.81010536 | ALG6         | 4.368912406 | 5.172800536 |
| MPC1    | 3.561721543 | 4.371008844 | CCDC78       | 0.339284285 | 0.308820792 |
| MPC2    | 24.12094997 | 26.40088036 | KCNK12       | 0.1         | 0.152061988 |
| MB21D2  | 8.599154873 | 6.664169549 | ACTN1        | 181.6622444 | 149.5823468 |
| MB21D1  | 4.626276629 | 4.731624522 | KCNK13       | 0.1         | 0.1         |
| PGD     | 181.4869314 | 188.1944245 | ALG5         | 34.976681   | 39.63859228 |
| PGF     | 109.3308901 | 127.8040917 | ALG2         | 10.49373156 | 8.83679926  |
| PGP     | 12.4583076  | 14.72002213 | MYO7B        | 0.252126726 | 0.154310639 |
| STAMBP  | 4.405397227 | 4.009014083 | ALG3         | 84.65830511 | 91.81913691 |
| TCTA    | 43.48548655 | 35.60466301 | ACTN4        | 402.272957  | 352.9490033 |
| PHB     | 73.06587442 | 92.92088587 | MYO7A        | 0.113918627 | 0.109938156 |
| DVL1    | 39.77251311 | 44.45494171 | ALG1         | 9.066679478 | 8.388198289 |
| DVL2    | 30.08911579 | 27.08428401 | CCDC80       | 21.05912087 | 13.57733712 |
| DVL3    | 17.94734703 | 16.68318808 | C8orf44-SGK3 | 1.147450686 | 1.026744454 |
| PI3     | 0.287549736 | 0.1         | CCDC86       | 38.92810081 | 52.87864736 |
| MPDZ    | 3.3535948   | 3.565725393 | CCDC87       | 0.402974857 | 0.290879071 |
| PIR     | 5.318394424 | 4.751603692 | CCDC82       | 5.854845553 | 5.297311093 |
| RSL24D1 | 16.81751886 | 24.80426138 | CCDC84       | 1.479237442 | 2.574627832 |
| TCIRG1  | 20.81854878 | 14.83120912 | SLC45A4      | 3.41408028  | 3.171826401 |
| ADAMTS4 | 9.394145812 | 6.684813894 | SLC45A3      | 1.529596989 | 2.121696473 |
| ADAMTS2 | 8.238059082 | 7.091541833 | NRN1         | 2.095211901 | 2.624639409 |
| ADAMTS3 | 1.099406221 | 1.316933311 | SLC45A1      | 5.214051275 | 3.796057374 |
| ADAMTS1 | 1.607938592 | 1.240500057 | EPB41        | 1.871066261 | 1.615210105 |
| RNPEP   | 41.09263629 | 35.44168588 | EPAS1        | 103.4393965 | 78.01498203 |
| NPIPA1  | 6.265302147 | 5.105477845 | CEND1        | 9.410830321 | 12.02151513 |
| NPIPA7  | 0.454750753 | 0.634741394 | MYO5A        | 3.750400566 | 3.789693748 |
| ADAMTS9 | 0.1         | 0.1         | EXT1         | 65.33646823 | 58.3388336  |
| ADAMTS6 | 4.567466718 | 4.055418105 | EXT2         | 25.4375906  | 21.0464601  |
| ADAMTS7 | 0.128388676 | 0.133783394 | MYO5B        | 0.105457067 | 0.1         |
| HMGCS1  | 13.22603824 | 12.59630993 | MYO5C        | 0.219171388 | 0.19572688  |
| TRPC3   | 0.495345118 | 0.340463873 | NRP1         | 53.45608191 | 45.21861845 |
| TRPC4   | 2.990363715 | 2.335753858 | CSRNP1       | 8.818297736 | 5.731611176 |
| TRPC1   | 2.204954641 | 2.723538485 | NRP2         | 23.14353399 | 17.57802276 |
| BPGM    | 21.11732573 | 18.75276447 | CSRNP2       | 12.90762538 | 10.97884404 |
| PKM     | 1780.740086 | 1543.520549 | ZBED6CL      | 0.1         | 0.1         |
| POLR1A  | 9.148617777 | 9.981344854 | PYROXD1      | 2.039044269 | 2.221721575 |
| POLR1B  | 7.622741234 | 8.288483267 | OTUD7B       | 8.464972602 | 7.319741764 |
| NOS1AP  | 0.950434647 | 0.867373468 | CROT         | 1.586557624 | 1.239640045 |
| POLR1C  | 22.80172783 | 30.89515682 | THTPA        | 10.32570384 | 8.8280391   |
| POLR1D  | 22.13226161 | 30.21963632 | OTUD6B       | 10.08830543 | 13.41419461 |
| POLR1E  | 41.00964471 | 62.39626786 | SREBF1       | 57.47390577 | 55.52985479 |
| NUFIP1  | 4.480176493 | 5.440198285 | SREBF2       | 38.04436511 | 36.49536491 |
| NUFIP2  | 5.552974109 | 5.926647977 | PDIK1L       | 1.042640544 | 1.505018315 |
| BPHL    | 8.326557959 | 7.019952909 | UFC1         | 73.25776972 | 77.32992173 |
| POLR2A  | 33.59084547 | 31.5364803  | CAB39        | 13.43297769 | 13.91994751 |
| POLR2B  | 37.28924123 | 44.21117893 | C1orf35      | 10.75164547 | 14.47107318 |
| POLR2C  | 31.66241661 | 30.49089668 | RIBC1        | 0.571569836 | 0.156118254 |

|         |             |             |                    |             |             |
|---------|-------------|-------------|--------------------|-------------|-------------|
| POLR2D  | 7.786554529 | 9.257871563 | BCL2L2-<br>PABPN1  | 22.44148813 | 23.69746252 |
| POLR2E  | 81.30785794 | 96.35586666 | RIBC2              | 2.651343851 | 3.188980386 |
| POLR2F  | 22.83795186 | 30.18827466 | C1orf21            | 2.186518109 | 1.996451841 |
| POLR2G  | 61.92015755 | 66.88722631 | C1orf27            | 3.553639819 | 3.803703964 |
| POLR2H  | 29.26902459 | 35.14105639 | MYO9B              | 30.96545106 | 24.43529123 |
| POLR2I  | 38.05064614 | 46.0423159  | SRCRB4D            | 1.210861233 | 0.827077384 |
| POLR2J  | 55.24173411 | 68.40338275 | MYO9A              | 1.287810051 | 1.106590111 |
| POLR2K  | 58.41811731 | 79.13998951 | C1orf50            | 10.23433777 | 11.42925272 |
| POLR2L  | 167.1624968 | 170.6230676 | OTUD4              | 7.776603056 | 6.711980021 |
| POLR2M  | 3.549748134 | 3.872288086 | C1orf51            | 8.27144081  | 7.425139589 |
| NPIPA8  | 1.321919261 | 1.338348491 | OTUD5              | 31.98054827 | 28.93209013 |
| PML     | 30.63065224 | 18.15028622 | C1orf52            | 6.320058523 | 7.779181555 |
| POLR3A  | 11.61775862 | 12.53367379 | CRTC2              | 26.40542628 | 24.72786686 |
| POLR3B  | 3.698777904 | 5.473575676 | C1orf53            | 3.294661249 | 3.738812787 |
| POLR3C  | 30.24180656 | 28.03042975 | CRTC3              | 5.383180709 | 4.486874347 |
| POLR3D  | 58.86500071 | 57.11617559 | C1orf54            | 0.1         | 0.275801735 |
| POLR3E  | 6.616536485 | 8.570712833 | UBXN2B             | 8.167414163 | 8.787998273 |
| POLR3F  | 6.944155853 | 7.873048084 | UBXN2A             | 5.443090195 | 6.478005365 |
| POLR3G  | 3.263846524 | 6.637041935 | CRTC1              | 2.968019581 | 2.275144184 |
| NPIPB3  | 0.443858425 | 0.355751284 | C1orf56            | 4.306825606 | 3.822351429 |
| POLR3H  | 30.27272739 | 30.6301439  | BUB1B              | 21.1193034  | 27.35063143 |
| POLR3K  | 11.00724626 | 16.57629226 | PEBP1              | 67.06871519 | 85.93157163 |
| NPIPB5  | 1.624375955 | 1.645185334 | CAAP1              | 5.034408928 | 6.446863057 |
| KLHDC7B | 2.30588839  | 0.546469402 | COX6A1             | 205.3620384 | 238.4235327 |
| PNN     | 20.71627214 | 28.4915415  | ACTG2              | 0.1         | 0.155738792 |
| PNP     | 17.41709233 | 24.49236371 | ACTG1              | 2224.805459 | 2073.017485 |
| SEPP1   | 0.41065621  | 0.253563705 | AMMECR1L           | 6.031058694 | 6.086445706 |
| POR     | 53.40255069 | 53.35885083 | NRTN               | 0.288229264 | 0.301598729 |
| ZW10    | 14.10992714 | 13.76494724 | FAM150B            | 0.951053683 | 0.443464502 |
| SUCLG2  | 12.370565   | 12.8954388  | C1orf43            | 163.2620453 | 162.3332315 |
| SUCLG1  | 31.65585458 | 40.68208708 | RPL36A-<br>HNRNPH2 | 19.63790033 | 21.91845652 |
| PPL     | 0.141640972 | 0.147571871 | COX6B2             | 0.162478986 | 0.122305572 |
| TRPM2   | 0.117673508 | 0.106309605 | MUC3A              | 0.1         | 0.120862861 |
| TRPM7   | 4.474213632 | 3.971997738 | COX6B1             | 243.5665777 | 291.8236119 |
| TRPM4   | 9.48572875  | 6.095199709 | GPRIN2             | 0.1         | 0.113135328 |
| KLHDC8B | 11.14253539 | 9.488142897 | PRR15L             | 0.1         | 0.123054174 |
| RNPS1   | 54.39523252 | 62.66896891 | GPRIN1             | 12.45818162 | 11.52443901 |
| SPPL3   | 6.856559878 | 5.993381693 | UBIAD1             | 8.232493276 | 9.266949112 |
| XPO1    | 30.33174972 | 35.91862835 | C1orf74            | 3.860726648 | 4.23477573  |
| XPO4    | 6.180690689 | 7.293678964 | DIABLO             | 16.66448108 | 17.77321565 |
| XPO6    | 34.11651923 | 33.88247343 | LLPH               | 26.99343015 | 30.61048508 |
| PRX     | 1.251118015 | 0.868023056 | C1orf61            | 0.266644032 | 0.308227076 |
| XPO5    | 23.17977126 | 27.74773981 | EEFSEC             | 10.22768576 | 12.08529918 |
| NHP2L1  | 49.62032868 | 57.94505619 | C1orf63            | 6.111295454 | 6.206753604 |
| MPND    | 3.608481531 | 3.846189025 | CRTAP              | 42.90454034 | 42.87736499 |
| PTGER4  | 11.36929047 | 6.550215078 | RARRES3            | 10.4902554  | 4.512508656 |
| PTGER2  | 0.28853286  | 0.399146501 | RARRES2            | 0.1         | 0.1         |
| PTN     | 1.782108594 | 1.993973615 | RARRES1            | 0.570707803 | 0.365337383 |

|          |             |             |         |             |             |
|----------|-------------|-------------|---------|-------------|-------------|
| PTS      | 12.65720706 | 11.88285278 | HOOK3   | 1.880878262 | 2.029204903 |
| SEPN1    | 35.66959545 | 33.02406947 | FAM151B | 1.379738201 | 1.644683753 |
| TWISTNB  | 9.070004658 | 12.86184186 | UBXN11  | 5.931551868 | 6.165586806 |
| MPP1     | 6.295373039 | 6.701647235 | HOOK2   | 2.906563239 | 2.757704626 |
| MPP2     | 1.1091709   | 0.94066099  | HOOK1   | 0.1         | 0.1         |
| MPP3     | 0.204775685 | 0.2371549   | ALPP    | 0.118120431 | 0.138814963 |
| SLC31A2  | 3.890779755 | 2.715321445 | NABP2   | 62.06640735 | 72.79749052 |
| SLC31A1  | 9.907461664 | 8.531198088 | ALPL    | 0.140024096 | 0.14286691  |
| PTGES2   | 33.5752544  | 48.01528715 | NABP1   | 6.607055188 | 6.032063012 |
| PTGES3   | 73.8287432  | 84.4106601  | DEGS1   | 68.68877411 | 65.41017436 |
| XPO7     | 50.19244041 | 59.30726256 | PYROXD2 | 0.118088885 | 0.112915796 |
| MPP5     | 5.482256049 | 6.019985508 | DEGS2   | 0.210927994 | 0.152803084 |
| MPP6     | 2.012844827 | 2.680381543 | MUC20   | 0.140101333 | 0.114316544 |
| MPP7     | 0.109977199 | 0.107123904 | DNAL4   | 5.585104563 | 5.288693049 |
| KBTBD3   | 0.329978176 | 0.417092552 | DNAL1   | 1.100228787 | 1.121496291 |
| KBTBD4   | 15.31619655 | 15.10078177 | PINX1   | 13.73307396 | 20.46635111 |
| KBTBD6   | 2.147047256 | 2.782018901 | CABIN1  | 14.92350464 | 12.63554181 |
| XPOT     | 46.28768546 | 50.14142073 | UFL1    | 4.645427943 | 4.650782156 |
| KBTBD2   | 18.4439819  | 17.46726864 | C1orf85 | 97.85596851 | 79.97971171 |
| KBTBD7   | 3.590042337 | 3.596174753 | MYOCD   | 1.137939324 | 0.789402554 |
| KBTBD8   | 0.477101498 | 0.81274017  | C1orf86 | 21.73183764 | 21.81087522 |
| PVR      | 17.32321685 | 17.77047184 | DCAKD   | 4.24634605  | 4.41894517  |
| C1RL     | 4.41143617  | 2.479790532 | ACTA2   | 76.22428299 | 46.05625366 |
| XPR1     | 6.624483584 | 6.229968139 | ALS2    | 5.439311641 | 4.550442024 |
| IDI1     | 23.52900726 | 25.82396558 | CRY2    | 1.743558477 | 1.264707406 |
| PXK      | 15.31095947 | 16.26007111 | CRY1    | 3.694807633 | 3.229644369 |
| IDI2     | 2.278971882 | 2.911404795 | OTUB1   | 52.42502717 | 57.26830726 |
| PXN      | 39.75156772 | 43.76469695 | OTUB2   | 1.776713045 | 1.421713125 |
| KLHDC10  | 8.016154506 | 7.371332357 | DNAH1   | 0.448719479 | 0.408410687 |
| BPTF     | 2.020725761 | 2.050774115 | DNAH2   | 0.106943965 | 0.114874357 |
| MPST     | 47.82071696 | 58.6773673  | DNAH5   | 0.273471162 | 0.292938256 |
| IDH1     | 31.52418705 | 33.13793418 | ASAP3   | 7.561154577 | 7.978804489 |
| IDH2     | 26.09062732 | 22.74606337 | ASB13   | 7.666977309 | 9.36033137  |
| SREK1IP1 | 2.759699273 | 3.557288825 | ASB14   | 1.081756415 | 0.917824136 |
| TRPV1    | 1.264668573 | 1.023994176 | ASAP1   | 29.00183693 | 25.0729592  |
| PYY      | 0.1         | 0.170454257 | ASAP2   | 8.860019417 | 7.023119697 |
| TRPV6    | 0.1         | 0.1         | ASB12   | 0.461609817 | 0.444261403 |
| TRPV4    | 0.11443492  | 0.15153399  | CRYZ    | 13.69072452 | 17.15848857 |
| SEPT8    | 9.033610474 | 8.169518194 | FAM156A | 0.491031117 | 0.525452802 |
| SEPT9    | 93.79180263 | 89.45224771 | CRYM    | 0.444961999 | 0.1         |
| SEPT6    | 4.402543484 | 3.709119426 | CDK11A  | 10.12256371 | 10.44627999 |
| SEPT7    | 37.46909096 | 43.21450671 | EYA1    | 4.243132352 | 4.876109699 |
| TRPS1    | 9.798401512 | 8.813444445 | EYA2    | 0.1         | 0.1         |
| TRPT1    | 14.81707563 | 13.48052075 | EYA3    | 3.789868328 | 4.482848708 |
| SEPT1    | 0.68738881  | 0.705809247 | EYA4    | 0.620151552 | 0.517008016 |
| SEPT4    | 0.1         | 0.1         | MUC5B   | 0.102899714 | 0.1         |
| SEPT5    | 3.881191311 | 3.716149415 | CDK11B  | 20.42350085 | 19.68840703 |
| SEPT2    | 83.92348321 | 88.08640438 | FAM155B | 0.1         | 0.1         |
| SEPT3    | 1.762530127 | 1.462350175 | FAM155A | 5.20223736  | 4.396732905 |
| PFDN1    | 55.22956507 | 65.37900845 | UFM1    | 17.71566288 | 17.27821186 |

|         |             |             |                 |             |             |
|---------|-------------|-------------|-----------------|-------------|-------------|
| PFDN2   | 104.1643959 | 135.1296984 | OTUD1           | 1.218128994 | 0.71962629  |
| PFDN4   | 6.584260425 | 8.643232923 | OTUD3           | 0.809695111 | 0.862949849 |
| PFDN5   | 117.3117603 | 132.4403221 | NCKAP1          | 31.6851333  | 30.89222608 |
| PFDN6   | 10.60512626 | 14.65191968 | XYLT2           | 6.151062539 | 6.282361029 |
| ATF6B   | 25.19191073 | 25.31155484 | FGFRL1          | 61.64973997 | 53.08177638 |
| SEPW1   | 93.50554936 | 107.3597294 | CEP95           | 2.203577639 | 3.061795343 |
| NR2C2   | 3.852242385 | 4.162820291 | CEP97           | 1.985826802 | 2.519083812 |
| NR2C1   | 3.318220698 | 3.264128727 | COL23A1         | 2.666307539 | 1.861914163 |
| EHMT2   | 7.119630082 | 6.949522291 | LRPAP1          | 10.29696667 | 10.62691314 |
| EHMT1   | 11.58005811 | 13.6422009  | NAA60           | 17.47858768 | 13.91810381 |
| TMEM97  | 18.57021646 | 21.78159791 | CEP70           | 2.229281922 | 3.037812236 |
| TMEM91  | 1.831709233 | 1.267779305 | ALX3            | 0.83814399  | 1.204291821 |
| TMEM92  | 0.118775308 | 0.140217744 | CEP72           | 4.744650591 | 4.383639223 |
| PSMD8   | 179.7184177 | 185.0164671 | MCMBP           | 22.24395985 | 28.00261499 |
| RABGEF1 | 9.379881447 | 8.896452743 | ALX1            | 7.577298391 | 6.678774356 |
| PSMD9   | 17.96929552 | 20.36615797 | CEP76           | 2.391708859 | 2.680354281 |
| PSMD6   | 52.01950249 | 57.22728467 | CEP78           | 5.840049754 | 7.488231094 |
| PSMD7   | 48.38046818 | 57.38494285 | NAA50           | 19.30859083 | 23.40026447 |
| PSMD4   | 164.86307   | 164.6692183 | AFAP1L2         | 0.637383909 | 0.804940853 |
| TDO2    | 8.794136194 | 11.20864636 | AFAP1L1         | 2.479918456 | 2.257149469 |
| PSMD5   | 14.25224442 | 16.23809413 | SNAPIN          | 34.76710688 | 34.58488072 |
| PSMD2   | 160.4359019 | 159.2776131 | NFATC3          | 3.724319975 | 4.16329819  |
| PSMD3   | 85.33145029 | 92.52163305 | NFATC2          | 0.224268835 | 0.169012402 |
| PSMD1   | 42.66380931 | 43.66278204 | NFATC1          | 0.316850888 | 0.328566717 |
| TMEM8A  | 20.7185183  | 14.69010147 | NFATC4          | 16.90669381 | 14.16975215 |
| TMEM8B  | 4.247754476 | 2.931189183 | CEP85           | 10.87489703 | 11.70182986 |
| TMEM80  | 4.734003468 | 5.794674783 | CEP89           | 16.09421272 | 13.22891409 |
| TMEM81  | 1.231071346 | 1.130393505 | MESP2           | 0.325315328 | 0.237896529 |
| RUFY1   | 25.34241572 | 25.15985257 | CEP57           | 9.274511669 | 10.59965225 |
| PSME3   | 38.82882125 | 48.8230493  | MESP1           | 2.067173999 | 2.206897562 |
| RUFY3   | 1.632988501 | 1.802683038 | PYGB            | 132.9814101 | 110.5498272 |
| TMEM79  | 2.807254326 | 3.132856354 | NRSN2           | 68.66360392 | 53.23030695 |
| RUFY2   | 2.589425891 | 3.373487778 | CHURC1-<br>FNTB | 4.857114167 | 4.919421728 |
| PSME4   | 7.535201776 | 7.80726794  | PYGL            | 31.22330543 | 48.02524562 |
| PSME1   | 105.4541984 | 84.3078404  | CSAD            | 0.868399118 | 0.876140562 |
| PSME2   | 102.9088429 | 90.10216109 | PEA15           | 117.7933296 | 103.3272739 |
| IDNK    | 0.996263558 | 0.534250867 | CEP55           | 48.64431302 | 59.81907648 |
| IDO1    | 11.6417389  | 4.806406376 | CEP68           | 1.402769996 | 1.536433934 |
| TTYH3   | 54.93865612 | 50.97177953 | KAT2B           | 6.335445557 | 6.851384308 |
| TTYH2   | 0.61242919  | 0.627303204 | NSA2            | 52.81170818 | 75.1274552  |
| TTYH1   | 0.1         | 0.109725791 | KAT2A           | 15.78621122 | 18.34612819 |
| AGAP2   | 3.21041724  | 2.303499007 | C18orf54        | 3.156435635 | 3.152970022 |
| AGAP1   | 3.628856325 | 3.771809629 | CEP63           | 2.863183215 | 2.826611158 |
| AGAP4   | 0.615119107 | 0.846426791 | C18orf56        | 1.82350208  | 2.473323428 |
| AGAP3   | 19.30874156 | 21.9649565  | CLDND2          | 0.793394867 | 1.318699505 |
| HESX1   | 0.332028928 | 0.298807501 | CLDND1          | 11.50800823 | 12.62356233 |
| PSMF1   | 28.51502862 | 28.7212362  | ASCL2           | 0.1         | 0.1         |
| PUSL1   | 29.25474648 | 35.42250451 | EPCAM           | 0.190718179 | 0.186365928 |
| ABTB2   | 5.726377335 | 4.003852691 | NSD1            | 5.214353699 | 4.828135713 |

|         |             |             |          |             |             |
|---------|-------------|-------------|----------|-------------|-------------|
| ABTB1   | 3.151202965 | 2.523889505 | CLCF1    | 16.26073925 | 13.04872359 |
| TDP2    | 22.90458652 | 24.1678512  | C18orf32 | 7.768549051 | 6.069176166 |
| TMEM99  | 2.104873207 | 3.768260524 | CEP41    | 3.287882861 | 3.462838377 |
| TDP1    | 5.310918359 | 6.8179151   | CEP44    | 1.474675466 | 1.948573662 |
| PSMG3   | 28.30105316 | 31.98656185 | CSF3     | 0.720225592 | 0.500676042 |
| PSMG4   | 24.74639473 | 32.21136773 | CSF2     | 0.298539912 | 0.19450743  |
| PSMG1   | 23.842645   | 33.71252075 | CSF1     | 112.4565997 | 64.78262373 |
| PSMG2   | 23.62597863 | 27.35959187 | CEP19    | 3.910079815 | 4.001046996 |
| TMEM9B  | 15.9289047  | 15.6638666  | HMGN4    | 39.72966888 | 48.9309186  |
| TMEM51  | 2.65117878  | 2.271186314 | HMGN5    | 2.348126755 | 3.310407609 |
| TDRP    | 4.712951045 | 5.536641632 | LAMP1    | 426.8367885 | 359.4314798 |
| TMEM52  | 1.347264479 | 0.835688056 | PAPOLG   | 1.08472499  | 1.089378654 |
| EFCAB5  | 0.363198208 | 0.37466452  | LAMP3    | 0.488740474 | 0.177718995 |
| TMEM53  | 4.315395635 | 3.308322888 | LAMP2    | 32.01360321 | 31.4453587  |
| EFCAB7  | 1.229648448 | 1.668368949 | PAPOLA   | 26.39261112 | 31.36343892 |
| EFCAB8  | 0.1         | 0.1         | C18orf21 | 8.456094916 | 10.55627592 |
| TMEM47  | 16.02882025 | 11.29046996 | CLCC1    | 10.17865518 | 10.34980476 |
| TRMT112 | 53.61652348 | 63.21862422 | CCDC11   | 0.242410299 | 0.445724136 |
| TMEM43  | 80.09439597 | 76.01983741 | HMGN2    | 220.8071772 | 232.4424842 |
| TMEM44  | 7.15202073  | 5.55239551  | HMGN3    | 12.85576023 | 17.50325721 |
| FASTK   | 23.26655393 | 21.38799196 | C18orf25 | 3.149809786 | 3.017061349 |
| EFCAB1  | 1.168114618 | 1.333226872 | HMGN1    | 91.53265388 | 108.5378539 |
| EFCAB2  | 1.843578665 | 1.809610589 | MAGI1    | 1.731942695 | 1.864367054 |
| TMEM40  | 0.268282711 | 0.185826391 | MAGI3    | 2.855482493 | 2.375684201 |
| TMEM42  | 9.390361967 | 9.097146164 | MAGI2    | 0.283781226 | 0.246969952 |
| PSMA5   | 35.77067554 | 34.24679908 | VASH2    | 0.36352965  | 0.373694563 |
| MZT2B   | 39.46091321 | 41.71650529 | FRMD4A   | 19.79933783 | 22.18531264 |
| TMEM37  | 0.622385892 | 0.734088311 | FRMD4B   | 0.169123539 | 0.170507824 |
| MZT2A   | 16.57417015 | 20.28007609 | VASH1    | 1.538783293 | 1.600991135 |
| PSMA6   | 87.61150934 | 83.38003974 | GOLGA8B  | 0.729567553 | 0.799889928 |
| MBLAC1  | 1.552698824 | 1.186646679 | EBNA1BP2 | 104.8661058 | 133.5304781 |
| PSMA3   | 72.50904436 | 80.04945034 | KAT6B    | 4.770052431 | 4.407794095 |
| MBLAC2  | 2.381971979 | 3.592745086 | KAT6A    | 14.06557753 | 12.10916139 |
| PSMA4   | 67.46632801 | 70.0012197  | TSSK6    | 1.216844373 | 1.360481375 |
| PSMA1   | 50.53264685 | 64.83196776 | TSSK3    | 1.243953707 | 0.973135271 |
| PSMA2   | 78.98372616 | 85.11800706 | TSSK4    | 0.347092875 | 0.342589672 |
| TMEM33  | 5.101917687 | 6.257525835 | TSSK2    | 0.386075314 | 0.590231271 |
| IDUA    | 1.982912839 | 1.30693539  | GOLGA8A  | 0.649285644 | 0.873031964 |
| ZNF518B | 4.30194152  | 4.811643656 | CCDC23   | 8.823648013 | 7.769846389 |
| ZNF518A | 0.616897146 | 0.504647461 | CCDC24   | 5.248964567 | 4.613165809 |
| TMEM74  | 0.592943928 | 0.726389104 | CCDC25   | 24.46286533 | 29.0721743  |
| TMEM70  | 32.75440688 | 40.75370737 | KRBOX4   | 3.23463055  | 3.442354474 |
| PSMA7   | 333.0009638 | 360.9414091 | GOLGA7B  | 0.1         | 0.1         |
| TMEM69  | 36.47648898 | 52.42521741 | CLCA2    | 0.667914581 | 0.708252166 |
| PSMB6   | 137.604068  | 158.6860682 | CCDC33   | 0.898738403 | 0.931707762 |
| PSMB7   | 229.3510045 | 237.2468417 | TRAPPC2  | 2.007302127 | 2.162228119 |
| PSMB4   | 346.6852219 | 370.8010509 | TRAPPC3  | 61.22111084 | 64.83622454 |
| BTAF1   | 4.884049057 | 4.953442303 | CCDC17   | 0.149461705 | 0.276582829 |
| PSMB5   | 133.5759785 | 140.998653  | CCDC18   | 4.121911371 | 4.727413869 |
| PSMB2   | 55.05183555 | 63.11473128 | CCDC19   | 0.331537725 | 0.347983284 |

|         |             |             |         |             |             |
|---------|-------------|-------------|---------|-------------|-------------|
| TMEM65  | 7.083930664 | 7.334525096 | TRAPPC1 | 227.3154751 | 211.7043277 |
| PSMB3   | 135.0688955 | 153.3231387 | CCDC12  | 22.47601817 | 26.53133002 |
| TMEM66  | 116.2731804 | 109.4890608 | CCDC13  | 0.191786708 | 0.113107479 |
| TMEM67  | 6.17893698  | 6.104451359 | CCDC14  | 4.455122574 | 5.557369564 |
| PSMB1   | 107.4584186 | 117.3693432 | TRAPPC4 | 46.20675832 | 47.48779729 |
| TMEM68  | 4.250487971 | 5.182373212 | TRAPPC5 | 63.35831961 | 60.06162862 |
| CLPTM1  | 117.7259053 | 96.79015265 | CCDC15  | 4.276920034 | 4.654588089 |
| TRMT10A | 0.785409955 | 1.128728895 | TRAPPC8 | 5.266884279 | 5.681325611 |
| TRMT10B | 2.733176482 | 3.197601745 | TRAPPC9 | 6.932756963 | 5.770010668 |
| TRMT10C | 15.38972542 | 22.85913068 | CNIH1   | 20.81876612 | 27.45832527 |
| TMEM62  | 4.452725265 | 2.779246383 | CCDC22  | 9.038576763 | 8.353811878 |
| TMEM64  | 11.39797432 | 11.88484507 | CNIH2   | 19.94824475 | 20.79435754 |
| PLXDC2  | 1.624988561 | 1.249362618 | CNIH3   | 0.450430199 | 0.42840535  |
| PLXDC1  | 1.263336337 | 0.960309356 | CNIH4   | 33.03389383 | 33.1561673  |
| PSMB8   | 11.33040239 | 5.189610166 | CCDC47  | 26.35674367 | 28.49293152 |
| TMEM60  | 19.55941303 | 18.28591423 | AMD1    | 27.59290709 | 33.20741    |
| PSMB9   | 7.993341568 | 2.84719154  | IDH3B   | 57.33046823 | 74.60045155 |
| SPSB3   | 11.92234338 | 10.47766409 | EMILIN3 | 0.249324287 | 0.274469556 |
| TMEM59  | 96.56804328 | 86.77483904 | CCDC53  | 17.2274199  | 17.28601565 |
| SPSB2   | 9.513989787 | 10.14115013 | EMILIN2 | 6.94217367  | 5.392557509 |
| SPSB1   | 12.4963278  | 9.665012702 | EMILIN1 | 0.311076798 | 0.1847759   |
| PSMC5   | 60.18930938 | 59.7722916  | CCDC50  | 10.03860612 | 9.40566578  |
| PSMC6   | 34.06693967 | 40.03038478 | CCDC51  | 11.75202123 | 15.10773885 |
| TMEM54  | 12.5042256  | 7.845654082 | IDH3A   | 16.45535943 | 17.80661902 |
| PSMC3   | 106.5672372 | 99.90208887 | CCDC34  | 3.898324496 | 5.366671707 |
| PSMC4   | 79.81833881 | 80.54821515 | CCDC41  | 2.606552134 | 3.583570459 |
| TMEM56  | 3.199409224 | 2.584906764 | CCDC43  | 6.58783487  | 7.265524149 |
| PSMC1   | 19.98299188 | 22.52957463 | CCDC40  | 0.510968687 | 0.52289766  |
| TMEM57  | 14.31838166 | 14.76426826 | TSSC4   | 12.65614317 | 11.62492157 |
| PSMC2   | 51.68425983 | 54.45061861 | TSSC1   | 14.28773979 | 14.51952189 |
| NOMO3   | 6.058267401 | 6.090415622 | CCDC68  | 0.640903026 | 0.503769911 |
| SESN3   | 0.1         | 0.103928218 | CCDC69  | 0.283411393 | 0.209132587 |
| SESN1   | 1.417074628 | 1.667359134 | THSD1   | 1.108612008 | 0.798008503 |
| SESN2   | 17.40236691 | 10.81398961 | NSL1    | 1.074577662 | 1.219559176 |
| SCMH1   | 16.46163092 | 15.98643681 | LMF2    | 91.86157261 | 68.31813196 |
| NOMO1   | 27.64751018 | 30.9317416  | THSD4   | 5.235478883 | 3.397709907 |
| NOMO2   | 22.03851245 | 20.13416405 | TMA16   | 9.092608945 | 12.80639582 |
| UBALD1  | 19.40249145 | 18.79146944 | LMF1    | 4.612074519 | 3.296236083 |
| UBALD2  | 54.76490567 | 53.90871808 | ASCC2   | 27.13169723 | 26.46726304 |
| SQSTM1  | 534.6494219 | 419.253901  | ASCC3   | 8.815887528 | 9.125610215 |
| TRABD2A | 20.03876858 | 18.76916515 | CCDC77  | 7.556071833 | 9.228703622 |
| TMEM25  | 1.434716602 | 1.478202222 | CCDC71  | 28.28328105 | 27.08129747 |
| QKI     | 11.26053897 | 10.73266345 | JAZF1   | 0.440930255 | 0.459349735 |
| TMEM17  | 0.612765851 | 0.601012115 | CCDC73  | 0.898853961 | 1.111993621 |
| TMEM11  | 39.46355643 | 45.47882296 | ASCC1   | 10.18218852 | 10.45392719 |
| TMEM18  | 8.734086993 | 8.395540929 | CCDC57  | 1.274617223 | 1.157489132 |
| TMEM19  | 7.593294297 | 9.335722851 | IDH3G   | 95.34903306 | 94.20249585 |
| ZNF512B | 13.34418637 | 13.6829926  | CCDC58  | 8.124994004 | 14.22393048 |
| USP27X  | 1.370390619 | 1.213237295 | AMFR    | 20.88051079 | 17.44101594 |
| GANAB   | 206.4178296 | 181.0644945 | CCDC59  | 13.27255631 | 18.2915113  |

|              |             |             |         |             |             |
|--------------|-------------|-------------|---------|-------------|-------------|
| ERRF1        | 192.5803944 | 165.6307901 | FRAS1   | 0.772612094 | 0.527657773 |
| KEAP1        | 47.16129906 | 48.18302533 | ZGLP1   | 0.441094243 | 0.512157402 |
| KIF21A       | 0.131291237 | 0.133513778 | CCDC63  | 0.1         | 0.1         |
| KIF21B       | 0.162717839 | 0.152245304 | CCDC64  | 0.150585469 | 0.136118954 |
| SCN1B        | 1.929775639 | 1.227170795 | MAGIX   | 0.66898265  | 0.472408726 |
| ST6GAL1      | 0.228301157 | 0.237414075 | CCDC66  | 1.649308387 | 2.52430147  |
| RSAD2        | 61.23742248 | 10.57762325 | CCDC61  | 4.162586027 | 3.890145345 |
| SFMBT1       | 3.032176987 | 2.460463208 | FRAT1   | 0.785890115 | 0.897573547 |
| RSAD1        | 7.999754002 | 9.273347217 | FRAT2   | 4.458723919 | 5.163648081 |
| KIF20A       | 70.74535503 | 83.65004067 | MAGOH   | 51.77640249 | 71.78594812 |
| KIF20B       | 6.374425545 | 8.111189687 | UHMK1   | 11.22676442 | 11.13046207 |
| TGOLN2       | 26.544688   | 22.9547182  | CIRH1A  | 43.82296913 | 58.35791848 |
| GS1-259H13.2 | 0.14634369  | 0.199270739 | NSMF    | 18.25233712 | 23.04369226 |
| SYMPK        | 18.70719089 | 17.77021526 | C2CD4A  | 1.215934542 | 0.62760933  |
| PTGDR2       | 1.02833897  | 1.132518028 | C2CD4C  | 0.249667571 | 0.242487194 |
| TECR         | 98.90453144 | 88.06864175 | HNRNPLL | 10.72040411 | 9.822882504 |
| N4BP2L1      | 0.338699664 | 0.282609942 | UGCG    | 28.63210385 | 23.60590364 |
| N4BP2L2      | 12.03710529 | 12.5298307  | ZNHIT2  | 15.45288509 | 15.01208378 |
| LARP1B       | 2.292242558 | 2.082715184 | ZNHIT1  | 57.51293351 | 62.21478962 |
| SCML2        | 1.721157047 | 1.964428076 | ZNHIT3  | 5.989825006 | 7.180960016 |
| SCML1        | 3.515721454 | 4.244461481 | ZNHIT6  | 5.901239901 | 6.911870438 |
| SUPT3H       | 0.676084242 | 0.741682183 | SNAP91  | 2.216703933 | 1.266379893 |
| NR5A2        | 0.678476809 | 0.520289439 | PM20D2  | 1.213556658 | 1.635093889 |
| ZNF780A      | 1.701321714 | 1.836879781 | CABYR   | 4.443899004 | 4.98740703  |
| RAMP2        | 1.489779384 | 0.714298293 | C2CD2L  | 7.069073741 | 6.322571507 |
| STAMBPL1     | 2.6781256   | 2.846633809 | SLC44A3 | 1.530448177 | 0.811861345 |
| CAMK2N1      | 5.867453548 | 5.290974339 | SLC44A1 | 0.208633029 | 0.177565978 |
| CAMK2N2      | 11.06324742 | 8.718938611 | SLC44A2 | 16.5680372  | 13.32707551 |
| TEFM         | 2.864275297 | 3.66087717  | MAGT1   | 25.62355129 | 24.34678341 |
| KIF26A       | 0.1         | 0.1         | CLDN22  | 0.253474969 | 0.401355855 |
| KIF26B       | 0.984034355 | 0.619226698 | CLDN23  | 0.286300686 | 0.309034748 |
| RAMP1        | 143.3370922 | 117.170819  | USMG5   | 108.3194222 | 135.2970756 |
| DCLRE1B      | 12.00435808 | 12.82051791 | CLDN11  | 0.551586616 | 0.6374019   |
| DCLRE1A      | 2.71739258  | 2.656544495 | UGDH    | 44.55533372 | 40.02702268 |
| DCLRE1C      | 2.670245373 | 2.770384352 | C2CD4D  | 0.1         | 0.1         |
| OSTF1        | 6.229603027 | 4.972118888 | CLDN15  | 1.513971875 | 1.492554338 |
| SLC30A7      | 3.755690053 | 3.337949494 | HNRNPH1 | 98.66837281 | 112.6357898 |
| SLC30A6      | 4.871355952 | 4.836697151 | CLDN12  | 5.153184318 | 4.772243335 |
| SLC30A9      | 14.48577219 | 15.94549938 | HNRNPH2 | 22.51376164 | 23.06674754 |
| SLC30A3      | 0.184991864 | 0.145514314 | HNRNPH3 | 52.93109699 | 61.32033151 |
| SLC30A5      | 19.2554339  | 20.30992502 | CSTB    | 1103.180359 | 1058.072974 |
| ATG9B        | 0.111350508 | 0.116208943 | HAAO    | 0.1         | 0.1         |
| ATG9A        | 28.90291887 | 30.29360308 | SAA4    | 0.1         | 0.1         |
| SLC30A4      | 1.008874685 | 0.679731545 | CST6    | 0.1         | 0.1         |
| LMTK3        | 0.181428334 | 0.209014987 | NT5C    | 20.0847782  | 20.90016184 |
| LMTK2        | 1.65633157  | 1.663212681 | CST3    | 77.29420864 | 65.47888979 |
| SLC30A1      | 16.00975677 | 11.25766049 | AMN1    | 1.152915057 | 1.139724365 |
| ATAD3B       | 26.32875901 | 28.10868434 | NT5E    | 170.6146141 | 152.1423124 |
| ATAD3A       | 40.74215546 | 42.3811811  | LMNA    | 455.7321788 | 392.3417826 |



|          |             |             |         |             |             |
|----------|-------------|-------------|---------|-------------|-------------|
| SUPT7L   | 7.889948607 | 8.067215839 | NT5M    | 1.457171877 | 1.542300507 |
| ATAD3C   | 0.530795767 | 0.628680782 | LMLN    | 2.09700883  | 1.899227797 |
| HNRNPUL1 | 115.1075877 | 130.1900619 | IFNB1   | 1.027701375 | 0.497437495 |
| HNRNPUL2 | 25.60629044 | 27.81792561 | CT62    | 0.295122167 | 0.274151015 |
| SCN8A    | 0.113486832 | 0.106419897 | SAA1    | 0.1         | 0.154711116 |
| SUPT6H   | 35.64961325 | 32.22253427 | SAA2    | 0.125428917 | 0.1         |
| CALHM2   | 0.742575765 | 0.391970573 | CWC25   | 6.908521392 | 5.963643038 |
| INHBB    | 0.148658705 | 0.157905348 | CWC27   | 10.46167147 | 13.77432811 |
| INHBA    | 7.432892888 | 4.005546691 | AMOT    | 0.458051714 | 0.519660918 |
| CALHM3   | 0.1         | 0.1         | FAM162A | 31.96510306 | 48.9686867  |
| SUPT5H   | 68.22245266 | 64.79387531 | RBMX2   | 23.25367776 | 28.67318952 |
| COL5A1   | 37.30302346 | 29.29627321 | CWC22   | 6.37294853  | 7.650634247 |
| COL5A2   | 38.99973683 | 30.69064353 | SACS    | 9.611599462 | 10.51530055 |
| ATG4C    | 3.590118828 | 4.879754893 | HADH    | 18.24333825 | 22.01347446 |
| ATG4B    | 10.70257224 | 11.0624394  | LMO1    | 0.1         | 0.1         |
| ATG4A    | 4.500367453 | 5.261763832 | CHRNB1  | 3.169751286 | 2.672389858 |
| ATG4D    | 7.011646498 | 6.44505474  | WNT5B   | 107.998806  | 82.88189761 |
| ATAD2B   | 0.885109604 | 0.874789071 | LMO4    | 53.41613939 | 47.86603082 |
| PDAP1    | 45.2893034  | 49.84398037 | LMO3    | 0.75057691  | 0.612911768 |
| TEN1     | 5.779728375 | 6.685423684 | WNT5A   | 3.220272585 | 3.102603705 |
| CLUAP1   | 2.997330995 | 3.064309272 | LMO2    | 0.326465898 | 0.294040974 |
| RAN      | 132.8206445 | 173.0656006 | HMHA1   | 3.790476031 | 4.733383795 |
| RB1      | 5.815511402 | 5.315881287 | LMO7    | 8.053850337 | 6.39939619  |
| GABPB2   | 1.551776872 | 1.5512335   | CT83    | 0.1         | 0.1         |
| TRRAP    | 4.968511245 | 4.477445184 | FAM161A | 1.176710404 | 1.253186513 |
| COL12A1  | 9.409862659 | 7.762945461 | FAM161B | 3.365013514 | 2.369387252 |
| GABPB1   | 4.729995851 | 4.779309953 | CHRNA5  | 0.788286308 | 0.888366215 |
| ZXDA     | 0.669028207 | 0.727264916 | KLHDC2  | 15.04242174 | 12.16478573 |
| ZXDB     | 1.886343093 | 1.572721238 | KLHDC3  | 61.41743092 | 66.14929539 |
| ZXDC     | 4.804207012 | 4.760845386 | KLHDC4  | 5.147298861 | 5.302230622 |
| IER5     | 7.531117757 | 9.08052614  | KLHDC1  | 0.872222623 | 0.458397741 |
| NFRKB    | 8.135869769 | 8.109665457 | CWC15   | 16.61496812 | 17.30547936 |
| IER2     | 56.0806687  | 50.27664527 | SAE1    | 80.22926344 | 78.78328938 |
| IER3     | 26.0337423  | 23.89710419 | KLHDC9  | 1.109516593 | 0.931707762 |
| CCRN4L   | 7.536573922 | 6.120323341 | WNT2B   | 2.455685434 | 1.887127844 |
| TEP1     | 1.251342121 | 0.935954184 | SNAPC5  | 11.88003478 | 12.33871215 |
| CLPSL1   | 0.1         | 0.1         | FAM166A | 23.24990004 | 24.95891765 |
| CLPSL2   | 0.1         | 0.1         | SNAPC1  | 4.109793592 | 5.881997288 |
| HPRT1    | 24.03797356 | 33.8386515  | SNAPC2  | 32.27627477 | 29.08131306 |
| C4orf51  | 0.1         | 0.143846532 | SNAPC3  | 13.19272893 | 11.74960566 |
| MEF2BNB  | 11.1704458  | 10.16027486 | SNAPC4  | 4.827783574 | 6.028858359 |
| POM121   | 7.773530472 | 8.408123854 | SAFB    | 27.2609022  | 29.92313746 |
| NOLC1    | 46.02718133 | 58.2519081  | IGDCC4  | 0.124032973 | 0.122879979 |
| TERT     | 0.125859272 | 0.155391985 | PEAK1   | 1.816554829 | 1.334753057 |
| CHST11   | 6.044494245 | 5.495632008 | RBMS1   | 14.70425256 | 15.30530447 |
| CHST12   | 22.59858452 | 21.06103878 | HAGH    | 16.20166907 | 16.11269906 |
| GALR2    | 0.214851755 | 0.1         | RBMS2   | 3.381391051 | 2.748958838 |
| CHST10   | 3.776999982 | 4.818003616 | PAPPA2  | 0.711254575 | 0.697243258 |
| CHST15   | 0.1         | 0.1         | RBMS3   | 0.927669848 | 0.828008341 |
| CHST14   | 8.750667595 | 7.03617029  | FAM169A | 0.404869866 | 0.296951001 |

|          |             |             |          |             |             |
|----------|-------------|-------------|----------|-------------|-------------|
| SERF2    | 58.62662087 | 58.23474745 | FAM168B  | 14.23620578 | 18.01580982 |
| BRAP     | 8.11915241  | 7.77718233  | UGP2     | 9.922820612 | 11.08014556 |
| RDX      | 22.01441394 | 23.56267972 | FAM168A  | 9.885757306 | 9.042207616 |
| UPF3B    | 7.706842552 | 11.53376753 | WNT11    | 0.296692009 | 0.240441708 |
| BRAF     | 1.882534313 | 1.842705231 | PCED1A   | 30.07583553 | 26.39181768 |
| UPF3A    | 9.262751406 | 10.32537132 | PCED1B   | 2.373286251 | 2.025522997 |
| REL      | 0.480815688 | 0.543641648 | CYHR1    | 46.9569462  | 41.18174041 |
| TCF25    | 34.34202165 | 31.2254982  | FAM167B  | 31.9446112  | 29.23987322 |
| TCF24    | 0.354455234 | 0.205983332 | ALDH16A1 | 7.55984209  | 7.229818804 |
| TCF20    | 5.751099081 | 5.277597882 | CLDN1    | 19.13776517 | 11.092854   |
| MRC2     | 17.82169729 | 14.90795152 | FAM134C  | 5.992084971 | 4.706337779 |
| DSTYK    | 4.284215885 | 4.077222521 | FAM134B  | 2.963331648 | 2.912560103 |
| RFK      | 6.030160541 | 6.334889401 | FAM134A  | 31.63782549 | 26.4614588  |
| BRD3     | 5.475220557 | 5.820925522 | PPP4R1   | 19.05554897 | 18.14303553 |
| TCF19    | 16.96413542 | 16.93651147 | PPP4R2   | 25.93350093 | 25.19311241 |
| BRD2     | 20.86524553 | 20.48239638 | PPP4R4   | 1.402811237 | 1.030231158 |
| BRD1     | 3.207553471 | 3.379067029 | DICER1   | 2.516338464 | 2.929797244 |
| IFNGR1   | 14.85366112 | 14.67803715 | FAM133B  | 1.467138868 | 1.887127844 |
| IFNGR2   | 23.70145811 | 24.73480194 | CLDN4    | 1.036314659 | 1.092689319 |
| TCF12    | 8.12805211  | 9.546197468 | CLDN3    | 0.222334247 | 0.1291163   |
| TET2     | 2.761307747 | 2.466744345 | CLDN9    | 0.1         | 0.1         |
| MRAS     | 3.688702288 | 3.236312154 | CLDN8    | 0.1         | 0.1         |
| TET3     | 0.786214915 | 0.855240469 | CLDN7    | 1.030933784 | 0.857023799 |
| SF3B4    | 79.40672656 | 77.55473486 | MRPL18   | 62.20756551 | 75.69312677 |
| SF3B5    | 148.904811  | 169.1124966 | MRPL19   | 1.965121864 | 3.289520102 |
| SF3B2    | 76.50871153 | 78.67836597 | MRPL16   | 31.92125595 | 35.09153577 |
| SF3B3    | 23.15204296 | 23.94025268 | IL20RB   | 0.988272933 | 0.607394554 |
| NOTCH2NL | 0.45128587  | 0.490171545 | MRPL17   | 26.40499992 | 24.63608202 |
| BRD9     | 22.26925359 | 22.90135658 | MRPL14   | 55.36731593 | 64.37901609 |
| BRD8     | 12.79784443 | 13.72880058 | MRPL15   | 68.18023261 | 87.01360376 |
| BRD7     | 15.64943065 | 18.58290633 | MRPL12   | 69.14657403 | 93.43842405 |
| SF3B1    | 56.96072066 | 57.39540224 | MRPL13   | 47.3241788  | 59.45066588 |
| BRD4     | 14.68193788 | 14.55088236 | MRPL10   | 17.42621619 | 20.56237723 |
| SF3A3    | 49.28904139 | 59.48353733 | MRPL11   | 23.17918532 | 27.57960472 |
| SF3A1    | 29.13995209 | 31.10840454 | MRPL20   | 62.56138447 | 82.12188297 |
| SF3A2    | 65.7160371  | 65.58806428 | UGT8     | 0.137392954 | 0.180097768 |
| BRF2     | 21.63380431 | 19.92683182 | KCNMB3   | 0.735041467 | 0.797586576 |
| BRF1     | 8.700649497 | 8.593084393 | KCNMB4   | 2.145066141 | 1.552364178 |
| AGBL5    | 6.53854133  | 7.645341962 | AMZ2     | 29.0405346  | 33.12879544 |
| MORN1    | 1.884067742 | 1.678475156 | CTC1     | 2.01731947  | 1.731262115 |
| MORN4    | 4.239800354 | 2.872107381 | CADM4    | 2.869461456 | 2.384291483 |
| MORN2    | 9.564807546 | 11.51358959 | COL24A1  | 0.795347861 | 1.144343448 |
| AGBL3    | 0.460973297 | 0.533005831 | CADM2    | 0.642288904 | 0.402019307 |
| MORN3    | 0.324314667 | 0.132032959 | MRPL27   | 44.58743775 | 42.04859475 |
| AGBL2    | 0.380384687 | 0.309733142 | MRPL28   | 60.28251826 | 65.74543347 |
| HYLS1    | 11.95871791 | 15.30518516 | FAM136A  | 23.01227563 | 30.82203962 |
| PUS10    | 0.399981127 | 0.557592076 | MRPL23   | 44.13955959 | 50.99199618 |
| ITGA2B   | 0.442809866 | 0.278016394 | MRPL24   | 81.30539411 | 108.3013218 |
| ATHL1    | 0.897986635 | 0.669777118 | MRPL21   | 27.72726868 | 33.37754098 |
| MREG     | 0.310198133 | 0.411715682 | MRPL22   | 12.21596122 | 16.03424157 |

|          |             |             |          |             |             |
|----------|-------------|-------------|----------|-------------|-------------|
| TEX2     | 12.05832791 | 10.39830228 | MRPL30   | 4.131492393 | 5.808052908 |
| CTDNEP1  | 144.10427   | 152.1235631 | FAM135A  | 0.700545245 | 1.045710333 |
| CACNB1   | 1.946477776 | 1.666242185 | EZH1     | 2.951393807 | 2.583057615 |
| CACNB3   | 13.55536419 | 11.36178412 | EZH2     | 15.97451285 | 19.90284093 |
| TEX9     | 0.440478058 | 0.646992074 | MRPL38   | 30.28121805 | 31.87144773 |
| BRI3     | 66.35352612 | 57.99818347 | MRPL39   | 12.66126572 | 16.35757906 |
| MRI1     | 9.878679141 | 9.709222147 | MRPL36   | 83.01897628 | 92.11044802 |
| KLC1     | 38.93871878 | 35.78336231 | MRPL37   | 72.3616737  | 92.34371122 |
| RLF      | 5.303439902 | 5.281313131 | CTCF     | 17.93559446 | 18.91533575 |
| RAD51AP1 | 9.372925154 | 11.36394028 | MRPL34   | 57.95483118 | 78.31197641 |
| KLC4     | 2.365959953 | 2.362481057 | MRPL35   | 6.297751255 | 7.595015757 |
| KLC3     | 13.33632737 | 12.93166776 | MRPL32   | 41.2202797  | 52.86209918 |
| KLC2     | 23.75023319 | 23.32075124 | MRPL33   | 38.11068335 | 54.52387315 |
| BTBD1    | 17.10710797 | 20.09888753 | MRPL41   | 132.730578  | 151.2403029 |
| BTBD3    | 12.00676981 | 12.0443505  | MRPL42   | 10.54150203 | 15.19380375 |
| BTBD2    | 42.70480965 | 42.16744819 | MRPL40   | 28.53703972 | 32.18346228 |
| SAFB2    | 18.40350898 | 21.39728347 | CTBS     | 6.817981963 | 4.884800538 |
| NKX6-1   | 13.87770656 | 14.32004675 | MESDC2   | 10.00539314 | 8.151785776 |
| BTBD7    | 2.410032078 | 3.027912658 | MRPL49   | 30.73666453 | 35.18144131 |
| BTBD6    | 31.84936465 | 28.75651252 | MRPL47   | 32.00915997 | 42.81164142 |
| BTBD9    | 2.616336726 | 2.513189249 | MRPL48   | 21.04160002 | 30.90397327 |
| BTBD8    | 0.352015897 | 0.305650263 | MRPL45   | 22.09930908 | 29.38372297 |
| ZZEF1    | 10.40862091 | 8.260392733 | MRPL46   | 13.60733201 | 15.3457023  |
| ITGA10   | 22.72472762 | 17.87964153 | MRPL43   | 36.95618255 | 39.16010525 |
| SRXN1    | 29.48385792 | 33.17952699 | MRPL44   | 15.64377452 | 17.07673509 |
| BRK1     | 192.5759471 | 202.0360985 | MESDC1   | 6.962131964 | 7.394821273 |
| DUSP18   | 2.55203648  | 2.092779457 | MRPL52   | 31.80585236 | 41.01477975 |
| DUSP16   | 9.663907453 | 8.256955426 | MRPL53   | 36.74349613 | 33.4564334  |
| DUSP14   | 20.98171458 | 26.88487843 | MRPL50   | 17.45101415 | 25.60450995 |
| DUSP11   | 7.276240705 | 7.575952875 | MRPL51   | 121.7289129 | 146.6685296 |
| DUSP12   | 18.37391221 | 22.21216443 | KCNMA1   | 7.257446791 | 6.366215494 |
| DUSP10   | 2.313170992 | 1.527764991 | HAP1     | 0.179234281 | 0.166003854 |
| EFHD2    | 43.3963102  | 46.6708899  | CTF1     | 1.50493237  | 1.036271021 |
| EFHD1    | 2.084068869 | 1.591222761 | MRPL54   | 49.79977701 | 54.16340752 |
| C4orf36  | 0.457580078 | 0.793008021 | MRPL55   | 28.84537516 | 29.47066904 |
| C4orf33  | 2.60734625  | 2.342047031 | NTF4     | 0.1         | 0.1         |
| C4orf32  | 1.681788697 | 2.304422201 | HAS3     | 52.75397615 | 49.11481939 |
| REXO1    | 12.99908948 | 14.61614146 | HAS2     | 2.067010182 | 1.617746036 |
| DUSP28   | 0.727710183 | 1.055366442 | HARS     | 44.76769308 | 48.5081522  |
| REXO2    | 53.93065134 | 62.24311215 | CEPT1    | 9.377838003 | 9.113997733 |
| REXO4    | 17.19489453 | 20.10566992 | KRTAP2-3 | 0.1         | 0.1         |
| DUSP22   | 3.212630004 | 3.11621608  | USP9X    | 12.5547332  | 9.707810802 |
| DUSP23   | 5.576140153 | 7.61144003  | TMCO4    | 1.480198105 | 0.908320636 |
| DALRD3   | 35.252079   | 32.35805759 | TMCO3    | 28.79611545 | 27.97328196 |
| RP2      | 8.995859487 | 7.884836754 | TMCO1    | 22.47131006 | 23.0952058  |
| EFHC1    | 2.941026113 | 2.963828007 | TMCO6    | 3.995664713 | 4.496057449 |
| C4orf48  | 73.34807375 | 64.99559093 | APITD1   | 6.598447644 | 8.602366531 |
| RP9      | 11.59323523 | 13.56773027 | SAT2     | 25.731134   | 24.30468138 |
| C4orf47  | 0.880688588 | 0.657425994 | SAT1     | 97.94009659 | 76.026134   |
| C4orf46  | 14.1293474  | 16.37139961 | CTGF     | 251.412086  | 105.052436  |

|         |             |             |           |             |             |
|---------|-------------|-------------|-----------|-------------|-------------|
| RPE     | 5.167961145 | 6.135479882 | EIF4ENIF1 | 10.81030109 | 10.22296888 |
| AMBRA1  | 9.097969005 | 8.740857405 | SARS      | 122.6534054 | 118.4025199 |
| MRM1    | 2.027270504 | 2.326054708 | HAT1      | 33.38128681 | 37.85962865 |
| DCAF15  | 18.16100639 | 18.8606456  | ISG20L2   | 17.73372799 | 22.85223956 |
| DCAF16  | 3.354539543 | 4.590056216 | SAV1      | 5.392712076 | 5.272634443 |
| DCAF17  | 1.740191312 | 1.519354677 | CTIF      | 5.473654423 | 4.453146993 |
| C4orf19 | 0.385603502 | 0.395692913 | MYPOP     | 8.799842885 | 10.18442355 |
| DCAF10  | 9.333450894 | 8.341066961 | BPMS      | 0.752449318 | 0.614387966 |
| DCAF11  | 9.454609585 | 9.364923011 | TFPI2     | 14.66081208 | 11.01272728 |
| DCAF12  | 16.41703142 | 17.33853105 | PTPRE     | 0.687020079 | 0.451539391 |
| CACNG4  | 18.21478929 | 15.50002701 | MLXIPL    | 0.1         | 0.1         |
| DCAF13  | 57.79305323 | 71.88746088 | PTPRB     | 0.530940702 | 0.335684783 |
| DDHD2   | 10.34571011 | 11.78678722 | PTPRA     | 32.54802134 | 28.32025791 |
| DDHD1   | 1.502896917 | 1.496647874 | GDPGP1    | 1.984243206 | 1.912150235 |
| KLF4    | 23.8704104  | 14.23954237 | NADK2     | 5.570667426 | 5.99266234  |
| OXR1    | 10.0260934  | 9.708073663 | WAPAL     | 10.00370017 | 9.54812649  |
| KLF3    | 7.853369565 | 6.57413764  | DIS3L2    | 2.942910959 | 3.195814968 |
| KLF2    | 6.03280444  | 6.398163562 | HAX1      | 103.693057  | 107.8151447 |
| KLF8    | 0.1         | 0.1         | MTRF1L    | 5.190635702 | 5.62873338  |
| KLF7    | 3.087829875 | 3.372626543 | AHDC1     | 7.47662472  | 7.418776233 |
| KLF6    | 71.48564571 | 60.9688055  | MAK16     | 12.16479012 | 16.98646009 |
| KLF5    | 12.04617137 | 12.05210234 | NTN4      | 16.84225109 | 11.39755932 |
| C4orf29 | 1.577287497 | 1.778107475 | PTPLB     | 7.540368227 | 9.631356936 |
| KLF9    | 0.249629254 | 0.299431001 | NTN1      | 2.04577339  | 1.489317947 |
| RUNDC1  | 5.915341916 | 5.366514479 | PTPLA     | 55.19025343 | 52.76155395 |
| C4orf27 | 6.978417428 | 8.671924914 | PTPN1     | 26.30899627 | 28.54024925 |
| C4orf22 | 0.587519315 | 0.339317201 | CTNS      | 12.18796357 | 10.31324368 |
| C4orf21 | 1.16904992  | 1.377615764 | PTPN9     | 9.3972374   | 10.0387918  |
| OXTR    | 50.89574525 | 25.21787955 | PTPN6     | 0.1         | 0.131054137 |
| DIXDC1  | 1.781468465 | 2.557185249 | PTPN4     | 0.748192719 | 0.784454345 |
| BROX    | 5.831772799 | 6.342325734 | PTPN2     | 4.507802903 | 4.961962097 |
| OXSM    | 6.586765607 | 7.384167945 | PTPN3     | 1.398041033 | 1.462729208 |
| XRN1    | 2.778745722 | 2.323528841 | PPP5D1    | 0.424864681 | 0.293299459 |
| XRN2    | 45.92601724 | 50.15282685 | KDELRL1   | 191.3220734 | 163.4620408 |
| TFAM    | 5.586379967 | 7.720574649 | THUMPD2   | 1.894479077 | 2.029845746 |
| HRASLS  | 3.814296378 | 2.682284381 | THUMPD3   | 16.8899009  | 17.60373295 |
| TELO2   | 8.997905011 | 10.34325082 | SPATA20   | 5.886930276 | 4.058137414 |
| IGSF8   | 13.11021204 | 8.478165119 | THUMPD1   | 4.358687107 | 5.19876786  |
| IGSF3   | 0.121352765 | 0.14065671  | SPATA21   | 16.40864843 | 17.67250722 |
| KLK1    | 0.1         | 0.1         | SPATA24   | 3.680788763 | 3.12548627  |
| ANP32A  | 22.27458235 | 33.78096159 | ACVR1     | 12.36698461 | 9.67504585  |
| KLK5    | 0.232952724 | 0.171198016 | ANK2      | 1.779895042 | 1.80962647  |
| KLK9    | 0.1         | 0.1         | ANK3      | 0.103052366 | 0.121794457 |
| KLK8    | 0.145253726 | 0.1         | ANK1      | 13.21297761 | 11.40525789 |
| IGSF9   | 0.125693015 | 0.1         | SPATA17   | 0.657417135 | 0.842944673 |
| KLK7    | 0.1         | 0.1         | SPATA13   | 1.70223012  | 1.636619607 |
| KLK6    | 0.168088174 | 0.172924311 | KDELRL2   | 146.9259342 | 127.9581434 |
| BCL11B  | 0.112916777 | 0.1         | ALPK3     | 0.190416256 | 0.181548043 |
| ANKEF1  | 1.717107497 | 1.555434195 | KDELRL3   | 47.90239027 | 35.99204042 |
| ANP32E  | 19.79491745 | 25.9907326  | ALPK2     | 10.37216814 | 10.17226229 |

|              |             |             |           |             |             |
|--------------|-------------|-------------|-----------|-------------|-------------|
| SPRTN        | 4.63364327  | 6.204713359 | ALPK1     | 0.626986395 | 0.401022374 |
| ANP32B       | 146.1547342 | 166.874637  | KIAA1211L | 0.580549312 | 0.359659163 |
| CENPBD1      | 2.937103746 | 2.41686911  | CTR9      | 10.03452129 | 12.2380307  |
| KLLN         | 0.221466628 | 0.195402345 | WNK4      | 0.653589264 | 0.36351527  |
| MRS2         | 4.198668585 | 6.130132039 | ANKH      | 11.32962902 | 11.40407087 |
| SERP1        | 44.53373721 | 41.31054275 | HIVEP1    | 1.908986318 | 1.558853279 |
| KIF13A       | 13.02543779 | 10.7339664  | HIVEP3    | 1.951513016 | 1.804860081 |
| KIF13B       | 10.26386493 | 8.550496218 | HIVEP2    | 3.480923247 | 3.046387327 |
| TFE3         | 41.34789884 | 35.44210906 | CTSA      | 328.6628641 | 283.8127917 |
| TFEB         | 1.92092736  | 1.43150512  | IFITM10   | 1.332599723 | 1.05010671  |
| MAPRE3       | 5.656286308 | 5.376496365 | ANLN      | 80.50053028 | 91.44467155 |
| MAPRE1       | 80.88889012 | 84.25836176 | CTRL      | 0.451616088 | 0.790415952 |
| MRRF         | 13.87103264 | 20.39316423 | WNK1      | 11.70023172 | 10.04726037 |
| MAPRE2       | 8.103597147 | 6.767167966 | WNK2      | 0.106304767 | 0.104501719 |
| IFI6         | 610.1046452 | 307.4639862 | WNK3      | 0.681663773 | 0.659208535 |
| LOC100996350 | 0.643156032 | 0.465010245 | PTPRU     | 0.146203555 | 0.139588224 |
| RYK          | 14.9861069  | 18.50838974 | PTPRR     | 0.471186603 | 0.78908854  |
| PUS7L        | 2.343894226 | 3.027844732 | PTPRS     | 17.07060906 | 16.21604443 |
| DFNA5        | 18.36103002 | 16.4541414  | USPL1     | 8.88274662  | 9.829617357 |
| GALNT12      | 0.80281435  | 0.805263854 | PTPRO     | 0.474629055 | 0.501238041 |
| GALNT11      | 11.99039146 | 13.23694937 | CTSZ      | 34.8380872  | 48.47079269 |
| GALNT14      | 0.1         | 0.1         | PTPRM     | 0.1         | 0.1         |
| GALNT13      | 3.172683225 | 3.197729626 | PTPRJ     | 8.002895236 | 5.213503351 |
| GALNT16      | 5.067260644 | 3.982448119 | CTSV      | 2.946016499 | 3.074416241 |
| GALNT18      | 0.120914363 | 0.1         | PTPRK     | 26.8922379  | 21.50688781 |
| GALNT10      | 57.95641709 | 55.78484549 | PTPRH     | 15.38912326 | 10.79951382 |
| EFTUD1       | 10.95549071 | 8.253670177 | PTPRF     | 16.60993972 | 14.56043766 |
| EFTUD2       | 35.17676833 | 41.23625817 | CTSS      | 0.226494465 | 0.163223561 |
| OXA1L        | 81.54775535 | 96.01830637 | PTPRG     | 9.52937821  | 8.061616113 |
| COL4A2       | 51.06433541 | 39.36154562 | BABAM1    | 50.21321444 | 52.99261612 |
| COL4A1       | 14.83755607 | 10.38437461 | CTSO      | 4.085351967 | 2.199431158 |
| KIF16B       | 1.820071783 | 1.76592387  | CTSL      | 2271.922674 | 1790.856581 |
| COL4A6       | 0.492462617 | 0.682429509 | CTSK      | 1.219392156 | 2.190389475 |
| COL4A5       | 4.897820572 | 4.867713009 | CTSH      | 3.70411984  | 2.673407778 |
| C5AR1        | 0.166547323 | 0.179193352 | CTSF      | 13.12651185 | 12.32965558 |
| ADIPOR1      | 57.13891927 | 56.96066668 | CTSD      | 542.321571  | 444.9154887 |
| ADIPOR2      | 23.66683815 | 23.23506963 | CTSC      | 14.85975155 | 19.75053628 |
| PSORS1C1     | 0.128607531 | 0.222557818 | CTSB      | 1946.569149 | 1639.3789   |
| PSORS1C2     | 0.1         | 0.1         | LEPRE1    | 84.22593257 | 73.51180391 |
| PCSK1N       | 32.88287771 | 27.47317844 | ANO8      | 3.328186286 | 3.307323135 |
| DMAP1        | 23.33981246 | 20.99960099 | ANO9      | 0.1         | 0.1         |
| NR4A2        | 1.144616444 | 0.908907051 | ANO6      | 12.51745804 | 10.95594946 |
| NR4A1        | 2.424022115 | 2.254120792 | ANO7      | 0.238436058 | 0.441467615 |
| KIF18A       | 11.546383   | 13.7144052  | ANO1      | 0.173944477 | 0.175425307 |
| NR4A3        | 0.955839473 | 0.542061567 | CTU2      | 7.302950014 | 8.24314451  |
| KIF18B       | 11.61915701 | 13.20274231 | CTU1      | 5.94359404  | 8.462472204 |
| ARAP2        | 0.127615297 | 0.119717829 | CTTN      | 80.42576291 | 70.79485556 |
| CKAP2        | 41.58877054 | 50.66671971 | LNP1      | 0.732694848 | 0.76926777  |
| ARAP3        | 0.188856232 | 0.12819777  | SLC43A2   | 9.747393813 | 9.2334975   |

|                     |             |             |          |             |             |
|---------------------|-------------|-------------|----------|-------------|-------------|
| ARAP1               | 12.23578594 | 10.2743586  | SLC43A3  | 27.72204803 | 29.64366947 |
| CKAP5               | 43.50879712 | 47.32130448 | SLC43A1  | 0.551037132 | 0.758736179 |
| CKAP4               | 94.67664949 | 82.99984107 | CAMKK1   | 0.467446464 | 0.715545195 |
| AGAP9               | 0.970570205 | 0.939164212 | CAMKK2   | 4.902920127 | 4.760769764 |
| AGAP6               | 2.107208429 | 2.328058683 | AASDHPPT | 14.51779585 | 20.67617676 |
| AGAP5               | 0.50687315  | 0.436385678 | SCARB2   | 59.52424322 | 51.67714739 |
| AGAP7               | 0.399184647 | 0.191552858 | SCARB1   | 44.90845005 | 52.81917053 |
| SLFN5               | 3.002305976 | 2.228092473 | GXYLT1   | 1.501276265 | 1.729587484 |
| TFPI                | 19.02727041 | 16.77216894 | GXYLT2   | 7.756684648 | 7.24548256  |
| TFPT                | 27.39058782 | 22.94138697 | SBF1     | 13.62067777 | 13.05682248 |
| TCFL5               | 7.521610996 | 8.461499052 | SBF2     | 3.892114988 | 3.495769212 |
| SPRY4               | 20.84057498 | 17.50648707 | SCARA3   | 22.1094047  | 17.14244401 |
| HAGHL               | 1.926529046 | 2.622830898 | ZGPAT    | 16.11486078 | 15.91305092 |
| SCLT1               | 5.834549735 | 7.001240219 | SCARA5   | 6.295105301 | 4.809377397 |
| PHOSPHO2-<br>KLHL23 | 0.890509207 | 1.158321432 | CAMKMT   | 1.503185616 | 2.199219693 |
| SCD                 | 468.1080381 | 384.656876  | SBDS     | 60.72600734 | 67.10061541 |
| SPRY2               | 27.92686554 | 22.65425483 | WNT6     | 0.1         | 0.1         |
| SPRY1               | 9.396878871 | 9.030287176 | WNT3     | 0.332201774 | 0.392906854 |
| TFRC                | 46.64134308 | 63.4881358  | WNT4     | 0.153215136 | 0.109499146 |
| PTPDC1              | 2.837304388 | 2.875698067 | SCARF2   | 2.259705706 | 2.592660369 |
| COMTD1              | 7.55967054  | 8.431920402 | SCARF1   | 0.129501009 | 0.131596394 |
| CAPNS1              | 323.7964181 | 298.076214  | BUD31    | 32.9386336  | 36.82379432 |
| UNC5A               | 0.1         | 0.119130565 | PPDPF    | 311.8745232 | 259.8069035 |
| UNC5B               | 0.115080197 | 0.132302612 | CLCN3    | 6.00468191  | 5.969404836 |
| TFR2                | 0.38108584  | 0.406953635 | CLCN2    | 1.679066169 | 2.208391816 |
| DDIT3               | 37.89477451 | 23.52789443 | FAM132A  | 0.249428409 | 0.171129753 |
| DDIT4               | 223.3540892 | 243.7951214 | KDELC1   | 7.663139392 | 9.796242507 |
| UNC50               | 14.07755975 | 13.48389822 | KDELC2   | 12.95827245 | 11.17404126 |
| SF1                 | 73.75317684 | 76.97781456 | FAM132B  | 3.539422494 | 2.755702428 |
| SET                 | 114.7523214 | 147.1296343 | GALNT7   | 4.695643494 | 4.897179141 |
| FAXDC2              | 5.553149482 | 5.340557283 | GALNT6   | 0.131434819 | 0.167335114 |
| ADAMTS12            | 5.803631619 | 4.733963443 | GALNT4   | 0.754807569 | 0.656928167 |
| ADAMTS10            | 0.245964721 | 0.204221492 | GALNT3   | 0.130425345 | 0.110862128 |
| ADAMTS16            | 1.959132952 | 2.367114298 | GALNT2   | 79.01141488 | 76.41798172 |
| ADAMTS15            | 11.69659407 | 9.216695175 | GALNT1   | 12.18767336 | 12.51949024 |
| ADAMTS14            | 4.674946388 | 2.071221585 | SPATA2L  | 8.664317728 | 7.411183901 |
| ADAMTS13            | 0.603668207 | 0.38470578  | CLCN7    | 34.85301941 | 25.5375044  |
| SFN                 | 0.297533373 | 0.212833966 | CLCN6    | 5.725471726 | 4.819773688 |
| L1CAM               | 0.453685021 | 0.489629444 | CLCN5    | 1.801214155 | 1.641308844 |
| MOV10               | 42.06284205 | 26.83453418 | CLCN4    | 1.002968137 | 1.028856717 |
| HYOU1               | 63.56840423 | 62.27565954 | SBK1     | 0.432954309 | 0.441744771 |
| DZIP1               | 6.265356459 | 6.101619197 | SPATA32  | 0.122745743 | 0.1         |
| DZIP3               | 4.515202356 | 4.323460638 | FAM131C  | 0.649748963 | 0.448916319 |
| SHB                 | 36.08883512 | 35.68477061 | SPATA33  | 5.232615078 | 4.516531501 |
| SHF                 | 0.494829705 | 0.470941662 | FAM131A  | 8.179956325 | 7.014387364 |
| AC137932.6          | 0.83292258  | 0.961939131 | LNX1     | 0.367359418 | 0.636904946 |
| MMP28               | 0.563662513 | 0.446111895 | BUD13    | 9.072546023 | 9.835957486 |
| MMP11               | 3.730385565 | 2.889035051 | LNX2     | 3.982287351 | 3.373923076 |
| MMP14               | 147.8468305 | 143.2762586 | CYFIP2   | 0.145900112 | 0.165547047 |

|            |             |             |          |             |             |
|------------|-------------|-------------|----------|-------------|-------------|
| MMP13      | 4.341700437 | 3.742567991 | ROPN1B   | 0.1         | 0.1         |
| MMP16      | 6.234105    | 5.727070828 | CYFIP1   | 25.83192205 | 25.91132357 |
| MMP15      | 0.989656839 | 0.960905614 | NUB1     | 17.9357316  | 13.0104538  |
| MMP17      | 13.34671265 | 8.048749895 | ROPN1L   | 0.480316815 | 0.453019151 |
| MMP19      | 0.687020079 | 0.98240657  | MPV17    | 35.86973169 | 39.11448539 |
| TRUB1      | 4.500327974 | 5.274918845 | ASF1A    | 8.09250415  | 9.990792017 |
| TRUB2      | 26.96014598 | 33.48217178 | ASF1B    | 43.55779842 | 44.22298565 |
| HSPE1-MOB4 | 5.454174608 | 7.84131582  | FAM149A  | 1.559950632 | 1.037017144 |
| RICTOR     | 3.363841408 | 2.685093753 | RIC8A    | 42.1773758  | 38.34140843 |
| BMP8A      | 0.118468282 | 0.106593346 | PPP3R1   | 14.66223108 | 16.17701324 |
| BMP8B      | 0.113769223 | 0.158988867 | RIC8B    | 2.9840944   | 2.870323803 |
| ARCN1      | 73.18882343 | 70.77842619 | HBQ1     | 0.259115703 | 0.497640372 |
| SKI        | 19.65341562 | 16.55740823 | PPAPDC1A | 13.28421625 | 16.04975981 |
| MTCH1      | 61.32059195 | 61.07339822 | PPAPDC1B | 20.41340071 | 15.89339829 |
| MTCH2      | 54.91769066 | 58.23960064 | TYSND1   | 12.62958655 | 11.7126813  |
| PDCD7      | 4.272866513 | 5.148241486 | HBP1     | 10.33926167 | 8.99451396  |
| PDCD6      | 76.76300017 | 83.84194729 | PRSS27   | 0.775153394 | 0.810421787 |
| PDCD5      | 55.62443281 | 72.82635207 | PRSS22   | 0.129601867 | 0.1         |
| MSI1       | 0.1         | 0.112468627 | PRSS23   | 45.48123521 | 28.89447372 |
| MSI2       | 1.474720845 | 1.716367564 | C11orf96 | 3.816394061 | 4.066394275 |
| SLK        | 23.93718366 | 21.94932743 | C11orf95 | 3.915840838 | 4.020737736 |
| NFATC2IP   | 8.823312177 | 8.184748625 | C11orf94 | 0.240789368 | 0.301052391 |
| MSH6       | 19.92983123 | 21.20116385 | NUF2     | 23.58124585 | 34.07967359 |
| VMAC       | 1.375450513 | 1.077331324 | C11orf91 | 0.272595605 | 0.305394054 |
| MSH2       | 16.92062224 | 20.07467097 | ANXA6    | 64.81337209 | 57.93565682 |
| SMO        | 2.323703669 | 2.035088926 | ANXA7    | 50.23628227 | 45.20542892 |
| MSH3       | 4.410776075 | 4.829568748 | ANXA8    | 0.147727402 | 0.117039121 |
| MSH5       | 0.486511427 | 0.444970324 | ANXA9    | 0.270892358 | 0.161010142 |
| SMS        | 80.64001667 | 92.9866967  | XXYL1    | 7.870734924 | 8.633975753 |
| RAP1B      | 24.08308602 | 26.81262827 | NUDC     | 97.03942085 | 114.860716  |
| SNN        | 6.426286689 | 5.61962995  | ANXA1    | 225.0612837 | 251.062318  |
| NDOR1      | 8.046617311 | 7.62227401  | ANXA2    | 914.6178377 | 907.017706  |
| RAP1A      | 22.42324021 | 22.50051693 | ANXA3    | 1.031141553 | 0.719000301 |
| ZKSCAN7    | 0.514426141 | 0.839769696 | ANXA4    | 15.2347052  | 12.97969646 |
| ZKSCAN8    | 2.947689362 | 3.226635506 | ANXA5    | 583.4878232 | 502.7851075 |
| ZKSCAN3    | 0.539901354 | 0.567316013 | RAB7L1   | 21.18717818 | 20.90178401 |
| ZKSCAN2    | 0.726973031 | 0.703834308 | PRSS16   | 0.136266162 | 0.125894706 |
| ZKSCAN5    | 6.377302519 | 5.704685148 | PRSS12   | 2.951469609 | 2.346902259 |
| ZKSCAN4    | 1.582532422 | 1.516376924 | C11orf86 | 1.941311083 | 1.226911377 |
| ZKSCAN1    | 2.801531894 | 2.590090575 | C11orf84 | 19.82958801 | 19.83282218 |
| NOP14      | 14.03988039 | 15.61339718 | C11orf83 | 11.87562278 | 12.8261524  |
| NOP16      | 51.06548424 | 82.34769103 | C11orf82 | 4.821518581 | 6.769666344 |
| RFXANK     | 44.21161974 | 42.94659945 | C11orf80 | 3.432217077 | 3.916403666 |
| LRCH2      | 1.8496271   | 1.492254157 | CCL13    | 0.1         | 0.1         |
| G6PC3      | 65.53750012 | 62.10503398 | SBSN     | 0.309269998 | 0.305456107 |
| LRCH1      | 5.610689118 | 4.33382617  | C11orf68 | 62.34162607 | 57.47706601 |
| SON        | 13.77005631 | 12.26830361 | C11orf74 | 1.810531227 | 3.484886283 |
| SP2        | 3.268552072 | 3.397087626 | C11orf73 | 16.1377293  | 18.23927563 |
| SP1        | 11.05544323 | 10.62995685 | C11orf71 | 3.702366903 | 3.168214835 |
| SP4        | 0.561409368 | 0.935838942 | C11orf70 | 2.487206085 | 2.563943704 |

|         |             |             |           |             |             |
|---------|-------------|-------------|-----------|-------------|-------------|
| SP3     | 10.51639851 | 10.29666653 | SC5D      | 3.304858659 | 3.952635296 |
| SP6     | 1.178620468 | 0.372966269 | CCL24     | 0.1         | 0.1         |
| LRCH4   | 6.218597757 | 6.890747072 | AOC2      | 0.158481738 | 0.322704187 |
| SP9     | 1.45680311  | 1.298230797 | CCL22     | 0.1         | 0.1         |
| LRCH3   | 4.613082954 | 4.1425456   | CCL20     | 0.593598831 | 0.320274146 |
| NOP10   | 237.0366651 | 263.2259077 | PRSS36    | 0.228094026 | 0.335186682 |
| DYSF    | 0.114088482 | 0.1         | C11orf58  | 16.28582499 | 18.31155797 |
| MSLN    | 2.961084819 | 2.465425089 | C11orf57  | 7.916043522 | 10.04539516 |
| BICD1   | 1.512773342 | 1.603229513 | C11orf65  | 0.143113093 | 0.1         |
| BICD2   | 9.160704323 | 10.27545706 | CCL28     | 0.1         | 0.1         |
| SPR     | 7.969247575 | 7.244249962 | UHRF1BP1L | 6.542584028 | 6.878026977 |
| PRADC1  | 30.32096445 | 36.20087825 | C11orf49  | 14.00575534 | 13.13409047 |
| SPDYE1  | 0.24307705  | 0.222591571 | C11orf48  | 12.65489194 | 18.14125355 |
| MSMB    | 0.1         | 0.1         | C11orf45  | 0.157167843 | 0.14081889  |
| MSL2    | 5.963325553 | 6.008525617 | C11orf54  | 3.540601214 | 3.611340973 |
| MSL3    | 10.12465049 | 11.05772616 | ABHD12    | 38.83710384 | 37.80570448 |
| MSL1    | 15.27189334 | 13.98381648 | ABHD13    | 2.402631099 | 2.968466264 |
| BMP2K   | 7.653059    | 6.495056936 | ABHD10    | 9.857064493 | 11.83899485 |
| GAPDH   | 4032.877876 | 4551.214094 | C11orf52  | 0.1         | 0.1         |
| SRC     | 8.651182716 | 7.666740924 | ABHD11    | 12.81823081 | 13.05351835 |
| SRF     | 23.32046423 | 23.7069404  | KRTAP3-1  | 0.1         | 0.1         |
| SRI     | 27.95681072 | 34.87578079 | C11orf35  | 0.223811432 | 0.161882546 |
| SRM     | 213.4552836 | 261.3909569 | CUL9      | 3.081632934 | 2.548759136 |
| SRR     | 5.993544138 | 5.760716518 | CUL7      | 13.58530386 | 11.51968985 |
| RNMTL1  | 19.22476215 | 23.08561324 | CUL5      | 3.857865972 | 4.2293177   |
| KRIT1   | 4.975955354 | 4.687591494 | CUL3      | 9.962326365 | 10.61092426 |
| NOP56   | 63.58810866 | 79.87021782 | CUL2      | 13.22158892 | 13.90611522 |
| NOP58   | 27.06707507 | 38.55334173 | ERV3-1    | 3.313153077 | 2.360177302 |
| SSB     | 29.71544377 | 44.12453374 | CUL1      | 26.63416733 | 27.79636091 |
| SPDYE3  | 0.979731331 | 1.199252581 | C11orf24  | 46.13277707 | 42.01916029 |
| MSMP    | 5.463701163 | 5.625827114 | C11orf31  | 25.43327339 | 28.36495197 |
| BICC1   | 14.48550734 | 11.13408876 | C11orf30  | 4.6287816   | 4.958388436 |
| NECAP2  | 35.40790438 | 32.11643449 | NACC2     | 8.767331468 | 7.955424957 |
| NECAP1  | 9.496509411 | 9.083855132 | NACC1     | 34.77489592 | 39.78655607 |
| ST5     | 6.2495681   | 4.64597372  | BTN2A2    | 2.199913189 | 1.886928271 |
| ST7     | 6.927677312 | 6.54893403  | BTN2A1    | 11.92193214 | 9.763577503 |
| PDCD4   | 4.244301435 | 4.202626816 | ABHD15    | 3.141426914 | 3.197610905 |
| PDCD2   | 10.92801911 | 13.64475777 | DTX3L     | 52.60969916 | 22.54428571 |
| MT1X    | 101.5593008 | 76.67558067 | NUMB      | 29.52575073 | 26.82123661 |
| RCBTB1  | 5.754998907 | 5.223097089 | REPIN1    | 23.95372936 | 31.44924521 |
| RCBTB2  | 1.506248039 | 1.423569141 | RSBN1L    | 3.133180146 | 3.740297053 |
| MT2A    | 1516.358153 | 1426.144937 | IMPDH1    | 13.65164689 | 19.26861519 |
| STS     | 1.313851715 | 1.135552507 | IMPDH2    | 146.5925237 | 185.286802  |
| TNFSF10 | 0.499011344 | 0.213960572 | MYOZ3     | 0.871754701 | 0.689717002 |
| CYP39A1 | 0.24879662  | 0.251776457 | MYOZ1     | 0.1         | 0.1         |
| MT1F    | 0.1         | 0.1         | SP110     | 16.21598303 | 5.966645946 |
| MTCP1   | 3.257383644 | 3.329750676 | PTOV1     | 83.33235426 | 71.3628066  |
| MT1G    | 0.1         | 0.193672137 | SMIM3     | 59.15173    | 69.6634813  |
| MT1E    | 33.9420779  | 24.0883409  | CUTA      | 161.5865799 | 151.817924  |
| MYCBP2  | 2.873392184 | 2.52888519  | TBCEL     | 3.038794748 | 2.9926151   |



|          |             |             |         |             |             |
|----------|-------------|-------------|---------|-------------|-------------|
| TGFA     | 0.111614415 | 0.116585811 | SMIM4   | 35.38984293 | 43.80337173 |
| STK38L   | 3.20810896  | 3.228774314 | TEX264  | 34.57965399 | 30.24288908 |
| APOBEC3C | 0.514872664 | 0.429140782 | SMIM1   | 1.334673859 | 0.710324489 |
| APOBEC3D | 0.120755604 | 0.203739178 | TEX261  | 23.61462611 | 26.2322727  |
| APOBEC3F | 0.255012335 | 0.186964158 | SMIM7   | 31.36072511 | 31.57383797 |
| APOBEC3G | 0.269960557 | 0.241580787 | SMIM8   | 0.910073256 | 1.65256666  |
| TNFSF15  | 0.138833366 | 0.161001021 | SCAP    | 20.50201735 | 19.59296253 |
| APOBEC3H | 0.1         | 0.1         | SCAI    | 0.372285785 | 0.409852178 |
| TGDS     | 4.497558146 | 4.585624721 | NUS1    | 8.371602196 | 10.03084307 |
| TNFSF12  | 5.279142689 | 4.688263016 | AKR1B10 | 0.360407403 | 0.262693711 |
| TNFSF13  | 0.510862472 | 0.86600431  | AKR1B15 | 0.1         | 0.1         |
| BST2     | 113.8931798 | 53.61170194 | TMCC3   | 3.103834708 | 3.333006808 |
| MSRA     | 16.61612611 | 14.26006812 | TMCC2   | 3.3437111   | 3.222061439 |
| ITGBL1   | 1.988398968 | 1.35411193  | TMCC1   | 2.499141685 | 2.575682133 |
| APOBEC3A | 0.171954677 | 0.151376961 | CUTC    | 19.08803983 | 25.99541571 |
| APOBEC3B | 31.58152805 | 30.36864665 | HCCS    | 22.83694565 | 27.58240386 |
| VMO1     | 0.164616016 | 0.1         | PPCDC   | 2.441202207 | 2.406892714 |
| RAC2     | 0.168764099 | 0.19819766  | TSC22D4 | 25.56331998 | 22.76433317 |
| RAC3     | 16.12647884 | 26.94077873 | BTN3A1  | 3.198978584 | 1.808225739 |
| RAC1     | 223.8067915 | 216.2609166 | TSC22D1 | 42.24263167 | 40.27435285 |
| MST4     | 0.115572925 | 0.1         | LRRIQ3  | 0.897855563 | 0.591999412 |
| MST1     | 0.555855768 | 0.530110984 | TSC22D3 | 1.061636683 | 0.704885037 |
| GAB1     | 1.20116257  | 1.064092636 | TSC22D2 | 10.83507915 | 8.260561709 |
| GAB2     | 0.454846907 | 0.53434379  | BTN3A3  | 2.678527738 | 1.632204066 |
| SYT      | 3.516442382 | 2.935805552 | BTN3A2  | 2.39772355  | 1.605401155 |
| CNKSRL   | 0.487898057 | 0.486464659 | RBM12B  | 5.411531425 | 5.25448967  |
| RAP2C    | 10.98045966 | 11.15602457 | PRIM2   | 8.197759494 | 9.421590982 |
| CNKSRL   | 0.1         | 0.122529102 | SP100   | 23.07094043 | 12.50325556 |
| RAP2A    | 11.86592712 | 13.23361597 | PRIM1   | 13.17665522 | 17.07400627 |
| RAP2B    | 3.378988241 | 4.028551297 | RASIP1  | 0.264119485 | 0.185224965 |
| CNKSRL   | 16.04910641 | 15.31458365 | RBM15B  | 23.14599638 | 20.71655885 |
| TLCD2    | 2.23932559  | 1.596087366 | CUX1    | 2.027663867 | 1.862511365 |
| MICU3    | 1.403016729 | 1.532781939 | SCD5    | 5.038970902 | 5.730471243 |
| TLCD1    | 8.902713924 | 8.637834526 | CADPS2  | 0.142821692 | 0.1         |
| MICU2    | 23.3746021  | 25.31558942 | EPDR1   | 0.119988948 | 0.1         |
| MICU1    | 30.59450207 | 28.04357637 | PRSS56  | 0.124073808 | 0.1         |
| ZFP14    | 0.377332321 | 0.421783104 | PRSS53  | 2.14833891  | 2.028639489 |
| SH3BGR   | 27.76367707 | 30.07035929 | PRSS54  | 0.186107089 | 0.1         |
| MSX1     | 3.982956269 | 3.943261547 | SCG5    | 0.336500502 | 0.240721419 |
| RAE1     | 25.87756717 | 31.73914174 | SCG2    | 15.02690268 | 10.59943739 |
| GAD1     | 0.294294189 | 0.217386602 | USP53   | 3.235194577 | 2.417330775 |
| IGIP     | 1.077140006 | 1.120703284 | USP54   | 3.49937232  | 4.432636131 |
| MRE11A   | 2.735792906 | 3.160053213 | COX7A2  | 85.39931153 | 98.68979975 |
| VMP1     | 36.03137493 | 33.1199448  | USP50   | 0.435891877 | 0.339832971 |
| PDCL3    | 20.63887694 | 23.70224155 | USP51   | 0.317897188 | 0.231016922 |
| CACHD1   | 2.730070336 | 2.660158606 | SMURF2  | 13.05632817 | 11.94006724 |
| TACC3    | 44.86167279 | 49.50677139 | SMURF1  | 12.9368243  | 10.70109174 |
| RAD1     | 7.288645629 | 9.193338195 | ATG16L2 | 0.973130705 | 1.264832286 |
| TACC1    | 19.22653577 | 17.97311012 | ATG16L1 | 8.155880835 | 8.673600229 |
| TACC2    | 6.752103121 | 6.319062865 | USP35   | 1.802891076 | 2.014256012 |

|         |             |             |         |             |             |
|---------|-------------|-------------|---------|-------------|-------------|
| ZFP28   | 3.837136147 | 3.793987187 | USP36   | 8.606489406 | 8.978031744 |
| DENND5B | 2.661329064 | 2.387032501 | PCDHGB7 | 5.823907746 | 4.116912853 |
| TACO1   | 13.57408885 | 16.89211743 | USP37   | 1.67193844  | 1.52139104  |
| TGM1    | 0.212246187 | 0.340437519 | PCDHGB6 | 3.375901353 | 2.6003678   |
| DENND5A | 26.18911427 | 21.01887052 | USP38   | 4.9901202   | 5.712322351 |
| RAG1    | 0.131333701 | 0.133559258 | PCDHGB5 | 3.334188278 | 2.547015768 |
| TGM2    | 43.94465242 | 22.52485161 | USP31   | 1.076089612 | 0.984185116 |
| MSX2    | 0.1         | 0.116559896 | PCDHGB4 | 3.379580394 | 2.56322117  |
| PSPC1   | 17.86053424 | 21.30086319 | USP32   | 7.405417258 | 5.907512495 |
| DENND6B | 2.172334295 | 1.358582438 | PCDHGB3 | 3.344128915 | 2.545503122 |
| DENND6A | 4.695089333 | 4.073806123 | USP33   | 17.14203593 | 14.82964904 |
| RAF1    | 63.34572253 | 61.47810275 | PCDHGB2 | 3.339899281 | 2.558435611 |
| RAI1    | 9.721360223 | 9.356596936 | USP34   | 4.610712112 | 4.580161892 |
| GYLTL1B | 0.120341142 | 0.230715543 | GTDC1   | 2.284808781 | 1.987946809 |
| IL36RN  | 0.254158092 | 0.168794819 | USP39   | 26.30369502 | 30.51786761 |
| DENND4B | 14.40440475 | 13.72860632 | DTWD2   | 0.966899073 | 1.181353859 |
| DENND4A | 1.954139023 | 1.701805023 | GMPPB   | 26.6296213  | 22.58064692 |
| DENND4C | 4.560920967 | 4.131170601 | DTWD1   | 2.051438088 | 2.71118354  |
| TAZ     | 22.65290369 | 22.94758141 | GMPPA   | 39.95380878 | 30.51398717 |
| TBP     | 8.913163058 | 9.120272552 | AOX1    | 1.510918345 | 1.513397495 |
| OR1F1   | 0.376630868 | 0.416031235 | USP30   | 3.093475067 | 3.458765445 |
| RALA    | 16.42490305 | 15.62410656 | PCDHGA8 | 2.799993679 | 2.149177997 |
| GALT    | 12.70881527 | 10.26459358 | USP46   | 1.569174192 | 1.942621804 |
| RALB    | 18.65853637 | 16.58128809 | PCDHGA7 | 3.817034295 | 2.816295425 |
| TROVE2  | 7.031893015 | 7.215581657 | USP47   | 6.309938383 | 6.063139356 |
| MTA1    | 26.52302207 | 32.22654673 | PCDHGA6 | 6.767362583 | 5.295599822 |
| OXCT1   | 16.0591753  | 19.52283069 | USP48   | 9.931764624 | 10.55116709 |
| TDG     | 8.363520012 | 10.96296482 | PCDHGA5 | 3.317321586 | 2.534254277 |
| TGS1    | 14.05873964 | 16.16543112 | CAMK1D  | 3.098418521 | 2.738497176 |
| MVB12B  | 0.356655135 | 0.313799229 | USP49   | 0.754848029 | 1.136244024 |
| MVB12A  | 21.78628326 | 21.33664333 | PCDHGA4 | 3.329286158 | 2.529986189 |
| DROSHA  | 19.03318394 | 20.89790947 | USP42   | 4.804527118 | 4.415784313 |
| SLIT3   | 13.271949   | 8.594236327 | PCDHGA3 | 3.326507104 | 2.540723638 |
| OXCT2   | 0.12848206  | 0.283030425 | USP43   | 0.224732958 | 0.260310922 |
| RALY    | 56.75334101 | 54.77367673 | PCDHGA2 | 3.195290947 | 2.441006128 |
| SLIT2   | 4.890725413 | 3.832115481 | USP44   | 0.1         | 0.117722965 |
| MTA2    | 48.64879842 | 54.28479862 | PCDHGA1 | 3.418921215 | 2.558435611 |
| MTA3    | 5.33519295  | 5.052246007 | USP45   | 0.685549772 | 0.918766035 |
| HSD3B7  | 33.44386645 | 32.36412536 | PCDHGA9 | 4.307997028 | 3.225415087 |
| GALC    | 4.220781177 | 4.217328257 | PCDHGB1 | 3.404961411 | 2.581025929 |
| GALE    | 15.42100811 | 18.95411634 | USP40   | 5.851097504 | 5.592539693 |
| TEC     | 0.645344896 | 0.550868318 | USP41   | 1.594284093 | 0.384519012 |
| TNIP1   | 34.48082127 | 30.89610938 | MCPH1   | 9.432412457 | 11.44794609 |
| TEF     | 2.617202456 | 2.37830411  | USP13   | 4.998469076 | 5.655006859 |
| TNIP2   | 22.15429083 | 19.81214808 | HCN3    | 3.465970707 | 2.704443263 |
| TNIP3   | 0.99059332  | 0.690478564 | USP14   | 19.43797533 | 20.3607693  |
| GALM    | 0.581224072 | 0.413724321 | USP15   | 6.768539676 | 6.665849182 |
| SLIRP   | 47.3466334  | 80.64937433 | CAMK2D  | 22.91715656 | 17.92693068 |
| IPO13   | 25.11453341 | 23.27579391 | USP16   | 7.248003218 | 9.697108168 |
| IPO11   | 10.11892462 | 12.04783999 | USP10   | 23.03277798 | 24.10522468 |

|           |             |             |          |             |             |
|-----------|-------------|-------------|----------|-------------|-------------|
| TES       | 0.305414826 | 0.273337225 | USP11    | 42.26106672 | 30.83516626 |
| CAPN15    | 5.164941852 | 6.514363357 | GMPR2    | 27.27487236 | 26.8024791  |
| MTBP      | 6.141628906 | 7.682254246 | USP12    | 9.341166524 | 10.67715065 |
| TFG       | 101.7220107 | 101.6481877 | USP18    | 31.6690675  | 8.12273258  |
| HOMER3    | 79.16769313 | 71.92898609 | USP19    | 17.31449872 | 17.58237822 |
| GAMT      | 11.70020034 | 16.07838023 | CAMK2G   | 7.937088848 | 7.818379883 |
| MBNL1     | 23.11464284 | 25.02445301 | USP24    | 9.285978432 | 8.963177458 |
| MBNL2     | 10.66838647 | 9.344458725 | USP25    | 6.000902905 | 4.958891527 |
| DNAAF3    | 2.206738583 | 1.140172908 | USP20    | 4.466619166 | 3.956283588 |
| DNAAF2    | 4.009934109 | 5.508261825 | PCDHGC5  | 3.379837137 | 2.561754618 |
| QTRTD1    | 6.52776048  | 8.440427426 | USP21    | 7.691860357 | 9.806884606 |
| GANC      | 2.524241882 | 1.612561944 | B3GAT3   | 63.35329153 | 52.70092912 |
| SF3B14    | 76.84773602 | 107.6778931 | PCDHGC4  | 3.325182023 | 2.563315816 |
| MTAP      | 10.53880799 | 15.2858482  | B3GAT2   | 2.043112697 | 2.470172696 |
| MTDH      | 34.09498586 | 38.45208755 | USP22    | 69.04989404 | 71.01239162 |
| GAR1      | 13.42609709 | 17.60774378 | PCDHGC3  | 24.55801016 | 17.57917314 |
| FAM120AOS | 13.15827758 | 11.71791968 | USP28    | 7.126402693 | 5.889924838 |
| BTF3      | 275.8285949 | 391.088549  | NEURL4   | 8.282801868 | 9.082123138 |
| HOMER1    | 3.08792131  | 3.067877396 | NEURL2   | 2.386713705 | 1.860314626 |
| HOMER2    | 1.029348257 | 1.508190386 | NEURL3   | 0.1         | 0.1         |
| DENND1C   | 0.1         | 0.150779146 | NEURL1   | 0.124079387 | 0.1         |
| CDKN1C    | 0.1         | 0.196098876 | SCLY     | 5.198502845 | 5.795503156 |
| SETD4     | 1.826831178 | 1.782298804 | HCN2     | 5.709762303 | 3.713633559 |
| DENND1B   | 1.563416253 | 1.924158088 | HCN1     | 1.282054084 | 1.055263975 |
| SETD5     | 11.75976063 | 10.73584227 | SCOC     | 14.21437984 | 15.15216913 |
| BTG3      | 20.50244629 | 21.02073738 | SCP2     | 26.92401714 | 22.54707524 |
| BTG2      | 0.157468227 | 0.14103337  | EPSTI1   | 24.85029597 | 11.28271489 |
| SETD2     | 6.001734062 | 5.730325235 | PRKACA   | 32.38186286 | 33.33465756 |
| CDKN1A    | 23.36244928 | 17.03678103 | PRKACB   | 5.89500083  | 6.87231182  |
| RARG      | 24.1099601  | 22.44806049 | ZNF17    | 2.870480015 | 2.269169703 |
| CDKN1B    | 21.99575163 | 22.22122052 | ZNF18    | 3.817510965 | 4.456922301 |
| BTG1      | 16.69554681 | 14.1767605  | PRKAB2   | 3.543127474 | 3.604318884 |
| SETD3     | 16.66756444 | 19.12231998 | ZNF19    | 0.630308332 | 0.492173102 |
| SETD8     | 13.65907556 | 16.59079071 | SECISBP2 | 4.722721717 | 4.756171486 |
| SETD9     | 0.612875557 | 0.961653105 | RC3H1    | 1.229170171 | 1.051305462 |
| DENND1A   | 7.937256337 | 8.607299401 | ZNF10    | 0.760447562 | 0.706306462 |
| SETD6     | 2.928424438 | 3.451356391 | ZNF12    | 5.333093276 | 4.935502602 |
| SETD7     | 4.234171784 | 4.83992768  | BHLHA15  | 0.394341513 | 0.467789183 |
| ADAMTSL1  | 4.875834591 | 5.113364292 | ZNF14    | 1.800733671 | 1.752524447 |
| ADAMTSL5  | 0.772802677 | 0.398622969 | PRKAB1   | 6.591204953 | 6.403381841 |
| ADAMTSL4  | 0.67537178  | 0.527943772 | RC3H2    | 9.940933449 | 9.524576422 |
| MTG1      | 10.88294782 | 10.69504994 | ZNF16    | 7.626580265 | 6.268181302 |
| RARS      | 68.21929121 | 73.75098695 | SIGIRR   | 20.47755047 | 19.12965324 |
| ADAMTSL3  | 0.1         | 0.1         | LARS2    | 8.999576356 | 9.022722342 |
| MTG2      | 14.32974571 | 17.33622297 | SCO1     | 18.8782837  | 26.23933261 |
| GAST      | 0.1         | 0.1         | SCO2     | 50.02463344 | 47.2177087  |
| TK2       | 5.018260581 | 4.102879236 | ZNF28    | 2.724024601 | 2.579767051 |
| TK1       | 77.37128036 | 68.06881771 | UNC119B  | 4.971906764 | 4.892593223 |
| DENND2D   | 0.115761917 | 0.111254298 | AASDH    | 1.656808522 | 2.0349898   |
| DENND2C   | 0.146035691 | 0.157523076 | NPRL2    | 21.42375131 | 22.48133584 |

|         |             |             |         |             |             |
|---------|-------------|-------------|---------|-------------|-------------|
| DENND2A | 14.58476877 | 10.76813561 | NPRL3   | 13.69129367 | 13.16414068 |
| COPZ2   | 3.593966809 | 2.676551785 | ZNF20   | 1.220151676 | 1.142175201 |
| COPZ1   | 88.3400155  | 95.84702101 | ZNF22   | 3.588561249 | 3.31460333  |
| MTF1    | 3.879696519 | 3.338527303 | ZNF23   | 1.654371951 | 1.839146594 |
| MTF2    | 5.738123083 | 6.23743108  | ZNF24   | 5.426014293 | 5.88953473  |
| RARA    | 10.26015771 | 9.754938277 | ZNF25   | 1.18988693  | 1.534804942 |
| GAS1    | 106.7213619 | 98.47561751 | ZNF26   | 2.05443318  | 2.097311087 |
| RARB    | 5.615142117 | 5.593631426 | LARP1   | 70.09046185 | 66.80762863 |
| GARS    | 188.4658846 | 174.1323389 | PRPF38B | 12.82501992 | 17.92613683 |
| TKT     | 423.3295671 | 391.7784884 | PRPF38A | 12.67550752 | 15.23474096 |
| GAS6    | 103.1736544 | 77.8690217  | ZNF32   | 14.54869876 | 14.78906118 |
| GART    | 27.36834967 | 35.87848087 | LARP7   | 9.82527905  | 13.03844516 |
| GAS8    | 3.994775299 | 3.677097645 | ZNF34   | 3.598834239 | 3.056023115 |
| OLFML3  | 0.464485105 | 0.446998748 | ZNF35   | 3.71350834  | 3.652718756 |
| NDNL2   | 7.481566333 | 5.793109437 | LARP4   | 7.988428746 | 9.788774747 |
| MBNL3   | 0.104311667 | 0.1         | LARP6   | 34.4245255  | 28.6221993  |
| CDKN2D  | 13.72839074 | 13.86116672 | PPFIBP1 | 26.75326384 | 25.47253138 |
| CDKN2B  | 18.06909128 | 13.54477308 | PPFIBP2 | 0.1         | 0.1         |
| CDKN2C  | 114.5819946 | 115.2572126 | LAS1L   | 31.99286888 | 38.97010309 |
| CDKN2A  | 423.2290085 | 436.8448208 | FXYD3   | 0.198704136 | 0.193968755 |
| IL10RB  | 17.00204728 | 15.00576387 | ZNF30   | 1.211570115 | 1.31140858  |
| GATC    | 4.451188408 | 5.724725152 | FXYD1   | 4.033647604 | 5.184709463 |
| GATM    | 0.1         | 0.1         | SFXN3   | 3.445729488 | 2.777022349 |
| OSTM1   | 17.27753215 | 14.52412506 | SFXN4   | 6.194660473 | 9.129194778 |
| GATS    | 1.943060824 | 1.78152909  | FXYD7   | 19.2629535  | 13.73067537 |
| TNC     | 9.958660933 | 8.886141453 | SFXN1   | 14.91931098 | 19.4514795  |
| TNF     | 0.1         | 0.1         | FXYD6   | 0.1         | 0.1         |
| LARP4B  | 9.303631329 | 10.10058026 | SFXN2   | 1.215269412 | 1.374116559 |
| TOX     | 0.452126787 | 0.225712497 | FXYD5   | 482.2758545 | 437.736459  |
| INSIG2  | 1.890036257 | 1.923832406 | SFXN5   | 3.543360057 | 4.189747193 |
| INSIG1  | 34.98588657 | 31.47907662 | PRKAG1  | 38.31023461 | 41.77816069 |
| MTM1    | 6.062305463 | 5.260237135 | ZNF43   | 1.252272302 | 1.379109178 |
| TPR     | 18.82450743 | 19.74752807 | PRKAG2  | 4.473769842 | 4.764804452 |
| SYNJ2   | 15.02836667 | 13.8932822  | ZNF44   | 1.846573689 | 1.930827944 |
| COPRS   | 49.91356893 | 46.21035585 | ZNF45   | 4.425945431 | 4.405318288 |
| COPS4   | 24.61933839 | 23.12469697 | ZNF48   | 7.363846212 | 6.619244175 |
| COPS3   | 57.12649566 | 66.84162373 | ZNF41   | 2.76798491  | 2.855286313 |
| COPS6   | 80.10350928 | 83.7309567  | APC2    | 1.128687486 | 0.801613625 |
| COPS5   | 73.91265326 | 89.8230704  | ZNF57   | 1.344963203 | 1.988969021 |
| MTL5    | 2.650986842 | 2.770779965 | TOMM40L | 9.344507548 | 10.07757888 |
| SYNJ1   | 1.914891772 | 1.934068506 | PTRH2   | 5.323017597 | 6.816415642 |
| COPS2   | 13.79601581 | 17.43709811 | RAPGEF1 | 11.44093778 | 10.08563167 |
| COPS8   | 70.76983868 | 77.4979438  | PTRH1   | 12.90454804 | 15.105166   |
| BMPR2   | 3.035440837 | 2.226691217 | RAPGEF2 | 2.402549672 | 1.995809878 |
| SYNE4   | 0.1         | 0.1         | RAPGEF5 | 0.343509721 | 0.252136612 |
| MTO1    | 13.19021992 | 13.77268543 | RAPGEF6 | 3.484488394 | 3.481451254 |
| SYNE3   | 2.220776205 | 2.321670858 | HCST    | 0.407404006 | 0.319492108 |
| SYNE2   | 2.172738797 | 1.446200224 | CRYAB   | 0.250365491 | 0.422091168 |
| TRO     | 3.728537297 | 3.484105802 | RAPGEF3 | 0.500974641 | 0.267010235 |
| SERAC1  | 4.419456136 | 3.698199541 | RAPGEF4 | 0.135836705 | 0.159705487 |

|           |             |             |          |             |             |
|-----------|-------------|-------------|----------|-------------|-------------|
| SECISBP2L | 3.299897495 | 2.519184751 | SZRD1    | 47.36103954 | 51.61420316 |
| LANCL1    | 2.705425045 | 3.748475056 | CCM2L    | 0.1         | 0.1         |
| TSN       | 16.39574973 | 18.58177646 | ZNF69    | 0.554437342 | 0.865764802 |
| TST       | 17.23432618 | 15.59668332 | PLAGL1   | 7.736584569 | 6.376083882 |
| ESPL1     | 16.29868594 | 18.26823008 | PLAGL2   | 5.96937056  | 6.204181422 |
| PPAP2B    | 58.27035366 | 42.48692507 | EGLN1    | 14.91603277 | 15.33594398 |
| PPAP2A    | 22.89814678 | 18.5351698  | EGLN3    | 0.1         | 0.1         |
| LANCL2    | 4.277107039 | 4.718662547 | EGLN2    | 39.99487818 | 37.55767248 |
| LANCL3    | 0.1         | 0.111132703 | MCRS1    | 32.0070835  | 35.22262585 |
| MTPN      | 24.81832128 | 26.68860933 | ZNF76    | 10.56447151 | 9.91670612  |
| PPAP2C    | 25.07874577 | 23.54909998 | ZNF77    | 1.398781924 | 1.42738928  |
| TTK       | 26.84139928 | 36.0146233  | ZNF79    | 2.617792214 | 2.307138486 |
| TENC1     | 1.180569776 | 0.631842851 | TARBP2   | 9.857257675 | 11.08716467 |
| TTL       | 10.81419636 | 11.72245563 | TARBP1   | 5.153350333 | 6.181129387 |
| TUB       | 0.877447013 | 0.753412436 | ZNF70    | 0.694911312 | 0.86644655  |
| MTOR      | 17.62480248 | 16.71906782 | ZNF71    | 7.611627344 | 7.784045275 |
| GLOD4     | 32.37742061 | 37.45356594 | ZNF74    | 3.559132056 | 4.121595244 |
| TCERG1    | 18.76820612 | 25.66644069 | IL1RAP   | 8.72004818  | 8.234027951 |
| C12orf57  | 37.60442095 | 28.5866801  | APEH     | 49.64019523 | 54.16763888 |
| MTRR      | 17.14946453 | 19.58005757 | MAP3K8   | 1.186269648 | 0.924861976 |
| WDSUB1    | 5.650810714 | 5.333201867 | MAP3K9   | 0.146339557 | 0.139704754 |
| PITPNB    | 28.12634679 | 29.18462962 | MAP3K6   | 12.30808458 | 9.722545795 |
| ZMYND8    | 18.41699661 | 17.84388931 | SCXB     | 1.101953269 | 0.511362499 |
| PITPNA    | 33.44527171 | 34.89169939 | MAP3K7   | 10.23487269 | 11.33521774 |
| MKI67     | 19.28501586 | 21.80678061 | MAP3K4   | 2.213051402 | 2.479450186 |
| GBA2      | 15.14341959 | 16.85516837 | MAP3K5   | 5.528029122 | 4.192915316 |
| KIAA0930  | 5.545505253 | 5.764132261 | FBXW4    | 4.258262294 | 3.518935621 |
| C12orf61  | 0.840398247 | 0.738795023 | FBXW5    | 41.96256608 | 38.74917063 |
| C12orf60  | 0.460272378 | 0.768826852 | FBXW8    | 4.198319069 | 3.866719655 |
| SYNPO     | 16.60375922 | 12.25685758 | FBXW7    | 2.000494399 | 2.292057402 |
| BTRC      | 5.26780184  | 4.725293616 | FBXW9    | 7.128526246 | 7.937397229 |
| C12orf66  | 2.234193836 | 2.076891165 | SRCIN1   | 0.18105873  | 0.131569503 |
| C12orf65  | 6.920795576 | 8.97411033  | FBXW2    | 7.864979674 | 8.454869346 |
| C12orf45  | 7.36649694  | 11.60992616 | TSNAXIP1 | 0.255078439 | 0.196887747 |
| C12orf49  | 6.971634442 | 6.680356119 | API5     | 18.79678327 | 21.68267442 |
| KIAA0922  | 2.515402262 | 2.543242251 | APIP     | 10.66911738 | 11.36176563 |
| UHRF1BP1  | 4.074679864 | 3.003457002 | UNC45A   | 19.41621693 | 16.78403276 |
| TXN       | 200.7453399 | 234.6480077 | CERS4    | 0.177308448 | 0.1         |
| C12orf68  | 2.449332491 | 1.571739528 | CERS5    | 8.938591546 | 6.871713836 |
| SYNRG     | 3.601782987 | 3.199194416 | CERS6    | 2.890551734 | 3.061685724 |
| GBAS      | 35.84890766 | 41.65509135 | RNASSET2 | 3.882052964 | 4.017143948 |
| ZZZ3      | 9.564054969 | 10.41227053 | CES4A    | 0.476610143 | 0.219514027 |
| VNN1      | 0.248663904 | 0.30264763  | CERS1    | 7.187957648 | 6.582053276 |
| VNN2      | 0.615097647 | 0.607899348 | CERS2    | 107.3720354 | 115.4214466 |
| C12orf73  | 2.553425123 | 4.085323639 | PRKAA1   | 13.11313663 | 13.9831967  |
| RBAK      | 2.772505013 | 3.112379241 | PRKAA2   | 0.433305883 | 0.528375743 |
| C12orf76  | 2.082485129 | 1.914783081 | UHRF2    | 17.87757907 | 17.07782948 |
| KIAA0947  | 9.394755392 | 9.588228464 | UHRF1    | 14.01757457 | 16.03269721 |
| C12orf75  | 23.983896   | 25.272981   | MLLT1    | 37.84395772 | 41.48407973 |
| TENM2     | 2.177040354 | 1.673254519 | MLLT3    | 0.583303374 | 0.477952963 |

|           |             |             |            |             |             |
|-----------|-------------|-------------|------------|-------------|-------------|
| GBE1      | 13.07524633 | 11.11214356 | MLLT4      | 3.80414337  | 3.815124876 |
| SEC61G    | 83.93553709 | 88.69615226 | MALT1      | 22.93583964 | 23.43318922 |
| SEC61B    | 145.9703115 | 149.5327264 | MLLT6      | 8.405625603 | 8.320313834 |
| SCNM1     | 9.917171764 | 9.902822812 | SORL1      | 0.123672322 | 0.103380495 |
| C12orf10  | 36.14520699 | 44.06345621 | APLN       | 9.99394667  | 6.474121607 |
| AVPI1     | 3.272312172 | 2.524977817 | CDKN2AIPNL | 26.48992299 | 35.74471311 |
| C12orf39  | 0.812882017 | 0.354505428 | APLF       | 1.017819391 | 0.967361641 |
| RBFA      | 2.688873285 | 3.908046994 | PEG10      | 14.68529354 | 10.49735241 |
| C12orf44  | 43.33850192 | 38.38159251 | FBXO4      | 8.053257307 | 8.028851233 |
| C12orf43  | 4.040748574 | 4.247994366 | FBXO3      | 2.73208297  | 3.28874269  |
| C12orf23  | 15.5659096  | 13.23341592 | FBXO6      | 16.01028792 | 7.753212879 |
| MTX1      | 18.21291458 | 20.64725871 | FBXO5      | 18.01661882 | 21.53657539 |
| MTX2      | 9.987711635 | 11.21426964 | FBXO8      | 5.3478084   | 5.163556225 |
| C12orf29  | 4.908294946 | 5.740275093 | FBXO7      | 58.59042981 | 59.54025699 |
| MTX3      | 1.672692542 | 2.102560939 | FBXO9      | 10.12899012 | 10.94023201 |
| GBF1      | 27.77980563 | 21.63946306 | FBXO2      | 1.644906779 | 1.419384336 |
| NR6A1     | 0.820728361 | 0.835161844 | BCS1L      | 10.14913787 | 13.36437353 |
| COPG2     | 10.17960527 | 11.43826135 | FLYWCH2    | 16.38907096 | 18.49200714 |
| COPG1     | 128.8796781 | 105.8678486 | FLYWCH1    | 8.248607747 | 7.567876003 |
| FRA10AC1  | 2.790904602 | 3.066092277 | CERKL      | 0.968486393 | 1.283856367 |
| GOLGA6L9  | 0.284309636 | 0.397531489 | AARS2      | 4.315201896 | 4.816280434 |
| BMPER     | 2.258182645 | 1.552504619 | SDC4       | 45.86802128 | 36.61212989 |
| HIST1H2AE | 1.665907285 | 1.152316771 | SDC2       | 7.985860981 | 7.742356187 |
| HIST1H2AD | 0.813056743 | 0.681869273 | SDC3       | 6.947707861 | 6.032458914 |
| HIST1H2AG | 2.290716499 | 2.260102046 | CWF19L2    | 2.285754946 | 2.633260129 |
| HIST1H2AC | 20.08126038 | 15.65780962 | APOO       | 13.58248375 | 18.07210708 |
| HIST1H2AM | 0.953409067 | 2.080386695 | APOM       | 1.055739655 | 1.074879532 |
| HIST1H2AL | 0.321069264 | 0.573542547 | APOE       | 1.527925155 | 1.239513593 |
| HIST1H2AI | 0.543081254 | 0.811828349 | CYP26A1    | 0.123140881 | 0.166092056 |
| IL11RA    | 16.83205542 | 14.42803941 | FBXL8      | 1.00971592  | 0.888743996 |
| HIST1H2AK | 0.438812676 | 0.422557967 | CWF19L1    | 10.02460779 | 10.25757456 |
| HIST1H2AJ | 0.218340039 | 1.282957463 | SDC1       | 43.2796675  | 42.92782259 |
| CDPF1     | 6.889878693 | 6.613854918 | FBXL3      | 8.560929302 | 9.120080419 |
| RSBN1     | 2.786999158 | 3.216967702 | FBXL2      | 2.518618746 | 2.293678276 |
| HIST1H2BF | 0.220816923 | 0.1         | FBXL5      | 10.55013338 | 9.017258389 |
| HIST1H2BH | 2.05581278  | 1.671047038 | FBXL4      | 2.845501041 | 2.545664625 |
| HIST1H2BG | 2.084655525 | 1.183649798 | FBXL7      | 8.836277801 | 6.873929185 |
| HIST1H2BD | 6.937169138 | 4.421650428 | FBXL6      | 15.05873345 | 16.6573182  |
| HIST1H2BC | 1.997763542 | 3.233525453 | MRPS17     | 24.74582764 | 40.92890304 |
| ZCCHC8    | 5.032624183 | 5.02554733  | MRPS15     | 87.90573342 | 103.2333138 |
| ZCCHC7    | 11.3123738  | 12.32495833 | MRPS16     | 45.26644809 | 52.88243539 |
| COPB2     | 94.44624473 | 79.97641342 | MRPS14     | 9.552020442 | 9.435724433 |
| ZCCHC6    | 6.087232668 | 5.918574506 | MRPS11     | 16.30117433 | 19.41478925 |
| ZCCHC5    | 0.217714374 | 0.156033484 | MRPS12     | 70.17157395 | 88.0868116  |
| COPB1     | 47.37715062 | 43.42258491 | MRPS10     | 21.63307602 | 25.63257326 |
| ZCCHC9    | 10.19438548 | 13.87309911 | SDF4       | 201.465871  | 196.3971918 |
| ALOX15    | 0.1         | 0.1         | SDF2       | 20.54855375 | 17.35530542 |
| ALOX12    | 0.628766178 | 0.980947119 | MRPS28     | 34.04835921 | 39.03051103 |
| ZMAT2     | 69.43708792 | 73.57687017 | MRPS26     | 24.85060838 | 34.44512787 |
| UBB       | 1052.577209 | 1100.490009 | MRPS27     | 35.8935649  | 48.78362936 |

|           |             |             |          |             |             |
|-----------|-------------|-------------|----------|-------------|-------------|
| ZMAT3     | 1.605007914 | 1.854371296 | MRPS24   | 163.2688096 | 164.7320105 |
| ZMAT5     | 17.04828687 | 17.73139941 | MRPS25   | 6.551242673 | 8.833295803 |
| UBC       | 269.8887716 | 199.3232346 | MRPS22   | 31.04969692 | 41.41355169 |
| LOC646021 | 5.193262449 | 5.848305321 | MRPS23   | 21.75797204 | 24.41507676 |
| ZCCHC4    | 3.183272069 | 3.7338225   | MRPS21   | 59.60782635 | 76.50434747 |
| ZCCHC3    | 5.97488163  | 6.755169357 | PRPF40B  | 1.047967275 | 1.339332203 |
| ZCCHC2    | 3.854876822 | 2.202044707 | PRPF40A  | 12.0802626  | 14.19262955 |
| GLP1R     | 0.1         | 0.1         | APRT     | 45.35619295 | 62.84292048 |
| UCN       | 1.029209832 | 0.522210021 | SDE2     | 6.255364571 | 6.484378813 |
| THRB      | 0.501352015 | 0.474001675 | C14orf2  | 26.10384222 | 39.6510002  |
| THRA      | 6.663130135 | 5.987033084 | C14orf1  | 17.8443972  | 18.64708309 |
| RBM3      | 65.81273888 | 70.92374417 | DYNC1I2  | 19.81417964 | 19.04205948 |
| RBM4      | 28.91698665 | 33.18463494 | SELPLG   | 1.30129943  | 1.028057228 |
| RBM7      | 8.78625351  | 8.33985078  | MRPS35   | 23.07686947 | 28.41436617 |
| RBM5      | 14.64924574 | 12.65375881 | MRPS36   | 13.82076615 | 17.99116668 |
| RBM6      | 9.878911522 | 12.34449664 | MRPS33   | 25.23996111 | 28.69134792 |
| RBL2      | 5.639626546 | 5.991337076 | MRPS34   | 58.69729619 | 81.74058375 |
| RBL1      | 5.935272629 | 6.287794639 | PRICKLE2 | 6.891995836 | 6.349221458 |
| RBKS      | 1.056425183 | 0.953631439 | MRPS31   | 10.34282085 | 15.17037072 |
| HIST1H2BN | 0.678522015 | 0.843535625 | PRICKLE3 | 10.88649395 | 11.21253199 |
| HIST1H2BO | 0.322489409 | 0.656015339 | MRPS30   | 36.83919647 | 46.36775338 |
| HIST1H2BJ | 3.988245262 | 1.950852366 | PRICKLE1 | 0.773286626 | 0.838277781 |
| HIST1H2BL | 1.93492369  | 1.410169225 | PRICKLE4 | 2.498722388 | 2.398666434 |
| HIST1H2BK | 83.1353545  | 55.67493073 | DYNC1I1  | 0.117055574 | 0.136533979 |
| MUC1      | 44.75887792 | 41.23052811 | MAP3K2   | 1.930481976 | 1.796025813 |
| POC1A     | 18.52471402 | 19.70247511 | MAP3K3   | 6.642529794 | 6.751171282 |
| POC1B     | 3.949430835 | 4.497702936 | DYNC1H1  | 86.22174032 | 64.74576756 |
| BUB3      | 43.17971303 | 49.36652823 | MAP3K1   | 1.420912394 | 1.117225537 |
| GBP2      | 15.49809201 | 10.71756559 | SORT1    | 2.568256671 | 2.588376202 |
| GBP1      | 78.91264215 | 23.71864613 | APTX     | 13.0578796  | 14.79058955 |
| BUB1      | 25.20406866 | 29.66515225 | HDGF     | 255.8952904 | 306.2395365 |
| GBP4      | 6.787300258 | 2.568920092 | MAMLD1   | 13.70178888 | 12.53965977 |
| GBP3      | 4.242348905 | 1.245675476 | NCMAP    | 0.1         | 0.118588908 |
| CAPN12    | 11.88824118 | 12.09721833 | ZNF81    | 1.111393991 | 0.883513371 |
| CAPN10    | 4.462020987 | 5.543470679 | ZNF83    | 4.346934554 | 4.283459515 |
| KIAA0907  | 10.5255364  | 11.32271717 | ZNF84    | 2.886326652 | 2.640978731 |
| FSIP1     | 0.118468282 | 0.245053618 | ZNF85    | 2.46044629  | 2.720034042 |
| RBMX      | 99.26632511 | 124.453943  | IGFLR1   | 7.91875406  | 6.582174524 |
| RBPJ      | 9.106737323 | 9.700042005 | DNAJB12  | 21.47628232 | 18.57051256 |
| ZFYVE28   | 3.144977159 | 2.690677224 | SDHC     | 30.49644906 | 30.86822865 |
| ZFYVE26   | 7.053685135 | 4.240744131 | DNAJB14  | 1.765105031 | 1.7327774   |
| ZFYVE27   | 4.935844858 | 4.489050799 | SDHD     | 32.97408674 | 43.73733385 |
| UBASH3B   | 34.37294152 | 28.19333634 | SDHA     | 131.9127797 | 126.4995353 |
| GBP5      | 3.228359226 | 1.537261621 | SDHB     | 77.0581796  | 93.65579812 |
| GBP7      | 1.687752964 | 1.082526814 | ZNF91    | 1.467138868 | 1.536745873 |
| ZFYVE20   | 5.008843332 | 5.271408911 | ZNF92    | 1.763311381 | 2.131188633 |
| ZFYVE21   | 14.68220979 | 14.45029786 | ZNF93    | 4.43237206  | 3.631513315 |
| RBP7      | 0.1         | 0.156632315 | DNAJB11  | 47.34521103 | 46.5720282  |
| RBP4      | 6.061621948 | 5.966386936 | RNASEH1  | 8.622677393 | 8.848790501 |
| ZFYVE16   | 6.128308555 | 5.654126499 | LPXN     | 3.03125593  | 2.211657823 |

|            |             |             |         |             |             |
|------------|-------------|-------------|---------|-------------|-------------|
| RBP5       | 0.37633658  | 0.336771273 | FGF21   | 0.1         | 0.156545985 |
| NGFRAP1    | 0.148462012 | 0.1         | IFT20   | 12.30738526 | 14.90439816 |
| ZFYVE19    | 7.82526688  | 7.13369363  | FGF18   | 0.938769356 | 0.886051957 |
| RBP1       | 0.414432746 | 0.374402036 | IFT27   | 0.1         | 0.1         |
| CEP85L     | 0.623661255 | 0.687563046 | FGF12   | 5.325419987 | 3.380436464 |
| THY1       | 365.0376728 | 298.9115372 | FGF11   | 0.253079269 | 0.318602821 |
| EDEM3      | 9.899615123 | 10.3355736  | MYSM1   | 3.291907648 | 3.830694342 |
| EDEM1      | 7.386519101 | 6.430062487 | IFT52   | 19.73293034 | 20.56269227 |
| EDEM2      | 34.60404211 | 31.46190658 | CYP26B1 | 0.47629327  | 0.621076961 |
| PTRHD1     | 18.80972562 | 25.52117682 | LASP1   | 63.79160996 | 50.75230497 |
| COL1A1     | 54.72465971 | 32.51906205 | EEF2K   | 1.761151193 | 1.941696324 |
| COL1A2     | 171.3539138 | 141.785867  | GGACT   | 6.598759442 | 7.676739693 |
| HIST2H2AA3 | 1.364731462 | 0.447323653 | IFT57   | 10.43186495 | 13.24451408 |
| HIST2H2AA4 | 0.683722213 | 0.655717845 | QRFP    | 0.520568497 | 0.653172482 |
| TUBA1C     | 723.269804  | 745.4228341 | EEF1G   | 413.4470587 | 532.7558257 |
| TUBA1B     | 1353.441138 | 1468.207957 | IFT43   | 8.867722787 | 8.267192746 |
| TUBA1A     | 310.401872  | 287.7895287 | EEF1D   | 173.5376557 | 201.5101882 |
| HEXDC      | 2.456321418 | 2.183041729 | IFT46   | 8.162838187 | 7.736452343 |
| RILPL2     | 5.385635149 | 5.295768224 | POMZP3  | 6.794752188 | 5.549400701 |
| RILPL1     | 6.831491681 | 6.74415324  | PSMB10  | 24.52639564 | 16.61907201 |
| ADSSL1     | 1.93492369  | 0.816498795 | IFT74   | 10.98799218 | 13.05134867 |
| MIEF2      | 5.95027878  | 4.935259609 | NWD1    | 0.113590916 | 0.129112491 |
| MIEF1      | 16.490801   | 20.08479104 | WARS2   | 4.730123158 | 6.573273    |
| UNG        | 17.36872056 | 22.77441349 | MSANTD3 | 16.24664489 | 17.21582867 |
| UNK        | 4.874968103 | 4.636938001 | MSANTD4 | 0.977082973 | 1.161907865 |
| GBX2       | 0.372403699 | 0.71128963  | ZSCAN31 | 0.227566058 | 0.145542254 |
| ASPRV1     | 0.267045907 | 0.134078242 | ZSCAN30 | 1.90502596  | 1.533920828 |
| SERBP1     | 57.84241577 | 80.79790882 | MSANTD2 | 2.077384245 | 1.877202532 |
| MUM1       | 10.73942219 | 10.74789374 | ZSCAN32 | 3.318084436 | 3.695077753 |
| SMCHD1     | 4.778730087 | 4.189255404 | PRKCI   | 5.620620956 | 5.743113323 |
| AREL1      | 13.55294776 | 12.78491045 | PRKCH   | 0.3222673   | 0.226962349 |
| PPP1R16A   | 37.29280002 | 40.50568689 | PRKCE   | 4.649611655 | 3.986489506 |
| MUL1       | 21.59489369 | 18.23962072 | PRKCD   | 1.813455922 | 2.067592629 |
| TUBA4A     | 2.116516153 | 3.024189971 | AFAP1   | 18.72088885 | 16.03569198 |
| RBX1       | 45.3996786  | 50.377744   | PRKCA   | 7.712017208 | 7.078948026 |
| RBMXL1     | 3.950133953 | 4.052238661 | ZSCAN20 | 1.626917884 | 1.41344768  |
| TUBGCP2    | 16.57874021 | 17.35102186 | DAAM1   | 1.612895035 | 1.564725219 |
| TIA1       | 6.005531206 | 6.73209185  | PRKD3   | 8.670001097 | 9.228958247 |
| GAREM      | 0.1         | 0.1         | SDPR    | 0.131960183 | 0.134230236 |
| UST        | 10.0382994  | 10.14440072 | DAAM2   | 0.1         | 0.1         |
| TUBGCP5    | 2.981532279 | 2.977038895 | ZSCAN22 | 2.684696313 | 3.167878486 |
| TUBGCP6    | 4.458954679 | 4.611125335 | ZSCAN21 | 2.106494178 | 2.11955209  |
| FGFR1OP    | 4.688844058 | 4.895632297 | PRKD2   | 16.93619557 | 8.701396489 |
| TUBGCP3    | 10.72368467 | 11.20836276 | ZSCAN26 | 4.6947042   | 4.360993014 |
| TUBGCP4    | 3.637681208 | 4.426487337 | ZSCAN25 | 3.456704721 | 3.622623737 |
| MOXD1      | 3.433497535 | 3.273571308 | FREM2   | 0.199640511 | 0.178030171 |
| PPP1R13B   | 0.665712635 | 0.668492968 | ZSCAN29 | 2.074060397 | 2.025498702 |
| PPP1R13L   | 18.77623623 | 14.33712688 | LIMS3L  | 0.262856668 | 0.172676658 |
| PPP1R12A   | 10.70525112 | 10.94896322 | PRKDC   | 40.05660432 | 43.67445577 |
| PPP1R12B   | 0.946606586 | 0.763627807 | PRDM15  | 1.622296826 | 1.468340504 |



|              |             |             |          |             |             |
|--------------|-------------|-------------|----------|-------------|-------------|
| PPP1R12C     | 21.61641421 | 23.4199075  | PRDM13   | 0.164858024 | 0.192619641 |
| PPP1R15A     | 42.98214931 | 31.32572276 | SDSL     | 7.265693376 | 4.704793042 |
| PPP1R15B     | 12.24330322 | 10.87313035 | PRDM11   | 0.182201388 | 0.175956036 |
| KATNB1       | 8.622262645 | 9.571403046 | PRKCZ    | 0.1         | 0.147571871 |
| FURIN        | 7.367671151 | 6.340779283 | PRDM10   | 2.187254722 | 2.282700066 |
| MIEN1        | 72.78213302 | 65.20314231 | ZSCAN12  | 0.255506931 | 0.236658222 |
| KATNA1       | 6.711505571 | 9.336223469 | ZSCAN16  | 1.891423344 | 3.995468862 |
| TIFA         | 2.466800773 | 2.236566031 | ZSCAN18  | 14.34270243 | 12.23254052 |
| PPP1R14B     | 172.3761191 | 219.6583777 | MEX3D    | 33.73161615 | 29.12455809 |
| PPP1R14C     | 0.1         | 0.133554198 | MEX3C    | 10.67337675 | 11.5990124  |
| CDR2L        | 8.327577802 | 8.838529531 | MEX3B    | 2.116239361 | 2.317243361 |
| MURC         | 0.720463928 | 0.710652832 | MEX3A    | 3.518740141 | 5.254659604 |
| GCC2         | 1.246695808 | 1.322826175 | ASH2L    | 33.5697308  | 33.99905548 |
| GCC1         | 7.731758258 | 6.114784931 | ASGR1    | 0.272710362 | 0.223318372 |
| UXT          | 11.53329262 | 42.39785229 | ZSCAN5A  | 2.687515246 | 3.077578136 |
| DHX57        | 3.886097204 | 4.477572406 | ASH1L    | 4.988909027 | 4.58633367  |
| DHX58        | 10.78008675 | 3.21834794  | ANGPTL6  | 6.868391133 | 3.844463318 |
| RCC1         | 36.20050247 | 53.54778737 | ANGPTL4  | 33.336075   | 36.7392556  |
| GCAT         | 9.328925553 | 10.4951794  | PAPSS2   | 8.570024162 | 6.609266589 |
| DHX40        | 9.237871189 | 9.355839119 | PAPSS1   | 19.45399658 | 20.67544229 |
| MXRA8        | 0.651661308 | 0.493896309 | ERMP1    | 4.642453913 | 3.86428348  |
| MXRA7        | 6.210607856 | 6.144857704 | GTF2B    | 18.41716757 | 18.2524643  |
| PEX11G       | 0.497248507 | 0.982444055 | GTF2I    | 16.32215033 | 15.57677611 |
| MMADHC       | 31.37199345 | 35.02582243 | MAP2K3   | 41.84503352 | 43.33578677 |
| GCDH         | 6.051746481 | 7.446571872 | MAP2K4   | 10.18710568 | 10.81736947 |
| PAXIP1       | 5.604056351 | 7.391686262 | MAP2K1   | 10.02418052 | 9.524155907 |
| PEX11A       | 0.990485054 | 1.114610672 | MAP2K2   | 145.0482572 | 137.8874996 |
| PEX11B       | 12.47056375 | 12.65858345 | RALGAPA1 | 1.313046729 | 1.468011802 |
| PTTG1IP      | 156.2663475 | 130.8877819 | RALGAPA2 | 1.052691258 | 1.022358048 |
| DHX30        | 37.57408682 | 44.15157538 | GTF3A    | 70.18242065 | 88.44963795 |
| DHX32        | 10.05027715 | 10.06830199 | MAP2K7   | 15.734336   | 16.85572759 |
| DHX33        | 11.94577889 | 16.13804372 | MAP2K5   | 3.282482113 | 2.905177755 |
| MIER3        | 4.770226205 | 4.588921377 | MAP2K6   | 1.11865249  | 0.976533841 |
| DHX34        | 11.71477542 | 14.48905747 | TCP10L   | 0.138525233 | 0.127507724 |
| MIER2        | 12.23083449 | 10.14750087 | PRKG1    | 1.605609162 | 1.513058317 |
| MTERF        | 3.94290537  | 4.010064673 | ALDH9A1  | 17.20236038 | 16.37692012 |
| DHX35        | 4.763489854 | 5.6718945   | LEPROT   | 15.11469379 | 12.94777988 |
| MIER1        | 6.413907863 | 5.623260706 | DGCR14   | 6.062096411 | 5.776061825 |
| DHX36        | 11.88291217 | 12.70441481 | ABLIM1   | 2.344075133 | 1.78711284  |
| DHX37        | 12.38292112 | 13.68733795 | ABLIM2   | 0.153351761 | 0.176188275 |
| DHX38        | 14.62162996 | 14.24975041 | ABLIM3   | 0.241012288 | 0.167123576 |
| RCE1         | 19.38307086 | 19.39098377 | HDAC10   | 3.362547871 | 3.457248139 |
| ZBED6        | 1.124889138 | 0.945343243 | HDAC11   | 4.853595254 | 4.650963499 |
| ZBED5        | 5.141605135 | 5.93275652  | AQP5     | 0.1         | 0.140651141 |
| ZBED4        | 7.244517549 | 7.944477696 | AQP3     | 0.821931161 | 0.218955103 |
| ZBED3        | 2.186837764 | 2.060579608 | AQP1     | 0.137015516 | 0.166074396 |
| RCC2         | 25.94960434 | 29.79693071 | DYNC2H1  | 0.919145618 | 1.045022556 |
| URGCP-MRPS24 | 77.84093237 | 83.36268088 | CPT1A    | 20.82908367 | 19.47681172 |
| DHX29        | 8.996641664 | 10.74809063 | IFRD2    | 30.44801955 | 44.42304351 |

|          |             |             |          |             |             |
|----------|-------------|-------------|----------|-------------|-------------|
| IKBKAP   | 7.144096927 | 8.557518424 | IFRD1    | 21.26533506 | 21.36309468 |
| DHX15    | 72.7043211  | 81.66780838 | CPT1C    | 22.14828731 | 18.52409182 |
| DHX16    | 8.449616038 | 8.21093388  | CPT1B    | 1.799837283 | 1.46542943  |
| STARD3NL | 23.20915733 | 23.64783245 | NIF3L1   | 14.70465472 | 18.657923   |
| GCH1     | 0.650406557 | 0.493000394 | HECA     | 4.46239152  | 3.61078036  |
| MAD2L2   | 79.25237095 | 74.1448901  | RTEL1    | 6.009774532 | 6.38248512  |
| MAD2L1   | 32.36181526 | 46.63537954 | TRANK1   | 1.069295601 | 0.322459064 |
| PHRF1    | 5.212946997 | 5.424409795 | STRIP1   | 13.18731344 | 13.16055645 |
| TPRA1    | 17.90062685 | 15.25014927 | STRIP2   | 1.156291849 | 1.057268805 |
| RPP25L   | 20.27708398 | 24.16744902 | OCEL1    | 10.71882197 | 11.45605087 |
| VCL      | 84.23306819 | 75.25443109 | TMED3    | 83.82839092 | 83.34807466 |
| VCP      | 177.2378343 | 168.0282413 | DGCR6L   | 22.59656776 | 20.36920337 |
| NDRG4    | 0.172965277 | 0.193777386 | TMED2    | 76.26934776 | 77.59443862 |
| NDRG3    | 23.90535015 | 24.68820219 | TMED1    | 30.43497597 | 27.68449279 |
| NDRG2    | 0.1         | 0.115784752 | TMED7    | 35.50563277 | 32.91231436 |
| NDRG1    | 0.563050485 | 0.398630435 | ERMAP    | 4.471169272 | 3.460412366 |
| TAF5L    | 13.11606046 | 13.23845074 | TMED6    | 0.265801948 | 0.573542547 |
| VDR      | 0.717977125 | 1.166346966 | TMED5    | 19.90346102 | 21.59116049 |
| NFXL1    | 2.482597637 | 2.257411151 | TMED4    | 98.46176218 | 91.74654559 |
| GULP1    | 9.528002586 | 9.387431022 | ZYG11B   | 2.486071176 | 2.669214015 |
| RCL1     | 7.314132412 | 13.70006093 | TMED9    | 344.823773  | 284.9736713 |
| GCLC     | 5.863280923 | 5.139280902 | ZYG11A   | 2.240815909 | 2.940035668 |
| PQLC1    | 19.21414908 | 19.93021462 | TMED8    | 4.366711332 | 3.941640524 |
| PQLC3    | 7.467040327 | 5.652435588 | HEG1     | 15.83215053 | 11.31734493 |
| PQLC2    | 14.50649608 | 12.37831907 | SDCCAG8  | 4.606281954 | 4.550732969 |
| TAF4B    | 1.324698594 | 1.966029408 | SDCCAG3  | 33.46761295 | 43.94564745 |
| GCLM     | 15.91860613 | 15.3527736  | DTYMK    | 42.16807292 | 47.62594161 |
| CNRIP1   | 13.49084467 | 15.4537915  | TM4SF18  | 20.58649785 | 22.31605435 |
| GATAD1   | 4.722160601 | 4.199159542 | TM4SF19  | 0.149056919 | 0.1         |
| GLRX3    | 29.84133756 | 39.60857936 | PRKRA    | 13.45578474 | 13.13939734 |
| GLRX5    | 38.74181234 | 50.65703605 | MYRFL    | 6.187880668 | 5.7013212   |
| GLRX2    | 20.94464817 | 25.97432579 | HELB     | 0.425118813 | 0.602971745 |
| RCN3     | 32.68863815 | 29.27114039 | ACYP2    | 1.967529564 | 1.675895949 |
| RCN1     | 85.31578699 | 75.68894673 | ACYP1    | 12.65377901 | 17.02600128 |
| PSRC1    | 32.93602156 | 36.5661611  | C15orf61 | 5.787803647 | 7.736193037 |
| RCN2     | 7.983210975 | 10.75209624 | LARGE    | 0.585631502 | 0.406430068 |
| VGF      | 38.45807172 | 33.8523494  | C15orf65 | 1.412598753 | 1.678475156 |
| MMRN2    | 0.283789895 | 0.435363924 | C15orf62 | 0.35046819  | 0.278838889 |
| TAF1D    | 8.256984037 | 12.59666269 | LONRF3   | 0.57647151  | 0.89382196  |
| TNKS2    | 9.986806616 | 8.944895218 | LONRF1   | 3.274478141 | 3.7328271   |
| TAF1B    | 5.658944818 | 4.714585266 | CPSF4    | 15.83332758 | 16.37186588 |
| TAF1C    | 3.8390174   | 4.537011261 | CPSF7    | 28.04775855 | 28.63474768 |
| TAF1A    | 2.795335835 | 2.571686556 | CPSF6    | 14.13024231 | 16.82766055 |
| VHL      | 12.87135559 | 13.64425147 | HELQ     | 2.61902133  | 2.504906442 |
| TAF15    | 42.44823399 | 51.28012978 | CPSF1    | 39.16984456 | 38.2781666  |
| TAF12    | 21.72547987 | 24.00285691 | CPSF3    | 19.14115451 | 21.45408844 |
| TAF13    | 20.35829691 | 19.64354682 | CPSF2    | 14.67544699 | 16.29213011 |
| TAF10    | 67.75747699 | 74.24292945 | HELZ     | 1.296638914 | 1.146068263 |
| TAF11    | 14.56786523 | 16.05856573 | SELO     | 8.42566901  | 9.297430404 |
| VIM      | 1918.592221 | 1654.342701 | BAMBI    | 66.66634039 | 41.04559062 |

|                     |             |             |          |             |             |
|---------------------|-------------|-------------|----------|-------------|-------------|
| RPL26L1             | 33.40081854 | 39.83609909 | SELM     | 72.50098369 | 58.13009209 |
| RAPH1               | 4.173361993 | 3.527281306 | SELK     | 14.8343475  | 15.38207091 |
| GCSH                | 6.585465006 | 10.13327252 | CRYL1    | 2.169069074 | 1.760590953 |
| BVES                | 3.07690989  | 2.352169601 | FGFR4    | 0.387678081 | 0.716222305 |
| ANKHD1-<br>EIF4EBP3 | 12.00977891 | 10.48761055 | SELT     | 24.63172047 | 24.28029457 |
| SLAIN2              | 14.25103244 | 13.68167521 | FGFR3    | 0.533428962 | 0.340703743 |
| A1BG                | 10.6608768  | 10.53929818 | FGFR2    | 5.44841921  | 5.596615621 |
| SLAIN1              | 0.651074298 | 0.851183693 | FGFR1    | 29.47778064 | 25.47432565 |
| GSDMD               | 16.53826169 | 9.209296257 | C15orf39 | 7.115277393 | 6.545924137 |
| GSDMC               | 0.463697223 | 0.291347946 | C15orf38 | 2.630302639 | 2.575612508 |
| GSDMB               | 0.516518984 | 0.559621593 | OPLAH    | 8.225081233 | 6.891498621 |
| TMEM190             | 0.1         | 0.1         | C15orf40 | 2.462540308 | 3.262932218 |
| TMEM192             | 4.584337145 | 4.927605609 | C15orf41 | 1.981857432 | 2.258465932 |
| TMEM198             | 4.031200897 | 1.797225377 | C15orf48 | 4.406559162 | 2.668955895 |
| TMEM199             | 12.32593889 | 13.36071641 | SMKR1    | 1.10388941  | 0.995994352 |
| ASAH2B              | 1.358103253 | 1.357632369 | MYRIP    | 0.1         | 0.1         |
| TMEM180             | 4.059211634 | 4.073010589 | TMEM2    | 5.213095174 | 3.989684143 |
| TMEM181             | 6.645649128 | 7.632926835 | TMEM5    | 7.580595282 | 9.169775086 |
| TMEM182             | 0.201354219 | 0.265414342 | TMEM9    | 63.48756483 | 61.35183124 |
| TMEM186             | 3.364893788 | 4.89047588  | C15orf52 | 0.538860046 | 0.385500434 |
| TMEM187             | 13.75006558 | 13.36222138 | C15orf57 | 3.94222986  | 3.13322088  |
| TMEM189             | 21.43055766 | 17.95900873 | C15orf56 | 0.368545135 | 0.396334974 |
| TMSB4X              | 3621.657381 | 3579.008844 | NXF1     | 16.76148984 | 18.18642489 |
| LDLRAP1             | 8.399908156 | 7.95781745  | SAP30L   | 12.28190735 | 9.886848118 |
| GPRASP2             | 1.050328237 | 0.985887099 | HES1     | 11.76325725 | 13.68342156 |
| TMEM171             | 1.164887083 | 0.806038302 | HES2     | 0.1         | 0.117406929 |
| TACR1               | 0.132619052 | 0.177635342 | HES4     | 27.53829175 | 13.50263668 |
| TMEM173             | 17.20212152 | 12.63526995 | CRYGS    | 0.470199123 | 0.892986925 |
| TMEM175             | 19.01017291 | 14.86547968 | C15orf26 | 0.584620121 | 0.399890647 |
| TMEM177             | 5.181540326 | 6.310818387 | ZFYVE9   | 4.450106927 | 4.148583681 |
| TMEM160             | 49.97103617 | 54.3536382  | C22orf24 | 0.641593104 | 0.754427952 |
| TMEM164             | 5.723451804 | 6.022652295 | ARAF     | 29.13464581 | 29.52359608 |
| TMEM165             | 26.77565569 | 28.26871714 | C22orf23 | 5.326486617 | 5.193917186 |
| TMEM168             | 0.760635827 | 1.209011191 | C22orf29 | 6.794550386 | 5.388783904 |
| TMEM169             | 0.143595477 | 0.172631934 | ZFYVE1   | 14.92670015 | 11.11594338 |
| TMEM154             | 0.1         | 0.1         | C22orf26 | 0.269775415 | 0.382853119 |
| TMEM158             | 302.0825169 | 237.2711991 | LRAT     | 0.213973683 | 0.188777422 |
| TMEM159             | 5.442338811 | 4.660480211 | HES7     | 1.489897422 | 2.481789505 |
| ZFP36               | 28.15131736 | 25.50696313 | HES6     | 7.74619895  | 5.738109164 |
| ZFP30               | 1.001345079 | 1.169946671 | HPCAL1   | 34.03713956 | 34.50823824 |
| ZFP37               | 1.121068812 | 1.444993487 | RNASE4   | 1.988639679 | 1.311716703 |
| TMSB10              | 4208.261218 | 4254.693118 | GAPVD1   | 7.83460846  | 7.36029321  |
| SYPL2               | 0.69113652  | 0.738031437 | C22orf39 | 7.641738236 | 8.243079474 |
| SYPL1               | 49.20341254 | 47.15478382 | RNASE1   | 0.157595651 | 0.1         |
| ZFP41               | 7.442707065 | 6.046511109 | C22orf46 | 4.548491255 | 3.798232447 |
| PHPT1               | 46.95927836 | 45.82339218 | SDR39U1  | 18.62301797 | 20.30030498 |
| MAD1L1              | 46.47287105 | 40.12051383 | MCTS1    | 3.363871217 | 3.987896056 |
| ILDR1               | 0.117988669 | 0.1         | LRBA     | 1.528864972 | 1.562703714 |
| HMBOX1              | 1.877086407 | 1.902756366 | NETO2    | 13.56624379 | 16.69793134 |

|            |             |             |         |             |             |
|------------|-------------|-------------|---------|-------------|-------------|
| ZFP57      | 0.1         | 0.1         | SETX    | 5.993049657 | 4.634464797 |
| ESRRA      | 22.04745092 | 27.83650179 | DCHS2   | 0.624642609 | 0.68271805  |
| ZG16B      | 0.1         | 0.189599435 | DCHS1   | 0.119266188 | 0.103439103 |
| ZFP69      | 3.664751503 | 3.575559283 | ARF3    | 91.12251744 | 90.56512933 |
| ZFP62      | 4.721907842 | 4.478660272 | ARF4    | 211.159527  | 179.878795  |
| TADA3      | 52.98783234 | 52.98114959 | ARF1    | 348.4867647 | 324.4290623 |
| ZFP64      | 10.51254525 | 11.51358959 | HEXB    | 170.9297908 | 159.1697752 |
| TADA1      | 3.957653737 | 5.625364904 | HEXA    | 29.94480417 | 28.746377   |
| ZFP82      | 3.93279681  | 3.55985342  | AREG    | 0.225891624 | 0.279777865 |
| DHFR1L1    | 1.424500378 | 1.816982444 | IKBKB   | 14.82800711 | 13.37133053 |
| AIM1L      | 0.109904915 | 0.1         | HEY1    | 14.00626373 | 12.20187113 |
| PDCC1      | 2.648148813 | 2.931161434 | IKBKG   | 5.780374242 | 5.551643723 |
| HIF1AN     | 7.353035631 | 7.039056259 | IKBKE   | 3.389948456 | 3.217874647 |
| ZFP91      | 17.7679714  | 19.11683454 | IKBIP   | 17.10492463 | 15.08078754 |
| ZFP90      | 4.987797506 | 5.282332755 | ARG2    | 8.046106473 | 7.945762558 |
| ESRP2      | 0.410079743 | 0.358303072 | RRAS2   | 26.73997707 | 23.91236754 |
| ESRP1      | 0.222848527 | 0.158477403 | GPRC5B  | 0.354351417 | 0.622133306 |
| SNRPA1     | 26.2473377  | 32.78069598 | GPRC5A  | 70.30984573 | 47.12150703 |
| SNRPB2     | 24.26769696 | 29.71354611 | GPRC5C  | 0.465693107 | 0.385590809 |
| CDRT4      | 0.827900198 | 0.486088199 | ARF5    | 72.52842264 | 78.92510312 |
| ERVMER34-1 | 0.239232903 | 0.186987994 | ARF6    | 53.93729693 | 55.22801442 |
| TXNRD3     | 1.506012635 | 1.421614691 | RNASEL  | 0.210247935 | 0.126239684 |
| TXNRD2     | 11.01001333 | 10.97091892 | RNASEK  | 289.3190254 | 257.8828046 |
| TXNRD1     | 65.7852437  | 62.97469829 | STAU1   | 54.07499992 | 52.41004767 |
| MMACHC     | 6.188325091 | 9.197832335 | STAU2   | 11.50093267 | 11.7342794  |
| CBLN3      | 1.09650787  | 0.748278266 | PROKR2  | 0.1         | 0.1         |
| VIPR1      | 0.62492607  | 0.392817857 | STAT6   | 23.75282316 | 20.03914803 |
| GDE1       | 21.39701651 | 20.42159121 | STAT1   | 190.7689044 | 76.42374396 |
| C21orf2    | 3.650338233 | 2.99305852  | STAT2   | 15.19986777 | 5.742470013 |
| RAPGEFL1   | 1.394988014 | 1.855381184 | STAT3   | 62.47254806 | 49.95013018 |
| TRMT44     | 3.641302787 | 3.879799083 | HEYL    | 0.1         | 0.1         |
| ZFPL1      | 35.7837054  | 33.63462498 | LRG1    | 0.1         | 0.120839419 |
| AGFG2      | 2.691624709 | 2.713785561 | UBAP1   | 40.34520939 | 39.77974988 |
| AGFG1      | 14.71755921 | 14.34173569 | UBAP2   | 27.84615353 | 30.13726948 |
| DOPEY1     | 1.40140127  | 1.009537457 | CCNT2   | 1.930634294 | 1.848756842 |
| DOPEY2     | 6.788318069 | 4.403743037 | CCNT1   | 7.269995424 | 7.037798561 |
| CARHSP1    | 12.73586909 | 13.53529614 | ERO1L   | 14.97909685 | 14.66870575 |
| PDE12      | 9.857940829 | 12.33466488 | PITX2   | 2.041266458 | 2.573655232 |
| WTH3DI     | 0.411679327 | 0.292197752 | PITX1   | 111.393021  | 90.52384025 |
| ZFPM2      | 2.754107886 | 2.283463802 | PITX3   | 0.137428874 | 0.126724904 |
| CBLL1      | 8.991106448 | 10.22781896 | KHNYN   | 11.22775468 | 10.42205755 |
| ZFPM1      | 3.36999707  | 3.167336172 | ADCYAP1 | 0.377034595 | 0.308218727 |
| NECAB1     | 0.767078654 | 1.117563702 | NPTXR   | 0.904061037 | 0.393436224 |
| NECAB3     | 9.094017054 | 9.196166301 | PFKFB2  | 2.046428446 | 1.725787009 |
| PDE1C      | 9.340526518 | 8.102410372 | ARL9    | 1.621805083 | 2.16078701  |
| TRMT2A     | 15.42788848 | 16.89548314 | PFKFB4  | 3.099102446 | 3.053324858 |
| TRMT2B     | 3.313179909 | 3.760402678 | PFKFB3  | 36.05575222 | 33.63930858 |
| VPS8       | 4.872632373 | 4.010529567 | ARL6    | 1.914773492 | 1.627861902 |
| TRMT1L     | 7.572121053 | 7.539029696 | ARL3    | 7.475633024 | 8.708067989 |
| GDF1       | 5.238261562 | 5.276941878 | ARL1    | 20.55924984 | 18.63199189 |

|         |             |             |              |             |             |
|---------|-------------|-------------|--------------|-------------|-------------|
| IFNLR1  | 0.1         | 0.1         | ARL2         | 127.9107437 | 134.6988315 |
| HSPBAP1 | 2.133383314 | 2.325411958 | RAP1GAP      | 0.169509335 | 0.149630942 |
| GDF5    | 0.75402363  | 0.426889421 | BCL2L12      | 24.0292384  | 30.14159887 |
| GDF9    | 0.325629867 | 0.489334354 | BCL2L13      | 21.56077693 | 16.76057152 |
| CORO6   | 5.658659823 | 4.959365951 | SBNO1        | 4.14593782  | 4.202713423 |
| TRMT12  | 8.945757971 | 11.2783771  | SBNO2        | 35.37300062 | 32.55647082 |
| TRMT13  | 1.885153647 | 2.661067152 | BCL2L10      | 0.1         | 0.1         |
| TRMT11  | 4.196516464 | 4.715403165 | BCL2L11      | 2.079190044 | 1.513178052 |
| CORO7   | 1.670588514 | 1.666133677 | CPAMD8       | 0.1         | 0.1         |
| GDI1    | 149.9650904 | 133.6748813 | NPTX1        | 22.63101179 | 9.801656116 |
| SH3KBP1 | 25.38891368 | 24.24311865 | MFHAS1       | 11.23950495 | 11.07708611 |
| GDI2    | 128.3197147 | 137.2499892 | CNTNAP3      | 9.981435223 | 6.913321651 |
| ZBTB8OS | 10.66724371 | 13.62933516 | CNTNAP1      | 10.44093187 | 7.392534552 |
| ATP6V0B | 98.81889453 | 99.32894166 | FAM47E-STBD1 | 4.666958662 | 3.579093363 |
| BBS10   | 3.76834303  | 5.007238283 | NXT1         | 28.70343361 | 35.73298147 |
| BBS12   | 1.371534751 | 1.256490612 | COX4I1       | 188.5729357 | 207.8722932 |
| WAC     | 34.29278003 | 35.59117722 | PIK3CD       | 2.644278026 | 2.362257409 |
| RDH5    | 0.603253801 | 0.404050542 | PIK3CB       | 5.005910986 | 4.934253272 |
| KPTN    | 4.993514834 | 7.022193332 | NXT2         | 3.306157892 | 3.115785868 |
| ATP6V0C | 136.7582743 | 119.4614822 | EIF3CL       | 7.076751903 | 7.705944325 |
| WAS     | 0.326985372 | 0.24181276  | ARNT         | 12.82426772 | 12.42206778 |
| TLDC1   | 3.789264445 | 3.617055229 | PIK3CA       | 6.203838165 | 5.367335946 |
| TJP1    | 8.08190845  | 5.975227269 | PIK3C3       | 7.023451379 | 7.799245309 |
| TJP3    | 0.116635055 | 0.218777349 | LRP1         | 33.1215631  | 19.13860257 |
| TJP2    | 22.10366193 | 24.29590144 | LRP5         | 1.380801443 | 2.083795726 |
| AMY2B   | 0.67929613  | 0.927256159 | LRP4         | 0.169462021 | 0.18566782  |
| TMEM140 | 7.658847599 | 5.53325743  | LRP3         | 10.98757157 | 11.735812   |
| TMEM141 | 24.92520228 | 23.87831165 | LRP8         | 5.126251004 | 6.19101174  |
| TMEM143 | 1.301185595 | 1.320528367 | LRP6         | 2.217201273 | 2.111949321 |
| RDM1    | 0.1         | 0.1         | PRIMPOL      | 5.487539834 | 5.304497389 |
| TMEM144 | 0.585379622 | 0.524827702 | PCBD1        | 22.66730421 | 26.64850859 |
| TMEM145 | 0.770903633 | 1.120558193 | PCBD2        | 2.131736232 | 2.237048262 |
| TMEM147 | 144.4449559 | 153.1998349 | CNNM2        | 4.035327794 | 3.334031639 |
| TMEM14A | 18.37251811 | 20.67538478 | CNNM3        | 3.184992694 | 3.595016449 |
| PDE8A   | 6.497504539 | 6.347058407 | CNNM4        | 3.58506483  | 3.214364368 |
| TMEM14B | 37.90096774 | 44.46416479 | METAP1D      | 0.980530118 | 1.695968036 |
| TMEM14C | 73.71587858 | 70.19453642 | EIF4A2       | 62.82065856 | 66.14762428 |
| TMEM131 | 12.66711425 | 10.68809706 | EPHB6        | 0.112846508 | 0.1         |
| TMEM133 | 2.003387303 | 2.418385386 | EIF4A1       | 290.0252138 | 337.9197531 |
| TMEM134 | 9.378473543 | 9.264097702 | TAS2R20      | 0.154285556 | 0.255043537 |
| TMEM135 | 1.730629288 | 1.738189497 | LRR1         | 14.56175496 | 17.63714014 |
| TMEM136 | 1.310876917 | 1.288809001 | ULK4         | 0.798299648 | 0.748969837 |
| TMEM138 | 21.08899205 | 28.7655026  | EIF4A3       | 42.07447465 | 48.36092208 |
| TMEM139 | 0.208958215 | 0.255596335 | TONSL        | 11.67541188 | 14.60903598 |
| LMX1B   | 0.108943239 | 0.106385637 | DNHD1        | 0.56831289  | 0.496769083 |
| PDE9A   | 0.1         | 0.13599628  | PALM2-AKAP2  | 10.38799726 | 9.799046509 |
| ATP6V1A | 10.99246238 | 11.92361404 | NUBP1        | 10.23191183 | 14.04994283 |
| SEL1L3  | 0.294146342 | 0.246778411 | NUBP2        | 17.30240959 | 16.33089107 |

|              |             |             |           |             |             |
|--------------|-------------|-------------|-----------|-------------|-------------|
| TMEM121      | 2.676096379 | 3.124758454 | BAIAP2L2  | 21.0048877  | 21.27714828 |
| TMEM123      | 38.60761784 | 41.68886319 | BAIAP2L1  | 3.667226648 | 4.011564662 |
| TMEM125      | 0.125654952 | 0.118318107 | BCAP29    | 7.740896942 | 8.314056167 |
| TMEM127      | 13.50349733 | 10.49411972 | CCNL2     | 18.06225433 | 20.68633529 |
| PODXL        | 19.56436547 | 16.64484116 | EPHB2     | 0.121339609 | 0.115236873 |
| TMEM128      | 6.128987686 | 5.989662643 | ACAD11    | 3.22642668  | 3.50064628  |
| TMEM129      | 8.596789749 | 8.285036315 | CCNL1     | 18.15410777 | 17.7746283  |
| ATP6V1H      | 62.46054473 | 54.94370772 | EPHB1     | 0.133323462 | 0.1         |
| SUDS3        | 5.528073356 | 5.843005423 | ACAD10    | 4.033977877 | 4.444361804 |
| OR2B6        | 0.541199804 | 0.139378096 | EPHB4     | 40.54104232 | 37.10891183 |
| ATP6V1D      | 36.7190341  | 35.05806801 | EPHB3     | 0.124621458 | 0.108790087 |
| ATP6V1F      | 174.3307208 | 176.2632372 | EPHA5     | 1.278327265 | 1.130760585 |
| TMEM110      | 6.48189856  | 5.819399202 | EPHA4     | 6.324689751 | 3.781456191 |
| GDNF         | 2.202466823 | 2.598771507 | ARSA      | 9.238127283 | 5.447061729 |
| TMEM115      | 41.51223511 | 40.96555395 | EPHA7     | 1.077409636 | 0.719724932 |
| TMEM116      | 7.974096681 | 7.05383514  | ULK3      | 6.67967409  | 7.360558093 |
| TMEM117      | 0.550394532 | 0.71844225  | ULK2      | 1.958854095 | 1.528728142 |
| OR2A7        | 0.1         | 0.1         | ULK1      | 2.995025201 | 2.877445227 |
| POC1B-GALNT4 | 0.733321608 | 0.666941404 | EPHA1     | 0.1         | 0.1         |
| ELAVL1       | 17.57717109 | 19.8839635  | EPHA2     | 121.5511816 | 102.5113407 |
| ELAVL2       | 12.08875623 | 12.33770747 | PIK3R4    | 7.512773992 | 8.425759465 |
| TMEM100      | 0.1         | 0.1         | SUPT4H1   | 23.49505218 | 24.6839768  |
| TMEM101      | 14.46467003 | 15.44441737 | PIK3R3    | 16.66032776 | 15.09454048 |
| TMEM102      | 4.233984027 | 4.179794252 | PIK3R2    | 16.61054282 | 17.64466291 |
| UPK1A        | 0.175952159 | 0.1         | PIK3R1    | 18.81735613 | 13.65067174 |
| TMEM104      | 10.37210972 | 9.512185774 | ART3      | 0.1         | 0.1         |
| TMEM105      | 0.1         | 0.1         | PIK3R5    | 0.1         | 0.1         |
| TMEM107      | 7.120442835 | 7.013383448 | RAB11FIP1 | 0.68855189  | 0.869647287 |
| PDE4B        | 4.84479476  | 4.625781372 | PCBP3     | 7.178328839 | 6.086539639 |
| TMEM108      | 1.915252084 | 1.381394662 | PCBP4     | 30.06216358 | 29.44839486 |
| PDE4A        | 2.067604338 | 3.065049483 | PCBP1     | 177.0191688 | 175.3386879 |
| TMEM109      | 94.69135355 | 100.9594728 | MICAL1    | 11.09430719 | 9.139246688 |
| PDE4D        | 1.482827081 | 1.526192359 | ARSJ      | 11.71691336 | 9.707687805 |
| UPK3B        | 0.223302081 | 0.290753228 | ARSK      | 3.330453097 | 3.770603589 |
| PDE5A        | 3.326048678 | 2.594528273 | PCBP2     | 120.3530347 | 118.0386261 |
| POLDIP2      | 52.85258202 | 55.51647741 | ARSI      | 1.035024562 | 1.282984144 |
| POLDIP3      | 21.37443473 | 20.83534146 | ARSG      | 0.931486507 | 0.788688104 |
| IER5L        | 107.4723625 | 103.9362895 | N4BP3     | 0.60036102  | 0.61126134  |
| WIZ          | 22.68566358 | 23.11629021 | RAB11FIP2 | 1.377355319 | 1.218003105 |
| DBF4B        | 9.548466501 | 9.957572706 | ARSD      | 1.36457241  | 1.110740223 |
| SLC22A18AS   | 0.1         | 0.147925279 | N4BP2     | 0.626209988 | 0.619940737 |
| PDE6D        | 18.36194262 | 17.08766823 | RAB11FIP3 | 3.404990692 | 3.497972184 |
| ZFC3H1       | 4.171621456 | 4.572236017 | ARSB      | 6.521232556 | 5.832623772 |
| PDE7B        | 4.210150169 | 4.207396615 | CLHC1     | 0.197105191 | 0.210935824 |
| PDE7A        | 7.730906918 | 8.642119099 | RAB11FIP4 | 0.744571734 | 0.64196022  |
| TESK1        | 19.98437191 | 13.07411218 | N4BP1     | 4.815532458 | 4.119491691 |
| TESK2        | 1.083988874 | 0.814494373 | RAB11FIP5 | 6.087351454 | 5.145897605 |
| NDST2        | 7.718480557 | 6.635108355 | WWTR1     | 34.50387714 | 32.62359612 |
| NDST1        | 38.17933659 | 34.98298443 | MICAL3    | 17.07812392 | 16.53805649 |

|           |             |             |          |             |             |
|-----------|-------------|-------------|----------|-------------|-------------|
| WLS       | 34.86424865 | 30.83933585 | MICAL2   | 13.30389704 | 9.69863896  |
| TPRG1L    | 36.85959384 | 32.24420331 | ARTN     | 6.540461806 | 6.034303333 |
| PDGFB     | 0.392293237 | 0.297718386 | CCNJL    | 0.129559759 | 0.163318634 |
| GATA6     | 19.21310906 | 15.42963154 | CETN2    | 50.94490719 | 53.06222615 |
| PDGFA     | 0.155483742 | 0.126410941 | CETN3    | 7.733509361 | 10.1484893  |
| GATA3     | 21.69277831 | 18.6350003  | ARV1     | 19.44241316 | 23.69137627 |
| GATA2     | 7.664703928 | 8.682362476 | STBD1    | 7.124249242 | 5.266283395 |
| CIAO1     | 12.43089772 | 13.75519268 | NCOA1    | 3.403983479 | 2.564187526 |
| PDGFD     | 1.440090541 | 1.289094232 | NCOA2    | 7.19289124  | 5.672593914 |
| PDGFC     | 4.43350502  | 4.777563477 | NCOA5    | 20.21109456 | 22.93660671 |
| HNRNPA1L2 | 2.648138744 | 3.378089104 | NCOA6    | 11.55399862 | 11.27237206 |
| LIN54     | 5.386627011 | 5.217688288 | NCOA3    | 10.04065205 | 8.793655254 |
| HOXC13    | 10.89788645 | 9.590285419 | NCOA4    | 38.57007348 | 35.82471863 |
| HOXC12    | 7.626510092 | 8.619861489 | VSNL1    | 0.1         | 0.1         |
| HOXC11    | 7.904168264 | 9.514670551 | NCOA7    | 7.174182729 | 6.084389724 |
| HOXC10    | 61.11624469 | 59.3560379  | CRELD1   | 4.878900849 | 3.525981965 |
| TCP11L1   | 2.289940475 | 2.097277102 | CRELD2   | 31.78962218 | 26.80686174 |
| TCP11L2   | 0.786278428 | 0.57776502  | SFI1     | 3.517694211 | 3.071517451 |
| LIN52     | 2.729347166 | 3.25651136  | SAMM50   | 25.12891818 | 28.91346393 |
| PHF20L1   | 11.13228459 | 11.85073059 | BCAP31   | 197.2812996 | 195.0274028 |
| SAMD5     | 0.461457335 | 0.375684031 | NUBPL    | 1.492613505 | 1.797673509 |
| SAMD8     | 3.279782825 | 2.693257444 | CCNG2    | 2.178430701 | 2.126151934 |
| LIN37     | 17.6279091  | 13.6796904  | LKAAEAR1 | 0.159851702 | 0.1         |
| SAMD9     | 25.73839096 | 10.15411535 | CCNG1    | 25.67568943 | 30.28034266 |
| WRB       | 8.978841032 | 10.54299258 | AUNIP    | 6.611931573 | 8.867400053 |
| WRN       | 6.591649298 | 7.504630804 | TARDBP   | 45.90385293 | 55.32342311 |
| SAMD1     | 32.13462114 | 39.93553642 | KLHL36   | 2.03767152  | 1.938260713 |
| FAM200B   | 4.258471658 | 4.016670225 | KLHL38   | 0.90361393  | 0.741300416 |
| FAM200A   | 2.35511974  | 2.873116925 | KLHL34   | 0.1         | 0.1         |
| SLMAP     | 7.839828277 | 7.020940434 | KLHL35   | 1.922851824 | 1.191004887 |
| EBAG9     | 8.119886772 | 9.549219275 | CCND3    | 50.46359772 | 49.53497194 |
| LIMS2     | 3.826650099 | 2.032317794 | CCND1    | 40.09606355 | 40.26444572 |
| LIMS1     | 5.118647776 | 5.857077595 | BANF1    | 98.545866   | 131.4751719 |
| FAM204A   | 2.037339082 | 2.090004335 | PDGFRA   | 1.151740613 | 0.643606907 |
| CEP250    | 10.51022705 | 10.24251829 | CYBB     | 0.1         | 0.1         |
| CDC25C    | 11.84194434 | 13.16338572 | CYBA     | 0.171855155 | 0.1         |
| NCCRP1    | 0.1         | 0.212805371 | PDGFRL   | 0.945401358 | 0.547856075 |
| FAM203A   | 29.88827898 | 35.91399329 | KLHL42   | 5.191530314 | 5.13457689  |
| CDC25A    | 5.763334025 | 8.777993004 | PROCR    | 1.780364754 | 2.69959116  |
| CDC25B    | 195.2968029 | 164.6752535 | CCNE2    | 12.34960436 | 16.09660411 |
| TPST2     | 4.303849585 | 5.325052378 | RRNAD1   | 7.426755677 | 6.410422276 |
| TPST1     | 7.470951536 | 6.954553379 | CCNE1    | 7.624530101 | 9.606928054 |
| FAM206A   | 5.181008784 | 6.405232221 | C9orf114 | 5.995594353 | 6.293475386 |
| LIN7A     | 0.691315348 | 0.220631435 | C9orf116 | 6.432011598 | 5.597334876 |
| LIN7C     | 1.9095148   | 1.88131507  | C9orf117 | 1.276596865 | 1.263231692 |
| LIN7B     | 6.9205971   | 5.561717719 | KLHL18   | 8.492129358 | 9.709008535 |
| SLMO2     | 25.55876078 | 31.33262216 | KLHL15   | 2.646317213 | 2.369787912 |
| SLMO1     | 1.367840577 | 2.233830593 | KLHL17   | 6.368980909 | 7.366864584 |
| LRGUK     | 0.119241214 | 0.15495432  | KLHL11   | 0.65837572  | 0.769800077 |
| LEAP2     | 0.467406485 | 1.096872924 | KLHL12   | 14.7764692  | 13.42411781 |

|           |             |             |          |             |             |
|-----------|-------------|-------------|----------|-------------|-------------|
| FAM208B   | 6.051826592 | 6.109594897 | KLHL13   | 1.054554045 | 1.173704785 |
| FAM208A   | 8.334803426 | 9.427197522 | CCNB3    | 0.157519129 | 0.206781258 |
| TSPAN12   | 0.1         | 0.1         | CCNB2    | 35.88567626 | 45.98277753 |
| TSPAN10   | 2.7088366   | 1.134865144 | CCNB1    | 148.6725086 | 191.2657858 |
| CEP290    | 1.049737311 | 1.414741619 | BRINP2   | 0.1         | 0.108734204 |
| APAF1     | 1.804978635 | 1.786801883 | C9orf129 | 0.325092188 | 0.517871889 |
| FAM207A   | 16.02150373 | 21.19441232 | CYC1     | 348.7713743 | 429.7791015 |
| HAND2     | 1.526027451 | 2.011101467 | PRODH    | 0.1         | 0.1         |
| PBXIP1    | 25.06064792 | 18.71085862 | KLHL29   | 1.499945898 | 1.785435166 |
| TSPAN33   | 1.783937943 | 1.673304289 | KLHL25   | 1.595203736 | 1.822265114 |
| TSPAN31   | 7.6538351   | 5.962583734 | KLHL26   | 2.206581154 | 2.255535838 |
| KCTD20    | 15.29415631 | 15.0935789  | KLHL28   | 0.765551627 | 0.71723469  |
| KCTD21    | 2.015015938 | 2.187990425 | KLHL21   | 14.7927057  | 13.69926529 |
| MARCKSL1  | 357.5726792 | 355.5818012 | KLHL22   | 12.45384918 | 9.018749057 |
| MID1IP1   | 23.03542505 | 24.95358135 | KLHL23   | 0.915921896 | 1.219652132 |
| KIAA1549L | 0.207281935 | 0.160642674 | KLHL24   | 2.304884431 | 2.189108254 |
| SYT14     | 4.136114939 | 2.896471764 | KLHL20   | 6.259379978 | 5.43894807  |
| REC8      | 1.969711768 | 2.023048032 | APPBP2   | 3.849061225 | 3.530311413 |
| SUGCT     | 2.134495679 | 2.718893144 | CYCS     | 21.44148702 | 32.13708863 |
| SYT17     | 0.270220436 | 0.160770259 | YWHAE    | 516.2331437 | 549.1734318 |
| TSPAN15   | 0.497508299 | 0.645823516 | LGALS3BP | 16.26006536 | 8.273847237 |
| TSPAN14   | 5.00245745  | 5.222119623 | MCUR1    | 5.645521066 | 6.181788898 |
| TSPAN13   | 4.879954506 | 5.05368991  | YWHAB    | 124.2121007 | 120.5955792 |
| SYT12     | 2.494200993 | 1.510855293 | C9orf142 | 45.39741884 | 58.89333974 |
| SYT11     | 18.25342917 | 21.15515455 | SFR1     | 2.851313734 | 3.844084062 |
| TSPAN18   | 0.1         | 0.108289199 | YWHAQ    | 244.6674357 | 244.8490858 |
| TSPAN17   | 25.71430812 | 25.22599432 | ABHD16A  | 7.881248534 | 5.541567108 |
| PIK3AP1   | 0.1         | 0.1         | YWHAG    | 72.39088822 | 71.75400981 |
| RECK      | 2.443223961 | 2.91653347  | YWHAH    | 111.4490002 | 112.0652132 |
| SMARCAL1  | 10.93178566 | 9.79596823  | TBC1D8   | 10.91081335 | 11.36072902 |
| KCTD10    | 15.55749732 | 17.29724186 | ABHD14B  | 11.76079134 | 12.30743589 |
| KCTD13    | 5.788316873 | 4.874496636 | TBC1D9   | 3.707990618 | 3.764790023 |
| KCTD11    | 4.672936357 | 4.457593474 | ABHD14A  | 12.196958   | 12.05182069 |
| MGARP     | 0.837172713 | 0.903383733 | YWHAZ    | 437.6400911 | 452.254907  |
| KCTD12    | 3.173596473 | 2.704977519 | CCNA2    | 34.83939929 | 43.66377057 |
| KCTD17    | 14.57774814 | 12.32633681 | TBC1D1   | 7.02511212  | 7.323017417 |
| BCORL1    | 3.273998745 | 2.773664338 | CCNA1    | 2.320817947 | 2.667331603 |
| KCTD18    | 3.59875947  | 2.976690438 | TBC1D2   | 68.00884832 | 44.35832304 |
| KCTD15    | 1.943364451 | 2.64965984  | SFPQ     | 31.88574748 | 39.54443916 |
| LPAR1     | 16.49418087 | 12.32188988 | C9orf156 | 6.514451328 | 6.247976374 |
| LPAR2     | 0.562817612 | 0.760920555 | TBC1D4   | 11.48814649 | 12.39764072 |
| LPAR3     | 1.047392495 | 1.719057776 | TBC1D5   | 4.928677386 | 4.893809354 |
| MBTD1     | 1.196749181 | 1.590635937 | TBC1D7   | 4.755374171 | 5.953170377 |
| CEP192    | 3.601758891 | 3.572159958 | RRBP1    | 188.5192807 | 139.2715987 |
| STAT5B    | 4.260997449 | 4.541979067 | ABHD17C  | 1.706967466 | 2.033297644 |
| OSGIN1    | 1.438950438 | 1.400207887 | C9orf172 | 2.492842849 | 2.213519533 |
| OSGIN2    | 13.82805765 | 15.29235869 | CYGB     | 0.147969785 | 0.1         |
| NTAN1     | 34.5353009  | 35.36836636 | C9orf163 | 0.160572806 | 0.244166989 |
| AIMP1     | 9.611740476 | 11.28956252 | C9orf169 | 0.620714418 | 0.500399635 |
| AIMP2     | 39.25378865 | 46.74597868 | ABHD16B  | 5.043561829 | 3.525362192 |



|                    |             |             |          |             |             |
|--------------------|-------------|-------------|----------|-------------|-------------|
| LPAR5              | 0.1         | 0.1         | PROB1    | 3.759440919 | 3.591484112 |
| LPAR6              | 4.40621437  | 4.545372777 | ABHD17B  | 3.782113703 | 4.748721212 |
| MRAP2              | 0.72788025  | 0.697757378 | ABHD17A  | 52.1955193  | 49.93080259 |
| SUGP2              | 17.31768643 | 17.78595733 | ASB8     | 11.35312773 | 11.49939359 |
| RPL17-<br>C18orf32 | 36.32100984 | 49.46036455 | ASB9     | 0.926315847 | 1.089685296 |
| SUGP1              | 14.40756916 | 15.31811946 | ASB6     | 19.48899887 | 20.30034969 |
| B3GNTL1            | 0.991229912 | 1.226877814 | ASB7     | 2.810046473 | 2.408579526 |
| SPTAN1             | 28.1179331  | 23.55756427 | QRICH1   | 34.86162433 | 35.01030357 |
| ATMIN              | 7.370616445 | 7.258122079 | QRICH2   | 0.108142833 | 0.134884796 |
| IL15               | 1.148250141 | 0.848469858 | ASB3     | 1.436981393 | 1.903188633 |
| PABPC4             | 51.20812267 | 62.5140605  | ASB1     | 4.205618259 | 4.307226516 |
| IL18               | 0.1         | 0.132340162 | MAML2    | 5.425900846 | 4.549630677 |
| IL16               | 0.362191016 | 0.398643251 | MAML1    | 11.04762188 | 10.71685203 |
| PABPC1             | 673.0055836 | 770.3707905 | MYT1L    | 0.1         | 0.1         |
| TAGLN              | 31.9981508  | 9.534354403 | THYN1    | 7.45419288  | 8.018663786 |
| RELA               | 59.58804097 | 52.41745082 | WSB1     | 5.849010898 | 6.129346858 |
| RELB               | 24.10381512 | 20.80372066 | WSB2     | 38.96898451 | 39.12146958 |
| PDZD11             | 68.8190563  | 68.58153755 | IFT80    | 3.486130514 | 3.861869703 |
| MGAT5              | 3.096962151 | 3.457262144 | IFT88    | 4.662177013 | 5.26501048  |
| MGAT3              | 0.119269761 | 0.127517927 | IFT81    | 5.71100196  | 6.415906312 |
| MGAT1              | 84.97751513 | 66.34564211 | UBA52    | 179.1849783 | 217.2546064 |
| MGAT2              | 29.78370639 | 28.35505465 | NEDD4L   | 0.427198834 | 0.458495036 |
| XDH                | 1.299504733 | 0.898072842 | ATXN7L3B | 17.21485578 | 18.59671078 |
| RELT               | 3.303390187 | 3.160295183 | CYLD     | 2.451140514 | 1.863757901 |
| IL32               | 0.414311961 | 0.420606449 | FA2H     | 0.121379126 | 0.1         |
| IL34               | 0.158405033 | 0.204255667 | SLC2A11  | 2.551132553 | 2.418385386 |
| VEGFB              | 60.11020083 | 49.13417202 | SLC2A10  | 0.1         | 0.1         |
| VEGFC              | 17.79138106 | 15.7429769  | SLC2A12  | 0.508261509 | 0.285503957 |
| VEGFA              | 35.15505336 | 33.46651649 | FN3KRP   | 10.01700425 | 8.77555473  |
| KITLG              | 1.684404185 | 2.015021256 | LSG1     | 11.90975277 | 12.53049186 |
| HNRNPA2B1          | 178.2387115 | 220.9315312 | SLCO4A1  | 25.08377333 | 29.36376942 |
| AGGF1              | 9.824302011 | 9.799272992 | ASIP     | 0.1         | 0.153449807 |
| TMEM260            | 3.474883612 | 2.988194927 | ANKRD54  | 19.67083449 | 21.53903991 |
| TMEM261            | 17.22909012 | 22.86063433 | ANKRD52  | 17.94324705 | 17.29290604 |
| IL6R               | 0.959859001 | 1.127435104 | ANKRD50  | 5.16640096  | 4.830581319 |
| GEN1               | 2.213299943 | 2.162405344 | ERP44    | 19.54700208 | 17.84599558 |
| IL4R               | 3.531518558 | 3.897271222 | ZNFX1    | 38.20183195 | 17.65820727 |
| TMEM251            | 10.59602933 | 10.67343499 | ANKRD61  | 0.465082762 | 0.412810959 |
| TMEM253            | 0.158470768 | 0.141749202 | ANKRD39  | 8.585375239 | 9.085031362 |
| TMEM254            | 5.565223695 | 5.584271522 | ANKRD37  | 0.771205129 | 0.898754655 |
| TMEM256            | 48.27103853 | 66.19085325 | ANKRD36  | 0.353057796 | 0.472004532 |
| TMEM258            | 147.2320837 | 154.2528852 | DACH1    | 0.655947164 | 0.574930085 |
| TMEM259            | 66.19669633 | 67.63705404 | GRB14    | 0.404699572 | 0.364181326 |
| CACNA1C            | 2.862359399 | 1.953492461 | NAGLU    | 22.650177   | 14.72173924 |
| HOXB13             | 0.134200972 | 0.161050306 | GRB10    | 5.386953736 | 5.669754285 |
| C8orf44            | 3.175339863 | 3.64864909  | ANKRD32  | 1.89672589  | 2.295946899 |
| TMEM241            | 2.043401143 | 2.057541168 | ANKRD49  | 2.363493957 | 3.780208613 |
| TMEM242            | 1.660501855 | 1.856198836 | ANKRD46  | 2.11521447  | 2.853171161 |
| TMEM243            | 3.854691503 | 6.144253095 | ANKRD44  | 0.750615238 | 0.734387167 |

|           |             |             |          |             |             |
|-----------|-------------|-------------|----------|-------------|-------------|
| C8orf48   | 0.1         | 0.1         | CD180    | 0.335874129 | 0.405258462 |
| TMEM245   | 8.57123486  | 7.758180362 | CYS1     | 1.876928561 | 1.300546754 |
| SNTG2     | 0.1         | 0.1         | CLIP3    | 9.555252667 | 6.658025328 |
| C8orf46   | 3.113623859 | 1.662986511 | BSCL2    | 43.72226635 | 37.17651909 |
| C8orf47   | 0.368135623 | 0.14786344  | CLIP2    | 3.20979242  | 2.160416564 |
| TMEM248   | 25.24206444 | 22.77838239 | CLIP1    | 14.72132983 | 12.86331757 |
| TMEM249   | 0.685183345 | 0.541044529 | CLIP4    | 3.372989958 | 2.802392862 |
| PDHA1     | 39.81605081 | 48.55864394 | ERP29    | 138.5896813 | 142.7815006 |
| C8orf33   | 35.91203808 | 49.83764964 | ANKRD42  | 1.293115083 | 1.441298948 |
| TJAP1     | 15.75289843 | 15.46287115 | ERP27    | 0.1         | 0.1         |
| C8orf31   | 0.230662165 | 0.1         | ANKRD40  | 8.548780472 | 8.659507762 |
| TMEM230   | 55.25814592 | 62.19421869 | ANKRD17  | 10.95166476 | 10.10947638 |
| TMEM231   | 2.347561851 | 2.868587039 | ANKRD16  | 1.7605431   | 1.892602399 |
| C8orf37   | 0.931713299 | 1.441680484 | CD151    | 175.204982  | 159.6360459 |
| TMEM234   | 7.089357767 | 6.429760645 | ANKRD11  | 9.193273296 | 8.811059384 |
| TMEM237   | 3.21224567  | 3.987192664 | ANKRD12  | 1.918592449 | 1.604568948 |
| TMEM238   | 2.218858729 | 3.462009019 | ANKRD10  | 14.61432594 | 16.08122458 |
| LOC730183 | 1.438950438 | 1.948334741 | ANKRD28  | 14.36034275 | 12.79162762 |
| TMEM239   | 2.249196908 | 1.687482147 | CD164    | 71.38276115 | 59.34100446 |
| MANSC1    | 2.158148108 | 1.731045182 | ANKRD29  | 2.521651433 | 2.49790784  |
| IL7R      | 3.115432816 | 3.236876226 | ANKRD26  | 1.232329489 | 1.134885194 |
| MXD1      | 1.367104316 | 1.334931293 | ANKRD27  | 11.24158309 | 12.04543775 |
| MXD3      | 53.69061103 | 67.86443655 | ANKRD22  | 0.1         | 0.109306113 |
| MXD4      | 18.97902614 | 18.29311261 | ANKRD23  | 0.220723339 | 0.444794728 |
| RERE      | 33.5633683  | 31.22759173 | FAM103A1 | 5.751188526 | 7.485797718 |
| PHTF2     | 10.58220456 | 10.99846298 | LSM1     | 59.79250946 | 64.86302742 |
| PHTF1     | 9.095044186 | 8.814116764 | ASNS     | 40.39144434 | 35.80923337 |
| RERG      | 0.412824894 | 0.16381792  | LSM5     | 10.76067245 | 12.84841213 |
| TMEM222   | 41.46497903 | 36.03434858 | LSM4     | 55.12565391 | 67.27601052 |
| TMEM223   | 14.40462055 | 18.42934785 | LSM3     | 72.9065378  | 114.2112623 |
| GET4      | 38.21750782 | 34.70700944 | LSM2     | 18.65683871 | 20.88116355 |
| SNTA1     | 8.580934959 | 7.709059728 | CNOT4    | 8.051305675 | 6.836371177 |
| C8orf59   | 38.14812571 | 54.50477706 | LSM8     | 2.095891711 | 2.686518137 |
| TMEM211   | 0.1         | 0.1         | CNOT6    | 6.699216264 | 8.503686295 |
| TMEM213   | 0.1         | 0.1         | LSM7     | 104.1024603 | 135.6363764 |
| C8orf58   | 10.35420452 | 9.544440951 | CNOT7    | 48.22858789 | 64.27583667 |
| RER1      | 72.51693154 | 67.90268285 | LSM6     | 12.70825146 | 14.99422682 |
| TMEM214   | 35.85403411 | 27.11234032 | CNOT1    | 19.21811801 | 19.47530776 |
| SETBP1    | 0.93700146  | 0.972323532 | CNOT2    | 28.04521987 | 26.82002849 |
| TMEM216   | 1.571820251 | 1.264518234 | CNOT3    | 25.49609544 | 25.78057658 |
| TMEM217   | 0.947450391 | 0.393379466 | CYT8     | 3446.32279  | 4608.489346 |
| TMEM218   | 2.934166109 | 3.361323426 | CNOT8    | 25.08180617 | 25.18300645 |
| TMEM219   | 34.5759952  | 29.61986035 | EIF4G3   | 15.60962912 | 15.45578913 |
| C8orf82   | 42.82804302 | 48.33009598 | EIF4G2   | 130.7907372 | 137.8678068 |
| C8orf88   | 19.68656881 | 27.541933   | EIF4G1   | 138.4412378 | 140.7555294 |
| TMEM201   | 12.91828283 | 14.75917394 | EIF4E3   | 0.1         | 0.111948515 |
| TMEM203   | 23.28955523 | 28.18864606 | NAGPA    | 8.811619563 | 9.292337152 |
| PABPN1    | 20.53215922 | 22.16277775 | SGCE     | 28.75842011 | 26.63231975 |
| MKKN1     | 6.585331142 | 6.323195646 | SGCA     | 0.82507016  | 0.643599086 |
| TMEM205   | 25.69452873 | 24.70531949 | SGCB     | 12.95125667 | 12.56736225 |

|          |             |             |          |             |             |
|----------|-------------|-------------|----------|-------------|-------------|
| TMEM206  | 3.651596021 | 5.014408626 | WASH1    | 4.059269884 | 3.573160905 |
| MXI1     | 1.222866217 | 1.446935141 | HIAT1    | 27.15313326 | 22.1632082  |
| MKMK2    | 19.75501417 | 19.6908159  | ASPM     | 9.00347932  | 11.46877595 |
| TMEM208  | 31.74703845 | 23.45724336 | ASPH     | 30.87158815 | 30.53907705 |
| TMEM209  | 7.022321391 | 8.234600718 | EIF4E2   | 15.68251602 | 17.1936141  |
| ZNF804A  | 0.188710825 | 0.210847028 | NLGN1    | 0.764890089 | 0.647452239 |
| C8orf76  | 18.64296697 | 17.56908571 | NLGN2    | 30.73850601 | 27.14217409 |
| REST     | 3.252641246 | 3.474036389 | WASF1    | 10.16757666 | 12.64520092 |
| KRAS     | 6.348336578 | 7.428509864 | WASF2    | 39.32179668 | 36.94604466 |
| SUGT1    | 22.61415923 | 25.16867781 | WASF3    | 5.68847001  | 5.287351331 |
| SNTB1    | 1.177095287 | 0.842546311 | ASS1     | 3.220450078 | 3.050672309 |
| SNTB2    | 1.663163999 | 1.747617247 | RHEBL1   | 6.111562934 | 4.508376277 |
| PNMAL1   | 9.264565094 | 8.921908027 | FAAH     | 0.943123349 | 0.560357194 |
| EMC10    | 19.79026237 | 20.75260903 | NADSYN1  | 5.117899749 | 5.405700711 |
| NYNRIN   | 0.139672606 | 0.151932777 | CYP27A1  | 0.28125173  | 0.277948464 |
| OBFC1    | 3.497708073 | 3.630325548 | RRAGA    | 127.2422596 | 113.4931835 |
| REV1     | 3.678710248 | 3.818695512 | RRAGC    | 40.7980183  | 33.14950407 |
| GTPBP6   | 0.768183627 | 0.517458462 | RRAGB    | 4.548931286 | 4.318684055 |
| GTPBP8   | 3.335508437 | 3.565318697 | CD109    | 12.96821087 | 11.43203806 |
| SCRIB    | 42.02541728 | 48.83852114 | RRAGD    | 0.595678039 | 0.627119698 |
| GTPBP2   | 37.08051904 | 26.51702846 | VDAC3    | 178.9776923 | 211.9395374 |
| GTPBP1   | 17.20779123 | 11.74199707 | VDAC2    | 23.85755413 | 29.38988944 |
| GTPBP4   | 41.50415638 | 52.02004268 | VDAC1    | 130.4491922 | 154.4628493 |
| GTPBP3   | 6.165475258 | 9.930366499 | EIF5A2   | 3.224395021 | 2.706037681 |
| PLEKHS1  | 0.869313335 | 1.037047752 | CD99L2   | 40.74545835 | 41.58207422 |
| CTBP2    | 21.11227996 | 22.06611608 | DGUOK    | 30.98012967 | 32.13587079 |
| CTBP1    | 32.97567914 | 33.95948792 | CYP27B1  | 8.18409497  | 6.349479544 |
| XPA      | 2.514206401 | 3.656675933 | NUAK1    | 4.692672631 | 3.558714219 |
| XPC      | 20.6096549  | 19.49942149 | NUAK2    | 3.139783628 | 2.139579263 |
| SETD1B   | 2.292808033 | 2.196305323 | ASUN     | 14.25742125 | 21.85044354 |
| SETD1A   | 6.167831792 | 6.509632561 | FADD     | 21.01508506 | 21.45967367 |
| PCDHB2   | 5.250180666 | 4.111625758 | ZRSR2    | 7.727766857 | 6.920223675 |
| MMS19    | 18.53523339 | 20.48870881 | SIAH2    | 14.21805695 | 13.1254324  |
| PCDHB9   | 1.041999583 | 0.78101257  | SIAH1    | 6.716333557 | 6.14509034  |
| KRI1     | 11.78687628 | 15.04876381 | ACADSB   | 0.738350988 | 0.880469748 |
| FAM211B  | 0.984941592 | 1.140718089 | UBAC1    | 31.37650526 | 39.0617889  |
| FAM211A  | 0.376434606 | 0.218427632 | UBAC2    | 24.13688372 | 26.30341346 |
| PLEKHN1  | 0.57542766  | 0.578335753 | CYP27C1  | 4.846029145 | 4.225092973 |
| TERF1    | 13.75429944 | 15.36473746 | STAG1    | 6.142263486 | 5.955992046 |
| TERF2    | 7.278279488 | 8.700286771 | STAG2    | 17.55923736 | 17.57846662 |
| FAM210B  | 5.339647579 | 5.748485423 | ALDH18A1 | 51.00927429 | 48.68379186 |
| FAM210A  | 3.915764413 | 5.743660775 | CLIC4    | 52.14500955 | 44.82381876 |
| TAF6L    | 9.454176053 | 11.30187721 | CLIC3    | 0.1         | 0.1         |
| AEBP2    | 4.239580551 | 4.019136285 | FASTKD1  | 2.184943454 | 4.160057989 |
| PLEKHO1  | 24.90150746 | 25.45725044 | FASTKD2  | 3.727986945 | 3.828110582 |
| PLEKHO2  | 2.389709601 | 2.063867438 | FASTKD3  | 4.406178888 | 7.406196046 |
| CDC123   | 60.34066032 | 84.85585643 | FAF1     | 34.13080164 | 37.99837574 |
| NDUFA4L2 | 1.411900934 | 0.911825186 | FAF2     | 36.57520443 | 33.92429283 |
| FAM214B  | 26.72155458 | 18.36102483 | CLIC2    | 0.389261008 | 0.292768495 |
| FAM214A  | 1.853769223 | 1.793258116 | CLIC1    | 243.7548192 | 229.0138063 |

|          |             |             |          |             |             |
|----------|-------------|-------------|----------|-------------|-------------|
| FAM213B  | 8.731000417 | 10.11765393 | PRMT6    | 9.059144746 | 10.03843698 |
| TAF9B    | 23.46292849 | 25.33863274 | MAP4K1   | 0.173899398 | 0.218722438 |
| YTHDF1   | 24.48659697 | 23.5903112  | MAP4K2   | 5.325469131 | 5.251298872 |
| YTHDF2   | 45.37910317 | 52.34701183 | PRMT5    | 50.2639624  | 63.35576273 |
| YTHDF3   | 33.29951686 | 31.49489304 | MANBA    | 10.07916405 | 9.051446322 |
| FAM213A  | 0.1         | 0.133508732 | PRMT7    | 7.441132666 | 8.521921836 |
| MKLN1    | 4.041927191 | 3.702303299 | PRMT2    | 12.1069602  | 11.43012892 |
| FAM212B  | 0.19556255  | 0.118609113 | PRMT1    | 81.0173994  | 119.961841  |
| FAM212A  | 3.446861113 | 2.311382983 | PRMT3    | 4.757176311 | 6.899918497 |
| TMEM39A  | 8.413446674 | 7.314807929 | NAALADL2 | 0.204006561 | 0.189115114 |
| TMEM39B  | 17.34888794 | 16.88660769 | FASTKD5  | 8.973270849 | 10.29668487 |
| SCRG1    | 0.1         | 0.1         | SGK3     | 1.122983301 | 0.946633464 |
| MTFMT    | 2.275672561 | 2.301875123 | UMPS     | 5.616546305 | 7.256238874 |
| TXNL4B   | 3.003219729 | 4.026930618 | SGK1     | 26.00260483 | 17.40134024 |
| PLXND1   | 0.308490147 | 0.429631404 | PRMT9    | 2.878311987 | 2.557164456 |
| CEP120   | 5.249914317 | 4.170830803 | RGAG1    | 1.813836819 | 1.904802777 |
| CDC14A   | 1.255824663 | 1.185894794 | MPZL3    | 0.1         | 0.1         |
| CDC14B   | 8.837555977 | 7.141851908 | MAP4K5   | 10.75967577 | 11.98518831 |
| FAM216A  | 14.37720827 | 21.87849467 | MPZL1    | 32.63954235 | 34.15851585 |
| CEP128   | 2.36128511  | 3.079517947 | MAP4K3   | 3.351421049 | 3.305983642 |
| SALL2    | 1.301664632 | 1.276066285 | MAP4K4   | 41.77796465 | 34.88336614 |
| TXNL4A   | 32.23712736 | 43.39881401 | MPZL2    | 0.1         | 0.112965455 |
| PLEKHJ1  | 25.26274511 | 23.97640141 | STAC3    | 1.166632498 | 0.794395623 |
| TLE4     | 25.88123244 | 22.16714933 | TOMM7    | 100.868138  | 118.0489725 |
| RARS2    | 17.18482134 | 19.54080741 | TOMM5    | 82.69508423 | 119.562028  |
| TLE3     | 0.597357743 | 0.900639966 | TOMM6    | 103.9417211 | 151.126248  |
| TLE2     | 7.340529175 | 6.257220189 | ARID4A   | 2.817554324 | 2.518016627 |
| TLE1     | 10.15422557 | 8.469038005 | ARID4B   | 4.064635114 | 4.178096067 |
| SNRPN    | 0.1         | 0.1         | MANEA    | 2.215866567 | 2.824203278 |
| CEP135   | 1.177977674 | 1.328926168 | PTTG1    | 93.51564502 | 131.189058  |
| HARBI1   | 3.188522355 | 2.742153171 | UNC5CL   | 0.1         | 0.111858749 |
| SPICE1   | 2.369530822 | 2.292423184 | ARID5A   | 1.990295851 | 2.071480623 |
| VRK1     | 9.267872407 | 11.95130799 | ARID5B   | 4.960823422 | 3.944414905 |
| VRK2     | 3.280690427 | 2.935128347 | CGRRF1   | 4.105313871 | 5.034673656 |
| VRK3     | 13.82046546 | 11.37091972 | DNAJC30  | 9.551278092 | 7.755978259 |
| ILF2     | 85.9858729  | 102.5468472 | STAM2    | 5.111963223 | 4.023483986 |
| TLE6     | 0.125756706 | 0.191953808 | FAIM     | 2.37350461  | 2.135212253 |
| ILF3     | 66.92966099 | 81.60899119 | DNAJC22  | 0.194900558 | 0.206481166 |
| LTB4R2   | 0.832646214 | 0.575566233 | DNAJC24  | 1.087074263 | 1.36120165  |
| SNRPG    | 69.39848598 | 104.479758  | DNAJC25  | 4.61930502  | 4.940300215 |
| SNRPE    | 23.13721784 | 35.06011266 | DNAJC27  | 0.788709054 | 0.81927746  |
| SNRPF    | 44.25530981 | 62.26664167 | DNAJC28  | 0.477721812 | 0.20373089  |
| SNRPC    | 116.2540055 | 146.0077843 | DNAJC21  | 8.610703718 | 8.770044317 |
| SNRPA    | 66.65759058 | 73.78736755 | SOHLH2   | 0.52641267  | 0.505955307 |
| SNRPB    | 248.6821293 | 297.4324231 | STAP2    | 0.204058642 | 0.155724837 |
| CEP104   | 5.843761499 | 5.66010419  | ASIC3    | 0.167352563 | 0.276333547 |
| FAM114A1 | 19.91128929 | 14.37112435 | ASIC1    | 1.960048224 | 2.951254135 |
| FAM114A2 | 4.035875155 | 3.137709251 | DNAJC19  | 6.230675932 | 10.22119132 |
| FAM218A  | 0.816898946 | 0.901943795 | EPHX2    | 0.1         | 0.1         |
| KIAA0556 | 3.99273435  | 3.498353289 | EPHX1    | 65.20206395 | 43.9735146  |

|              |             |             |         |             |             |
|--------------|-------------|-------------|---------|-------------|-------------|
| DDR GK1      | 60.62696624 | 57.9302192  | DNAJC11 | 40.88167354 | 47.38858476 |
| PLXNA2       | 1.348392273 | 0.955720017 | EPHX4   | 0.1         | 0.1         |
| PLXNA1       | 9.551898266 | 8.499446221 | EPHX3   | 0.128702363 | 0.222964087 |
| PLXNA3       | 10.25635154 | 6.626639428 | DNAJC13 | 11.15916746 | 10.27445456 |
| CEP112       | 1.597324174 | 1.672230835 | DNAJC14 | 15.40456538 | 15.43893899 |
| SEC16A       | 13.65989502 | 10.93867917 | DNAJC15 | 5.920189892 | 6.794588348 |
| FAM217B      | 2.899887904 | 3.398986022 | DNAJC16 | 3.209323928 | 2.750003934 |
| LRFN3        | 11.89490225 | 10.42442001 | DNAJC17 | 5.849749558 | 7.257248518 |
| LRFN5        | 1.561651683 | 0.765945641 | DNAJC18 | 1.905692465 | 2.161533131 |
| LRFN4        | 54.29126479 | 60.93560639 | DNAJC10 | 13.88111478 | 13.11415272 |
| LRFN1        | 0.602649684 | 0.702027666 | ACADVL  | 66.97849676 | 65.0655769  |
| PLEKHM1      | 6.51180131  | 4.860149651 | MCTP1   | 2.914571381 | 2.837791787 |
| PLXNB3       | 0.955399731 | 0.542081955 | SGSH    | 19.75064559 | 14.8679809  |
| PLEKHM2      | 53.77200285 | 39.93026394 | NETO1   | 4.605830028 | 4.425925804 |
| PLXNB2       | 21.96790034 | 18.04676135 | ENOSF1  | 8.758546163 | 9.442387435 |
| PLXNB1       | 1.79507098  | 1.627073117 | HIBCH   | 2.832867587 | 4.193940981 |
| PLEKHM3      | 0.492005149 | 0.519848317 | ARID1A  | 28.0816779  | 24.47369731 |
| PLEKHF2      | 5.654318651 | 5.291932196 | ARID1B  | 10.01267881 | 8.478709251 |
| PLEKHF1      | 29.34033622 | 22.23119403 | LATS1   | 2.277019056 | 2.093620212 |
| CEP164       | 5.14872826  | 5.93229318  | LATS2   | 10.20913578 | 7.065541328 |
| PIK3C2A      | 2.553425123 | 2.640096385 | EHHADH  | 1.054554045 | 1.014983208 |
| PIK3C2B      | 1.054663111 | 1.318262723 | FAN1    | 2.861670827 | 3.528043981 |
| SCRN1        | 50.13116723 | 47.66293294 | ATE1    | 2.235374008 | 2.681819019 |
| SCRN3        | 3.167288743 | 3.295219106 | SGTB    | 3.405903743 | 3.018283016 |
| SCRN2        | 2.536101319 | 1.960776057 | WTAP    | 58.25856286 | 50.09360871 |
| TLK2         | 5.961261912 | 5.434011436 | SGTA    | 63.00256128 | 72.79815634 |
| TLK1         | 3.980479327 | 4.586257794 | DTNBP1  | 12.77887968 | 10.79413164 |
| CEP170       | 11.2282256  | 11.16913379 | ARID3A  | 6.664124894 | 5.142148013 |
| RFC5         | 14.24753967 | 19.92851792 | ARID3B  | 1.376294825 | 1.488644499 |
| PLEKHG3      | 0.364711236 | 0.390782593 | SH3YL1  | 1.207965623 | 1.24271128  |
| PLEKHG4      | 3.162246372 | 3.153466567 | LTBR    | 92.93885608 | 73.48691518 |
| PLEKHG1      | 0.1         | 0.1         | ATF1    | 9.826606348 | 9.72523274  |
| RFC3         | 22.63465336 | 34.66748457 | ATF2    | 9.133979152 | 8.049351389 |
| RFC4         | 23.12182708 | 27.88866894 | ENDOV   | 1.18692388  | 0.652466305 |
| PLEKHG2      | 9.702142162 | 8.326351825 | SUPT20H | 29.32983866 | 30.37129914 |
| RFC1         | 17.74583076 | 18.49186153 | ATG3    | 27.5526846  | 35.30309104 |
| RFC2         | 28.43961859 | 33.19539095 | ENDOG   | 20.29067096 | 23.81434903 |
| PLEKHG5      | 0.641877533 | 0.592431563 | CD2AP   | 4.198890478 | 4.047937863 |
| PLEKHG6      | 0.348808798 | 0.289497656 | ATF7    | 6.617213125 | 5.940334477 |
| FAM219B      | 4.810061647 | 5.119508278 | FAR1    | 5.772783988 | 7.596185998 |
| FAM219A      | 14.53392771 | 13.13046506 | FAR2    | 8.043245339 | 8.135610087 |
| MTFR1        | 20.47752247 | 24.97874372 | ATF5    | 31.29360191 | 22.03039714 |
| MTFR2        | 10.4728707  | 13.15433288 | ATF6    | 10.07580179 | 8.658301525 |
| PLEKHH2      | 0.159765634 | 0.1266711   | ATF3    | 14.18147306 | 9.051084925 |
| PLEKHH3      | 9.516381032 | 9.621885896 | ATF4    | 216.6921191 | 233.286917  |
| MTFP1        | 32.0106044  | 40.47401029 | EPB41L5 | 1.548720771 | 1.338080102 |
| P2RY6        | 0.786407963 | 0.56210173  | EPB41L1 | 1.344293265 | 1.278790816 |
| LOC101928083 | 0.776705914 | 0.391921525 | EPB41L2 | 14.38146978 | 15.98207281 |
| P2RY2        | 0.129734018 | 0.104246127 | PIP5K1A | 28.25298128 | 31.90744186 |

|          |             |             |                  |             |             |
|----------|-------------|-------------|------------------|-------------|-------------|
| RFFL     | 3.454901886 | 3.435902053 | PIP5K1C          | 11.6719885  | 9.618062316 |
| SEC11A   | 52.05127698 | 57.46012994 | ATG7             | 20.25927596 | 18.26887094 |
| PLEKHH1  | 0.153724175 | 0.132880041 | ATG5             | 19.58373007 | 19.31580688 |
| SEC11C   | 15.97769207 | 20.25987292 | VANGL1           | 16.89106398 | 16.02859604 |
| KRR1     | 14.98743773 | 19.33769536 | VANGL2           | 0.1         | 0.1         |
| CEP152   | 1.463386857 | 1.983340169 | QARS             | 66.30518991 | 71.73736878 |
| TPRKB    | 14.72419602 | 18.03656616 | FASN             | 73.3587941  | 74.58655927 |
| GFER     | 7.583226696 | 10.13959998 | FAT1             | 11.83261014 | 8.48719558  |
| P2RX7    | 0.1         | 0.1         | FAT4             | 1.062464451 | 0.751633233 |
| P2RX6    | 0.958856526 | 0.57696393  | BHLHE41          | 1.35067889  | 1.405165106 |
| P2RX5    | 0.77498411  | 2.075999324 | SMPD2            | 6.28467583  | 7.364274209 |
| P2RX4    | 5.079915278 | 3.40559766  | SMPD5            | 0.131504716 | 0.122494946 |
| KIAA0586 | 5.177635485 | 5.526554438 | SMPD4            | 17.27257761 | 18.34129971 |
| GFI1     | 0.166116802 | 0.194417222 | ATIC             | 35.22399292 | 38.54796786 |
| DZIP1L   | 0.901992269 | 0.884725071 | SMPD1            | 33.83050143 | 22.21844698 |
| IL15RA   | 0.857798205 | 0.881562658 | ENOPH1           | 20.22015692 | 21.46506095 |
| KRT4     | 0.1         | 0.1         | XRCC6BP1         | 12.37124991 | 15.03359966 |
| KRT8     | 0.897391693 | 0.634846117 | ATL3             | 10.19094165 | 9.789819943 |
| FLT3LG   | 12.58332401 | 6.265606663 | FAXC             | 0.195811781 | 0.274829062 |
| KRT7     | 6.308878158 | 4.180162118 | ATL1             | 4.195590727 | 3.485369569 |
| KRT5     | 0.235348529 | 0.277175783 | ATL2             | 7.303457942 | 9.043130325 |
| KRT9     | 0.1         | 0.1         | CNPY4            | 11.12639348 | 10.16841653 |
| TLN2     | 3.721348309 | 3.161625222 | FPGT-TNNI3K      | 0.677583308 | 0.646158096 |
| TLN1     | 66.39076972 | 54.63117086 | C4orf3           | 17.03681834 | 14.98779372 |
| SPTBN4   | 0.147842778 | 0.121350389 | WTIP             | 10.80139734 | 8.633004651 |
| FUT10    | 3.847401213 | 4.531650171 | LOC10192921<br>1 | 5.427749795 | 4.638810826 |
| FUT11    | 8.472313232 | 7.389395373 | ATN1             | 65.83012635 | 59.13010954 |
| HTATSF1  | 41.61977677 | 44.60563702 | LTN1             | 2.879755021 | 3.055672343 |
| SPTBN1   | 24.20771027 | 20.63407614 | LOC10192922<br>0 | 0.501555764 | 0.27919887  |
| SPTBN2   | 0.135548283 | 0.245040728 | HHAT             | 0.549065603 | 0.37054092  |
| SETDB1   | 10.58475317 | 10.80734593 | EIF1AX           | 15.59979421 | 20.19999842 |
| SETDB2   | 0.898490551 | 0.740669325 | CNPY2            | 90.27075161 | 94.68708822 |
| GFM1     | 24.48773902 | 27.03284614 | CNPY3            | 41.05511036 | 39.6577636  |
| GFM2     | 8.709685938 | 10.30172197 | SHC4             | 0.157014132 | 0.13256731  |
| LIMD1    | 5.316622497 | 5.058481793 | CD274            | 3.200727329 | 1.237178724 |
| LIMD2    | 4.239993235 | 3.884180053 | SHC2             | 1.099864192 | 0.665187777 |
| SH3PXD2A | 6.943690699 | 6.761082481 | SHC3             | 0.110436175 | 0.122354861 |
| SH3PXD2B | 6.5529939   | 6.811005762 | SHC1             | 227.5072499 | 188.5700358 |
| SOSTDC1  | 0.1         | 0.1         | ATP8             | 1499.910779 | 2913.694434 |
| PSENE1   | 81.9512925  | 83.18381584 | ATP6             | 6061.463748 | 9238.344892 |
| IZUMO4   | 0.734462434 | 0.419777295 | EIF1AD           | 11.99995062 | 12.57885795 |
| CBFA2T2  | 4.7868284   | 3.504014215 | EIF4EBP1         | 653.8151954 | 702.902741  |
| LIME1    | 3.956266598 | 4.864388316 | EIF4EBP2         | 10.48197741 | 11.24647431 |
| TLR1     | 0.242040402 | 0.188742024 | EIF4EBP3         | 13.03143218 | 13.62782905 |
| TLR9     | 0.140272308 | 0.138340223 | CD276            | 25.00201853 | 22.25641786 |
| TLR6     | 0.435112634 | 0.377057089 | SHBG             | 0.375708066 | 0.268737678 |
| TLR5     | 0.447700677 | 0.348264671 | MCMDC2           | 0.252917809 | 0.209186125 |
| VGLL2    | 0.542435797 | 0.947961665 | AKAP8L           | 32.33286184 | 33.40238714 |

|           |             |             |                  |             |             |
|-----------|-------------|-------------|------------------|-------------|-------------|
| VGLL1     | 0.1         | 0.1         | LOC10192926<br>4 | 1.841931837 | 1.807995845 |
| VGLL4     | 13.27847227 | 12.28958435 | HHEX             | 1.665331256 | 2.714938377 |
| TLR3      | 4.746743616 | 1.466177774 | UNKL             | 1.875860459 | 2.082558834 |
| VGLL3     | 0.75056148  | 0.592665142 | ATRX             | 3.61512041  | 3.609217558 |
| TLR2      | 0.1         | 0.121800862 | ATRN             | 5.598251844 | 5.388758066 |
| RFNG      | 14.82142313 | 14.06104285 | TMBIM4           | 13.43148096 | 11.95235464 |
| LIMA1     | 31.69293107 | 25.72184587 | TMBIM1           | 59.69787498 | 48.61686114 |
| KIAA0513  | 2.733659692 | 1.818206359 | TMBIM6           | 165.9641108 | 160.3208069 |
| APBB2     | 3.196817068 | 2.579832836 | PRPS2            | 17.38300356 | 22.48793573 |
| APBB1     | 14.63734215 | 13.46861334 | PRPS1            | 32.22015409 | 39.12113585 |
| APBB3     | 8.670275534 | 7.852302569 | PCDH1            | 2.190852215 | 1.090193348 |
| SORBS2    | 0.349483533 | 0.246700092 | PCDH9            | 2.627900582 | 2.184945907 |
| SORBS1    | 0.118452975 | 0.113175764 | PCDH7            | 3.99985916  | 3.436468058 |
| SORBS3    | 79.28756658 | 68.89867669 | PCDH8            | 0.333605542 | 0.183399324 |
| APBA1     | 0.123671603 | 0.111267973 | LTV1             | 28.96818478 | 37.37820559 |
| APBA3     | 10.45845313 | 9.280278992 | HHIP             | 1.50918459  | 0.836923263 |
| APBA2     | 0.1         | 0.1         | NUDT1            | 31.23110872 | 36.06151988 |
| RASEF     | 0.761502989 | 0.911601197 | NUDT2            | 13.96978278 | 15.17920988 |
| HOXA13    | 0.347977456 | 0.336080612 | LOC10192918<br>5 | 0.330382603 | 0.387870469 |
| HOXA11    | 0.452477567 | 0.869008345 | NUDT5            | 42.34277422 | 51.45878323 |
| HOXA10    | 1.97921772  | 2.480605764 | NUDT6            | 33.38614752 | 27.57951061 |
| HCFC1R1   | 63.26861738 | 62.29270647 | NUDT3            | 10.57264891 | 10.34888898 |
| COTL1     | 223.9653145 | 218.4570029 | IL27RA           | 0.663631512 | 0.932641216 |
| TMEM38A   | 1.272786607 | 1.163713124 | NUDT4            | 13.1175026  | 10.82825251 |
| TMEM38B   | 2.035525984 | 2.623198997 | MFSD2A           | 3.151814734 | 2.748386017 |
| ANXA11    | 175.1142466 | 153.7292566 | MFSD11           | 13.70708382 | 14.08201496 |
| NOSIP     | 43.8044393  | 39.82630525 | MFSD12           | 71.68812968 | 53.47390093 |
| LZTFL1    | 4.080620164 | 3.778689743 | MFSD10           | 73.90316683 | 66.84677681 |
| MYCL      | 0.415377509 | 0.376363821 | FBF1             | 2.171594162 | 1.915328174 |
| MYCN      | 0.119942909 | 0.114239603 | BSDC1            | 18.07545252 | 14.74910578 |
| EFNA5     | 1.648313597 | 1.63660932  | ALDH6A1          | 0.871235452 | 0.91836614  |
| EFNA4     | 5.30752657  | 6.887317598 | KIAA1919         | 1.160230142 | 1.159833319 |
| EFNB2     | 12.78288526 | 13.15525247 | DHRS12           | 1.343028443 | 1.196379296 |
| EFNB1     | 3.266049002 | 4.76600289  | DHRS13           | 1.668544542 | 1.760644608 |
| EFNB3     | 11.52637592 | 9.226616841 | DHRS11           | 4.261303788 | 5.624663047 |
| EFNA1     | 10.87175505 | 11.6368465  | SH3RF1           | 6.267055671 | 4.933162012 |
| EFNA3     | 1.411900934 | 2.139970979 | WFDC2            | 0.1         | 0.231074792 |
| EFNA2     | 0.124242313 | 0.134618914 | WFDC3            | 0.411707662 | 0.545129994 |
| TLX3      | 0.1         | 0.1         | AKAP12           | 2.271497512 | 2.087712351 |
| TLX2      | 1.910569597 | 1.703047144 | AKAP13           | 4.277256706 | 3.25229267  |
| TLX1      | 0.1         | 0.1         | AKAP10           | 9.630772203 | 8.909982121 |
| PI4KA     | 19.70483616 | 16.13092075 | AKAP11           | 2.912281828 | 3.027896383 |
| PI4KB     | 35.06415042 | 33.89574349 | ZADH2            | 5.082406363 | 5.33841182  |
| DYNLRB1   | 250.6461862 | 235.0982217 | PNPLA8           | 5.723867398 | 4.787346786 |
| LOC730268 | 0.656372444 | 0.662785207 | PCDHB14          | 0.608466768 | 0.488092862 |
| H2AFJ     | 21.43586668 | 20.18972294 | SH3RF3           | 3.592444975 | 2.957467865 |
| H2AFY     | 42.20915222 | 49.34626258 | NUDT9            | 5.671479278 | 5.553474715 |
| H2AFZ     | 258.889654  | 318.5516159 | SH3RF2           | 2.04738765  | 2.246578972 |

|         |             |             |          |             |             |
|---------|-------------|-------------|----------|-------------|-------------|
| AKTIP   | 3.303116537 | 2.837823246 | NUDT7    | 1.257330428 | 1.079383925 |
| H2AFX   | 57.98297861 | 72.79898063 | NUDT8    | 2.582965444 | 3.463931736 |
| H2AFV   | 28.83576625 | 34.991237   | MIS18A   | 3.539167922 | 4.043173616 |
| RASA3   | 22.99530188 | 20.76652121 | PNPLA3   | 1.896532573 | 2.295234077 |
| RASA4   | 0.127801254 | 0.106616869 | CCNYL1   | 4.231231866 | 4.016591482 |
| RASA1   | 24.79640048 | 25.83587498 | PNPLA4   | 0.245981811 | 0.269379754 |
| RFT1    | 6.98609083  | 8.406183877 | PNPLA6   | 24.2522884  | 22.65824976 |
| RASA2   | 1.852928898 | 1.964260172 | KIAA1958 | 0.670296297 | 0.662326617 |
| MYH9    | 346.7994946 | 301.4598268 | PNPLA2   | 21.95846236 | 18.01332109 |
| BRAT1   | 23.17385545 | 24.81830473 | ZFAND4   | 0.290347521 | 0.294159467 |
| RASD2   | 0.1         | 0.12495403  | UBE3C    | 32.7588128  | 32.95565114 |
| RASD1   | 0.218881641 | 0.248546432 | ZFAND3   | 32.71368408 | 25.72323476 |
| TMEM30A | 25.85841264 | 25.20223613 | UBE3D    | 2.480745917 | 3.19623973  |
| TMEM30B | 0.111692837 | 0.1         | ZFAND6   | 14.16178445 | 14.25058599 |
| LIMK2   | 1.544591122 | 1.921932798 | ZFAND5   | 16.93901309 | 17.57243955 |
| LIMK1   | 13.11086091 | 15.48826586 | UBE3A    | 7.368864354 | 7.53356643  |
| ANXA2R  | 3.87529027  | 3.030028924 | UBE3B    | 9.922264414 | 7.700945959 |
| KISS1   | 0.1         | 0.1         | ZFAND1   | 12.68564633 | 17.19439716 |
| GHITM   | 74.0282157  | 80.54390223 | UBE2Z    | 49.44207976 | 43.00867079 |
| MYLK    | 0.133149105 | 0.142604326 | UBE4A    | 8.340313515 | 8.556356094 |
| XYLB    | 2.723659386 | 2.154632066 | UBE4B    | 9.986646077 | 10.06117149 |
| RFX2    | 1.451844999 | 1.362933673 | POU3F2   | 0.989794321 | 1.071146509 |
| RFX3    | 0.98581802  | 1.10243752  | SHQ1     | 9.03824639  | 9.516812551 |
| RFX1    | 3.613268902 | 3.464492568 | MAP7D3   | 23.07080298 | 25.57029998 |
| MYL5    | 4.127230773 | 3.263068433 | MAP7D1   | 75.94595395 | 68.00206609 |
| RFX8    | 5.478414447 | 7.008225279 | SHPK     | 7.247022992 | 8.972445166 |
| MYL6    | 1023.906191 | 889.3053951 | EHBP1L1  | 22.69357549 | 21.56695945 |
| RFX7    | 1.897896868 | 2.404529851 | MAP7D2   | 1.364051789 | 2.057027799 |
| MYL2    | 0.1         | 0.1         | SIDT2    | 6.038803798 | 4.709558287 |
| RFX5    | 23.67821364 | 24.06527534 | FBN2     | 10.37011443 | 9.3597056   |
| MYL9    | 16.85287628 | 7.134566183 | FBN3     | 0.1         | 0.1         |
| MYNN    | 4.465572185 | 4.191624068 | DHRS7B   | 6.929010879 | 6.104378881 |
| GABARAP | 487.2668459 | 436.8391525 | MFAP3L   | 0.108306888 | 0.105931271 |
| HSD11B2 | 0.127574988 | 0.1         | UBE2F    | 15.69665235 | 16.80444446 |
| MYO6    | 1.875291848 | 1.735877566 | TFAP2A   | 21.0278516  | 20.079027   |
| TMA7    | 120.2723923 | 159.7731602 | UBE2H    | 52.5041649  | 50.45234839 |
| SNUPN   | 11.39500864 | 11.27145437 | TFAP2C   | 16.92162772 | 13.94883385 |
| IL22RA1 | 0.819109506 | 0.187663458 | UBE2I    | 25.7474409  | 30.4612035  |
| LYPD6B  | 0.265134383 | 0.123581797 | UBE2B    | 19.74710019 | 20.28960318 |
| NOSTRIN | 0.24743179  | 0.284220761 | TFAP2E   | 2.734349815 | 3.353576933 |
| EFCAB4A | 1.452897838 | 1.949188344 | UBE2C    | 191.8570246 | 242.0275663 |
| MYPN    | 2.663189944 | 2.766465139 | UBE2A    | 47.1825737  | 44.32462091 |
| B3GALT1 | 0.483404258 | 0.510636526 | UBE2W    | 4.245538711 | 4.186979888 |
| MYOF    | 127.9304129 | 95.04983438 | UBE2S    | 487.5957779 | 578.9371775 |
| TMC8    | 0.111756342 | 0.108394244 | CCPG1    | 3.463751747 | 2.878530433 |
| TMC7    | 2.571120976 | 2.416839452 | UBE2T    | 38.37687698 | 49.94017922 |
| TMC6    | 0.20623983  | 0.112642865 | BHLHE40  | 22.45531062 | 21.72094892 |
| TMC5    | 0.6388479   | 0.454571041 | UBE2N    | 36.6409648  | 44.25833732 |
| TMC4    | 0.2034886   | 0.306899732 | UBE2O    | 5.901468465 | 6.251189461 |
| TMF1    | 8.581070511 | 7.4498108   | UBE2K    | 12.25333019 | 14.95888334 |



|            |             |             |                     |             |             |
|------------|-------------|-------------|---------------------|-------------|-------------|
| MYRF       | 0.178846795 | 0.18757476  | UBE2M               | 147.4316398 | 174.8855691 |
| OVCA2      | 38.72548474 | 42.1584412  | FBN1                | 25.22496131 | 16.60285991 |
| GGA2       | 9.800506802 | 9.389259411 | RASGEF1A            | 0.1         | 0.106537569 |
| GGA1       | 13.27673298 | 14.0271733  | MAN1A2              | 2.978550323 | 3.327905807 |
| GGA3       | 7.432039829 | 7.674153635 | RASGEF1B            | 0.1         | 0.1         |
| TCOF1      | 23.38291836 | 31.50571941 | RASGEF1C            | 0.164723352 | 0.1         |
| ATRNL1     | 1.010277757 | 0.660745526 | DACT3               | 1.52985166  | 1.291097079 |
| BYSL       | 21.71590821 | 29.88717465 | MAN1A1              | 19.47709257 | 18.39988703 |
| RPL22L1    | 3.858064865 | 6.373694941 | DACT1               | 2.185046072 | 2.482017921 |
| ZC3HAV1L   | 2.352308642 | 3.337539889 | MAN1B1              | 44.3499203  | 36.04638607 |
| YY1        | 26.21542508 | 26.76693618 | FBP1                | 0.132550925 | 0.146483918 |
| YY2        | 2.071153887 | 2.211160133 | FBP2                | 0.138482427 | 0.1         |
| KIAA0895   | 2.019812027 | 2.650483542 | RAP1GDS1            | 16.85535734 | 15.25919527 |
| ZFP69B     | 1.869390701 | 2.082800746 | FBRS                | 19.57941869 | 18.05985776 |
| SAP30      | 33.64113103 | 33.24726662 | ARFGEF1             | 12.16307547 | 10.96512173 |
| SAP25      | 0.244980308 | 0.41055581  | ARFGEF2             | 10.20707316 | 8.578314294 |
| TACSTD2    | 0.275511071 | 0.225318129 | SLC50A1             | 42.47580702 | 40.99805855 |
| B3GALT4    | 0.985883282 | 0.74353758  | TNFAIP8L2-<br>SCNM1 | 6.953941572 | 6.955184714 |
| B3GALT6    | 28.72621384 | 32.50593107 | CDK5RAP1            | 14.24635711 | 18.28136596 |
| B3GALT5    | 0.491145823 | 0.442759236 | CDK5RAP3            | 9.544069864 | 8.862401459 |
| LY75-CD302 | 0.583457337 | 0.71553275  | CDK5RAP2            | 11.51671208 | 12.11763541 |
| GGCT       | 17.64992718 | 22.23181343 | MAP1S               | 16.51317817 | 12.84970425 |
| B3GALTL    | 6.385919634 | 6.075548952 | ZC2HC1C             | 0.230334363 | 0.239591694 |
| TMIE       | 0.122163514 | 0.115825156 | ZC2HC1A             | 6.270056533 | 5.638996275 |
| RGCC       | 1.553510457 | 0.669134319 | MAP1B               | 11.26742117 | 8.569199807 |
| GGCX       | 10.2786072  | 10.46966371 | MAP1A               | 1.174820004 | 0.849839366 |
| EFCAB14    | 17.7383909  | 15.53071001 | NAIF1               | 3.463531764 | 3.407690509 |
| EFCAB13    | 0.257786718 | 0.17510841  | HMOX1               | 170.9184126 | 112.0823885 |
| EFCAB11    | 1.182694206 | 1.285364115 | PROM1               | 0.134976174 | 0.116649087 |
| ATP7B      | 1.327996159 | 1.21137294  | HMOX2               | 29.99211569 | 33.98828239 |
| ATP7A      | 2.024798162 | 1.691800307 | PROM2               | 0.12195279  | 0.139186738 |
| EDIL3      | 54.75798216 | 46.39757169 | BARD1               | 2.515460753 | 2.538810054 |
| CTNBNL1    | 30.19021964 | 28.21084139 | IRF2BP1             | 23.127388   | 23.69194878 |
| KSR1       | 5.048078717 | 4.226079703 | IRF2BP2             | 57.37675637 | 54.71903173 |
| DDOST      | 159.9857974 | 175.1021104 | LOC10192930<br>4    | 0.655499475 | 0.49663683  |
| NT5C3A     | 10.51745502 | 12.645985   | LOC10193030<br>7    | 0.516394016 | 0.607180961 |
| NT5C3B     | 23.20348405 | 28.08964422 | NCOR2               | 15.47950189 | 14.1050685  |
| SNURF      | 0.1         | 0.1         | NCOR1               | 19.44514061 | 16.7760888  |
| SEC22B     | 34.89963458 | 29.43668132 | LOC10099690<br>9    | 0.736267936 | 0.599737695 |
| SEC22A     | 5.512541587 | 4.963384971 | SIAE                | 2.95578119  | 2.554222318 |
| SEC22C     | 9.427719727 | 9.953989486 | CSNK1A1             | 86.44321875 | 79.2809687  |
| FOCAD      | 5.981276639 | 6.021677389 | SYNJ2BP             | 1.991144219 | 1.970470702 |
| SEC23A     | 30.21399537 | 28.18301645 | SMOC2               | 0.1         | 0.1         |
| SAP18      | 67.67504215 | 68.13015265 | SMOC1               | 0.113890716 | 0.119836452 |
| ATP9B      | 0.123841798 | 0.108511741 | CYP20A1             | 0.907065438 | 0.757613839 |
| SEC23B     | 19.08772991 | 19.18225103 | NUCB1               | 135.7897254 | 109.6709026 |

|              |             |             |              |             |             |
|--------------|-------------|-------------|--------------|-------------|-------------|
| ATP9A        | 1.957360958 | 1.568106841 | NUCB2        | 15.90072517 | 13.63072175 |
| SEC24B       | 9.619809821 | 10.12289877 | OXNAD1       | 2.627084849 | 3.201003381 |
| SEC24A       | 10.68372127 | 9.195064684 | PROS1        | 3.190955865 | 3.540017645 |
| NICN1        | 3.271491033 | 2.801310521 | AUP1         | 38.85054266 | 44.36107182 |
| IMMT         | 46.0615596  | 49.38171961 | HID1         | 0.131089932 | 0.166596349 |
| ATOX1        | 165.8341351 | 157.0485272 | PROSC        | 26.61153138 | 27.75096466 |
| NOVA1        | 2.269180914 | 2.332399084 | LOC101930332 | 0.1         | 0.1         |
| RQCD1        | 19.12917879 | 20.68568599 | SNRNP35      | 5.617946326 | 5.862460786 |
| SEC24D       | 27.25112237 | 21.94049036 | PCDHAC2      | 0.642234998 | 0.425710869 |
| SEC24C       | 39.4320889  | 36.32088217 | CSNK1G3      | 10.23738034 | 11.56459799 |
| TMEM41A      | 7.083192519 | 7.316763847 | SUPT16H      | 63.27559215 | 70.97805023 |
| PLEKHB2      | 21.21773424 | 20.08673411 | HIC1         | 0.462029805 | 0.558242788 |
| TMEM41B      | 5.565802612 | 5.711274571 | HIC2         | 1.012870899 | 1.085061091 |
| ZAK          | 10.10119934 | 12.29604962 | SNRNP27      | 13.14201042 | 13.61692843 |
| PLEKHB1      | 0.776676297 | 0.614330876 | SNRNP25      | 13.30308697 | 20.04750741 |
| TMEM56-RWDD3 | 1.946691938 | 1.667359134 | CSNK1G2      | 31.02337915 | 31.44832653 |
| TMPO         | 38.71864837 | 47.31720937 | CSNK1G1      | 3.835807863 | 3.230942116 |
| TMEM194B     | 1.057034797 | 0.538561767 | BOLA2B       | 1.691392872 | 2.042678663 |
| TMEM194A     | 12.53057081 | 13.80311462 | EIF2B5       | 10.64083881 | 12.86151956 |
| IMP3         | 16.74621224 | 23.00317766 | EIF2B4       | 19.76111863 | 21.57772716 |
| IMP4         | 46.50031861 | 61.07671152 | EIF2B3       | 17.96385794 | 22.48093993 |
| ATP5S        | 2.811444519 | 3.216994131 | EIF2B2       | 51.78157534 | 65.91145381 |
| PLEKHD1      | 0.1         | 0.140942788 | M6PR         | 75.67837761 | 66.30860525 |
| PCDH10       | 1.281150911 | 0.977927526 | LOC100862671 | 0.866899803 | 0.859547212 |
| ATP5J        | 27.79933055 | 39.77014994 | CYR61        | 278.1242195 | 177.0529112 |
| ATP5I        | 106.5645347 | 137.8057402 | SNRNP70      | 103.6513493 | 120.7958907 |
| ATP5H        | 65.58199542 | 74.28833235 | PIP5KL1      | 1.365534823 | 1.309925321 |
| BRCC3        | 8.471800182 | 11.02941803 | EIF2B1       | 20.74160363 | 23.24914007 |
| PCDH19       | 0.520679672 | 0.328131403 | CATSPERG     | 0.1         | 0.117850898 |
| ATP5O        | 78.02691546 | 101.9478781 | CATSPER3     | 0.404030882 | 0.832657269 |
| PCDH18       | 3.873636611 | 2.964026376 | CATSPER2     | 0.233413654 | 0.34767548  |
| ATP5L        | 86.18748629 | 110.8491532 | SELENBP1     | 0.126478734 | 0.1         |
| ATP5B        | 452.8625669 | 543.6311761 | PPIL1        | 14.09723525 | 21.30581866 |
| ATP5E        | 403.7578719 | 457.9890353 | PPIL2        | 12.65551846 | 14.52252674 |
| ATP5D        | 107.2364688 | 127.2853188 | ANGPT1       | 0.698792957 | 0.766976709 |
| SEC31B       | 0.404138005 | 0.309117155 | SNRNP40      | 38.45565338 | 45.0972336  |
| PAG1         | 3.63973757  | 3.020746627 | SNRNP48      | 4.656474329 | 5.762349354 |
| SEC31A       | 83.70617692 | 71.85361221 | PPIL3        | 7.464909384 | 8.318656512 |
| XRCC6        | 151.5881774 | 178.4834006 | PPIL4        | 7.152580615 | 8.165858549 |
| XRCC4        | 6.58626073  | 6.610048009 | FCF1         | 9.013350686 | 11.53101734 |
| XRCC5        | 78.74236119 | 91.01965246 | RPL36AL      | 119.2187859 | 148.2195128 |
| XRCC2        | 1.367928986 | 1.99514614  | SIL1         | 34.36851453 | 31.15167757 |
| PCDH20       | 1.535238292 | 0.596866186 | SIK3         | 6.31646212  | 5.959743734 |
| EAF1         | 5.818344658 | 6.579907817 | SIK1         | 1.159779556 | 1.014348337 |
| XRCC3        | 11.81258019 | 14.65469738 | SIK2         | 4.599212863 | 4.030767125 |
| EAF2         | 1.622010068 | 2.056137669 | TP53BP2      | 24.49724826 | 23.30612275 |
| XRCC1        | 18.43865248 | 21.34708662 | TP53BP1      | 14.5457207  | 12.61541463 |

|         |             |             |          |             |             |
|---------|-------------|-------------|----------|-------------|-------------|
| PAF1    | 43.22251038 | 46.93361304 | KIAA1804 | 0.1         | 0.1         |
| RGL3    | 0.1         | 0.1         | CCR10    | 2.898018937 | 2.425840001 |
| RGL4    | 0.766272876 | 0.858598199 | PYCR1    | 60.17084512 | 57.72636026 |
| RGL1    | 2.152446303 | 2.131364469 | PYCR2    | 39.43747172 | 41.84402777 |
| RGL2    | 3.807474434 | 3.102385383 | CCSER2   | 14.25876962 | 12.59089269 |
| BARHL2  | 0.72508221  | 0.769480272 | SIM1     | 4.746650396 | 3.457396061 |
| BRCA1   | 4.456288826 | 4.613798692 | SIM2     | 0.162187308 | 0.162164032 |
| BRCA2   | 1.341063353 | 1.27609292  | CD320    | 126.8428436 | 168.5508058 |
| ARIH2   | 31.31347562 | 33.2636585  | TOP2A    | 38.51486742 | 48.72927191 |
| QSOX1   | 58.25534986 | 48.7273644  | TOP2B    | 16.81172471 | 17.52601779 |
| QSOX2   | 8.735609616 | 10.78606774 | HIP1     | 2.243651996 | 2.58032083  |
| ARIH1   | 9.340619443 | 8.859620274 | CITED1   | 0.601540888 | 0.398424507 |
| NXPE3   | 1.761181862 | 1.976973964 | CITED2   | 155.7123219 | 103.3735308 |
| VKORC1  | 152.5181753 | 166.2060407 | CITED4   | 50.32090911 | 44.72218441 |
| NBPF3   | 3.114442044 | 2.414648638 | TOP3B    | 6.539207615 | 6.036852107 |
| NBPF8   | 3.918105898 | 4.613868414 | TOP3A    | 19.76474478 | 17.96215679 |
| NBPF9   | 4.764231383 | 4.739468137 | ALDH5A1  | 0.371312278 | 0.343946161 |
| ZFR     | 27.98731326 | 27.87932148 | CD302    | 1.510087437 | 1.796692195 |
| RGMB    | 15.06833727 | 11.99571536 | HIRA     | 23.9331176  | 20.13066486 |
| NBPF1   | 8.495453349 | 7.882785502 | KIAA1841 | 1.938380706 | 1.947415878 |
| SORCS2  | 0.14291366  | 0.155154055 | TATDN3   | 2.11114564  | 2.886683239 |
| ZFX     | 4.999797441 | 4.945245737 | TATDN1   | 32.26850594 | 45.36225243 |
| RGMA    | 2.192862103 | 1.479392606 | TATDN2   | 41.42175138 | 41.97929093 |
| INPP1   | 2.717979284 | 2.312273433 | SHISA5   | 297.3222953 | 256.5863289 |
| PAK1    | 7.521610996 | 7.478316468 | SHISA4   | 29.83134181 | 18.32169566 |
| PAK6    | 2.083907873 | 2.097242818 | SHISA2   | 26.55217322 | 32.08392798 |
| PAK2    | 21.52704566 | 20.95225077 | SHISA9   | 0.1         | 0.105514221 |
| PAK4    | 33.82424605 | 33.46537924 | SHISA8   | 0.1         | 0.121257402 |
| PLEKHA1 | 4.336046538 | 3.959301102 | SHISA7   | 0.504591552 | 0.634746058 |
| PLEKHA2 | 12.55136084 | 13.00832267 | PRPF4    | 25.28695603 | 30.48500259 |
| PLEKHA5 | 3.244979444 | 3.246053541 | PACRGL   | 4.29662126  | 5.593518575 |
| PLEKHA6 | 1.066991667 | 0.96056064  | PRPF6    | 49.45455078 | 45.3881371  |
| PLEKHA3 | 5.48946915  | 5.679145703 | FANCD2   | 7.960523475 | 9.601462688 |
| PLEKHA4 | 34.05453231 | 14.57430487 | PRPF3    | 34.29123832 | 36.00438171 |
| PLEKHA7 | 0.417328917 | 0.410736471 | RPS19BP1 | 50.7062601  | 68.20600952 |
| PLEKHA8 | 1.92936367  | 2.262800962 | PRPF8    | 110.3834099 | 108.260385  |
| RGP1    | 10.75432998 | 11.2828001  | POU2F1   | 0.581098875 | 0.58356122  |
| DPY19L1 | 14.68693615 | 13.35172884 | POU2F2   | 0.692459324 | 0.507163335 |
| DPY19L2 | 1.329312938 | 1.142330526 | EIF2S2   | 65.39986898 | 72.68549801 |
| DPY19L3 | 2.534321137 | 2.697000609 | POU2F3   | 0.1         | 0.1         |
| STK17A  | 33.45290475 | 31.41264472 | EIF2S1   | 27.76577007 | 32.91920825 |
| DPY19L4 | 6.275151787 | 5.931293367 | EIF2S3   | 68.27386909 | 78.15297708 |
| STK17B  | 4.152728221 | 3.762585844 | MAP6D1   | 2.019621553 | 1.939093365 |
| FHOD3   | 3.833587619 | 4.366699865 | AVEN     | 11.26392562 | 9.40382744  |
| FHOD1   | 2.806772749 | 2.597182711 | PYCR1    | 19.11129628 | 19.43661538 |
| JADE1   | 6.432940046 | 7.172453075 | SIX1     | 59.95900764 | 50.11569187 |
| JADE3   | 4.037138316 | 3.73049286  | IRF2BPL  | 21.48288066 | 19.24940597 |
| JADE2   | 39.42681989 | 35.34679302 | SIX4     | 4.28921851  | 4.042917743 |
| RGS4    | 12.43096402 | 14.66052615 | SIX5     | 16.10180432 | 12.39419377 |
| RGS5    | 0.694828563 | 0.980666346 | SIX2     | 20.5685195  | 21.58356394 |

|                    |             |             |                   |             |             |
|--------------------|-------------|-------------|-------------------|-------------|-------------|
| RGS2               | 2.216533506 | 2.408081451 | SIX3              | 1.726694761 | 1.68785967  |
| RGS3               | 41.01247802 | 37.67014612 | RBAK-<br>RBAKDN   | 0.644943465 | 0.489099645 |
| PALM               | 21.65323415 | 15.58060162 | COLEC12           | 0.1         | 0.1         |
| GGT1               | 0.177684152 | 0.183201868 | COLEC11           | 0.1         | 0.1         |
| ARID2              | 4.24651484  | 3.788024365 | MAPK9             | 13.13145134 | 13.90750374 |
| RGS9               | 0.202914574 | 0.114696579 | MAPK8             | 2.961007557 | 3.214971026 |
| GPANK1             | 5.288618678 | 5.564202392 | MAPK7             | 22.02514435 | 16.84389445 |
| TMX4               | 15.87405749 | 14.90320398 | MAPK1             | 28.42029551 | 25.88909829 |
| TMX3               | 10.54499857 | 10.81001215 | MAPK6             | 17.3515128  | 17.07990944 |
| TMX2               | 65.35799357 | 73.87433496 | MAPK3             | 35.90243686 | 30.43752252 |
| TMX1               | 14.51825158 | 13.64877073 | QPCTL             | 9.878799431 | 10.53323583 |
| MZF1               | 4.464080101 | 3.637674844 | TOMM70A           | 18.44481294 | 23.58760944 |
| NXPB2              | 1.236434184 | 0.867965159 | TDRKH             | 6.628196368 | 6.053868277 |
| NXPB3              | 0.212266401 | 0.113360045 | AVIL              | 1.806677956 | 1.669556046 |
| YTHDC1             | 9.984792499 | 10.50583666 | LSM10             | 69.653592   | 74.50653333 |
| YTHDC2             | 4.736742064 | 5.204270171 | LSM12             | 2.296008085 | 2.384785598 |
| NXPB4              | 3.238962966 | 1.909471521 | LSM11             | 1.418560329 | 1.63533058  |
| PTGES3L-<br>AARSD1 | 1.748867576 | 2.284017144 | CYB5R2            | 0.75406284  | 0.81163868  |
| PANO               | 0.825576494 | 0.825304925 | CYB5R1            | 30.86603317 | 25.3186145  |
| GGT5               | 0.821545514 | 0.62991666  | CYB5R4            | 8.261460068 | 8.948452634 |
| GGT7               | 10.03764957 | 9.148728415 | CYB5R3            | 217.665452  | 174.619443  |
| CACFD1             | 3.527341189 | 2.379745629 | PRRT1             | 0.271252891 | 0.236951035 |
| VTA1               | 16.77705672 | 20.00149005 | PRRT3             | 7.959685349 | 6.609478776 |
| PAN2               | 2.459663362 | 2.765366371 | PRRT2             | 0.807827918 | 0.816965823 |
| PAN3               | 3.807743778 | 4.094050071 | CYB5RL            | 1.767824718 | 1.78182505  |
| PICALM             | 54.25398108 | 46.39845217 | AVL9              | 6.724010845 | 6.560160308 |
| TMEM45B            | 0.1         | 0.1         | JPH1              | 0.598960355 | 0.625917746 |
| GSK3B              | 11.42607806 | 11.14810814 | JPH2              | 2.108565567 | 1.689196252 |
| GSK3A              | 43.25365366 | 46.35279922 | JPH3              | 0.1         | 0.118533183 |
| PAPL               | 1.818847111 | 0.964111231 | UPF2              | 7.945900489 | 8.713859445 |
| TRIAP1             | 7.967409965 | 9.765823335 | UPF1              | 23.70715725 | 24.13635431 |
| TMEM191C           | 0.298742452 | 0.128381152 | CCSAP             | 2.707201364 | 3.330618651 |
| TMEM191B           | 0.216831957 | 0.155613443 | PELI1             | 1.148127701 | 1.2619622   |
| HSDL2              | 13.33040229 | 12.94494103 | PELI3             | 7.445880272 | 6.291373217 |
| HSDL1              | 4.844732221 | 4.802504709 | PELI2             | 0.10912066  | 0.113024637 |
| ZP3                | 7.416090461 | 6.177717139 | RABAC1            | 173.3996749 | 133.9515637 |
| EAPP               | 18.2135758  | 19.059852   | UPK2              | 0.266867057 | 0.179430763 |
| PAOX               | 2.981519401 | 2.257334382 | RUVBL2            | 124.4006014 | 143.5080187 |
| TMEM45A            | 4.845107797 | 3.35694211  | RUVBL1            | 62.38554536 | 80.28469509 |
| PARG               | 6.404529379 | 7.105318777 | EPM2A             | 1.149520747 | 1.0099579   |
| PARN               | 12.24948774 | 13.49143917 | AGTPBP1           | 7.352901847 | 7.585655237 |
| PARL               | 13.86809521 | 15.30429486 | S100A2            | 23.62103506 | 21.97900975 |
| ATOH8              | 7.720347638 | 6.825413379 | S100A1            | 1.236980809 | 0.911825186 |
| SMNDC1             | 7.43402049  | 8.822096268 | FTSJ2             | 22.19795104 | 26.35089961 |
| CHURC1             | 10.6770788  | 11.0486792  | STON1-<br>GTF2A1L | 0.411978948 | 0.390554826 |
| R3HDM4             | 34.50443882 | 32.1498517  | FTSJ1             | 36.18847264 | 39.54747019 |
| R3HDM1             | 9.919386463 | 11.29749649 | FTSJ3             | 19.86454876 | 23.01937944 |

|             |             |             |              |             |             |
|-------------|-------------|-------------|--------------|-------------|-------------|
| R3HDM2      | 9.683357502 | 8.494474188 | FRMD3        | 0.149084729 | 0.191123235 |
| ARIH2OS     | 0.750203717 | 0.424980179 | OLFM1        | 16.94710861 | 19.43439837 |
| SYTL1       | 0.168537305 | 0.132624596 | OLFM2        | 1.403343627 | 1.030611294 |
| CD3EAP      | 9.886317848 | 11.63689526 | FRMD5        | 2.61283975  | 2.079822064 |
| PASK        | 2.412972323 | 2.626726133 | TXLNA        | 42.63808688 | 38.98081179 |
| SYTL4       | 2.014474233 | 1.494867116 | FRMD6        | 19.24752132 | 16.49573893 |
| SYTL3       | 0.740765276 | 0.393280884 | MAPKAPK3     | 9.527056177 | 10.23321896 |
| SYTL2       | 1.446718697 | 1.464530493 | FRMD8        | 22.68329764 | 19.00299726 |
| COMMD3-BMI1 | 12.07578138 | 13.51214686 | MAPKAPK2     | 51.15021701 | 49.43935438 |
| CDC42SE1    | 28.28719929 | 29.82894059 | S100A6       | 970.4403227 | 821.2768559 |
| POU5F1B     | 0.1         | 0.1         | S100A5       | 0.410342156 | 0.188636    |
| KIAA0319L   | 19.533146   | 16.08009278 | S100A4       | 52.32761356 | 48.83542045 |
| NXNL2       | 2.695785913 | 2.156555414 | MAPKAPK5     | 13.68307067 | 18.39611863 |
| MTHFR       | 3.689360955 | 2.621365701 | S100A3       | 5.027627897 | 2.964996574 |
| MTHFS       | 1.923237205 | 2.044894971 | S100A9       | 0.1         | 0.164287983 |
| INO80       | 7.042154529 | 6.4981724   | UBFD1        | 12.69550038 | 12.41066326 |
| GLUD1       | 43.33792989 | 47.5988877  | LOC101929012 | 3.011723488 | 2.835557977 |
| GLUD2       | 2.769872907 | 2.991279762 | CRYBG3       | 1.5930194   | 1.504141149 |
| H2AFY2      | 0.1         | 0.134046963 | PMEP1        | 2.931017127 | 2.868108781 |
| RLTPR       | 0.753114863 | 1.032672021 | UPP1         | 14.23980524 | 14.06906511 |
| CDC42SE2    | 7.543934683 | 8.863839096 | DNM1L        | 18.33987679 | 20.13754486 |
| CYB561D1    | 2.477121395 | 2.616948702 | PELP1        | 29.90894902 | 28.89618567 |
| ING1        | 10.22225996 | 11.27091655 | SIGMAR1      | 176.26696   | 208.2038342 |
| CYB561D2    | 35.05060993 | 27.08877871 | QTRT1        | 18.87100113 | 23.93036013 |
| ING4        | 8.978945519 | 8.552973625 | PPM1A        | 4.619644103 | 4.430657068 |
| ING5        | 1.31544736  | 1.653818393 | PPM1B        | 5.254646183 | 5.3798969   |
| ING2        | 4.629684374 | 4.818044507 | RUSC1-AS1    | 9.686721096 | 9.756980474 |
| ING3        | 3.093562693 | 2.994826035 | PPM1M        | 7.561210522 | 4.784189948 |
| HSBP1       | 29.6409222  | 35.96328887 | PPM1N        | 0.312046028 | 0.13785119  |
| TNNC1       | 0.398570557 | 0.206592432 | PPM1H        | 6.140456491 | 4.030151133 |
| ATPIF1      | 49.19058328 | 58.89184467 | PPM1J        | 2.191387463 | 1.636572811 |
| TNNC2       | 0.252126726 | 0.154310639 | PPM1K        | 0.935635108 | 0.454617977 |
| PAWR        | 2.819117624 | 2.921756265 | BARX1        | 0.275274214 | 0.1         |
| PAX6        | 2.295394432 | 2.112490285 | PPM1D        | 1.839682779 | 2.02535647  |
| INF2        | 14.60283816 | 12.76251118 | PPM1E        | 1.227132365 | 1.250514245 |
| PAX8        | 4.994053713 | 3.429784584 | BARX2        | 16.85847644 | 20.23203473 |
| PAX9        | 0.1         | 0.1         | PPM1F        | 10.66058745 | 12.32640887 |
| CTDP1       | 8.765467462 | 8.521057709 | PPM1G        | 84.18794874 | 88.93585496 |
| METTL7B     | 0.962404996 | 0.543356568 | LOC101929046 | 0.232952724 | 0.218663359 |
| METTL7A     | 0.239093111 | 0.378082103 | LOC101929051 | 0.349166796 | 0.233432252 |
| LGALS7B     | 0.1         | 0.1         | ELMSAN1      | 6.391876878 | 6.46096257  |
| MZT1        | 8.112386001 | 12.37244801 | TP53INP2     | 9.220447267 | 7.178833361 |
| KTN1        | 41.44530694 | 45.12188335 | TP53INP1     | 3.795048362 | 3.374944961 |
| ZYX         | 103.6901322 | 88.08710722 | MCOLN3       | 1.587979291 | 1.219565225 |
| NOTUM       | 0.334331425 | 0.367707108 | PRRX1        | 13.80564271 | 13.20277842 |
| INHA        | 0.463041768 | 0.41106219  | PRRX2        | 54.27040093 | 50.80384881 |

|             |             |             |          |             |             |
|-------------|-------------|-------------|----------|-------------|-------------|
| GHDC        | 13.58456836 | 10.60978418 | LYSMD2   | 0.836897546 | 1.196163303 |
| BZW2        | 75.62767069 | 95.12285601 | LYSMD1   | 2.068813675 | 2.412716962 |
| BZW1        | 20.52423836 | 22.44641167 | LYSMD4   | 1.286025937 | 1.113827693 |
| TUBB8       | 0.1         | 0.1         | LYSMD3   | 6.555414034 | 5.935607538 |
| TUBB6       | 100.474538  | 102.8495985 | MCOLN1   | 46.75214767 | 34.55973779 |
| TUBB3       | 485.7846929 | 478.7285045 | TPD52L1  | 0.884311155 | 0.953352493 |
| TUBB1       | 0.263462256 | 0.450145161 | MCOLN2   | 0.594936607 | 0.965205584 |
| SMARCAD1    | 7.142708405 | 9.597713405 | TPD52L2  | 81.89972483 | 77.09942237 |
| STK32C      | 6.180187206 | 6.121893895 | TMLHE    | 7.116898051 | 6.552380837 |
| CYB561A3    | 18.91636098 | 18.73372471 | JMJD1C   | 5.457142834 | 4.511951247 |
| INIP        | 4.873065005 | 5.906317802 | CYB5D2   | 12.6067889  | 10.4225007  |
| RALGAPB     | 9.270691231 | 8.298952676 | CYB5D1   | 6.784601042 | 8.477379761 |
| TNIK        | 0.278957206 | 0.387502149 | RASSF1   | 20.55200705 | 21.5128486  |
| RHCE        | 14.46142351 | 11.05601555 | RASSF2   | 0.118891373 | 0.106744394 |
| METTL2B     | 8.956954645 | 10.67404737 | RASSF3   | 14.03996178 | 14.04749146 |
| TNKS        | 7.864047488 | 7.075339432 | RASSF4   | 0.812016006 | 0.784019012 |
| METTL2A     | 6.08089334  | 7.389246628 | RASSF5   | 0.430077174 | 0.345928174 |
| ITPRIPL2    | 3.237724873 | 2.658384497 | C5orf15  | 45.51466299 | 41.61749507 |
| ITPRIPL1    | 3.351470743 | 3.98654685  | CD2BP2   | 20.72902336 | 22.95246658 |
| PITRM1      | 38.37473623 | 41.04836487 | UPRT     | 4.506762016 | 3.766116034 |
| PPAN-P2RY11 | 8.679109959 | 12.16978373 | ZMPSTE24 | 33.92988368 | 33.78361251 |
| CEP350      | 2.393037721 | 2.499873105 | C5orf24  | 11.18344692 | 12.25622601 |
| TNK2        | 7.243419324 | 7.33027631  | C5orf22  | 9.578375284 | 10.23619657 |
| TNK1        | 0.437692187 | 0.214213991 | C5orf28  | 4.860475579 | 4.264864728 |
| RHEB        | 53.02771061 | 55.24963983 | RASSF7   | 3.254935849 | 2.513588025 |
| TUBA8       | 0.466887549 | 0.431821637 | RASSF8   | 8.207695452 | 6.388862558 |
| METTL12     | 0.999403806 | 1.567864779 | DCLK2    | 8.051116039 | 7.220030976 |
| SCPEP1      | 13.82902641 | 11.00892702 | RASSF9   | 0.389261008 | 0.740266788 |
| METTL14     | 5.586730138 | 6.812016775 | C5orf30  | 9.765353856 | 9.62617623  |
| METTL13     | 24.60416851 | 26.67671254 | DCLK1    | 4.24357934  | 2.918332607 |
| METTL10     | 5.397861902 | 5.896412938 | C5orf34  | 6.412402831 | 7.904750802 |
| METTL16     | 5.278887284 | 6.239413054 | C5orf38  | 0.1         | 0.1         |
| METTL15     | 2.688152386 | 3.056781362 | CALM3    | 302.0797335 | 293.4378418 |
| METTL18     | 3.410793245 | 4.400408418 | CALM1    | 73.37620199 | 77.80077337 |
| METTL17     | 13.80047674 | 18.4601584  | CALM2    | 195.5756574 | 221.8387829 |
| METTL23     | 14.68582508 | 17.55968185 | INTS12   | 14.64823474 | 16.58629608 |
| DMRTA2      | 0.672930074 | 0.821910467 | GPAA1    | 191.0152878 | 173.9239446 |
| METTL22     | 4.465393357 | 4.521235539 | INTS10   | 36.14856497 | 39.33047941 |
| METTL25     | 0.77626023  | 0.755313024 | SECTM1   | 161.7363131 | 98.8823172  |
| DMRTA1      | 0.844740287 | 0.631758247 | C5orf42  | 1.760426156 | 1.565967787 |
| METTL20     | 0.638476508 | 0.534631961 | C5orf46  | 0.195851065 | 0.1         |
| TNNI2       | 0.1         | 0.1         | C5orf45  | 64.85525531 | 48.03517561 |
| TNNI3       | 0.346506652 | 0.496023126 | C5orf49  | 0.1         | 0.11555311  |
| CTNNAL1     | 45.02163233 | 46.38905779 | GRIPAP1  | 12.08612191 | 9.232940716 |
| HSF2BP      | 0.701857869 | 0.549271102 | C5orf51  | 7.491765376 | 8.418128799 |
| TNS4        | 0.1         | 0.117885326 | C5orf55  | 2.814343754 | 2.601489943 |
| TNS3        | 30.03779285 | 24.78237442 | C5orf54  | 0.914341356 | 1.091115947 |
| SACM1L      | 11.63382815 | 12.04778376 | POPDC2   | 0.181727232 | 0.158354745 |
| EBF1        | 1.469212647 | 1.176110623 | POPDC3   | 5.019628501 | 6.242215828 |

|          |             |             |            |             |             |
|----------|-------------|-------------|------------|-------------|-------------|
| EBF4     | 0.956633904 | 0.660681316 | DERL3      | 0.587043222 | 0.621636712 |
| RUNX3    | 0.123940681 | 0.151282257 | CRYBA2     | 0.1         | 0.183828624 |
| RUNX2    | 2.46694995  | 2.665128725 | DERL1      | 54.63328655 | 51.50984887 |
| RUNX1    | 7.027789203 | 7.239377598 | DERL2      | 21.60018216 | 23.41633302 |
| INTU     | 0.702793443 | 0.847546555 | TXLNG      | 5.299854838 | 8.453781736 |
| PRKCDBP  | 47.54248727 | 40.66391942 | EXOSC7     | 12.7367971  | 17.60597863 |
| GSTT2B   | 1.329056598 | 2.226417169 | EXOSC6     | 7.403738351 | 7.75885431  |
| TMEM50A  | 43.81399805 | 39.1600603  | C5orf66    | 1.737914149 | 1.569372791 |
| INSR     | 1.440463698 | 1.567313749 | EXOSC5     | 18.28817343 | 28.79759938 |
| TMEM50B  | 4.253443954 | 3.445236604 | EXOSC4     | 89.43297795 | 105.7458431 |
| AMMECR1  | 10.6960581  | 11.30635677 | EXOSC9     | 14.66784592 | 18.75989989 |
| CIDEB    | 4.235208473 | 5.166065426 | EXOSC8     | 30.88048728 | 38.37718352 |
| CIDEC    | 0.139566852 | 0.1         | EXOSC3     | 28.82699618 | 35.38076316 |
| INVS     | 2.878206917 | 2.866950656 | EXOSC2     | 13.23099205 | 19.83000728 |
| EPB41L4B | 2.858316378 | 2.983893974 | EXOSC1     | 18.03448431 | 22.32424391 |
| EPB41L4A | 0.414068591 | 0.664493252 | CRYBB3     | 0.280595401 | 0.314914057 |
| UCHL1    | 53.99251686 | 50.42793898 | WWC1       | 1.718900158 | 2.356804887 |
| RHOG     | 63.86466576 | 57.07308767 | WWC2       | 6.239321073 | 5.620541702 |
| IL17RE   | 0.924914419 | 0.68900405  | PPME1      | 17.70784601 | 17.86593104 |
| RHOF     | 4.72974419  | 4.472084473 | KHSRP      | 59.95531017 | 70.69772889 |
| TUBG2    | 9.420256194 | 9.569567625 | WWC3       | 8.841724015 | 8.514294899 |
| RHOC     | 611.4293072 | 550.7771026 | CKLF-CMTM1 | 15.47600767 | 17.43241266 |
| IL17RD   | 0.94003785  | 0.963545382 | MASP2      | 0.311614163 | 0.38708316  |
| TUBG1    | 93.91053244 | 91.39994155 | PSMD10     | 26.86777994 | 26.2591642  |
| UCHL3    | 23.05751668 | 29.84598849 | PSMD12     | 22.24506297 | 24.80880184 |
| IL17RC   | 13.30057209 | 8.748239885 | PSMD11     | 27.39446135 | 27.6759767  |
| UCHL5    | 10.56395891 | 13.91423586 | PSMD14     | 48.81377748 | 52.64106706 |
| RHOA     | 263.3972888 | 263.1173239 | PSMD13     | 52.25754977 | 55.56240615 |
| IL17RB   | 0.348787134 | 0.552170942 | CALD1      | 36.40234492 | 28.58707181 |
| RHOB     | 14.1468176  | 12.2296513  | FDPS       | 117.734467  | 116.2849176 |
| IL17RA   | 6.660297174 | 5.861489333 | TIMM10B    | 3.938764309 | 4.289735166 |
| TNNT1    | 4.891852945 | 3.894106495 | QDPR       | 14.02281652 | 12.37496001 |
| RHOU     | 1.21697622  | 1.245405406 | MAST4      | 2.529567003 | 2.07913571  |
| RHOV     | 0.191409872 | 0.1         | PRKCSH     | 262.0786752 | 248.0081864 |
| RHOQ     | 12.04124464 | 12.27688282 | MAST3      | 1.081911047 | 0.900425384 |
| TUBD1    | 1.996336223 | 2.049192045 | MAST2      | 24.88797507 | 22.68799589 |
| PBLD     | 1.102533326 | 0.744244492 | MAST1      | 0.965326978 | 1.05692852  |
| KIAA0754 | 6.017934546 | 4.298938426 | CALB2      | 0.1         | 0.150502609 |
| KIAA0753 | 6.602609597 | 6.815996402 | CALB1      | 0.223155931 | 0.173279665 |
| RANBP2   | 5.248640821 | 5.44211105  | TIMM17A    | 54.96355471 | 66.95446465 |
| RANBP1   | 108.894663  | 153.48164   | MLST8      | 33.41147207 | 38.81587093 |
| RANBP3   | 20.0436707  | 21.13311186 | TIMM17B    | 59.22999888 | 65.72295216 |
| RANBP9   | 15.68705194 | 16.32944244 | MASTL      | 19.52800099 | 20.41688197 |
| MTSS1L   | 31.21648717 | 22.9139929  | MAT2B      | 35.35346139 | 38.43980542 |
| TUBE1    | 5.39238085  | 5.251518942 | SAMHD1     | 41.81586499 | 22.82123086 |
| RANBP6   | 4.876999722 | 5.260438955 | AURKC      | 0.611437442 | 0.638153706 |
| R3HCC1   | 25.96374343 | 30.02643191 | AURKB      | 72.23234995 | 91.7796584  |
| GOLT1B   | 15.48532622 | 15.67682895 | AURKA      | 69.77631023 | 91.1678528  |
| GOLT1A   | 0.1         | 0.142009248 | SH3TC2     | 0.682448478 | 0.642875494 |
| ARHGAP39 | 11.59873775 | 11.58290064 | MAT2A      | 105.2123309 | 123.9076411 |

|          |             |             |          |             |             |
|----------|-------------|-------------|----------|-------------|-------------|
| ARHGAP35 | 17.39371454 | 16.1161334  | CYP24A1  | 0.1         | 0.1         |
| ARHGAP44 | 14.80894943 | 13.06901299 | CNTFR    | 0.1         | 0.172308316 |
| ARHGAP42 | 2.166243971 | 2.262265158 | HOXA9    | 3.888377028 | 4.049257361 |
| PDIA3    | 81.03784409 | 86.0214576  | SOX18    | 0.130469957 | 0.143512218 |
| PDIA6    | 89.96841372 | 84.66537736 | SOX15    | 8.708855797 | 8.003132965 |
| PDIA5    | 37.43126133 | 34.56450456 | HOXA3    | 0.1         | 0.1         |
| PDIA4    | 110.2906552 | 106.2298362 | FDXR     | 1.778346423 | 1.796154716 |
| CMPK1    | 29.32037695 | 34.81406268 | HOXA1    | 0.1         | 0.129104877 |
| CMPK2    | 20.99082538 | 4.592160137 | HOXA7    | 0.125743943 | 0.1         |
| LRIF1    | 8.910704714 | 8.55353801  | HOXA6    | 0.1         | 0.1         |
| BTF3L4   | 8.435925338 | 10.54996109 | HOXA5    | 0.1         | 0.144772681 |
| TMEM59L  | 1.010361162 | 0.533343063 | HOXA4    | 0.1         | 0.142933063 |
| ARHGAP19 | 4.233349774 | 4.669080688 | UNC13B   | 6.616762522 | 5.847932436 |
| ARHGAP18 | 6.106754667 | 7.580103709 | SOX13    | 9.422955319 | 8.229979054 |
| ARHGAP17 | 10.90305506 | 9.778556742 | SOX11    | 1.845810776 | 2.154878112 |
| ARHGAP12 | 9.920368713 | 9.582446005 | SOX12    | 11.6881015  | 12.40366826 |
| ARHGAP22 | 0.115757136 | 0.133752653 | UNC13D   | 0.111825922 | 0.116887852 |
| ARHGAP21 | 22.06602376 | 17.85983826 | PRR19    | 13.61412303 | 12.87687946 |
| ASPSCR1  | 7.434297926 | 6.59366109  | FDX1     | 6.373672433 | 7.601134079 |
| ARHGAP29 | 13.1604724  | 9.433554591 | PRR16    | 36.94299745 | 32.35762523 |
| SSC5D    | 0.343356287 | 0.34930906  | HOXB4    | 10.96044895 | 13.31012116 |
| ARHGAP28 | 0.1         | 0.1         | PRR15    | 0.12520683  | 0.11799814  |
| ARHGAP27 | 0.187570631 | 0.178158799 | HOXB3    | 7.722557143 | 8.020054047 |
| ARHGAP26 | 2.098341934 | 1.855509971 | HOXB2    | 22.05945498 | 24.86798751 |
| ARHGAP24 | 6.118472656 | 5.10020414  | PRR12    | 6.190787766 | 6.302841269 |
| ARHGAP23 | 10.33468125 | 9.279932443 | HOXB8    | 0.517069961 | 0.863101261 |
| ARHGAP33 | 4.427318556 | 4.269953669 | HOXB7    | 10.77908473 | 11.79538085 |
| ARHGAP32 | 2.114133179 | 2.191155644 | PRR11    | 5.332849156 | 7.761810625 |
| ARHGAP31 | 2.710746188 | 2.52886668  | HOXB6    | 6.507707282 | 7.219289636 |
| ARHGAP30 | 0.111740402 | 0.125148587 | PRR14    | 13.46801036 | 12.37715321 |
| EBPL     | 28.27776645 | 44.53184535 | PRR13    | 129.6521384 | 125.7235067 |
| ULBP2    | 2.025547701 | 1.254896204 | HOXB5    | 7.346361533 | 7.148095275 |
| ULBP1    | 0.182672306 | 0.206253181 | ENDOD1   | 0.321399007 | 0.163233183 |
| ULBP3    | 0.1         | 0.1         | SKA3     | 20.76304644 | 27.14226983 |
| ARHGAP10 | 8.138352623 | 8.600027536 | HIF1A    | 94.22409236 | 89.77850522 |
| TMEM55A  | 11.99740383 | 11.84802769 | SKA1     | 4.550931886 | 5.820484845 |
| TMEM55B  | 25.37283442 | 23.76559628 | SKA2     | 12.35364911 | 14.32858326 |
| MTIF2    | 7.076163337 | 8.288640956 | HOXC5    | 1.267090011 | 1.721602893 |
| MTIF3    | 11.16471057 | 11.05904839 | HOXC4    | 2.082529217 | 2.030312203 |
| TOB2     | 8.392396204 | 8.881738474 | HOXC9    | 14.95766092 | 16.45799805 |
| TOB1     | 10.89416613 | 9.017185613 | PRR22    | 0.921069033 | 1.592294042 |
| NT5DC1   | 5.562438519 | 5.96820462  | RREB1    | 2.076257269 | 1.649039136 |
| NT5DC2   | 63.96921839 | 99.69286187 | HOXC8    | 8.153582239 | 7.697014819 |
| NT5DC3   | 2.1236081   | 1.652874714 | ELANE    | 1.115466712 | 0.419027231 |
| LRIG1    | 3.001940293 | 2.600467732 | PRR24    | 32.91785077 | 26.45056381 |
| LRIG3    | 4.378340457 | 4.264001987 | HOXC6    | 22.22554385 | 23.85954532 |
| LRIG2    | 3.119706491 | 2.5025403   | H3F3B    | 52.37777299 | 56.51604423 |
| PIKFYVE  | 2.71828979  | 2.658864306 | H3F3C    | 0.345748708 | 0.205281456 |
| SSBP1    | 39.62601864 | 54.30917693 | H3F3A    | 2.350243635 | 4.501002766 |
| SSBP2    | 12.52641967 | 11.94687144 | MAD2L1BP | 27.6865308  | 22.96035822 |



|                  |             |             |                  |             |             |
|------------------|-------------|-------------|------------------|-------------|-------------|
| SSBP3            | 9.184289059 | 11.68195232 | SOX30            | 0.131823141 | 0.111361153 |
| SSBP4            | 69.901352   | 71.17466423 | TNFSF9           | 11.98794987 | 9.590759634 |
| NUP107           | 14.43482739 | 20.35692942 | UNC119           | 8.09250415  | 7.783952048 |
| TEX40            | 0.798269852 | 1.196870505 | TINAGL1          | 0.123223637 | 0.149746311 |
| SPINT2           | 0.734255324 | 0.676379941 | BATF2            | 4.396904684 | 0.429340728 |
| ALKBH7           | 27.96867901 | 24.70867673 | BATF3            | 4.972087137 | 3.919073174 |
| ALKBH6           | 11.85127926 | 11.24010102 | CNTD2            | 0.1         | 0.161245184 |
| ALKBH8           | 1.517898142 | 2.115689876 | MINOS1-<br>NBL1  | 9.902571266 | 9.566565485 |
| ALKBH3           | 10.76176621 | 10.78614602 | AHNAK            | 20.62648382 | 17.32123527 |
| ALKBH2           | 14.68281459 | 23.7138301  | TM9SF4           | 52.23411204 | 44.96174798 |
| ALKBH5           | 44.04829925 | 44.76638822 | TM9SF3           | 25.49182121 | 24.88784427 |
| ALKBH4           | 6.223441416 | 6.833264487 | ASNA1            | 105.0578143 | 109.8465682 |
| ALKBH1           | 5.707120416 | 6.227353562 | ZMYM6NB          | 21.66680039 | 17.38387635 |
| FGFR1OP2         | 6.272428948 | 6.221149534 | WVOX             | 1.406685263 | 1.770366104 |
| SPINT1           | 0.141997799 | 0.174968    | ADAT1            | 4.295898307 | 3.43569521  |
| ASPHD1           | 6.902426765 | 6.697861539 | WWP1             | 22.35481957 | 22.85531489 |
| KIAA0247         | 2.48900736  | 2.184096486 | WWP2             | 8.362403528 | 5.732817827 |
| ASPHD2           | 0.178405187 | 0.234358586 | ADAT3            | 16.74613487 | 17.82581004 |
| SAR1A            | 47.95876102 | 42.38638345 | ADAT2            | 0.559370562 | 1.21519667  |
| SAR1B            | 5.989529821 | 5.325865841 | TM9SF2           | 77.13273274 | 67.60821651 |
| TEX22            | 0.43239432  | 0.462983937 | TM9SF1           | 78.09961817 | 64.39556592 |
| TEX29            | 0.173274015 | 0.152318993 | CYB561           | 17.80691907 | 21.12865223 |
| LOH12CR1         | 2.392334524 | 2.234916039 | LOC10192910<br>8 | 0.1         | 0.1         |
| ATRIP            | 12.03316926 | 12.99928711 | TOR2A            | 3.012388997 | 2.955650377 |
| TOE1             | 12.19735003 | 14.47554015 | CLSTN2           | 0.110641392 | 0.1         |
| TEX30            | 16.98323532 | 16.3502718  | CLSTN3           | 1.879990007 | 1.202732182 |
| NCAPH2           | 20.72223629 | 18.71356009 | CLSTN1           | 71.84319259 | 61.16391338 |
| PBX3             | 8.060853393 | 9.092525133 | RTKN2            | 2.123880305 | 2.447596035 |
| PBX2             | 4.578976917 | 4.759882402 | PYCARD           | 0.167207344 | 0.291949113 |
| TEX36            | 1.565003472 | 1.226503962 | TOR3A            | 14.65320612 | 16.35926022 |
| TEX37            | 0.1         | 0.1         | ADAM9            | 181.7076721 | 154.5308236 |
| PBX4             | 1.017686934 | 1.046465476 | ADAM8            | 0.273118463 | 0.324745024 |
| PBX1             | 7.630659816 | 8.196988802 | DNMT1            | 52.85940795 | 56.11906021 |
| NCAPG2           | 24.10019265 | 28.19079591 | FECH             | 2.455581396 | 2.735021148 |
| SNX12            | 54.12167281 | 56.5859925  | SKIL             | 1.547647114 | 1.332228993 |
| SNX13            | 6.199050758 | 5.802346094 | TOR1A            | 48.00568845 | 46.52935519 |
| SNX10            | 0.1         | 0.1         | TOR1B            | 25.24074075 | 25.76718035 |
| SNX11            | 6.588502536 | 6.153669084 | ADAP1            | 2.132107773 | 1.188221712 |
| IL18BP           | 2.032379401 | 1.400153178 | SERINC1          | 61.26897478 | 51.53139345 |
| SLC18A2          | 0.556183734 | 0.971789546 | SERINC3          | 91.57593677 | 78.5673276  |
| TEX10            | 26.63326995 | 27.38875538 | SERINC2          | 0.136975998 | 0.126401542 |
| TEX14            | 0.1         | 0.114999663 | SERINC5          | 4.670493576 | 5.298565039 |
| SLC18B1          | 4.510161205 | 4.529603922 | SERINC4          | 2.80796552  | 2.91106552  |
| LOC10192835<br>2 | 8.780977629 | 7.595712336 | DAGLA            | 2.075916926 | 2.31611552  |
| SNX32            | 0.479800458 | 0.681109653 | SPANXC           | 0.742961349 | 0.375451729 |
| SNX33            | 4.567199196 | 4.482917253 | ELAC2            | 62.44426377 | 78.47166497 |
| SNX30            | 5.98772032  | 5.732890078 | ELAC1            | 2.170606203 | 2.276146784 |

|              |             |             |              |             |             |
|--------------|-------------|-------------|--------------|-------------|-------------|
| LOC101928356 | 1.018588394 | 1.357120563 | ASMTL        | 2.675521101 | 4.622870641 |
| SNX29        | 1.1945149   | 0.922396384 | DAGLB        | 14.02508455 | 13.59921717 |
| SNX27        | 3.319249643 | 3.581631767 | PRR5L        | 3.441971652 | 2.186780791 |
| SNX25        | 5.79482026  | 5.063163556 | CHADL        | 0.170682009 | 0.226170633 |
| SNX24        | 6.469318937 | 6.314184132 | TP53RK       | 10.17297217 | 13.35184413 |
| APEX2        | 46.39739098 | 48.33126905 | ANTXR2       | 20.30040327 | 17.97826263 |
| SNX21        | 8.290810629 | 7.183308114 | ANTXR1       | 10.2469404  | 10.07696477 |
| SNX22        | 0.213523686 | 0.312777244 | CCT6B        | 0.291601127 | 0.373613449 |
| SNX18        | 10.20807956 | 9.711639412 | SAP130       | 14.45413907 | 12.1980494  |
| GID4         | 6.96218427  | 7.243607144 | C6orf226     | 15.15834115 | 10.51593434 |
| SNX19        | 8.715809015 | 7.271050552 | CHAC2        | 2.259543278 | 2.456570557 |
| SNX16        | 5.135786397 | 5.048035476 | CHAC1        | 20.28107298 | 13.86764245 |
| SNX17        | 42.77997216 | 39.46261711 | SKP2         | 8.163193916 | 10.34455146 |
| SHKBP1       | 28.60270478 | 22.49589323 | C6orf223     | 0.1         | 0.120471394 |
| SNX14        | 17.07124455 | 15.46682719 | SKP1         | 63.52328923 | 72.72155393 |
| APEX1        | 107.8161055 | 131.1835698 | NFKBIL1      | 9.260660101 | 8.216693812 |
| SNX15        | 6.717826412 | 5.934822426 | LOC101929078 | 0.775207728 | 0.979143082 |
| GID8         | 12.79737558 | 14.63769558 | ALDH7A1      | 17.73985823 | 18.00079089 |
| NCAPD2       | 41.36051274 | 54.30564483 | RWDD2B       | 5.650687768 | 7.786813903 |
| NCAPD3       | 13.27087682 | 18.21360086 | HKR1         | 5.988639111 | 6.077619131 |
| TMEM167B     | 12.49274098 | 11.29569379 | RWDD2A       | 1.694667495 | 1.781246381 |
| RIF1         | 3.733978771 | 3.555908748 | PRRC1        | 27.78330602 | 26.053799   |
| TMEM167A     | 23.52167883 | 27.70025924 | MAR1         | 0.1         | 0.232301975 |
| LAPTM4B      | 175.4529697 | 225.814189  | C6orf203     | 3.024793185 | 4.40077289  |
| LAPTM4A      | 157.7493142 | 135.1311715 | LOC101929097 | 0.179013349 | 0.1         |
| TOM1         | 21.4133444  | 16.85220408 | CCT6A        | 135.5945467 | 173.8187752 |
| CTNNBIP1     | 7.923213323 | 7.119675232 | MARCO        | 0.241556613 | 0.140429609 |
| SDCBP2       | 0.855774428 | 1.202736123 | C6orf211     | 8.356364172 | 9.35574204  |
| ARL8A        | 23.63002127 | 20.64128199 | HBS1L        | 11.4432636  | 13.27948526 |
| ARL8B        | 37.101144   | 37.31843474 | FEN1         | 49.33605344 | 55.95127721 |
| PKMYT1       | 41.23299386 | 41.96317622 | NKIRAS1      | 4.162355493 | 4.785578885 |
| AMDHD1       | 0.853974525 | 0.673084028 | PCF11        | 4.985364295 | 5.629418998 |
| AMDHD2       | 25.11265141 | 19.28109508 | NKIRAS2      | 19.37660337 | 15.70298393 |
| UCKL1        | 13.86127203 | 15.28050917 | CAMLG        | 22.94743938 | 24.96732014 |
| NOXA1        | 0.1         | 0.167078058 | TOR4A        | 0.393654306 | 0.61962828  |
| ZNF891       | 0.483487498 | 0.59931357  | OPRD1        | 0.1         | 0.120909902 |
| ECE1         | 35.88403165 | 31.10027625 | TBL1X        | 6.772307489 | 7.116411835 |
| ECE2         | 5.484556701 | 6.064034757 | RSL1D1       | 18.70820511 | 25.93666081 |
| ARL5B        | 2.559403254 | 2.703099381 | CAMK4        | 20.32902087 | 18.84562457 |
| ZNF888       | 3.284368943 | 2.87419747  | B9D1         | 15.46649981 | 15.31403032 |
| TRIM69       | 7.954702354 | 4.33089959  | CAMK1        | 25.45597464 | 23.13138751 |
| ARL5A        | 5.1164376   | 6.245294175 | B9D2         | 3.7349557   | 4.095205005 |
| TRIM65       | 6.847504588 | 7.847176158 | STEAP3       | 27.58507466 | 29.46369    |
| ZNF883       | 2.152719645 | 2.953397398 | STEAP4       | 0.1         | 0.108113335 |
| TRIM66       | 0.411529645 | 0.393053093 | BASP1        | 171.3080749 | 171.1300405 |
| ZNF880       | 1.086707116 | 0.788142659 | NPY1R        | 0.296475047 | 0.287049057 |
| TRIM62       | 3.684245873 | 3.200033153 | STEAP1       | 0.139566852 | 0.241257297 |

|          |             |             |               |             |             |
|----------|-------------|-------------|---------------|-------------|-------------|
| ARL4C    | 17.28318615 | 15.58905816 | STEAP2        | 0.1         | 0.1         |
| ARL4D    | 6.884803996 | 7.237994122 | SEZ6L2        | 12.47074265 | 8.78693855  |
| ARL4A    | 12.50555088 | 12.60715503 | NALCN         | 0.347637172 | 0.260743173 |
| PCCA     | 4.334717975 | 4.584864085 | MAN2A2        | 4.177209806 | 4.224203832 |
| ZNF879   | 1.280348326 | 1.113626279 | MAN2A1        | 13.42739394 | 12.30655651 |
| PCCB     | 21.77173675 | 25.98884267 | MARK4         | 7.799054398 | 7.387238444 |
| ZNF878   | 0.424326928 | 0.584203077 | MARK3         | 22.4425792  | 25.08500038 |
| TRIM59   | 0.207226578 | 0.406246986 | MARK2         | 11.28342143 | 11.6855537  |
| TOP1     | 25.89476902 | 30.5084742  | MARK1         | 5.937441494 | 6.456610213 |
| DCTPP1   | 42.12487227 | 54.78077532 | RAP1GAP2      | 2.431296986 | 1.909335736 |
| TRIM56   | 13.61875631 | 9.627145584 | ALYREF        | 81.22355283 | 104.7887315 |
| TRIM52   | 1.722752962 | 1.67248808  | TDRD7         | 20.09930934 | 9.186296815 |
| UBQLN1   | 47.46440799 | 52.48394004 | A2ML1         | 0.1         | 0.1         |
| TRIM46   | 11.57036882 | 10.07919749 | TDRD5         | 0.1         | 0.109379056 |
| TRIM47   | 20.35942578 | 20.94842889 | TDRD3         | 3.073865871 | 3.646899804 |
| ZNF865   | 13.84039427 | 12.29246972 | NMRAL1        | 36.03105941 | 37.71163252 |
| UBQLN4   | 25.60901025 | 32.07481162 | DNMBP         | 17.18709969 | 15.05358574 |
| ZNF862   | 1.222404132 | 0.981061113 | TP53I3        | 3.088347791 | 2.069601744 |
| RILP     | 3.955758838 | 2.501184864 | MAN2B2        | 22.75673324 | 16.77576023 |
| TRIM44   | 15.03279099 | 14.51394932 | MAN2B1        | 18.0509065  | 16.24240544 |
| TRIM45   | 0.999463606 | 1.156577758 | TGIF2-C2orf24 | 36.60887905 | 41.99258584 |
| ZNF860   | 0.116204391 | 0.123140465 | MAN2C1        | 3.648359899 | 3.885717909 |
| UBQLN2   | 15.72490133 | 14.39286625 | DESI1         | 9.055228029 | 12.06712161 |
| TRIM41   | 13.51684631 | 12.10016023 | DESI2         | 13.69389632 | 14.91772824 |
| CABLES1  | 1.00304917  | 1.233947537 | MARS2         | 2.237289335 | 4.509964038 |
| KIAA0232 | 3.472171472 | 3.598380697 | URB2          | 7.013879191 | 8.301293466 |
| TM6SF1   | 0.208855478 | 0.313743231 | URB1          | 3.926167327 | 4.760795491 |
| EFR3B    | 2.022573404 | 1.786098462 | ITGB1BP1      | 18.48879162 | 21.62861418 |
| CABLES2  | 4.766693308 | 4.049524166 | ITGB1BP2      | 0.1         | 0.430393383 |
| KIAA0226 | 7.252712047 | 4.380096097 | MOSPD2        | 5.283166544 | 4.749818733 |
| DBNDD1   | 6.996943059 | 7.280991479 | OPRL1         | 0.560969627 | 0.253599032 |
| DBNDD2   | 22.39872162 | 26.57163587 | MOSPD1        | 29.8430975  | 26.16659599 |
| TRIM39   | 1.198417869 | 1.071687392 | MOSPD3        | 12.62358298 | 13.14308586 |
| TRIM35   | 15.10650797 | 14.88676839 | PRRG4         | 0.454833591 | 0.366350405 |
| TRIM36   | 0.790810309 | 0.827336592 | PRRG2         | 0.361061693 | 0.339660801 |
| TRIM37   | 8.152678008 | 7.615757761 | PRRG1         | 3.248904253 | 3.02530574  |
| ZNF853   | 0.317794621 | 0.411018721 | OPRK1         | 0.1         | 0.107138985 |
| TRIM38   | 0.219979854 | 0.172488156 | SHCBP1        | 14.54161967 | 15.32076639 |
| ZNF852   | 0.626889219 | 0.457398153 | GNPDA1        | 60.09232494 | 56.52615717 |
| TRIM32   | 7.878726149 | 8.206870188 | GNPDA2        | 3.276130297 | 3.313688129 |
| TRIM33   | 5.931202212 | 6.185240356 | PWWP2B        | 5.598855072 | 5.698851983 |
| ZNF850   | 0.354120131 | 0.383800845 | LOC728392     | 8.311990198 | 3.255364437 |
| RFESD    | 0.24843222  | 0.497437495 | DPYSL4        | 5.411678926 | 3.838066029 |
| ECI1     | 31.04338667 | 32.92357235 | DPYSL5        | 0.1         | 0.1         |
| ECI2     | 50.02858381 | 54.06897128 | KIAA1586      | 3.693121383 | 4.067223575 |
| MTFR1L   | 33.69664132 | 31.5674239  | DPYSL2        | 81.95854509 | 66.74633177 |
| EFR3A    | 19.58772288 | 18.18486115 | GPBP1         | 19.90059486 | 19.67012141 |
| RINL     | 0.116966452 | 0.112114359 | PWWP2A        | 5.235819706 | 4.974409497 |
| TRIM28   | 175.565043  | 186.1850972 | FNBP4         | 12.76554861 | 14.76430419 |

|          |             |             |              |             |             |
|----------|-------------|-------------|--------------|-------------|-------------|
| TRIM29   | 0.165969876 | 0.147103703 | SAP30BP      | 19.66264986 | 18.15596095 |
| TRIM24   | 8.0386221   | 8.602483033 | FNBP1        | 6.157653933 | 5.925882222 |
| TRIM25   | 31.07721512 | 20.10011014 | CACNA2D1     | 2.042569321 | 1.995099847 |
| TRIM26   | 16.4950508  | 11.30745814 | CACNA2D2     | 0.196960203 | 0.217693323 |
| ARL16    | 13.055538   | 14.75941778 | FEZ1         | 0.1         | 0.1         |
| TRIM27   | 12.5497587  | 14.01187404 | FEZ2         | 9.547941063 | 10.68821545 |
| TRIM21   | 27.46262178 | 12.90700605 | TCEANC2      | 3.282760684 | 3.341325724 |
| TP63     | 0.393510039 | 0.332025656 | TXNIP        | 3.684058337 | 1.818600191 |
| TRIM22   | 1.394159925 | 0.292011213 | PLBD1        | 35.24509265 | 38.65335698 |
| TRIM23   | 3.789872749 | 2.962908723 | CLOCK        | 3.307628248 | 3.494921866 |
| ARL10    | 4.075863034 | 3.58771679  | PLBD2        | 39.87061034 | 32.78006519 |
| GIN1     | 1.871232605 | 1.636444753 | SLBP         | 39.70343723 | 47.49451725 |
| ARL15    | 2.248212895 | 2.984789099 | URI1         | 16.27096107 | 19.49403081 |
| ECH1     | 31.29630204 | 29.22226318 | ZC3HAV1      | 15.11748906 | 9.976358651 |
| TMEM170B | 0.519908099 | 0.809872906 | PRPSAP1      | 8.798920901 | 8.701317888 |
| TMEM170A | 2.671845395 | 2.403778097 | PRPSAP2      | 6.734741397 | 8.716572576 |
| TRIM13   | 1.831709233 | 1.789336512 | HLCS         | 2.498440948 | 2.255334839 |
| TRIM14   | 15.20696285 | 7.690342372 | CREBBP       | 6.300324025 | 5.21831831  |
| RIN3     | 8.427861235 | 7.106354588 | BTBD10       | 9.32078942  | 9.793241377 |
| TRIM16   | 11.13136388 | 11.32670731 | KIAA1598     | 1.524517388 | 1.24167831  |
| RIN1     | 26.8498751  | 29.49615926 | LOC101929668 | 0.456373089 | 0.297910948 |
| TP53     | 79.60986553 | 80.08940239 | JRKL         | 2.894018257 | 3.082080026 |
| RIN2     | 11.09258904 | 8.985703988 | CASP14       | 0.133037378 | 0.1         |
| TRIM11   | 14.94597993 | 16.61386513 | CASP10       | 0.1         | 0.10628076  |
| SYNGR1   | 5.145290756 | 4.521544368 | RING1        | 5.600020117 | 4.850955921 |
| SYNGR2   | 37.72940782 | 43.45681761 | PLSCR1       | 108.7275343 | 54.46561278 |
| B4GALNT1 | 21.64452846 | 19.24825729 | PLSCR3       | 16.81475868 | 14.45382952 |
| B4GALNT3 | 0.1         | 0.121578922 | PLSCR2       | 0.165020372 | 0.1         |
| B4GALNT2 | 0.1         | 0.1         | PLSCR4       | 2.400202185 | 1.634334867 |
| B4GALNT4 | 9.876586576 | 8.756021406 | PAFAH1B3     | 62.93360275 | 66.28166807 |
| PCK2     | 39.69811557 | 28.76220257 | PAFAH1B2     | 19.43562367 | 22.70453496 |
| RTFDC1   | 53.00396515 | 52.11686225 | PAFAH1B1     | 32.69216201 | 33.32881398 |
| HARS2    | 28.2695968  | 29.18419085 | LOC101927029 | 0.1         | 0.1         |
| POLA1    | 8.502768541 | 11.34188625 | ECHS1        | 47.32132625 | 52.8245146  |
| POLA2    | 27.23966589 | 26.59155428 | URM1         | 17.06829303 | 18.863586   |
| TP73     | 0.150506783 | 0.121637663 | CASP8AP2     | 3.518352544 | 3.423830357 |
| HERPUD2  | 10.93284958 | 8.586676287 | MYBBP1A      | 41.2697948  | 54.02783659 |
| ECM1     | 0.566977771 | 0.483445313 | CIAPIN1      | 16.43036342 | 21.32434484 |
| COX7B    | 200.6137006 | 279.5264491 | LY6K         | 144.0853087 | 110.6826086 |
| COX7C    | 392.4789322 | 546.2136209 | LY75         | 0.1         | 0.1         |
| HERPUD1  | 26.99465171 | 16.96800272 | MAP3K7CL     | 1.067606933 | 0.774439385 |
| PCM1     | 23.62919526 | 23.12199951 | ALDH1L2      | 5.978026165 | 4.488910496 |
| NMRK1    | 0.172794877 | 0.117325626 | UROD         | 53.44092019 | 57.64938538 |
| MCF2L2   | 0.296902905 | 0.270190669 | RINT1        | 7.274722727 | 7.778093536 |
| GIT1     | 28.0376282  | 27.88116275 | LY6D         | 0.1         | 0.1         |
| ATPAF2   | 10.54381341 | 10.61638732 | AJUBA        | 12.42349625 | 11.10988273 |
| COX8A    | 574.8430228 | 621.4089924 | LY6E         | 1523.208952 | 952.4359397 |
| TOX4     | 20.47753923 | 19.12118217 | LY96         | 0.85170658  | 0.815643077 |

|         |             |             |                  |             |             |
|---------|-------------|-------------|------------------|-------------|-------------|
| TOX2    | 0.610527486 | 0.581174325 | CREBL2           | 7.784374564 | 6.180213443 |
| PTPLAD1 | 32.40760523 | 31.45890856 | KIAA1524         | 12.73778427 | 15.70441253 |
| PTPLAD2 | 1.644599243 | 1.175972913 | KIAA1522         | 13.3374004  | 8.20149749  |
| ATPAF1  | 20.83506407 | 22.30782502 | TNFRSF14         | 1.649756357 | 0.874588157 |
| PCNA    | 84.18055381 | 103.9089138 | IP6K1            | 23.04893072 | 20.73874331 |
| NOXO1   | 0.608080948 | 0.57614761  | SAC3D1           | 15.28422773 | 16.76515187 |
| COX5B   | 115.9359166 | 135.4753431 | IP6K2            | 22.44197403 | 24.05296742 |
| COX5A   | 85.31358808 | 102.6629608 | UROS             | 17.91614398 | 18.51345857 |
| PCNP    | 35.46120862 | 44.31810162 | KIAA1551         | 2.459905519 | 2.374473753 |
| PCNX    | 3.333131565 | 2.784654027 | LOC10192708<br>5 | 0.526704534 | 0.442759236 |
| PCNT    | 5.699423416 | 5.567269275 | KIAA1549         | 2.675198086 | 2.526776945 |
| GIT2    | 11.70839777 | 11.63542118 | TNFRSF18         | 0.1         | 0.1         |
| COX6C   | 87.36235123 | 117.3030658 | TNFRSF19         | 13.89738945 | 12.94918134 |
| YIF1A   | 98.75936368 | 77.22092412 | TNFRSF1B         | 1.556049396 | 1.190114271 |
| YIF1B   | 29.98316139 | 29.35395343 | ARFGAP3          | 14.51359114 | 12.51273192 |
| RIT1    | 7.463410736 | 7.404631039 | ARFGAP1          | 32.70064495 | 25.06499611 |
| IL18R1  | 0.156761843 | 0.130396749 | TNFRSF1A         | 190.0979092 | 184.2876993 |
| NUP188  | 29.31860231 | 30.88262148 | ARFGAP2          | 12.17859798 | 11.23669474 |
| SPINK2  | 0.1         | 0.1         | ERBB2IP          | 24.91716105 | 22.34179439 |
| PCP2    | 0.204319833 | 0.137243139 | TNFRSF25         | 0.414475042 | 0.302086862 |
| PCP4    | 0.1         | 0.1         | TNFRSF21         | 27.43076515 | 23.87204389 |
| POLG2   | 3.199789332 | 3.675341318 | CANT1            | 17.57932419 | 17.10811206 |
| COX19   | 2.001304146 | 2.344913757 | HM13             | 166.7560559 | 152.2733013 |
| BHLHB9  | 1.308169232 | 1.398522831 | SRBD1            | 2.884610948 | 3.403730555 |
| COX16   | 5.939601896 | 8.331145785 | TXNL1            | 7.850338149 | 8.938974505 |
| COX15   | 7.734925606 | 7.679000528 | TNFRSF6B         | 134.768505  | 114.1444884 |
| COX18   | 1.466836604 | 1.592623976 | C16orf80         | 20.56687305 | 25.27924438 |
| COX17   | 24.78606778 | 28.24947362 | C16orf87         | 1.377182514 | 1.870220512 |
| NUP160  | 11.26619496 | 11.8491275  | C16orf86         | 0.96782695  | 1.226626156 |
| TIMM50  | 22.27826676 | 30.6031732  | C16orf72         | 17.66081114 | 18.39071476 |
| COX11   | 5.035731585 | 6.492441258 | C16orf71         | 0.483971005 | 0.237081176 |
| COX14   | 27.59710826 | 28.81933845 | C16orf70         | 6.956086164 | 6.342500728 |
| ECT2    | 27.44887657 | 33.876129   | C16orf74         | 2.35623586  | 2.661067152 |
| COX10   | 7.88749988  | 9.911048615 | SLPI             | 0.274333144 | 0.286715602 |
| NUP155  | 15.36691202 | 17.42415555 | C16orf62         | 15.24244976 | 13.51257986 |
| TIMM44  | 31.06296108 | 35.6362112  | ACTR3B           | 2.396447967 | 5.002386418 |
| NUP153  | 19.45034297 | 20.77553773 | TTBK2            | 0.650959864 | 0.620492461 |
| MKRN1   | 27.5017843  | 25.72805451 | ACTR3C           | 0.140555251 | 0.1         |
| MKRN2   | 15.24029491 | 16.18542669 | HLTF             | 11.4786015  | 15.17058816 |
| MKRN3   | 0.157425877 | 0.250344815 | LYAR             | 12.6490975  | 21.63778546 |
| COX20   | 9.076290976 | 9.515338815 | C16orf59         | 5.39724323  | 6.183625534 |
| SWSAP1  | 1.381589865 | 1.885519431 | NBEAL1           | 0.547058467 | 0.433884186 |
| TNFAIP8 | 18.30780401 | 16.69475855 | C16orf58         | 12.88005107 | 10.21419319 |
| TNFAIP2 | 0.498189428 | 0.286581435 | NBEAL2           | 1.959606199 | 2.314388941 |
| TNFAIP3 | 2.961815806 | 2.072927369 | C16orf52         | 1.081756415 | 1.176523608 |
| PCTP    | 1.660458874 | 1.231337785 | HIBADH           | 10.80959608 | 11.45904564 |
| TNFAIP1 | 26.84624682 | 24.03737476 | GRIK1            | 0.50318611  | 0.398544597 |
| NUP133  | 13.66713204 | 14.67969745 | ACTR1A           | 89.66306121 | 89.49784427 |
| SHROOM2 | 2.746145425 | 3.411364085 | ACTR1B           | 10.98261914 | 9.661029545 |

|                  |             |             |          |             |             |
|------------------|-------------|-------------|----------|-------------|-------------|
| SHROOM3          | 1.801852177 | 1.742645471 | CNTRL    | 1.87887641  | 2.197672692 |
| SHROOM1          | 2.465534632 | 2.379736015 | SLTM     | 12.30102422 | 12.49186148 |
| SYNGR3           | 8.762767784 | 6.484320166 | SLU7     | 13.6569484  | 14.47919925 |
| SYNGR4           | 0.253550572 | 0.1         | GPALPP1  | 7.067638416 | 7.932297887 |
| SHROOM4          | 0.1         | 0.1         | FITM1    | 0.203591779 | 0.173966433 |
| OXLD1            | 24.48358323 | 26.00608702 | FITM2    | 6.119406831 | 4.436687486 |
| POLD3            | 8.733004728 | 10.36746094 | SLX4     | 3.155957469 | 3.105985494 |
| POLD4            | 24.33409    | 20.45963893 | ORMDL2   | 27.01029415 | 23.48545259 |
| POLD1            | 17.25782141 | 20.3322417  | ORMDL3   | 10.08222293 | 8.996356824 |
| POLD2            | 88.90908826 | 115.4602868 | C16orf95 | 3.335719673 | 2.057391122 |
| TIMM8B           | 41.70600104 | 46.6042014  | C16orf93 | 1.245984051 | 1.505717836 |
| TIMM8A           | 7.521610996 | 10.7240573  | C16orf91 | 15.82349487 | 17.96436837 |
| TPBG             | 37.19492713 | 30.64363388 | ORMDL1   | 8.608693738 | 9.651473772 |
| POLE4            | 35.03275521 | 37.19416617 | GRIN1    | 0.111855609 | 0.1         |
| POLE2            | 6.408967542 | 9.747273739 | SEC23IP  | 7.480978032 | 6.82731593  |
| POLE3            | 33.16973459 | 47.18580877 | ACTR10   | 15.01312251 | 14.97108464 |
| WIPF1            | 0.228037651 | 0.22189498  | GRINA    | 414.4167135 | 280.0968692 |
| WIPF2            | 7.067603295 | 6.397152878 | PRUNE    | 7.272312676 | 7.937497657 |
| WIPF3            | 0.1         | 0.1         | GRIP1    | 0.140476258 | 0.302305542 |
| KIAA0141         | 11.91949182 | 14.17303884 | TMOD1    | 0.1         | 0.122225384 |
| NPIP11           | 0.403467356 | 0.49169306  | PCID2    | 20.07490451 | 23.44793839 |
| LOC10105997<br>6 | 0.830497691 | 0.836360619 | FBXW11   | 19.27938947 | 21.35921393 |
| GJA1             | 179.7385529 | 127.3223239 | TMOD4    | 0.375082405 | 0.324473018 |
| EVA1A            | 20.20836489 | 16.19746834 | TMOD3    | 9.655920112 | 10.33862531 |
| GJA3             | 0.439289938 | 0.377885609 | TMOD2    | 0.388429689 | 0.390744608 |
| EVA1B            | 38.49876994 | 26.09817212 | TTC7B    | 8.027132368 | 7.839142205 |
| ZMIZ1            | 10.01426202 | 8.781200147 | TTC7A    | 2.31513093  | 1.986624895 |
| GJA5             | 0.130020963 | 0.1         | GRIP2    | 1.259248753 | 0.472011194 |
| ZMIZ2            | 25.70743344 | 25.69644693 | LYG1     | 0.640647159 | 0.907157826 |
| EVA1C            | 3.080180581 | 3.065336748 | CNTLN    | 3.216889978 | 3.025155191 |
| PXDC1            | 25.08112908 | 16.34771818 | AUTS2    | 7.676565168 | 6.81024103  |
| NUP214           | 12.92376258 | 11.90180182 | PCIF1    | 22.75283712 | 19.89180761 |
| NUP210           | 0.208111703 | 0.300703729 | USB1     | 11.61505979 | 12.0039743  |
| ARMC9            | 6.187958689 | 5.095596249 | CNTN1    | 0.1         | 0.1         |
| ARMC7            | 5.524827605 | 5.596078243 | CNTN3    | 0.1         | 0.1         |
| ARMC8            | 3.660919842 | 4.360305091 | CNTN4    | 2.335321944 | 1.311296245 |
| ARMC1            | 24.89725647 | 28.58519796 | TTC25    | 0.556513857 | 0.409661317 |
| ARMC2            | 0.572789994 | 0.477296123 | TTC26    | 2.35405956  | 2.488477351 |
| ARMC5            | 2.034415192 | 1.592339662 | TTC23    | 0.329819386 | 0.212275707 |
| ARMC6            | 48.31362481 | 52.50594618 | TTC22    | 0.1         | 0.1         |
| LIPT2            | 0.478811395 | 0.525037321 | USE1     | 13.26989148 | 14.79032983 |
| LIPT1            | 0.994116933 | 1.442874859 | TTC27    | 4.853595254 | 5.134026664 |
| NUP205           | 18.75172701 | 21.36684842 | TTC28    | 3.203437034 | 2.38987749  |
| ARPP19           | 15.16401178 | 20.48048897 | FYCO1    | 2.814539051 | 2.544040971 |
| GJC1             | 2.376776267 | 2.429303998 | LYL1     | 14.5792076  | 16.51732571 |
| GJC3             | 0.1         | 0.1         | TTC36    | 0.559068721 | 0.427783501 |
| GJC2             | 0.798211198 | 0.692011052 | TTC37    | 24.14477055 | 23.54398125 |
| POM121C          | 8.853604187 | 9.354359994 | TTC32    | 3.449656545 | 3.710137827 |
| FDFT1            | 154.7647023 | 168.3947704 | TTC33    | 2.807957953 | 3.145144045 |

|                  |             |             |                  |             |             |
|------------------|-------------|-------------|------------------|-------------|-------------|
| GJB2             | 0.367101681 | 0.258929589 | MIR205HG         | 0.1         | 0.1         |
| GJB4             | 0.118292703 | 0.113061326 | TTC31            | 3.19292862  | 4.257003022 |
| GJB3             | 0.1         | 0.116731694 | OLIG2            | 0.1         | 0.1         |
| GJB5             | 0.330042555 | 0.1         | TTC38            | 4.746360068 | 3.745249308 |
| LOC10192845<br>1 | 1.998771704 | 1.581874892 | LOC10050746<br>2 | 0.195780378 | 0.250455689 |
| TPI1             | 547.4787307 | 603.9390363 | SLC3A2           | 142.3454333 | 104.846709  |
| GJD3             | 0.228528642 | 0.191771811 | CAND2            | 1.242656571 | 0.875487795 |
| SPTY2D1          | 3.696905643 | 3.793890632 | CYTH3            | 8.24899198  | 7.611796909 |
| SLC17A5          | 8.443072227 | 8.084394513 | CYTH2            | 12.71436757 | 11.52452913 |
| SLC17A7          | 1.967871854 | 0.947581754 | CAND1            | 23.61349266 | 22.99817604 |
| TPK1             | 0.334302602 | 0.252087602 | CYTH1            | 5.027492327 | 3.654039032 |
| PBDC1            | 19.79366399 | 20.71131911 | TTC14            | 5.027069093 | 4.69512023  |
| KIAA0196         | 59.27158167 | 58.18095198 | TTC12            | 1.65365042  | 2.131703322 |
| SYVN1            | 27.78194637 | 21.11923893 | TTC13            | 8.19394604  | 9.369222242 |
| LOC10192848<br>2 | 0.154974896 | 0.1         | TTC18            | 0.180942005 | 0.196323464 |
| LOC10192848<br>5 | 0.644603428 | 0.669397534 | USF2             | 53.99678998 | 53.95057126 |
| KIAA0195         | 7.021766039 | 6.135269716 | TTC19            | 9.93016462  | 11.11806916 |
| PCYOX1L          | 1.505189381 | 1.408692652 | USF1             | 23.84997571 | 22.67638306 |
| TPMT             | 4.352012208 | 4.642608658 | TTC17            | 8.378558836 | 8.48451434  |
| TMEM179B         | 48.60760715 | 40.44618502 | SMUG1            | 8.178317782 | 8.79330144  |
| LOC10192849<br>8 | 1.089548133 | 0.974783057 | OPN1SW           | 0.857031358 | 1.586469318 |
| IPO7             | 34.10492984 | 44.28710751 | GPD1L            | 1.609170528 | 2.848730679 |
| IPO4             | 30.62496302 | 36.26168852 | LOC10192974<br>7 | 0.462210098 | 0.414044236 |
| EDC3             | 8.539369398 | 11.65945016 | SMC5             | 2.93053898  | 3.601092298 |
| IPO5             | 77.52261712 | 91.98099239 | SMC6             | 4.574981645 | 5.016264275 |
| EDC4             | 16.41643723 | 17.20911551 | SLC4A2           | 40.8827016  | 37.38242321 |
| NPEPPS           | 17.11377381 | 14.72736076 | SMC3             | 16.36004219 | 20.58658837 |
| IPO8             | 11.18864553 | 12.43462631 | SLC4A3           | 3.177881719 | 2.271910216 |
| IPO9             | 23.31333776 | 22.37079669 | SMC4             | 30.96120456 | 39.46551431 |
| TPM4             | 291.0075097 | 228.989938  | LOC10192974<br>0 | 1.080212773 | 1.383131534 |
| TMEM178B         | 0.651102768 | 0.68673288  | SLC4A5           | 0.541929577 | 0.54994499  |
| TPM3             | 84.95350846 | 86.79762011 | SMC2             | 12.09139925 | 16.66602891 |
| TPM2             | 251.649625  | 231.4724199 | KIAA1468         | 4.011536205 | 3.780945218 |
| SWAP70           | 10.4945418  | 10.04686799 | NAMPT            | 104.195302  | 104.0964336 |
| IPMK             | 2.209223539 | 2.253191449 | KIAA1467         | 0.783714535 | 0.848025002 |
| TPM1             | 115.205455  | 89.92728807 | PRSS8            | 0.1         | 0.119120704 |
| DYRK1A           | 6.384683354 | 6.616847431 | LOC10192975<br>8 | 3.060458798 | 2.861606121 |
| DYRK1B           | 6.368964428 | 4.944780364 | KIAA1462         | 0.211723176 | 0.311396861 |
| ZNF799           | 1.284360642 | 1.619312834 | DEPDC1B          | 11.80148571 | 15.37319702 |
| IPPK             | 4.715530402 | 4.887431581 | ADCY9            | 5.424888231 | 4.180502297 |
| ZNF793           | 0.296978581 | 0.563611963 | HMBS             | 26.74671673 | 34.59967818 |
| ZNF792           | 0.59046231  | 0.369383923 | AC022007.5       | 1.989635272 | 1.410126059 |
| ZNF791           | 2.22385982  | 2.805867032 | PLAC8            | 47.25965434 | 39.6636807  |

|          |             |             |               |             |             |
|----------|-------------|-------------|---------------|-------------|-------------|
| ZNF790   | 1.180993523 | 1.310743898 | FAM171A1      | 15.76951472 | 18.68462779 |
| GLT8D1   | 33.42393807 | 29.81899148 | PLAC9         | 15.07555384 | 16.63528953 |
| GLT8D2   | 0.636334159 | 0.308883151 | NCSTN         | 86.83296667 | 66.1617399  |
| ZNF789   | 1.124625399 | 1.108423494 | FAM171A2      | 6.214235331 | 5.789462086 |
| TPPP     | 0.307045939 | 0.371030108 | PLAC1         | 0.376827408 | 0.132943309 |
| ZNF787   | 48.19203926 | 49.89289631 | POU6F1        | 1.601016147 | 1.358770425 |
| ZNF786   | 1.737387249 | 1.859362227 | SMG1          | 2.796189301 | 2.541849696 |
| ZNF785   | 1.006959506 | 0.702141135 | SMG9          | 27.10229993 | 28.17679981 |
| ZNF784   | 3.145240183 | 3.891187324 | SMG7          | 16.29466374 | 14.68422455 |
| ZNF783   | 3.715015906 | 3.821906236 | LYST          | 3.817216334 | 2.743480025 |
| ZNF782   | 0.705883379 | 0.661474972 | SMG8          | 6.605839646 | 6.710166783 |
| ZNF781   | 0.645637218 | 0.643071815 | SMG5          | 45.68687552 | 44.20165494 |
| AKIRIN2  | 36.32068845 | 37.29016557 | SMG6          | 7.695215932 | 6.03319048  |
| AKIRIN1  | 24.01740741 | 25.26034969 | MYZAP         | 0.229986515 | 0.130937586 |
| PXDNL    | 0.283727992 | 0.243678987 | USO1          | 21.88560792 | 21.45669523 |
| C18orf8  | 17.44043072 | 15.38093009 | ADCY3         | 13.17124045 | 14.46936803 |
| PDCL     | 5.185667957 | 4.861520196 | ADCY2         | 0.107927862 | 0.1         |
| TPP2     | 18.03517931 | 19.28243957 | ADCY1         | 0.54473851  | 0.438325862 |
| ZNF778   | 2.015055387 | 1.775817374 | ADCY8         | 0.868913624 | 0.454205454 |
| ZNF777   | 10.29541711 | 10.80969622 | ADCY7         | 0.182149394 | 0.25250606  |
| TPP1     | 63.90316751 | 45.19466281 | ADCY6         | 6.366434871 | 5.732483045 |
| ZNF776   | 3.751903824 | 3.492588138 | FGD1          | 6.990379894 | 6.989536361 |
| ZNF775   | 3.068644399 | 3.295805086 | ADCY5         | 0.619125363 | 0.376615706 |
| ZNF774   | 0.580506914 | 0.907272387 | FGD3          | 0.1         | 0.121485182 |
| ZNF773   | 1.267144106 | 1.168739482 | FGD4          | 0.106192785 | 0.104421763 |
| ZNF772   | 2.0365488   | 1.804456058 | ARFRP1        | 10.70351035 | 11.0266358  |
| ZNF771   | 2.563668805 | 4.153589293 | FGD6          | 0.267801282 | 0.391545449 |
| ZNF770   | 3.399401952 | 4.852519822 | USP1          | 26.67573575 | 30.6398276  |
| KIAA0100 | 26.17695571 | 23.91809675 | PCGF1         | 6.31273003  | 8.264540699 |
| ZNF768   | 26.49079988 | 27.41989345 | GPAT2         | 0.232233604 | 0.194417222 |
| ZNF766   | 5.775349586 | 4.775735232 | PCGF6         | 4.107004323 | 5.007075794 |
| ZNF765   | 2.324699648 | 2.142326825 | PCGF5         | 0.597589965 | 0.434691949 |
| TNPO1    | 29.2713795  | 29.90448426 | KIDINS220     | 8.166880802 | 6.520047236 |
| ZNF764   | 2.589796536 | 2.872775655 | PCGF2         | 22.09428545 | 17.52534567 |
| ZNF763   | 0.434661504 | 0.423291331 | PCGF3         | 7.258542556 | 8.338541458 |
| TNPO2    | 28.33039737 | 28.69281269 | LOC101927160  | 0.416133531 | 0.400966866 |
| TNPO3    | 23.42297652 | 24.11021909 | VMA21         | 13.24139143 | 16.51667489 |
| TPRN     | 6.892565291 | 7.445519033 | JKAMP         | 15.02649746 | 15.66416221 |
| ILKAP    | 9.274075298 | 12.52328299 | FGF1          | 2.927110185 | 1.797060335 |
| ZNF761   | 4.638952974 | 3.772428133 | NDUFC2-KCTD14 | 10.0168078  | 11.58152763 |
| EDF1     | 193.167157  | 206.178701  | FGF2          | 29.68017055 | 22.66096319 |
| WIPI1    | 14.92393506 | 10.22184888 | RIMS2         | 2.463421675 | 1.971538693 |
| WIPI2    | 23.41846938 | 23.25700573 | FGF5          | 16.0642447  | 11.78786308 |
| ZNF75D   | 3.834234576 | 3.748163502 | RIMS4         | 0.1         | 0.107119802 |
| ZNF75A   | 2.374702805 | 3.243573405 | RIMS3         | 1.530115385 | 1.146785157 |
| NPEPL1   | 9.848294535 | 7.926274877 | FGF9          | 0.168809638 | 0.20645125  |
| PDHB     | 28.95459153 | 37.56580466 | CSGALNACT1    | 19.64280012 | 18.64708309 |
| ZNF749   | 1.536686048 | 1.632398125 | USP8          | 6.900184238 | 7.649410785 |



|          |             |             |            |             |             |
|----------|-------------|-------------|------------|-------------|-------------|
| ZNF747   | 4.201022729 | 3.498428362 | USP7       | 12.42128893 | 15.43805698 |
| ZNF746   | 4.285399958 | 4.993590905 | USP5       | 41.77824163 | 42.26250101 |
| ZNF740   | 7.777949534 | 8.50196809  | USP4       | 21.80100672 | 18.70110372 |
| KIAA0101 | 22.61111491 | 32.81482939 | MAMSTR     | 0.869268662 | 1.198543914 |
| ZNF736   | 0.577103564 | 0.882257926 | USP3       | 3.726395788 | 4.318905859 |
| TPT1     | 180.7315899 | 222.7035244 | CSGALNACT2 | 9.936439077 | 8.126740811 |
| TMEM183B | 3.327922251 | 3.557193682 | USP2       | 1.282924871 | 1.431534494 |
| TMEM183A | 14.39191567 | 16.70305455 | CHD1L      | 14.85194015 | 14.72938372 |
| ZNF846   | 0.974385204 | 0.967966943 | PYGO1      | 0.879361936 | 1.000965579 |
| ZNF845   | 3.262975435 | 3.190472989 | PYGO2      | 19.45920227 | 19.1953302  |
| ZNF844   | 1.403347792 | 1.060251665 | RTN4R      | 0.235360284 | 0.177319784 |
| PDK3     | 1.531007864 | 1.539761047 | HMMR       | 14.98575272 | 19.88119336 |
| ZNF843   | 0.125807887 | 0.118427306 | FGGY       | 1.897911396 | 1.159833319 |
| ZNF841   | 2.512598002 | 1.956622352 | SMN2       | 3.035821549 | 5.089940044 |
| PDK2     | 6.133673356 | 5.247761836 | SMN1       | 4.735652407 | 8.865636807 |
| PDK1     | 2.269224579 | 2.757445563 | KIAA1407   | 1.337242022 | 1.185862468 |
| PDHX     | 9.819131134 | 10.10598994 | SLC4A11    | 3.47499076  | 3.614738015 |
| ZNF839   | 2.633206705 | 3.257990426 | DAB2       | 57.05332342 | 32.00211162 |
| ZNF837   | 1.888779827 | 1.140023351 | UFSP2      | 9.271726074 | 9.626916996 |
| ZNF836   | 1.191085925 | 0.923572846 | KIAA1430   | 9.207867632 | 12.79421676 |
| HSBP1L1  | 4.810249112 | 5.095347712 | UFSP1      | 1.508317749 | 1.403509856 |
| ZNF830   | 5.367238704 | 5.607039758 | KIAA1429   | 28.5808212  | 29.15776894 |
| TMEM185B | 5.428111768 | 5.228715128 | PAAF1      | 8.009000375 | 8.559684465 |
| TMEM185A | 5.569518245 | 4.227379053 | CTDSPL     | 6.012300208 | 6.669539195 |
| STXBP3   | 16.16483755 | 15.03844167 | CTDSP1     | 25.99686475 | 26.3387089  |
| STXBP4   | 0.460307244 | 0.566668542 | DAD1       | 179.6561352 | 175.938056  |
| STXBP1   | 11.7160279  | 11.56393943 | CTDSP2     | 60.16478318 | 53.12544551 |
| STXBP2   | 0.611967978 | 0.273157415 | SMPX       | 0.1         | 0.1         |
| GSKIP    | 4.476489674 | 4.201423413 | PLAG1      | 1.523031708 | 1.77323099  |
| ZNF829   | 1.142742245 | 1.4490128   | HN1L       | 23.72704017 | 28.02889568 |
| ZNF827   | 3.912483514 | 3.361316969 | NLGN4X     | 0.443770555 | 0.399339624 |
| ZNF823   | 2.727961916 | 2.424511735 | SMOX       | 15.03906716 | 16.16402547 |
| STXBP5   | 5.863759647 | 4.99744102  | MFAP5      | 0.117480241 | 0.1         |
| ZNF821   | 1.803320557 | 1.351972822 | MFAP1      | 20.24591448 | 21.33519644 |
| TMEM184A | 1.027110105 | 0.992482328 | KIAA1432   | 7.113687488 | 6.048911327 |
| TMEM184C | 7.329522241 | 6.857995989 | MFAP3      | 5.862646324 | 6.455827949 |
| TMEM184B | 44.82158714 | 34.98888783 | MFAP2      | 100.2816556 | 97.05601186 |
| TPX2     | 110.0034797 | 135.9971418 | ZACN       | 6.418398551 | 5.924309232 |
| ZNF816   | 2.14249651  | 1.342323731 | PDCD2L     | 3.599308812 | 5.417471144 |
| ZNF814   | 1.29067068  | 1.469703414 | TIAL1      | 12.35437418 | 13.07646993 |
| ZNF813   | 0.931121193 | 1.481731118 | DAG1       | 67.53251038 | 61.40053591 |
| ZCCHC11  | 8.206565694 | 7.638021463 | BRICD5     | 1.539792533 | 1.583766647 |
| ZCCHC10  | 5.523611768 | 6.609193976 | SLC51A     | 0.207116035 | 0.227471361 |
| ZCCHC17  | 13.73048464 | 14.32867901 | TIAM2      | 0.170251896 | 0.168971573 |
| ZCCHC14  | 7.136086709 | 7.147408506 | TIAM1      | 3.919634196 | 3.586274791 |
| ZNF808   | 1.323859741 | 1.063484836 | HMSD       | 0.1         | 0.1         |
| ZNF805   | 1.008095598 | 1.06710052  | GINM1      | 20.4307973  | 17.12518538 |
| ZNF800   | 2.903793271 | 3.193938035 | RPAP1      | 7.313710164 | 7.343903068 |
| ZCCHC24  | 0.384347147 | 0.355666258 | RPAP2      | 3.205057043 | 4.224222846 |
| EDN1     | 0.941115913 | 0.453277773 | RPAP3      | 10.30144414 | 10.8952374  |

|             |             |             |            |             |             |
|-------------|-------------|-------------|------------|-------------|-------------|
| EDN2        | 0.1         | 0.1         | PDCD11     | 18.4999119  | 22.55580138 |
| PPHLN1      | 4.072144494 | 5.335231646 | PDCD10     | 21.91820595 | 28.07498576 |
| CYP7B1      | 0.121691556 | 0.146464509 | SMU1       | 12.48156227 | 13.2249842  |
| VWA8        | 1.689012522 | 2.156757538 | SMTN       | 12.39158756 | 11.73942683 |
| VWA9        | 10.39079051 | 12.89721418 | ADCK2      | 10.20896252 | 10.40916547 |
| VWA1        | 2.296694905 | 2.408930713 | ADCK1      | 6.076489786 | 5.662464489 |
| VWA2        | 0.1         | 0.1         | ADCK5      | 4.116313581 | 3.880178581 |
| VWA7        | 0.153484499 | 0.142432128 | ADCK4      | 9.05271699  | 8.96737333  |
| PDPR        | 5.568874226 | 5.414610658 | ADCK3      | 2.971042845 | 3.373014662 |
| TRAM1L1     | 0.971407705 | 0.539200784 | DCP1A      | 5.194955687 | 5.328698955 |
| PDP1        | 35.70330633 | 32.14051143 | DCP1B      | 10.50985041 | 8.477230362 |
| MPHOSPH9    | 2.692038186 | 2.668112839 | RPAIN      | 7.20561927  | 8.653741409 |
| HIST3H2A    | 8.479238222 | 8.775248541 | HMX3       | 0.1         | 0.1         |
| PDP2        | 1.828754097 | 2.104519788 | C2CD5      | 5.702802427 | 5.221267592 |
| TRIML2      | 0.25685772  | 0.144799718 | C2CD3      | 2.978205169 | 2.257612932 |
| F2RL1       | 9.344191845 | 7.807043198 | C2CD2      | 3.603252961 | 3.425442028 |
| MPHOSPH8    | 7.6433303   | 8.103056348 | GPR75-ASB3 | 1.355619987 | 1.818360165 |
| MPHOSPH6    | 6.422862048 | 9.937871501 | PDCD1LG2   | 4.231271717 | 1.689531637 |
| RALBP1      | 14.67436835 | 15.05016773 | HMX2       | 0.195733311 | 0.168355343 |
| VWDE        | 0.1         | 0.1         | MATN3      | 1.14586388  | 0.832405139 |
| SPECC1      | 24.52660907 | 22.68064475 | MATN2      | 66.27151702 | 53.77372415 |
| MGEA5       | 22.23601443 | 22.05326632 | CHRAC1     | 25.49471367 | 28.08357824 |
| TSGA10      | 0.387099162 | 0.441656794 | TIAF1      | 2.835586629 | 2.976617961 |
| CORO7-PAM16 | 2.116698013 | 2.51345313  | GIN51      | 8.929663676 | 11.98727612 |
| MRFAP1L1    | 18.70064565 | 22.02563465 | GIN52      | 11.59091804 | 12.45424348 |
| FAM86C1     | 1.724246462 | 2.278908861 | GIN53      | 5.075676465 | 6.75554048  |
| FAM86B2     | 0.361353545 | 0.224407489 | GIN54      | 11.40728132 | 15.90920334 |
| IQCE        | 6.603362183 | 6.487539823 | GRHL3      | 0.208646797 | 0.203434412 |
| FAM86B1     | 0.587530752 | 0.698742172 | GRHL1      | 0.679434808 | 0.614636147 |
| IQCC        | 2.95471474  | 3.675146413 | GRHL2      | 0.179451389 | 0.16382097  |
| IQCD        | 2.946306266 | 2.85687943  | ZWILCH     | 7.352322424 | 9.960188941 |
| IQCG        | 2.055650373 | 2.301336699 | LZIC       | 9.027445112 | 10.10313694 |
| IQCH        | 0.259322152 | 0.266263071 | CCDC28B    | 7.789539191 | 9.116873125 |
| IQCK        | 1.699349291 | 1.47823335  | CCDC28A    | 3.08650389  | 3.149854572 |
| THRAP3      | 29.8031895  | 29.46900476 | AZI2       | 10.32262631 | 8.478317353 |
| PDXX        | 34.98287884 | 28.18823936 | AZI1       | 2.770057341 | 3.451697248 |
| PDXP        | 20.28456098 | 28.51727643 | MATR3      | 39.27667675 | 44.43560404 |
| ERICH1      | 22.5833582  | 25.57132744 | PRTN3      | 0.255698133 | 0.174114218 |
| ERICH2      | 1.779033667 | 0.910994127 | DAP3       | 65.32314811 | 73.06279219 |
| S100PBP     | 8.287778684 | 8.158769297 | STEAP1B    | 0.499932848 | 0.614006922 |
| CRAMP1L     | 3.112943862 | 2.836256752 | TCTEX1D2   | 13.25997001 | 12.11872836 |
| MTMR1       | 13.11431899 | 15.23704355 | PMAIP1     | 14.75154816 | 9.028657767 |
| MTMR2       | 7.729208507 | 8.271092549 | DARS       | 18.75950258 | 18.55123253 |
| MTMR3       | 6.206817144 | 5.182296789 | GRHPR      | 209.5877404 | 220.0819215 |
| MEAF6       | 9.088513175 | 10.72101151 | RABEPK     | 23.10790583 | 29.67507844 |
| MTMR8       | 0.275708941 | 0.30909902  | OASL       | 83.0476264  | 28.67229299 |
| MTMR9       | 4.673620387 | 5.519374534 | TOP1MT     | 28.77879436 | 36.71164044 |
| MTMR4       | 3.59588439  | 4.06772216  | PLAUR      | 74.62711892 | 66.53731255 |
| MTMR6       | 11.01614255 | 11.4287973  | SUPV3L1    | 15.38329457 | 20.70471664 |

|              |             |             |              |             |             |
|--------------|-------------|-------------|--------------|-------------|-------------|
| MTMR7        | 0.778009856 | 1.019110227 | ALDH1A3      | 54.90443635 | 42.72221554 |
| MLLT11       | 9.512858803 | 10.05251261 | RABEP1       | 23.95988859 | 25.34902796 |
| MLLT10       | 7.517268334 | 8.434792166 | OAS1         | 85.03553743 | 23.30099182 |
| SASS6        | 3.11128202  | 4.504872772 | RABEP2       | 5.819197597 | 4.932003225 |
| NAPEPLD      | 0.980082619 | 0.866642093 | OAS2         | 185.9109287 | 55.59376766 |
| LITAF        | 2.328737395 | 1.930767503 | OAS3         | 126.4230537 | 45.04176252 |
| TRIOBP       | 14.3616369  | 12.008891   | LOC101929728 | 0.282157353 | 0.43816561  |
| HIST2H2AC    | 2.596514454 | 3.580230694 | IGLV5-52     | 0.285209544 | 0.49672905  |
| EEA1         | 4.210794332 | 4.434619614 | OGFRL1       | 3.769051163 | 3.869804535 |
| VWA5A        | 0.114687949 | 0.110487466 | ALDH1B1      | 15.78691653 | 25.7155154  |
| HIST2H2BE    | 1.946221719 | 1.368176621 | LURAP1       | 1.954399286 | 1.303704689 |
| SUMF2        | 84.63046659 | 77.31241054 | SNCA         | 0.407021544 | 0.411521769 |
| SUMF1        | 10.79797235 | 13.50608227 | SLC4A7       | 9.919784864 | 9.569195535 |
| FSTL1        | 179.2642607 | 143.3279172 | SLC4A8       | 0.457068599 | 0.402167158 |
| FSTL3        | 24.63771983 | 21.1510501  | SUV420H2     | 3.5874179   | 4.309039211 |
| SLC16A1      | 46.28550383 | 49.02804381 | SUV420H1     | 3.532351058 | 3.747347718 |
| P2RY11       | 1.702947848 | 2.051337017 | NSDHL        | 60.81606297 | 62.34082484 |
| LOC101928120 | 4.752353162 | 4.221574019 | DAXX         | 14.26943277 | 15.01352801 |
| ZNF699       | 0.569588136 | 0.400000392 | SND1         | 74.29495372 | 69.47708788 |
| ZNF697       | 0.723210992 | 0.763828736 | SLC5A6       | 8.927202291 | 11.22713825 |
| ZNF696       | 4.113308209 | 5.680748432 | PADI2        | 0.171443425 | 0.176517877 |
| ZNF695       | 1.03841513  | 1.473044351 | TBPL1        | 9.301702195 | 11.14155992 |
| PECR         | 1.986564756 | 2.305781103 | PADI1        | 0.154017444 | 0.109642362 |
| ZNF692       | 4.837918557 | 6.493796085 | SLC5A1       | 0.120530044 | 0.1         |
| ZNF691       | 4.768557806 | 4.654403893 | SLC5A2       | 0.122855819 | 0.13263895  |
| KPNA6        | 13.58633448 | 13.59336141 | OAZ1         | 346.0338522 | 362.5287772 |
| SLC16A6      | 0.480932246 | 0.578331852 | SLC5A3       | 3.981984674 | 3.003188887 |
| KPNA7        | 0.13016915  | 0.1         | OAZ2         | 21.71021281 | 24.66810902 |
| KPNA4        | 10.36762238 | 10.62398791 | OAZ3         | 4.609862826 | 3.947421971 |
| ZNF689       | 4.514542951 | 5.297775677 | HMGXB4       | 7.591445021 | 8.852163885 |
| SLC16A9      | 0.38666368  | 0.360505807 | HMGXB3       | 28.69914915 | 27.58097217 |
| KPNA5        | 1.355309129 | 1.6869162   | B3GALNT2     | 6.665030789 | 7.475082744 |
| ZNF688       | 5.241453186 | 4.840146303 | B3GALNT1     | 1.227204307 | 1.230857579 |
| ZNF687       | 10.40737138 | 9.455104703 | NAPSA        | 0.323927918 | 0.126648108 |
| KPNA2        | 157.2132558 | 176.9155254 | ERLIN1       | 28.07725064 | 25.38314205 |
| SLC16A2      | 68.88745512 | 56.84753507 | AZU1         | 0.498748836 | 0.913468556 |
| SLC16A3      | 2.41503055  | 1.859617849 | SNF8         | 26.93150796 | 28.21090023 |
| KPNA3        | 18.8298636  | 19.70833773 | ERLIN2       | 16.90042297 | 17.31008871 |
| SLC16A4      | 0.158241342 | 0.183170776 | FGFBP3       | 0.241832659 | 0.38934607  |
| ZNF684       | 1.834186642 | 1.921983365 | ELOVL1       | 151.3210295 | 137.3894785 |
| KPNA1        | 19.87807066 | 21.61984091 | FGFBP1       | 0.864551538 | 0.236475961 |
| SLC16A5      | 1.993605254 | 1.338536433 | FGFBP2       | 0.1         | 0.1         |
| ZNF681       | 0.363874425 | 0.471112945 | ELOVL4       | 2.188237604 | 1.906219203 |
| ZNF680       | 1.164382897 | 1.20645449  | ELOVL5       | 50.93929725 | 46.15790947 |
| ACAP3        | 7.245185305 | 7.03197978  | RIPK2        | 33.72262529 | 34.46770909 |
| ACAP2        | 4.352136813 | 4.442454587 | ELOVL2       | 3.07119478  | 3.742038898 |
| ACAP1        | 0.45214183  | 0.307064723 | ELOVL3       | 0.1         | 0.178312807 |
| ZNF678       | 0.687191082 | 0.7526706   | RIPK4        | 2.528507524 | 1.728617833 |

|                  |             |             |                     |             |             |
|------------------|-------------|-------------|---------------------|-------------|-------------|
| ZNF677           | 0.799029493 | 0.705315623 | ELOVL6              | 24.05394964 | 18.60333997 |
| ZNF675           | 2.366715038 | 3.238862894 | ELOVL7              | 2.883338569 | 2.762305583 |
| KIAA0408         | 0.343002034 | 0.28720591  | POU5F1              | 0.246627573 | 0.180534447 |
| KPNB1            | 81.1401006  | 88.53728523 | SLC29A4             | 2.418130311 | 1.921989483 |
| ZNF674           | 1.230203777 | 0.970457089 | SLC29A1             | 28.67842882 | 46.15050408 |
| ZNF672           | 11.37144531 | 13.0248406  | SLC29A3             | 0.119574709 | 0.141930105 |
| ZNF671           | 2.533215109 | 2.675560429 | SLC29A2             | 1.519858936 | 1.766529368 |
| ZNF670           | 1.312773974 | 1.531456627 | RECQL4              | 37.55229637 | 43.50289622 |
| BEAN1            | 0.1         | 0.112729638 | RECQL5              | 3.022948705 | 3.151802419 |
| TSACC            | 0.515056807 | 0.593930309 | UTP6                | 18.66660649 | 23.11095732 |
| PEF1             | 37.71807979 | 38.20633645 | UTP3                | 11.15186355 | 13.94992022 |
| THADA            | 4.099410668 | 4.726509186 | YLPM1               | 5.756732383 | 6.071900908 |
| ACAT2            | 36.53173437 | 40.86552601 | LOC10192945<br>1    | 1.05323444  | 1.461253805 |
| ACAT1            | 55.04005484 | 60.4430823  | CSE1L               | 93.07373555 | 115.9029345 |
| ZNF669           | 3.327276297 | 1.842301745 | STK19               | 3.481869831 | 2.905182096 |
| ZNF668           | 10.18199302 | 9.253778529 | HNMT                | 0.1         | 0.1         |
| ZNF667           | 2.521753835 | 2.519184751 | STK10               | 19.36486961 | 19.55610278 |
| ZNF665           | 0.652505225 | 0.719926812 | STK11               | 27.81885409 | 27.08056295 |
| ZNF664           | 8.870682746 | 12.15303041 | STK16               | 6.598075055 | 6.821681812 |
| KIAA0430         | 4.585483966 | 4.349576511 | LOC10192947<br>9    | 0.421679734 | 0.375622287 |
| EEF2             | 1120.194537 | 1331.073451 | KIAA1731            | 2.700144637 | 3.301744348 |
| LOC10192817<br>0 | 1.965324689 | 1.875834795 | UTRN                | 6.461967589 | 4.80385347  |
| ZNF658           | 0.583871503 | 0.479199791 | STK39               | 4.11456111  | 4.31473116  |
| ZNF655           | 7.195682069 | 7.983631208 | FHIT                | 0.910249274 | 1.291097079 |
| ZNF654           | 3.624978453 | 3.058360084 | STK35               | 5.486279886 | 5.426430784 |
| ZNF653           | 2.859911589 | 3.014541628 | STK36               | 3.11075283  | 2.963804927 |
| ZNF652           | 0.484255007 | 0.400187735 | STK38               | 11.50464574 | 10.38496546 |
| POMT2            | 5.194934426 | 4.947965501 | SRD5A1              | 8.310569643 | 8.016620752 |
| POMT1            | 28.07857929 | 23.95423036 | SRD5A3              | 3.447179286 | 3.952995213 |
| NRARP            | 0.159463499 | 0.170763385 | KIAA1755            | 1.8662786   | 1.077684667 |
| WISP2            | 0.887683042 | 0.81580748  | STK24               | 32.4700729  | 32.91253103 |
| SUMO1            | 41.6746303  | 48.19852588 | STK25               | 34.31279538 | 37.60966668 |
| ZNF649           | 2.337752556 | 2.674866199 | FHL1                | 52.66289173 | 48.86958067 |
| SUMO3            | 59.08268354 | 59.51631927 | FHL2                | 31.66953931 | 25.25126832 |
| SUMO2            | 96.10751936 | 117.2284834 | FHL3                | 7.561921497 | 7.017379208 |
| ZNF646           | 5.702745409 | 5.099152241 | CAPZB               | 100.0335614 | 95.20546107 |
| ZNF644           | 8.577579764 | 8.341822774 | TNFSF12-<br>TNFSF13 | 1.744380548 | 1.572622477 |
| ZNF641           | 5.256255703 | 4.524524222 | DBF4                | 7.665978142 | 11.09438045 |
| OVGP1            | 0.378062143 | 0.629443942 | SNPH                | 1.570231374 | 1.016889653 |
| NSMCE4A          | 12.66338071 | 14.4042863  | TMPPE               | 0.570976069 | 0.482991895 |
| ZNF639           | 8.945338562 | 10.72471471 | SNRK                | 1.885640169 | 1.818757415 |
| ZNF638           | 6.223100727 | 5.943824715 | OGFOD3              | 4.70458914  | 3.913803037 |
| LOC10192819<br>2 | 0.276225499 | 0.18807977  | OGFOD1              | 18.93663851 | 19.54373015 |
| ZNF630           | 0.1         | 0.1         | OGFOD2              | 3.496814264 | 4.736770772 |
| C2orf81          | 1.614954241 | 1.447971045 | FNDC8               | 0.898267931 | 0.98916563  |

|         |             |             |          |             |             |
|---------|-------------|-------------|----------|-------------|-------------|
| C2orf82 | 0.374874481 | 0.296265429 | FNDC5    | 0.99157307  | 0.479511271 |
| CKMT2   | 0.328357261 | 0.36495833  | FNDC4    | 7.001964984 | 4.650750488 |
| ZNF629  | 6.487105376 | 6.049805192 | FNDC1    | 1.154727498 | 0.490703323 |
| ZNF628  | 5.690805476 | 4.795830238 | TAGLN2   | 438.8824947 | 449.0944518 |
| ZNF627  | 6.104145488 | 5.293701339 | CAPSL    | 0.410465799 | 0.432517426 |
| ZNF626  | 0.833871521 | 1.020042558 | SNX3     | 173.8386968 | 170.1149283 |
| CDC37L1 | 6.096731618 | 7.068809782 | SNX4     | 9.566220824 | 10.01132661 |
| ZNF625  | 0.864439037 | 0.602157635 | SNX1     | 5.73560455  | 6.086815515 |
| ZNF624  | 1.309534704 | 1.20678796  | SNX2     | 14.12903682 | 13.39859769 |
| ZNF623  | 12.72236801 | 11.32717973 | SNX9     | 37.57126596 | 35.17996419 |
| ZNF622  | 28.74689209 | 27.6794687  | SNX7     | 37.55915893 | 38.807833   |
| ZNF621  | 1.416695102 | 1.556130772 | SNX8     | 31.41144237 | 25.03870533 |
| ZNF620  | 0.231001059 | 0.166812259 | SNX5     | 27.17226459 | 33.1604722  |
| C2orf70 | 0.232867716 | 0.19486999  | SNX6     | 21.62267189 | 20.70653192 |
| C2orf72 | 0.129014955 | 0.131075816 | SNW1     | 30.89277109 | 33.91921539 |
| ZNF619  | 1.440998545 | 1.163886219 | CRIPAK   | 0.3806281   | 0.450653833 |
| ZNF618  | 0.675779543 | 0.657653985 | CCDC122  | 0.927496696 | 1.097055736 |
| C2orf74 | 0.299237879 | 0.1         | CCDC121  | 0.352628648 | 0.65402888  |
| C2orf76 | 2.945387962 | 3.77009418  | CCDC120  | 2.827260224 | 2.635835438 |
| ZNF616  | 2.057818019 | 1.826839924 | CCDC127  | 14.3009672  | 14.51984757 |
| ZNF615  | 1.153752685 | 1.015569595 | CCDC126  | 0.604177375 | 0.744985502 |
| ZNF614  | 2.210937259 | 2.844777908 | CCDC125  | 2.801858382 | 3.348613314 |
| ZNF613  | 2.210034764 | 1.55902663  | CCDC124  | 63.93717447 | 82.28002115 |
| ZNF611  | 1.262322933 | 1.149604614 | CCDC112  | 2.797705964 | 4.915529047 |
| ZNF610  | 1.040813761 | 0.509608725 | CCDC110  | 0.799137268 | 0.509597418 |
| LPGAT1  | 3.482325403 | 3.015776053 | DBNL     | 70.03981652 | 58.68469978 |
| SRGAP2D | 0.377030022 | 0.390889007 | CCDC115  | 2.626140241 | 2.805565811 |
| SRGAP2C | 1.607547724 | 1.271394721 | CCDC114  | 0.229071496 | 0.284318838 |
| C2orf69 | 5.49301078  | 5.612384136 | CCDC113  | 0.159125126 | 0.135180355 |
| C2orf68 | 4.594729473 | 5.083577308 | CCDC117  | 9.055770123 | 7.749335696 |
| ZNF727  | 0.428545625 | 0.48120487  | CSDE1    | 55.43599963 | 60.22643536 |
| ZNF726  | 0.390969474 | 0.49662805  | DBN1     | 86.69112451 | 94.41234206 |
| ZNF721  | 1.760846451 | 1.878812317 | STK40    | 23.11385536 | 21.35246141 |
| ZNF720  | 0.397752148 | 0.552931508 | CAPS2    | 0.34173606  | 0.413825433 |
| PELO    | 15.02709636 | 14.68359684 | CCDC101  | 11.24853641 | 11.08967043 |
| SRGAP2B | 2.051499306 | 1.556743009 | CCDC104  | 9.939511412 | 10.41059564 |
| PHYKPL  | 7.676598422 | 7.160717697 | CCDC103  | 2.386435031 | 2.021870448 |
| SCAF11  | 10.35134467 | 10.02324975 | CCDC107  | 25.04322042 | 17.93940424 |
| C2orf50 | 0.149196285 | 0.135127051 | CCDC106  | 26.47845078 | 26.06755984 |
| THAP2   | 1.205574696 | 1.517855525 | SERTAD3  | 19.14203707 | 18.23653568 |
| THAP1   | 6.237298987 | 8.898523956 | SERTAD4  | 0.894127015 | 0.959677421 |
| THAP4   | 26.39797204 | 34.97200817 | SERTAD1  | 18.76796924 | 15.6456879  |
| THAP3   | 8.432042513 | 8.829080632 | SERTAD2  | 6.178184723 | 5.567436957 |
| THAP6   | 1.653601631 | 2.069785236 | ALDH4A1  | 5.689791552 | 4.979368592 |
| THAP5   | 4.407071681 | 4.665435837 | EPPK1    | 0.103245535 | 0.1         |
| ZNF718  | 0.85537465  | 0.969566507 | KIAA1715 | 4.524644752 | 3.973493155 |
| ZNF717  | 0.90239707  | 0.84143397  | CCDC167  | 31.05325681 | 37.0149673  |
| THAP8   | 9.863993426 | 9.287157869 | DBR1     | 6.589081436 | 7.022405732 |
| THAP7   | 37.99682523 | 40.44961232 | CCDC169  | 0.446630705 | 0.873439662 |
| C2orf54 | 0.1         | 0.1         | CAPN8    | 0.1         | 0.1         |

|          |             |             |          |             |             |
|----------|-------------|-------------|----------|-------------|-------------|
| ZNF714   | 0.854968603 | 0.849632332 | CAPN7    | 9.424588175 | 9.534894373 |
| THAP9    | 0.498833479 | 0.697107677 | CAPN5    | 3.955250693 | 2.405191752 |
| ZNF713   | 0.452212047 | 0.656861575 | CAPN2    | 289.8385869 | 265.1084653 |
| ZNF710   | 2.885292568 | 2.406950073 | CAPN1    | 62.75710838 | 53.4152924  |
| APH1A    | 109.2527051 | 99.30152119 | ARHGEF40 | 3.462373057 | 2.339084477 |
| C2orf44  | 3.6888273   | 5.253555188 | CCDC154  | 0.147422434 | 0.184651224 |
| ZNF709   | 0.715059005 | 0.584594128 | CCDC153  | 0.322966854 | 0.354723888 |
| C2orf47  | 8.621108922 | 10.03593737 | CCDC159  | 1.707125834 | 1.167458019 |
| ZNF708   | 0.411474056 | 0.628195721 | CCDC157  | 1.611197727 | 1.223064693 |
| COMMD8   | 6.501927899 | 5.170236595 | CCDC151  | 0.869292394 | 1.078420857 |
| APH1B    | 4.399330577 | 4.142936786 | CCDC150  | 1.072764752 | 1.479077548 |
| ZNF707   | 7.663651398 | 7.224716811 | CCDC142  | 1.309283009 | 1.228469679 |
| COMMD9   | 14.59884327 | 13.70784643 | ARHGEF26 | 0.503485955 | 0.577818394 |
| ZNF706   | 30.51224892 | 32.80009139 | CCDC149  | 4.461247033 | 3.460574385 |
| C2orf43  | 0.1         | 0.109360123 | CCDC148  | 0.337303795 | 0.282473059 |
| ZNF704   | 1.321875634 | 0.941649592 | ARHGEF25 | 8.92608769  | 7.938008797 |
| C2orf42  | 3.158220303 | 1.830420192 | ARHGEF28 | 8.180582754 | 6.558776415 |
| ZNF703   | 5.572328623 | 5.440604422 | CCDC146  | 0.349391069 | 0.389363433 |
| ZNF701   | 1.66660586  | 1.29226464  | ARHGEF33 | 0.16035232  | 0.220659462 |
| ZNF700   | 4.630738737 | 3.987151505 | CCDC134  | 3.191007877 | 3.556804016 |
| C2orf49  | 3.000048406 | 3.884945805 | CCDC132  | 3.803045013 | 3.66848723  |
| C2orf48  | 0.1         | 0.456674675 | ARHGEF35 | 0.1         | 0.1         |
| INTS1    | 26.82056646 | 24.77980084 | ARHGEF37 | 0.920781771 | 0.483188672 |
| CRADD    | 1.875488399 | 1.992913911 | CCDC138  | 1.510540102 | 2.982002886 |
| INTS3    | 16.85954138 | 18.11671744 | CCDC137  | 18.55021643 | 22.38464132 |
| INTS2    | 1.07798574  | 1.340084101 | ARHGEF39 | 3.484109416 | 4.446070603 |
| INTS5    | 15.91469619 | 15.4683897  | CCDC136  | 0.161539063 | 0.143940022 |
| PEMT     | 28.43254933 | 34.39527493 | CCDC130  | 9.885694184 | 9.483287597 |
| INTS4    | 7.787931112 | 7.297375526 | SOBP     | 0.425112292 | 0.43927591  |
| INTS7    | 9.340076172 | 9.17269258  | DNPH1    | 46.24994241 | 62.18734966 |
| INTS6    | 4.818414707 | 5.223119267 | GPER1    | 0.362291873 | 0.199883315 |
| INTS9    | 13.61760668 | 14.18798833 | ARHGEF11 | 6.147314053 | 5.578836349 |
| INTS8    | 19.2445486  | 21.28625545 | ARHGEF10 | 26.92752523 | 26.73204627 |
| TMEM151A | 0.88029586  | 0.525190047 | ARHGEF12 | 12.50509178 | 11.50110652 |
| PEPD     | 47.55400225 | 35.42250451 | ARHGEF17 | 2.420618925 | 2.117793501 |
| ACADM    | 24.62512524 | 31.32069607 | ARHGEF16 | 1.423827306 | 0.981369651 |
| ACADS    | 1.48211535  | 1.144906089 | ARHGEF19 | 3.941890407 | 3.039121783 |
| ACAD8    | 3.601418354 | 3.355914272 | ARHGEF18 | 8.010184351 | 7.142655001 |
| TMEM150A | 6.590136287 | 6.824799446 | BLVRB    | 45.25391363 | 29.35065674 |
| ACAD9    | 29.17390421 | 27.51570961 | BLVRA    | 24.3291913  | 23.17730679 |
| MINK1    | 40.12886478 | 36.37548634 | DNPEP    | 20.74839516 | 14.40209853 |
| COMMD2   | 8.987509337 | 8.838048319 | CCDC183  | 0.796316649 | 0.856582643 |
| COMMD3   | 21.55334049 | 23.68747934 | CCDC176  | 1.555170991 | 1.724213329 |
| COMMD1   | 13.9439588  | 15.23941425 | SOD2     | 398.0670012 | 284.7447504 |
| COMMD6   | 15.08967512 | 15.94662779 | SOD1     | 81.09236348 | 86.03865828 |
| TMEM150C | 0.375165662 | 0.355415339 | EEDP1    | 5.98566846  | 5.552929485 |
| COMMD7   | 7.014227397 | 5.592097419 | BRMS1L   | 2.815899468 | 3.742929688 |
| COMMD4   | 37.17479079 | 32.3726635  | CCDC174  | 4.610634521 | 4.197902817 |
| COMMD5   | 12.1829524  | 12.41055869 | CCDC173  | 0.363468901 | 0.407835404 |
| KXD1     | 67.12758977 | 80.04352019 | CCDC171  | 0.471910708 | 0.52322203  |

|                  |             |             |                  |             |             |
|------------------|-------------|-------------|------------------|-------------|-------------|
| C2orf15          | 0.245318257 | 0.177819929 | FNBP1L           | 14.95711234 | 13.77686831 |
| SATB1            | 1.926377946 | 1.859555065 | PLCE1            | 7.2419723   | 5.986188066 |
| SATB2            | 3.645017329 | 3.912995441 | JUNB             | 143.4237322 | 144.5139619 |
| HEATR1           | 10.8343928  | 13.80263046 | NHLRC3           | 3.927681262 | 3.615392014 |
| DOT1L            | 9.713700891 | 10.58645382 | NHLRC1           | 0.854681156 | 0.691003585 |
| MALSU1           | 45.30793241 | 54.63579398 | NHLRC2           | 1.530448177 | 1.539197937 |
| PES1             | 67.46601719 | 81.74777963 | FICD             | 4.631183455 | 2.796123526 |
| PERP             | 12.888564   | 12.4302319  | SRCAP            | 9.563723169 | 9.028240684 |
| HEATR2           | 27.71908837 | 30.13171509 | PPP4C            | 53.15890393 | 54.28707631 |
| HEATR3           | 4.077983494 | 4.056711059 | PLCG2            | 0.489148142 | 0.334443466 |
| HEATR6           | 4.210707838 | 4.790791402 | PLCG1            | 22.99328709 | 21.593165   |
| PER2             | 0.566922546 | 0.56791758  | NR2C2AP          | 18.05698488 | 20.31760558 |
| PER1             | 3.45383058  | 2.94370227  | JUND             | 138.6455603 | 121.7189778 |
| LOC10106058<br>1 | 0.153228767 | 0.423053701 | SLC6A6           | 13.52936532 | 14.65363763 |
| PER3             | 5.158676554 | 4.294183427 | FIBP             | 35.85680995 | 34.78944092 |
| CMSS1            | 19.3177488  | 30.98164729 | PPP5C            | 53.26161139 | 67.85668257 |
| ESYT3            | 0.142031777 | 0.115005731 | SLC6A8           | 24.34878678 | 24.58319018 |
| ESYT2            | 23.72531632 | 23.6816027  | SLC6A9           | 43.85247663 | 26.39418328 |
| ESYT1            | 92.71830417 | 79.89105186 | GIPC3            | 0.195718613 | 0.168344848 |
| ACAA2            | 19.30639247 | 20.181485   | GIPC1            | 85.4752229  | 84.84854204 |
| SATL1            | 0.43332625  | 0.406001371 | PLCH1            | 0.131994628 | 0.111422376 |
| ACAA1            | 28.42734238 | 25.45912904 | PLCH2            | 0.1         | 0.1         |
| EOMES            | 2.243345034 | 2.035788453 | HRCT1            | 18.80245971 | 13.18057439 |
| PCOLCE           | 2.280670885 | 2.22947991  | IMPA1            | 6.758198133 | 6.720643504 |
| TANC2            | 3.260955106 | 2.399564545 | IMPA2            | 19.4000515  | 18.68328429 |
| TANC1            | 1.446808996 | 1.212971429 | RIOK2            | 12.09480657 | 12.34304046 |
| ACACA            | 9.493422302 | 9.590095219 | RIOK1            | 13.4405236  | 18.1878502  |
| ZNF385C          | 0.180048193 | 0.14286691  | PLCB3            | 9.577842954 | 9.813905248 |
| ZNF385B          | 1.379821604 | 1.442520004 | RIPPLY3          | 0.123244419 | 0.116596942 |
| HORMAD1          | 0.236857948 | 0.666770716 | PLCB4            | 1.261073238 | 1.243929588 |
| ZNF385D          | 7.700680356 | 9.164027444 | PLCB1            | 0.229752045 | 0.244114979 |
| ZNF385A          | 3.799127117 | 2.843392306 | PLCB2            | 0.1         | 0.153013304 |
| BCKDHA           | 24.55282766 | 23.62363977 | FIGN             | 1.071853324 | 0.80412585  |
| BCKDHB           | 1.947405323 | 2.368420184 | MIPOL1           | 0.447832557 | 0.53167131  |
| PEX2             | 8.902690717 | 8.923082171 | RIOK3            | 6.885210153 | 7.344164299 |
| PEX1             | 2.370001462 | 2.459850735 | CARD8            | 3.775883313 | 3.274143533 |
| TCTE3            | 0.517279333 | 1.490410513 | CARD9            | 0.271294837 | 0.239780183 |
| GPCPD1           | 2.504150368 | 2.250214276 | LOC10192957<br>1 | 3.972514912 | 4.736770772 |
| PEX7             | 3.755706385 | 3.428656616 | TTC9B            | 0.161626663 | 0.1         |
| LPHN1            | 7.039103021 | 7.564813861 | TTC9C            | 11.66035454 | 13.43542303 |
| IRF3             | 30.87991018 | 29.0285399  | POU4F1           | 1.896585947 | 3.656841713 |
| PEX3             | 6.991878128 | 8.778483723 | LRPPRC           | 17.64209156 | 20.24708074 |
| IRF1             | 41.71656881 | 22.52975889 | FAM71E1          | 0.1         | 0.209664941 |
| PEX6             | 5.684242465 | 4.044834139 | POU4F2           | 0.612731482 | 0.513338369 |
| PEX5             | 11.40466478 | 11.13767918 | FIG4             | 7.512050145 | 6.897610484 |
| IRF2             | 14.46180273 | 11.2912308  | PLCD3            | 5.625453736 | 5.181686349 |
| IRF7             | 19.43924913 | 9.133903464 | PLCD4            | 2.199684189 | 1.985374031 |
| FAM96B           | 39.7166463  | 42.57390489 | SLC28A1          | 0.117162629 | 0.1         |

|              |             |             |          |             |             |
|--------------|-------------|-------------|----------|-------------|-------------|
| FAM96A       | 6.882692376 | 8.453589304 | PLCD1    | 3.259430059 | 1.575474723 |
| IRF5         | 0.204987424 | 0.199950599 | SLC28A3  | 0.219904332 | 0.1         |
| IRF6         | 0.16919149  | 0.124701997 | YEATS4   | 9.289937082 | 10.51850588 |
| LPHN2        | 14.89480305 | 14.72155116 | PNISR    | 8.392302789 | 10.60952034 |
| IRF9         | 46.2307525  | 36.33202524 | STIM1    | 10.26126905 | 8.147288116 |
| MARVELD2     | 0.593863719 | 0.543628482 | STIM2    | 4.36792375  | 4.71013287  |
| MARVELD1     | 16.47018922 | 16.04006338 | STIP1    | 99.97576283 | 119.6706419 |
| MARVELD3     | 0.1         | 0.155261328 | KIAA1644 | 7.51391223  | 6.608519969 |
| IRGQ         | 1.526555144 | 1.727440965 | MAR9     | 3.633034917 | 3.417970643 |
| GOLPH3       | 64.51492414 | 59.59482856 | MAR8     | 3.039021607 | 2.045562402 |
| GLB1         | 40.54892701 | 36.0188487  | MAR7     | 13.62897838 | 13.85778696 |
| FAM98C       | 3.563418465 | 4.551299941 | MAR6     | 14.60264069 | 14.52147123 |
| RANGRF       | 21.66468101 | 27.55477308 | MAR5     | 7.510268748 | 8.187775406 |
| FAM98B       | 4.030680026 | 4.79171883  | HOPX     | 1.186846799 | 1.452506956 |
| FAM98A       | 28.659008   | 31.84287663 | MAR3     | 5.176268723 | 4.511341497 |
| TRIO         | 18.66948333 | 14.84426389 | CHERP    | 22.82154751 | 26.78605948 |
| GLDC         | 5.241935264 | 6.965683159 | MAR2     | 17.73137712 | 13.13793742 |
| GLE1         | 20.70456172 | 19.1429944  | MAR1     | 0.203864785 | 0.335967978 |
| MILR1        | 0.306977199 | 0.43779548  | YEATS2   | 11.94546432 | 11.43969683 |
| CREB3L4      | 2.13619594  | 2.0990868   | KIAA1671 | 3.737358183 | 3.431338823 |
| CREB3L1      | 20.45876611 | 11.36512869 | PPP6C    | 16.10338187 | 18.01605589 |
| CREB3L2      | 3.758049948 | 3.716880205 | SORD     | 3.2730076   | 5.053568775 |
| PIP4K2A      | 17.35384179 | 18.71966494 | SOS1     | 6.004402617 | 6.954646516 |
| MYEOV2       | 15.29523516 | 18.96475381 | SOS2     | 6.524240349 | 6.090362239 |
| PIP4K2B      | 11.81894646 | 12.18860824 | PLCL1    | 0.846878225 | 0.728714681 |
| PIP4K2C      | 17.9012608  | 13.97430136 | PLCL2    | 1.684238173 | 1.800952278 |
| PIH1D1       | 17.49395957 | 22.28122936 | CUL4A    | 49.59698712 | 48.07561091 |
| GLCE         | 3.064638131 | 3.310965994 | SVOPL    | 0.1         | 0.1         |
| SARNP        | 38.74827216 | 43.65072397 | MARCKS   | 31.58782266 | 32.90842044 |
| KIAA0368     | 14.40399792 | 13.9469496  | CUL4B    | 26.48825842 | 22.3454082  |
| TYRO3        | 3.095931107 | 3.444173128 | ARL6IP1  | 104.0943407 | 112.8734743 |
| PIH1D2       | 1.484341948 | 0.813877365 | DDX60L   | 11.92282388 | 3.067747959 |
| GLG1         | 11.28391724 | 8.824340386 | SOX2     | 0.1         | 0.1         |
| KIAA0391     | 11.67285669 | 13.68268807 | SOX3     | 4.383350223 | 3.981115747 |
| TRMU         | 8.432307662 | 9.014687594 | CHEK2    | 12.59758953 | 14.99740544 |
| TGFB111      | 28.55225147 | 23.19132407 | CHEK1    | 9.552506713 | 11.18807567 |
| GLI1         | 0.344917279 | 0.274875437 | ARL6IP5  | 43.53107225 | 51.73201138 |
| PFAS         | 15.45866907 | 23.37598654 | ARL6IP4  | 38.09510012 | 37.468625   |
| GLI3         | 4.292299991 | 3.409859833 | SOX9     | 16.89339881 | 14.12696805 |
| GLI4         | 16.69500955 | 14.54545712 | SOX6     | 0.1         | 0.1         |
| ZNF599       | 0.813935733 | 0.740167777 | SOX7     | 0.195090806 | 0.281057553 |
| ZNF598       | 17.54551929 | 19.31281938 | SOX4     | 9.427591439 | 8.022140019 |
| ZNF596       | 1.801911456 | 1.511591367 | ARL6IP6  | 7.692313302 | 7.726224539 |
| ZNF595       | 1.428103694 | 2.070473635 | JMJD4    | 12.19193499 | 11.60705348 |
| ZNF594       | 1.033978109 | 0.960487133 | RECQL    | 21.55963042 | 22.24459881 |
| LOC101928239 | 0.1         | 0.146659329 | JMJD7    | 1.269086402 | 1.117350549 |
| ZNF593       | 92.95590338 | 119.727257  | JMJD8    | 53.45055231 | 56.5405359  |
| ZNF592       | 5.486316527 | 4.67611122  | JMJD6    | 6.710064745 | 7.268483524 |
| SSFA2        | 8.896495881 | 8.644232514 | TTLL11   | 3.992059364 | 4.058343365 |



|        |             |             |          |             |             |
|--------|-------------|-------------|----------|-------------|-------------|
| ZNF589 | 1.860013544 | 2.337775849 | TLL12    | 13.4448595  | 18.19204085 |
| ZNF587 | 3.417632363 | 3.051705309 | FIS1     | 66.95475562 | 67.16063059 |
| ZNF586 | 2.182628284 | 2.992364499 | ZWINT    | 30.52419462 | 34.94967854 |
| ZNF584 | 9.193235726 | 10.29712085 | OCLN     | 0.616205826 | 0.687425081 |
| ZNF583 | 3.229111663 | 2.53475222  | CREBRF   | 1.805454776 | 1.108574622 |
| ZNF582 | 0.769121467 | 0.773771182 | CC2D1A   | 9.947906899 | 9.801551153 |
| ZNF581 | 39.89868726 | 46.34843387 | CC2D1B   | 16.76777793 | 14.70410575 |
| ZNF580 | 33.1787949  | 37.09974466 | ERO1LB   | 0.326143271 | 0.342205675 |
| LAPTM5 | 0.1         | 0.1         | MTERFD1  | 29.0936957  | 37.21837908 |
| SULF1  | 0.454461127 | 0.242769709 | CCHCR1   | 5.632336798 | 5.467242435 |
| SULF2  | 0.16106168  | 0.161038825 | CC2D2A   | 3.249123582 | 3.982024522 |
| SARM1  | 2.58910978  | 2.522165266 | MTERFD3  | 3.314987605 | 4.74329225  |
| RLIM   | 6.845014792 | 6.922758008 | MTERFD2  | 2.677307419 | 2.752660631 |
| ZNF579 | 26.33922892 | 21.45309935 | PACS2    | 10.60822065 | 8.334528075 |
| ZNF577 | 1.106807693 | 1.106430865 | PACS1    | 17.25906856 | 15.01857518 |
| ZNF576 | 12.46544349 | 12.46472206 | DCP2     | 1.490733341 | 1.533134092 |
| ZNF575 | 1.885163274 | 0.748121715 | TOMM40   | 81.60180911 | 115.6024231 |
| ZNF574 | 16.9634177  | 15.31690395 | DCPS     | 13.27223047 | 16.30204959 |
| ZNF572 | 1.495516598 | 1.254946566 | MAGEB17  | 3.835308249 | 4.998716003 |
| ZNF571 | 0.368343373 | 0.483204196 | NUCKS1   | 50.2992073  | 64.25155997 |
| PHLDB1 | 4.044386376 | 2.928400081 | TOMM20   | 45.30236588 | 64.4973124  |
| ZNF570 | 1.394735875 | 1.503206108 | TOMM22   | 51.48576961 | 66.02424743 |
| IRS1   | 6.439292726 | 5.806794796 | TOMM34   | 32.52834712 | 41.93729528 |
| IRS2   | 0.827525742 | 0.820892626 | OCRL     | 24.31204508 | 22.81608604 |
| METRNL | 12.13927065 | 9.920576298 | ALDH3A2  | 9.938536367 | 10.08427858 |
| ZNF569 | 2.582351567 | 2.699055569 | DCTD     | 23.3850155  | 23.74608646 |
| ZNF568 | 1.554332242 | 1.219687587 | ALDH3A1  | 1.25933376  | 0.693506659 |
| ZNF567 | 2.608229642 | 2.639183994 | FIZ1     | 8.421928817 | 7.737819673 |
| ZNF566 | 1.353860163 | 1.404146853 | ALDH3B2  | 0.1         | 0.1         |
| PHLDA2 | 8.570316898 | 8.083309677 | ALDH3B1  | 5.40411639  | 3.666746748 |
| ZNF565 | 1.202287242 | 1.160811025 | RIPK1    | 13.7496737  | 9.698821293 |
| PHLDA1 | 120.291691  | 97.94503802 | ANKZF1   | 4.624285382 | 5.182346341 |
| ZNF564 | 2.690514829 | 1.823846936 | ENKD1    | 4.997877218 | 5.044280927 |
| PHLDA3 | 24.04554243 | 16.4442603  | CREBZF   | 4.85277029  | 4.624753735 |
| ZNF563 | 0.864537816 | 0.779038936 | SPEG     | 4.215866766 | 3.795191    |
| ZNF562 | 4.234934165 | 3.993862748 | DCXR     | 20.09090151 | 26.49994939 |
| ZNF561 | 7.034465605 | 7.053113527 | HPDL     | 3.010193552 | 5.860602623 |
| ZNF559 | 2.592651613 | 2.578201202 | LUC7L3   | 12.33078116 | 16.28980525 |
| ZNF558 | 5.734315356 | 4.649089901 | ITGB3BP  | 12.52874093 | 16.40546543 |
| ZNF557 | 1.735919918 | 1.336060186 | LUC7L2   | 21.75414348 | 23.33217091 |
| ZNF555 | 0.890179713 | 0.872523877 | SPG7     | 9.781541263 | 10.64992424 |
| PHLDB3 | 1.478878546 | 1.258287781 | SPEN     | 5.241166692 | 5.870271045 |
| PHLDB2 | 23.84140289 | 21.78619279 | PDE4DIP  | 2.224464175 | 1.660932759 |
| ZNF554 | 0.619793739 | 0.721914089 | NUPR1L   | 0.1         | 0.1         |
| ZNF552 | 0.791935654 | 1.301754844 | TICRR    | 1.883634547 | 2.435764587 |
| GLYR1  | 19.17436184 | 21.34555169 | KIAA1107 | 0.271042396 | 0.360538481 |
| ZNF551 | 2.272178828 | 3.46044711  | KIAA1109 | 1.998519305 | 1.766086049 |
| ZNF550 | 2.414839912 | 2.191873377 | RAVER1   | 31.33149409 | 33.00261831 |
| GLO1   | 55.65512716 | 81.46434105 | RAVER2   | 3.220411409 | 3.90125912  |
| PHF21A | 4.921612502 | 4.176504867 | MLYCD    | 2.111780657 | 2.009631334 |

|                  |             |             |                   |             |             |
|------------------|-------------|-------------|-------------------|-------------|-------------|
| PHF21B           | 0.170585974 | 0.110079936 | GTSE1             | 21.41878498 | 24.17293372 |
| LOC10192828<br>2 | 0.1         | 0.1         | NLRX1             | 1.95585059  | 1.765342725 |
| ZNF549           | 3.109894992 | 2.380164242 | BAZ2A             | 19.76635535 | 18.9667888  |
| ZNF548           | 2.691854917 | 2.072920487 | BAZ2B             | 1.123255369 | 1.00683224  |
| ZNF547           | 0.923435226 | 1.222445951 | AFMID             | 2.719892478 | 4.07513414  |
| ZNF546           | 0.303597428 | 0.390744608 | CCZ1B             | 17.19072511 | 20.0007373  |
| ZNF544           | 9.596788103 | 10.03895512 | OSBPL11           | 6.339081776 | 6.514299541 |
| SLC15A3          | 35.67533097 | 9.706617705 | OSBPL10           | 2.109982945 | 1.49114129  |
| ZNF543           | 0.892501093 | 0.857848669 | DDA1              | 14.12608042 | 15.16325139 |
| KIAA0319         | 0.634881187 | 0.535705838 | KIAA1147          | 1.780441525 | 2.001482751 |
| SLC15A4          | 6.470504383 | 6.297877891 | KIAA1143          | 6.122750647 | 7.041176398 |
| SHFM1            | 71.97636513 | 82.33285031 | JOSD2             | 53.09134258 | 44.99173864 |
| GLMN             | 3.909419424 | 5.174890845 | BAZ1A             | 11.33480907 | 12.35784614 |
| CYBRD1           | 13.64524917 | 9.56722809  | JOSD1             | 23.33407323 | 20.37722143 |
| LOC10192829<br>1 | 15.51280726 | 12.54970297 | BAZ1B             | 26.80202184 | 27.73712528 |
| RLN2             | 0.1         | 0.1         | DDB2              | 6.674746671 | 6.872378887 |
| SPIRE2           | 3.078710702 | 3.736234539 | DDB1              | 67.6151926  | 71.26527702 |
| SPIRE1           | 9.815279953 | 9.589507403 | INCENP            | 20.73766357 | 24.11368597 |
| ZNF532           | 16.56784754 | 16.66727378 | JMJD7-<br>PLA2G4B | 0.686322698 | 0.584747048 |
| ZNF530           | 2.553838993 | 2.452801363 | ZSWIM1            | 5.338001015 | 6.0760605   |
| C19orf60         | 26.90213608 | 26.44528848 | ODC1              | 31.79027895 | 50.82224027 |
| C19orf66         | 30.57612576 | 15.59083117 | ZSWIM8            | 28.15983967 | 23.196943   |
| C19orf68         | 3.747753331 | 3.492419995 | SPOP              | 8.70810803  | 8.635259595 |
| SART1            | 22.92336023 | 21.07298593 | ZSWIM6            | 5.009079416 | 4.609539737 |
| SART3            | 16.48189009 | 19.01208289 | ZSWIM7            | 6.516293172 | 6.972026801 |
| GM2A             | 14.26341047 | 12.4848273  | ZSWIM4            | 4.844810075 | 4.240744131 |
| ZNF529           | 1.958597435 | 1.959321128 | ZSWIM5            | 0.108898814 | 0.11906175  |
| ZNF528           | 1.301957565 | 0.845524256 | ZSWIM3            | 1.917333604 | 1.934121234 |
| ZNF527           | 0.93590921  | 0.943828822 | KIAA1161          | 1.249400605 | 0.973077817 |
| ZNF526           | 7.116181564 | 6.526278156 | ABCB10            | 6.000033195 | 7.806442078 |
| ZNF524           | 15.74628179 | 12.7769062  | SLCO3A1           | 8.29051664  | 6.27509621  |
| ZNF521           | 0.1         | 0.1         | OLFML2B           | 16.97642999 | 17.37178284 |
| C19orf73         | 0.658615881 | 0.997439504 | CASC4             | 12.46687469 | 11.83642704 |
| C19orf70         | 51.70493513 | 61.34658993 | MPV17L2           | 11.86543626 | 14.47398939 |
| C19orf71         | 3.975792329 | 2.923293733 | CASC5             | 3.135279553 | 3.9131934   |
| LCA5L            | 0.220350449 | 0.185932431 | CASC3             | 16.12038182 | 16.20667742 |
| SARS2            | 7.873823044 | 9.746279533 | OLFML2A           | 16.09537867 | 12.38733638 |
| ZNF519           | 0.275459526 | 0.306986537 | ZCRB1             | 15.36984388 | 17.078024   |
| ZNF517           | 4.811669442 | 3.844521507 | CASD1             | 2.321512617 | 2.297748125 |
| ZNF516           | 0.112045276 | 0.112900823 | SMYD5             | 9.566213959 | 10.14556155 |
| ZNF514           | 1.568423479 | 1.424397483 | SPATA1            | 0.561465293 | 0.360127393 |
| ZNF513           | 7.298068497 | 5.377066272 | SPATA2            | 4.854777584 | 5.008863333 |
| ZNF512           | 7.956525819 | 7.28242429  | SPATA5            | 0.725380806 | 0.760687151 |
| SMPDL3B          | 0.155473868 | 0.1         | SPATA6            | 0.473451672 | 0.440721175 |
| ZNF511           | 19.67793493 | 26.89023113 | SPATA7            | 3.598914701 | 4.245712081 |
| ZNF510           | 2.549390824 | 2.554231794 | SMYD2             | 17.82818057 | 18.83420499 |
| SMPDL3A          | 2.612284468 | 2.33815732  | SMYD4             | 5.002647043 | 4.576291857 |

|               |             |             |           |             |             |
|---------------|-------------|-------------|-----------|-------------|-------------|
| GLS2          | 0.290927148 | 0.24995804  | SMYD3     | 9.346374067 | 10.26402841 |
| C19orf83      | 0.267584764 | 0.379203401 | ODF2      | 23.16601956 | 23.33811748 |
| C19orf82      | 1.941239369 | 1.738291963 | HPS1      | 18.11199972 | 14.27080506 |
| GLRX          | 9.909864687 | 9.784572832 | RABL2A    | 0.642969032 | 0.890887322 |
| ZNF507        | 2.072236869 | 2.570381111 | HPS4      | 5.823373912 | 5.421653675 |
| KIAA0355      | 3.310515845 | 2.914116752 | HPS3      | 11.51504131 | 11.42576316 |
| ZNF506        | 2.131788811 | 1.595372523 | RABL2B    | 4.646001038 | 4.387644767 |
| ZNF503        | 28.9981019  | 24.73229828 | HPS6      | 13.24336199 | 12.71923542 |
| ZNF502        | 1.182558199 | 1.070319576 | HPS5      | 4.156032075 | 3.535771129 |
| ZNF501        | 1.067749985 | 1.109066614 | HPSE      | 6.242132918 | 5.657745878 |
| ZNF500        | 2.224698597 | 2.18740234  | OSBPL1A   | 5.846275879 | 5.279418541 |
| IRX1          | 0.12796086  | 0.159893702 | SPRN      | 1.090744202 | 1.006679861 |
| IRX2          | 0.116994202 | 0.112134173 | ITGB1     | 218.8712848 | 201.1464375 |
| IRX5          | 7.097313469 | 7.378651793 | GPR89A    | 4.155583404 | 6.744261566 |
| IRX6          | 0.1         | 0.1         | ITGB5     | 29.04396285 | 24.19761162 |
| IRX3          | 2.527800365 | 2.081136071 | NUMA1     | 22.15035294 | 20.42289428 |
| IRX4          | 0.1         | 0.14630982  | ITGB4     | 0.796351719 | 0.640176506 |
| PFKL          | 19.41268588 | 15.67976678 | ITGB3     | 4.229351603 | 4.412746333 |
| GLRB          | 0.252897807 | 0.488166553 | ITGB2     | 0.134878333 | 0.124903771 |
| PFKM          | 17.88366174 | 23.45480684 | ITGAE     | 4.17698444  | 5.393676654 |
| PFKP          | 88.7377678  | 89.19363194 | ELFN2     | 8.444763184 | 5.636840017 |
| GLTP          | 8.302833207 | 8.759503988 | GPR89B    | 4.101917839 | 2.88732156  |
| SYNJ2BP-COX16 | 2.252457    | 2.699437732 | ELFN1     | 10.87071343 | 6.556565799 |
| C19orf26      | 7.314220669 | 6.763622666 | ZNRD1     | 4.596921469 | 6.458396366 |
| C19orf25      | 10.48104826 | 11.37452282 | DDI2      | 4.132039407 | 4.349219782 |
| C19orf24      | 117.9336226 | 120.2933876 | ITGB8     | 0.609036097 | 0.446555956 |
| ZNF609        | 6.025749045 | 6.41005426  | ITGAV     | 12.11988052 | 10.58519133 |
| EDNRA         | 1.201617439 | 1.270924282 | ITGA4     | 4.114649816 | 4.973107329 |
| ZNF608        | 0.50867902  | 0.327607376 | TMEM255B  | 14.04033403 | 12.1019951  |
| EDNRB         | 0.739078558 | 0.622686752 | ITGA3     | 139.6150665 | 104.1068176 |
| RUSC2         | 11.41940527 | 9.452521315 | ITGA2     | 0.178813568 | 0.160963863 |
| ZNF607        | 2.671373929 | 2.012508568 | AHSA2     | 1.112801222 | 1.08788641  |
| RUSC1         | 29.24745451 | 27.08504703 | AHSA1     | 82.88807067 | 99.48586951 |
| ZNF606        | 1.943987588 | 1.679969217 | SPTB      | 0.294439922 | 0.246140712 |
| ZNF605        | 1.820240959 | 2.203061271 | ADORA2A   | 27.04261481 | 23.75091544 |
| ZNF600        | 3.453593191 | 2.998638127 | RRM2B     | 7.441857269 | 6.808839462 |
| GLUL          | 0.265099397 | 0.23360187  | ADORA2B   | 37.69232986 | 39.79174174 |
| C19orf38      | 0.668550227 | 0.4805831   | ITGA7     | 0.261554393 | 0.256550235 |
| C19orf33      | 0.212692575 | 0.1         | ITGA6     | 25.26194379 | 22.20965533 |
| PFN4          | 0.334366663 | 0.378903505 | ITGA5     | 92.49993004 | 68.68493125 |
| PFN1          | 1906.502538 | 2053.350417 | ITGA9     | 0.165561935 | 0.268524733 |
| PFN2          | 103.4351848 | 108.0183078 | LOC728728 | 0.184818411 | 0.1         |
| C19orf40      | 8.148789391 | 8.239268486 | LRRC16A   | 7.400858878 | 6.095552695 |
| TMEM161B      | 7.637363362 | 8.778178158 | LRRC16B   | 0.325875117 | 0.237087136 |
| C19orf43      | 179.8742541 | 207.2566511 | ZNRF1     | 3.093954447 | 3.454728173 |
| TMEM161A      | 24.07095046 | 24.22034451 | ZNRF2     | 5.700527836 | 4.817177201 |
| C19orf48      | 51.83312524 | 72.17438767 | ZNRF3     | 1.321559156 | 1.622210803 |
| C19orf45      | 0.484386227 | 0.564468785 | CCDC85C   | 3.498681671 | 4.76375251  |
| C19orf44      | 3.160391534 | 2.780338763 | CCDC85B   | 125.1710126 | 117.7655856 |

|          |             |             |             |             |             |
|----------|-------------|-------------|-------------|-------------|-------------|
| C19orf47 | 15.18807998 | 13.75175632 | FEM1C       | 7.666584206 | 6.875596495 |
| C19orf52 | 12.78102036 | 14.30571146 | FEM1A       | 12.38504443 | 12.61590362 |
| C19orf54 | 4.625011492 | 4.342151983 | FEM1B       | 3.645116626 | 3.777124588 |
| C19orf53 | 134.2598911 | 159.4826261 | LOC728715   | 0.143693252 | 0.287186709 |
| SS18L1   | 4.293178685 | 5.032231951 | SPA17       | 5.350395013 | 5.506277411 |
| SS18L2   | 14.25114538 | 19.1704977  | TBC1D22A    | 6.956638017 | 5.572766445 |
| C19orf55 | 3.731263535 | 3.816330721 | TBC1D22B    | 5.64934095  | 5.558743772 |
| C19orf57 | 1.673713403 | 1.517952259 | NUMBL       | 30.40126433 | 28.46490157 |
| KRT23    | 0.1         | 0.1         | WDYHV1      | 11.8730138  | 13.16329393 |
| C9orf9   | 3.594272973 | 2.859343319 | DDR1        | 3.845821568 | 2.056575908 |
| C9orf3   | 8.465265547 | 7.696668737 | NBPF20      | 0.294003168 | 0.22862741  |
| ARNTL    | 7.123885433 | 7.388906208 | NAT10       | 9.459913451 | 12.26798347 |
| CA12     | 11.82334477 | 8.610661522 | NAT14       | 50.31956774 | 47.41566974 |
| CA11     | 1.734310906 | 1.744307652 | NBPF26      | 0.923470125 | 1.010781392 |
| C19orf10 | 182.0530452 | 168.9825739 | NEDD8-MDP1  | 18.26948806 | 21.72224712 |
| KRT10    | 9.862007394 | 11.29726225 | NBPF12      | 0.933091233 | 0.940084506 |
| C19orf12 | 7.756432993 | 6.848605586 | NBPF11      | 1.126741313 | 0.983661979 |
| KRT19    | 0.382535837 | 0.251301833 | NBPF14      | 0.574892648 | 0.389632606 |
| KRT18    | 1.304051409 | 1.49071516  | NBPF15      | 8.646753188 | 7.430771283 |
| KRT17    | 0.243975825 | 0.168534256 | NBPF19      | 0.568698086 | 0.674498025 |
| KRT16    | 0.1         | 0.1         | RP11-35G9.3 | 1.227096322 | 1.447517641 |
| KRT15    | 0.259686302 | 0.277362816 | MFGE8       | 7.527473248 | 4.597594398 |
| KRT14    | 0.385795533 | 0.25871587  | FJX1        | 55.74412919 | 42.28822919 |
| TRIP10   | 38.84134381 | 36.2592997  | DDR2        | 23.84198455 | 20.44902728 |
| TRIP11   | 4.422849827 | 4.28731129  | GNAI3       | 35.40233306 | 35.59089734 |
| TRIP12   | 18.37809675 | 16.03505252 | GNAI1       | 6.159416573 | 5.958150415 |
| TRIP13   | 44.42480344 | 57.64172411 | GNAI2       | 159.8035589 | 139.7149396 |
| CMTR1    | 21.49022025 | 15.03121141 | PNMA1       | 42.20353208 | 43.32740515 |
| KRT6C    | 0.122696058 | 0.1         | EPS15       | 7.056693986 | 7.049826536 |
| CA14     | 0.121646365 | 0.192735415 | DDTL        | 0.854968603 | 0.773826815 |
| KRT6B    | 0.395953813 | 0.327571572 | PNMA2       | 3.64846733  | 3.766550887 |
| CMTR2    | 4.070933495 | 4.019412204 | MSMO1       | 11.23399758 | 12.88618681 |
| KRT6A    | 0.142409206 | 0.160561904 | YARS2       | 7.081027555 | 7.593943373 |
| CA13     | 1.434157308 | 1.447129251 | WDFY1       | 8.2078724   | 6.549408966 |
| TSC2     | 8.064313108 | 7.656691802 | WDFY3       | 1.795954075 | 1.409266747 |
| TSC1     | 2.81154471  | 2.567233224 | WDFY2       | 6.373979367 | 6.225552776 |
| KRT75    | 0.1         | 0.117456078 | CARS2       | 23.47184547 | 29.4728865  |
| ISCU     | 13.51225778 | 14.08910711 | DDX6        | 14.38305543 | 14.95077184 |
| COBLL1   | 6.488917863 | 4.630851006 | DDX5        | 77.60454736 | 82.84562475 |
| BTNL9    | 0.362896538 | 0.506711409 | DDX1        | 37.09704219 | 42.41793419 |
| ACBD7    | 0.331237138 | 0.33115059  | VCPIP1      | 6.536722551 | 5.571570989 |
| ACBD6    | 26.91148824 | 30.8358221  | IRAK1       | 180.598318  | 208.3820291 |
| ACBD5    | 9.02406938  | 8.02716728  | IRAK2       | 21.24592191 | 17.89322356 |
| ACBD4    | 1.681236707 | 1.502184976 | GNAO1       | 1.588862873 | 1.395996468 |
| MRGBP    | 42.23896366 | 45.08461228 | DYRK4       | 2.524764537 | 2.368634627 |
| ACBD3    | 29.24517642 | 23.26174303 | DYRK3       | 15.02629973 | 14.21792892 |
| SCYL3    | 3.81560913  | 3.173173638 | DYRK2       | 8.265097599 | 7.923562569 |
| CA5B     | 0.849297264 | 0.862545856 | HP1BP3      | 30.57760609 | 34.06471795 |
| KYNU     | 37.30515228 | 35.33734784 | DPY30       | 21.01038898 | 26.48322569 |

|              |             |             |              |             |             |
|--------------|-------------|-------------|--------------|-------------|-------------|
| SCYL2        | 11.73294988 | 11.19462976 | WHSC1        | 16.13307158 | 17.46460908 |
| SCYL1        | 41.28854073 | 40.72161141 | IRAK3        | 0.106226184 | 0.108891219 |
| TSFM         | 17.35118522 | 20.48237961 | IRAK4        | 5.006708952 | 3.85128748  |
| JAGN1        | 25.07416809 | 27.76420345 | QRSL1        | 5.209341228 | 6.684709926 |
| HSH2D        | 0.31957429  | 0.288136092 | GNB1L        | 9.265860586 | 9.770368535 |
| PRTFDC1      | 2.616835173 | 2.609111789 | NAT8L        | 4.373968111 | 5.445199214 |
| KRT81        | 1.187984858 | 1.012788382 | CARKD        | 14.17369387 | 15.47125908 |
| KRT80        | 32.36539592 | 26.38727447 | LOC101927420 | 0.4755514   | 0.234075299 |
| TUFT1        | 12.46256774 | 9.673052636 | TRA2B        | 37.1319359  | 44.78593259 |
| KRT86        | 0.566428737 | 0.179294926 | TRA2A        | 9.471024829 | 12.65517988 |
| U2AF1L4      | 11.57987019 | 9.581935736 | TMED7-TICAM2 | 11.64472822 | 9.212462658 |
| GMDS         | 12.22009856 | 12.51135625 | SIMC1        | 1.443298202 | 1.850987399 |
| SASH1        | 3.867124637 | 2.828290598 | CARM1        | 38.81240452 | 41.99824311 |
| CMTM7        | 5.137466531 | 8.144848771 | HNRNPU       | 83.91563748 | 87.59043255 |
| CMTM8        | 5.117516494 | 5.42634181  | HNRNPR       | 75.21370146 | 86.9867794  |
| CMTM3        | 10.12490336 | 9.23038224  | LOC101927562 | 1.474026217 | 0.824130448 |
| CMTM4        | 0.682427769 | 1.055116512 | ASTN2        | 0.427946677 | 0.729809526 |
| CMTM6        | 12.04601556 | 12.87247136 | ASTN1        | 0.1         | 0.1         |
| GDAP1        | 3.857440397 | 3.410789902 | KIAA1009     | 1.940559527 | 2.09248664  |
| GDAP2        | 1.744509275 | 1.717150198 | PLEK2        | 0.384664531 | 0.633546226 |
| CMTM1        | 1.518631857 | 0.903357648 | NHEJ1        | 5.238309848 | 5.885490492 |
| GMFB         | 15.40174106 | 18.94021227 | PRELID2      | 3.393918889 | 3.818971287 |
| GMFG         | 0.337220443 | 0.325839672 | PRELID1      | 162.0345381 | 208.0662718 |
| ISM1         | 0.941803099 | 0.90141717  | PAFAH2       | 4.407946613 | 4.820521968 |
| ISM2         | 0.1         | 0.1         | HNRNPL       | 106.3851893 | 118.6259456 |
| TSKU         | 6.67796135  | 6.988618367 | HNRNPM       | 81.81636749 | 100.5071337 |
| ISLR         | 1.050742324 | 0.859662662 | SQLE         | 85.77007167 | 78.24719451 |
| HIST3H2BB    | 0.44480936  | 0.428266957 | HNRNPK       | 245.0106707 | 267.9801671 |
| ISL2         | 2.671559316 | 2.596325977 | HNRNPF       | 125.480777  | 142.8081914 |
| CTAGE5       | 6.370708939 | 6.203722066 | HNRNPD       | 67.12796569 | 82.48947941 |
| TMEM126A     | 14.45328679 | 15.33672351 | HNRNPC       | 153.8131572 | 194.4679556 |
| TMEM126B     | 22.7267132  | 28.05857814 | KIAA1033     | 9.945280692 | 8.252423796 |
| PLA2G6       | 3.163388369 | 2.636835073 | ABCC10       | 4.662465777 | 4.306032503 |
| PLA2G7       | 0.128249743 | 0.120170835 | ZNF280D      | 2.188073833 | 1.978563078 |
| LOC101928793 | 0.247087421 | 0.163013872 | C1QTNF2      | 0.595594928 | 0.484634655 |
| RHOT2        | 24.77278515 | 26.07463752 | C1QTNF1      | 2.714648198 | 2.592744939 |
| RHOT1        | 4.063293295 | 3.279499958 | ZNF280A      | 0.1         | 0.1         |
| ZNF497       | 2.783614532 | 2.443118301 | ZNF280B      | 0.21737341  | 0.274060217 |
| ZNF496       | 14.33606033 | 14.7026808  | C1QTNF6      | 0.130425345 | 0.208621277 |
| ANXA8L1      | 0.1         | 0.117663889 | ZNF280C      | 2.456894994 | 2.446531918 |
| ZNF493       | 0.43037378  | 0.421076513 | ELMOD2       | 2.759696094 | 2.816295425 |
| ZNF492       | 0.454908606 | 0.458271099 | ELMOD3       | 2.817509077 | 2.468566888 |
| ZNF491       | 0.790020456 | 1.020547291 | KIAA1024     | 0.346579778 | 0.287066397 |
| ZNF490       | 0.747474098 | 0.75696457  | COQ10B       | 9.537150178 | 8.832969081 |
| MED19        | 18.20579158 | 21.37711578 | COQ10A       | 4.68578382  | 6.469252233 |
| MED16        | 20.10578478 | 17.53733126 | SIKE1        | 5.736311626 | 6.747317292 |

|        |             |             |          |             |             |
|--------|-------------|-------------|----------|-------------|-------------|
| MED15  | 19.33218291 | 17.43382421 | ZEB2     | 4.337938206 | 4.00887351  |
| MED18  | 7.716185068 | 7.086167198 | ZEB1     | 28.66647802 | 23.73362133 |
| MED17  | 9.592955673 | 11.40751534 | GRAMD1C  | 0.279571019 | 0.238079853 |
| MED12  | 6.986633878 | 6.069726084 | GRAMD1A  | 22.61906472 | 23.36327154 |
| MECP2  | 6.456253603 | 6.285849103 | ADRBK2   | 0.186050039 | 0.161441309 |
| MED11  | 26.8213506  | 23.70537847 | ADRBK1   | 16.49693324 | 15.48050793 |
| MED14  | 13.99954695 | 13.62749725 | DEDD     | 19.12789782 | 17.45695895 |
| MED13  | 3.038858669 | 2.645017803 | GLYCTK   | 4.488515766 | 5.010096207 |
| MED10  | 18.39412672 | 22.72455466 | DEF8     | 9.01893815  | 9.35816982  |
| TSPO   | 143.3039847 | 139.6168127 | DEF6     | 0.190507451 | 0.1         |
| ZNF488 | 0.139376915 | 0.128115841 | CCDC71L  | 12.0192012  | 8.233214555 |
| ZNF486 | 0.459939563 | 0.690156095 | VKORC1L1 | 7.977279786 | 9.360958719 |
| ZNF485 | 1.262899631 | 1.706511333 | TM7SF3   | 14.67169964 | 15.4549022  |
| ZNF484 | 0.808836575 | 0.688942356 | TM7SF2   | 12.91746059 | 7.861739955 |
| RMI2   | 8.04506261  | 9.865712743 | DEPTOR   | 0.513875879 | 0.74731853  |
| CNOT6L | 1.113826387 | 1.242324576 | FCGRT    | 1.17031157  | 0.648672294 |
| RMI1   | 5.464534036 | 5.903921309 | THNSL1   | 1.723903851 | 2.165658847 |
| ZNF480 | 4.36171378  | 4.856063483 | THNSL2   | 1.107830777 | 0.751075434 |
| MED27  | 21.38206258 | 23.64378584 | SLCO2A1  | 27.52112157 | 22.05082199 |
| GMIP   | 4.721477619 | 3.619807917 | SREK1    | 9.066932738 | 9.749297156 |
| MED26  | 6.414429708 | 6.915354024 | REEP1    | 0.241276649 | 0.310918621 |
| MED29  | 19.87847887 | 20.59694464 | IRAK1BP1 | 0.687615952 | 0.616392105 |
| PGM2L1 | 1.817246069 | 1.55741107  | REEP5    | 24.90856872 | 26.45638123 |
| MED28  | 16.72765305 | 21.06500883 | REEP4    | 67.56919088 | 67.30306729 |
| MED23  | 5.609684173 | 5.248828473 | REEP3    | 6.577690443 | 6.620876474 |
| MED22  | 17.39937663 | 19.11194604 | REEP2    | 13.1451353  | 12.73755352 |
| MED25  | 36.79627119 | 32.3812654  | REEP6    | 1.348646861 | 1.126641161 |
| MED24  | 15.41511633 | 16.17153968 | CXorf38  | 3.583791515 | 4.07125779  |
| MED21  | 7.589422671 | 8.046059962 | PSTPIP2  | 3.570290327 | 4.037575179 |
| MED20  | 12.65803669 | 12.76411    | CDADC1   | 2.012136469 | 1.780369929 |
| ISPD   | 0.457376634 | 0.34845839  | FAAH2    | 0.125820714 | 0.118436464 |
| ZNF473 | 6.776602731 | 7.626352557 | CXorf23  | 1.003987419 | 0.928249784 |
| ZNF471 | 1.535440906 | 0.975958623 | CCDC74B  | 0.902173314 | 0.823494505 |
| ZNF470 | 1.642314903 | 1.253186513 | CCDC74A  | 5.86256383  | 7.174552349 |
| TSR3   | 46.52821763 | 47.33036275 | FRRS1    | 1.826536091 | 1.623658805 |
| EGFR   | 16.66874655 | 11.1885061  | NLRC5    | 6.235155826 | 1.750049005 |
| ZNF469 | 0.957788259 | 0.639428911 | DENND3   | 12.95988378 | 10.8181976  |
| ZNF468 | 3.566650773 | 3.059917133 | CXorf57  | 0.1         | 0.1         |
| ZNF467 | 4.995931862 | 3.945363823 | TGFBR3L  | 0.291560756 | 0.674467175 |
| ZNF462 | 0.621960905 | 0.687068692 | CXorf56  | 5.579910445 | 8.557100178 |
| ZNF461 | 1.255557853 | 0.948331495 | ASTE1    | 4.457324527 | 4.386258942 |
| ZNF460 | 0.386298656 | 0.278869688 | FKTN     | 2.559603108 | 2.960668663 |
| NUDT22 | 38.47842083 | 34.7880581  | MLXIP    | 2.878042094 | 3.26427136  |
| NUDT21 | 16.14395007 | 19.63609251 | FKRP     | 4.526650221 | 4.507324851 |
| TAOK3  | 5.254837017 | 4.330630266 | NCKAP5L  | 7.214144255 | 5.929083256 |
| TAOK1  | 3.540197134 | 3.508204987 | DOLPP1   | 11.60758984 | 14.89675379 |
| TAOK2  | 15.89528724 | 15.01260418 | IFI27L1  | 11.242753   | 10.1743209  |
| TSR2   | 34.28982153 | 35.23447438 | IFI27L2  | 9.667044582 | 5.501291863 |
| TSR1   | 34.84042448 | 43.80891319 | FLAD1    | 32.44483256 | 37.62491576 |
| ZNF451 | 3.970217721 | 3.399763944 | DENR     | 15.08627167 | 18.36230265 |

|          |             |             |                  |             |             |
|----------|-------------|-------------|------------------|-------------|-------------|
| NAB1     | 2.936453699 | 2.880609906 | TBC1D10A         | 7.025120667 | 5.669639421 |
| GMNN     | 21.07115768 | 27.23999773 | TBC1D10B         | 23.86360115 | 20.41830696 |
| NAB2     | 29.07467015 | 27.10991665 | HSD11B1L         | 4.161014978 | 2.858193481 |
| NUDT11   | 0.77215759  | 0.966975503 | AZGP1            | 0.387477422 | 0.510528321 |
| NUDT19   | 6.596098334 | 8.576523312 | BLZF1            | 18.32104753 | 13.47822387 |
| ZNF449   | 2.890189303 | 2.887317241 | CASZ1            | 1.678629963 | 1.171278029 |
| NUDT18   | 11.24951698 | 8.67146302  | DCUN1D5          | 3.547913057 | 4.5226315   |
| NUDT17   | 3.807410434 | 2.815035036 | MAGED1           | 164.9275577 | 124.0571879 |
| NUDT16   | 8.599443283 | 8.046187435 | DCUN1D3          | 3.396768623 | 2.699695747 |
| ZNF446   | 8.618137306 | 6.098561107 | DCUN1D4          | 7.987710409 | 8.584738759 |
| MTPAP    | 4.22282376  | 4.990885611 | DCUN1D1          | 6.472781178 | 6.367831458 |
| ZNF445   | 1.564915508 | 1.569434234 | DCUN1D2          | 3.689418709 | 3.388690978 |
| NUDT15   | 10.06888994 | 13.32695045 | ZRANB3           | 0.870147025 | 1.034294629 |
| ZNF444   | 22.05751259 | 23.59944559 | ZRANB1           | 3.329403704 | 4.281202515 |
| NUDT14   | 11.74425174 | 8.556332902 | ZRANB2           | 22.84623478 | 30.45942249 |
| NUDT13   | 0.32867709  | 0.396872078 | NARG2            | 3.163571981 | 3.155236555 |
| ZNF443   | 0.49580172  | 0.612640851 | MAGEE1           | 1.321226992 | 0.751478195 |
| NUDT12   | 4.061880641 | 3.939161121 | NARFL            | 12.38028764 | 11.38112491 |
| ZNF442   | 0.74364414  | 0.428266957 | DERA             | 9.441586927 | 9.352025206 |
| ZNF441   | 1.431485066 | 1.217495114 | CCDC64B          | 0.1         | 0.118399884 |
| ZNF440   | 2.199920069 | 2.55756614  | MAGED2           | 104.0498469 | 72.56616351 |
| IST1     | 20.41027294 | 18.53992613 | DET1             | 2.273770028 | 2.043400408 |
| ZNF439   | 2.279916328 | 2.572944412 | MAGEF1           | 18.10689327 | 20.30110358 |
| NAAA     | 1.048117776 | 1.09554928  | SRA1             | 31.75174864 | 31.61803965 |
| ZNF438   | 3.40957872  | 3.319452763 | SLC22A15         | 0.1         | 0.1         |
| ZNF436   | 5.280096168 | 4.682074833 | SLC22A17         | 0.161626663 | 0.173337616 |
| PLA2R1   | 0.634914622 | 0.422672491 | CHMP1B           | 7.332432677 | 8.440126251 |
| ZNF433   | 1.294936272 | 1.251151561 | SLC22A18         | 1.67248297  | 1.646472947 |
| ZNF432   | 1.715274838 | 1.628170079 | CHMP1A           | 34.96810909 | 32.55560583 |
| ZNF431   | 0.923980212 | 0.987327948 | HRAS             | 13.9087673  | 14.30339831 |
| ZNF430   | 1.133988161 | 1.216895026 | ZER1             | 12.65287832 | 10.19306382 |
| GMPS     | 44.73538693 | 52.65384308 | BHMT2            | 0.746696394 | 0.687685771 |
| GMPR     | 6.203846404 | 3.356451552 | PPRC1            | 21.04871924 | 21.44260547 |
| MED30    | 19.19275357 | 20.58652426 | ITFG3            | 28.92948237 | 24.64472371 |
| ZNF429   | 1.57426326  | 1.309763149 | ITFG2            | 5.59588686  | 6.511528098 |
| ZNF428   | 18.21204569 | 18.4860042  | ITFG1            | 17.84343077 | 15.47564811 |
| MED31    | 10.70358189 | 13.92071288 | SLC22A23         | 9.639725639 | 8.535288421 |
| PGK1     | 228.9171803 | 249.1958225 | LOC10050774<br>7 | 0.686058801 | 0.666941404 |
| ZNF426   | 2.500636626 | 1.894447028 | SLC22A20         | 0.121855817 | 0.1         |
| BRIX1    | 34.50292733 | 56.19290643 | MAGEH1           | 1.398781924 | 1.177735909 |
| ZNF425   | 1.26164346  | 1.125273537 | DCST2            | 9.740233036 | 8.584071746 |
| NAE1     | 20.10844576 | 24.30535072 | SLC22A31         | 0.14889532  | 0.222192547 |
| NADK     | 29.75255535 | 30.65810036 | UBL4A            | 63.04348671 | 68.2149802  |
| ZNF420   | 2.346379806 | 2.324152944 | GUCY1B3          | 1.730972684 | 1.447218101 |
| TMEM120B | 1.587286891 | 1.710212806 | KDM1A            | 42.30748472 | 53.10440817 |
| TMEM120A | 21.36082171 | 22.79527502 | KDM1B            | 5.130473377 | 5.281021243 |
| ARPC4    | 132.785301  | 123.5213809 | MRFAP1           | 107.1662535 | 110.1765984 |
| ARPC5    | 110.3034519 | 113.7831277 | NARS2            | 3.214189291 | 5.136206761 |
| ARPC2    | 145.5290564 | 147.1457112 | GUCY1A3          | 0.187194003 | 0.22451624  |

|              |             |             |              |             |             |
|--------------|-------------|-------------|--------------|-------------|-------------|
| ZNF419       | 2.339657756 | 1.965682914 | GUCY1A2      | 1.727181004 | 1.547722251 |
| NACA         | 61.9821364  | 81.42294893 | GAS2L3       | 7.976749394 | 9.551919238 |
| ARPC3        | 155.5722371 | 159.7645012 | KDM2A        | 15.60003653 | 12.44014988 |
| ZNF418       | 1.225095332 | 1.104173421 | KDM2B        | 3.461719391 | 3.797986477 |
| ZNF417       | 1.547080009 | 1.440848022 | DEXI         | 7.575999885 | 7.934011111 |
| ZNF416       | 4.394075739 | 3.392232906 | CHMP4C       | 0.240636917 | 0.240584279 |
| ZNF415       | 6.371666006 | 6.531143515 | CHMP4B       | 75.20381936 | 70.50459227 |
| ZNF414       | 9.092080298 | 9.549772174 | CHMP4A       | 24.08340663 | 26.25193426 |
| ZNF410       | 17.80013183 | 15.92755003 | HRH1         | 26.31499277 | 23.08243205 |
| ISY1         | 5.38432604  | 5.928531834 | LOC101927509 | 0.503070252 | 0.419777295 |
| MIPPEP       | 15.28542884 | 17.41773752 | CLSPN        | 6.664329198 | 7.856370909 |
| CIITA        | 0.910738614 | 1.173978939 | NLRP1        | 0.1         | 0.106608617 |
| ZNF408       | 7.714804715 | 6.859249343 | GAS2L1       | 43.26704772 | 39.95912952 |
| ZNF407       | 1.76027864  | 1.910368075 | AMACR        | 4.284619565 | 4.139191722 |
| PGM3         | 14.34644981 | 12.44095517 | CHMP2B       | 19.27531913 | 19.47986688 |
| ZNF404       | 0.763694728 | 0.737300652 | CHMP2A       | 91.58590075 | 83.57960533 |
| PGM2         | 5.15393831  | 6.320547323 | BMPR1B       | 0.819469124 | 0.800519325 |
| PGLS         | 56.42241924 | 53.58878314 | BMPR1A       | 7.930045894 | 8.450290726 |
| YAF2         | 1.863998217 | 2.080296997 | KDM5A        | 3.479997256 | 3.386304866 |
| PGM1         | 38.48464171 | 37.60020083 | MUS81        | 23.13173279 | 21.19730701 |
| TFIP11       | 21.45202808 | 18.89420855 | KDM5B        | 15.24669066 | 12.95481679 |
| NAF1         | 5.684694169 | 6.713537755 | KDM5C        | 20.11736758 | 19.8958083  |
| BECN1        | 14.83932637 | 14.53608707 | HS2ST1       | 7.579815404 | 7.779008357 |
| ROCK1        | 8.068466544 | 8.177045507 | CASP9        | 1.688965304 | 1.572501607 |
| ROCK2        | 5.222138834 | 4.887236664 | FLCN         | 18.35605163 | 15.89351408 |
| FOXRED1      | 13.04540311 | 15.53369292 | CASP7        | 10.03582614 | 5.805737199 |
| FOXRED2      | 22.48778583 | 21.81600587 | CASP8        | 6.649224014 | 5.711519517 |
| POLR2J3      | 1.862632612 | 1.203993041 | CASP6        | 3.268625906 | 3.71317777  |
| POLR2J2      | 1.799463011 | 1.724153225 | CASP3        | 18.8941956  | 20.26379478 |
| NAGA         | 20.24750275 | 16.5564296  | CASP4        | 28.65014704 | 23.33872689 |
| NAGK         | 32.00344938 | 22.28235257 | CASP1        | 1.392963588 | 0.506207892 |
| NAGS         | 0.852190304 | 0.690785465 | CASP2        | 7.502288459 | 7.562731656 |
| LDLRAD3      | 17.1604564  | 14.18054068 | KDM6A        | 5.931960788 | 5.04832043  |
| LDLRAD4      | 0.1         | 0.1         | PROSER2      | 0.785825439 | 0.867926032 |
| CCDC102A     | 3.757335678 | 3.077917828 | SRGN         | 3.704275197 | 3.768003673 |
| CCDC102B     | 0.778064432 | 1.088903069 | KDM6B        | 3.721289249 | 3.498148418 |
| SNRPD2       | 190.9072247 | 240.5710519 | PROSER1      | 14.95470833 | 14.46690282 |
| SNRPD1       | 24.28981334 | 31.00407719 | SPATS2       | 8.749422299 | 9.647154993 |
| LOC100506504 | 0.204459672 | 0.224310208 | POMGNT2      | 12.13253363 | 13.14681353 |
| SNRPD3       | 29.19980929 | 38.46051113 | POMGNT1      | 43.11551578 | 44.20617647 |
| FAM76B       | 1.805438588 | 1.972697273 | CASQ2        | 1.138256461 | 1.294371746 |
| FAM76A       | 3.986591778 | 3.057247217 | KDM7A        | 0.524531028 | 0.455664265 |
| TBC1D9B      | 49.45622771 | 46.17863895 | KDM3A        | 7.791763708 | 7.071275811 |
| GGNBP2       | 17.58132186 | 17.35067651 | KDM3B        | 16.29617089 | 15.54092988 |
| GSPT2        | 0.1         | 0.1         | TBRG4        | 64.08041712 | 80.18819533 |
| GSPT1        | 20.18097171 | 22.54057446 | GNA13        | 13.0075586  | 11.92593287 |
| SEC14L2      | 5.120501556 | 5.096109683 | TBRG1        | 4.971061227 | 4.684672224 |
| PGS1         | 5.553569969 | 5.323208896 | GNA14        | 0.433689455 | 0.2191302   |



|              |             |             |         |             |             |
|--------------|-------------|-------------|---------|-------------|-------------|
| BRIP1        | 1.245142035 | 1.371903812 | GNA15   | 0.197469563 | 0.117398765 |
| SEC14L1      | 19.18167426 | 16.99963445 | GNA11   | 33.50172573 | 32.30793825 |
| SEC14L4      | 0.1         | 0.1         | GNA12   | 25.50708826 | 25.22694202 |
| LOC101060398 | 10.18607226 | 10.41663636 | ZNF286B | 0.919051664 | 0.998113258 |
| TBC1D8B      | 0.1         | 0.11298588  | CYR1    | 2.209096987 | 2.099880346 |
| EGR1         | 4.672242489 | 3.613063569 | ZNF286A | 3.14941483  | 4.110537859 |
| EGR2         | 1.617207485 | 0.896920656 | KDM4A   | 17.3906713  | 16.26199612 |
| FAM78A       | 0.245189036 | 0.194243308 | KDM4B   | 6.253682011 | 6.346275398 |
| CALU         | 62.07784818 | 57.45139191 | KDM4C   | 5.608261513 | 5.265290695 |
| CALR         | 1322.152617 | 1077.480743 | KDM4D   | 0.921018836 | 1.197608145 |
| NANP         | 6.182167391 | 6.072541357 | CDK2AP2 | 39.46658842 | 35.79249728 |
| MAP1LC3B     | 37.20562007 | 34.15166567 | CDK2AP1 | 78.78903689 | 84.67288498 |
| MAP1LC3A     | 24.01659397 | 17.51616339 | CHIC2   | 4.204864138 | 3.581800411 |
| MIS18BP1     | 7.991596783 | 9.488763903 | CHIC1   | 1.461004651 | 1.533513152 |
| CHAMP1       | 11.06718943 | 10.54427151 | UXS1    | 13.29692546 | 14.84808306 |
| NANS         | 71.95196775 | 63.9378634  | VPREB3  | 0.1         | 0.226817662 |
| LOC101060376 | 0.520847428 | 0.344845981 | KRTCAP3 | 0.151692813 | 0.173819236 |
| HTATIP2      | 23.58271584 | 20.16337306 | KRTCAP2 | 391.3966383 | 380.0609014 |
| CAP1         | 281.1577199 | 268.7350686 | CHID1   | 12.77211759 | 13.13223532 |
| CANX         | 259.9507845 | 255.7674026 | WDHD1   | 5.284792563 | 5.782196543 |
| NAPA         | 146.4294301 | 104.6616738 | RBFOX2  | 20.98201548 | 21.1706208  |
| YAP1         | 27.68001616 | 26.69324413 | TOMM20L | 0.270332056 | 0.282430325 |
| NAPB         | 1.518190924 | 1.905510535 | LRRC37B | 2.571418528 | 2.011691418 |
| CAPG         | 188.6444831 | 171.0465703 | DDX39A  | 112.6000071 | 121.066479  |
| NAPG         | 5.05040432  | 4.653146642 | DDX39B  | 15.8331163  | 17.79044368 |
| CAP2         | 9.076054793 | 10.43048632 | ZBTB8A  | 0.879304578 | 1.091470963 |
| GABBR1       | 0.1         | 0.104088412 | ABCB6   | 4.868225223 | 5.299082933 |
| CCDC109B     | 24.09566806 | 22.32653975 | ABCB7   | 6.840513785 | 7.568722541 |
| TTC1         | 48.01997006 | 53.01300087 | FLII    | 58.16529512 | 54.08609548 |
| TTC9         | 0.15974845  | 0.149771739 | COPS7B  | 13.78660729 | 16.47924221 |
| TTC8         | 5.250862473 | 6.177007084 | ABCB8   | 7.494965297 | 6.813769886 |
| ITCH         | 11.77390743 | 11.96058103 | COPS7A  | 31.6327427  | 33.42650553 |
| TTC5         | 4.586197692 | 4.034828928 | IQGAP1  | 76.98933101 | 65.21286645 |
| TTC4         | 8.971846465 | 9.733641487 | TAPBPL  | 16.4854766  | 12.64080196 |
| TTC3         | 12.71859196 | 11.89588784 | ABCB9   | 4.824181277 | 5.385655973 |
| RTN4IP1      | 2.405879896 | 3.055149809 | IQGAP2  | 0.954286158 | 0.570189842 |
| CAPS         | 0.445000179 | 0.346336466 | IQGAP3  | 21.76639509 | 20.14261788 |
| CARS         | 24.42148656 | 22.57973961 | ZBTB7B  | 13.54896857 | 11.99549909 |
| NARF         | 19.30128521 | 21.96537782 | ZBTB7A  | 9.707659645 | 10.76044628 |
| TTF2         | 7.526196956 | 9.18444152  | ZBTB7C  | 0.120998899 | 0.1         |
| TTF1         | 3.244119303 | 4.264224362 | ABCA1   | 0.1         | 0.103531769 |
| CARF         | 0.698191579 | 0.622035283 | ABCA2   | 2.941583214 | 3.630178189 |
| NARS         | 57.15945693 | 65.04065842 | ABCA5   | 0.774035381 | 0.557209963 |
| AKR7A2       | 14.30279279 | 15.38239989 | ABCA3   | 11.82688496 | 11.32962452 |
| TBC1D31      | 5.109852102 | 7.338918592 | ABCA7   | 2.233209789 | 2.069216623 |
| TBC1D32      | 0.569336438 | 0.550881783 | ZFAT    | 5.427778509 | 5.35591262  |
| TBC1D30      | 0.119743328 | 0.142291297 | SRPX    | 0.673293125 | 0.684774033 |
| NARR         | 15.88972065 | 14.55744021 | SRPR    | 55.79808641 | 52.16619702 |

|              |             |             |              |             |             |
|--------------|-------------|-------------|--------------|-------------|-------------|
| CAST         | 30.37676285 | 31.72731897 | LMBR1        | 7.685523877 | 9.430434437 |
| CASK         | 3.692638213 | 3.899331184 | OFD1         | 3.316161773 | 3.73515011  |
| CDKAL1       | 3.501993581 | 3.612053387 | DFFB         | 2.028358189 | 3.168815887 |
| TBC1D2B      | 2.22360585  | 2.246044557 | SS18         | 27.38117318 | 27.25095814 |
| TBC1D20      | 13.775684   | 12.3454036  | DFFA         | 14.42928414 | 18.64708309 |
| TBC1D24      | 2.28990978  | 2.38358324  | SRP9         | 78.73242663 | 106.5739955 |
| TBC1D25      | 18.34836303 | 16.74955885 | KIAA1377     | 0.454062373 | 0.373874292 |
| TBC1D23      | 10.18009852 | 8.691031795 | SRRT         | 50.79300119 | 53.93207792 |
| TSNARE1      | 1.233881427 | 1.03148927  | LOC101927266 | 0.850198945 | 0.367827915 |
| EMID1        | 0.149196285 | 0.1         | FLNA         | 567.2113722 | 455.3992878 |
| GNAZ         | 5.703223764 | 5.314921741 | FLNB         | 52.09475085 | 42.57980453 |
| TBC1D19      | 0.785036771 | 0.862130982 | FLNC         | 0.708315456 | 0.664247001 |
| PKDCC        | 3.465096709 | 3.496467035 | FABP3        | 1.189224586 | 1.351125021 |
| TBC1D13      | 14.32903282 | 11.90398524 | FABP5        | 10.54711042 | 15.2725796  |
| RHPN1        | 2.032571399 | 1.57571728  | SRRD         | 18.78317385 | 22.90731795 |
| TBC1D14      | 3.555382691 | 5.149167244 | ZBTB25       | 1.872725228 | 2.006083208 |
| TBC1D12      | 2.142266237 | 2.087302693 | ZBTB24       | 3.293003266 | 4.222310409 |
| RHPN2        | 4.719853008 | 4.81687358  | ZBTB26       | 1.59597918  | 2.003260882 |
| TBC1D17      | 27.08312531 | 17.84952724 | ZBTB21       | 4.323342212 | 3.963665657 |
| TBC1D15      | 9.516558342 | 10.35697862 | ZBTB20       | 0.101874956 | 0.105355012 |
| TBC1D16      | 5.078703595 | 4.691868734 | ZBTB22       | 2.054998317 | 1.83704851  |
| YARS         | 78.15191854 | 81.1668784  | KIAA0895L    | 2.040532993 | 2.107448993 |
| CAV2         | 45.76332306 | 47.66216388 | ZBTB39       | 2.032141112 | 1.842319764 |
| CAV1         | 378.7829496 | 351.521465  | ZBTB38       | 8.351741108 | 7.836429363 |
| CNOT10       | 12.02203372 | 13.07966383 | ZBTB37       | 0.621631899 | 0.519011604 |
| UEVLD        | 4.066277508 | 4.124413957 | ZBTB34       | 1.707384058 | 1.710125267 |
| NAT6         | 7.611873833 | 7.343387854 | ZBTB33       | 5.385171358 | 6.564224512 |
| GNAL         | 0.124066373 | 0.16873533  | OSBP2        | 0.47108055  | 0.356411287 |
| NASP         | 40.14610408 | 48.33703331 | ZBTB18       | 6.338531154 | 5.787424823 |
| NAT1         | 1.591956947 | 1.594578491 | ZBTB17       | 13.21900934 | 12.66544807 |
| CNOT11       | 12.43791248 | 14.2276034  | ZBTB14       | 1.820894866 | 2.104273437 |
| GNAQ         | 6.029800493 | 5.427571399 | ZBTB10       | 3.958104078 | 3.633842783 |
| GNB2         | 200.3184731 | 170.389865  | ZBTB12       | 3.470565423 | 3.053610551 |
| GNB1         | 244.3393159 | 229.6680597 | ZBTB11       | 4.768409339 | 5.998544885 |
| GNB4         | 5.765501736 | 5.980360195 | FLT3         | 0.1         | 0.119309821 |
| GNAS         | 387.1197654 | 333.8194148 | FLT4         | 0.1         | 0.118999914 |
| GNB3         | 2.153196594 | 2.549796726 | FUNDC2       | 30.0193083  | 31.61252039 |
| LOC101928728 | 0.299966424 | 0.347484814 | FUNDC1       | 16.70664751 | 16.33266075 |
| GNB5         | 3.923910465 | 4.045164236 | LOC102723893 | 0.434306802 | 0.243220719 |
| NAT9         | 5.515116818 | 4.82954934  | LOC102723899 | 0.18392775  | 0.159925955 |
| SLC35E2B     | 11.73191247 | 10.41864274 | ITIH4        | 0.305716296 | 0.201689764 |
| RND2         | 0.975864496 | 1.073811203 | ZBTB47       | 7.712979938 | 8.398531456 |
| RND3         | 49.75631497 | 34.57762007 | PCOLCE2      | 18.42370163 | 16.47259748 |
| RND1         | 0.193605904 | 0.1         | ZBTB46       | 1.017566254 | 0.788930253 |
| FAM73A       | 2.409846168 | 2.790918451 | ZBTB49       | 1.600461618 | 1.209169767 |
| MYO18A       | 7.478547449 | 6.56689802  | ZBTB48       | 5.538303888 | 6.824304166 |

|         |             |             |              |             |             |
|---------|-------------|-------------|--------------|-------------|-------------|
| FAM73B  | 6.751947245 | 6.583272407 | ZBTB43       | 3.039991421 | 2.652098217 |
| PDPK1   | 4.900731333 | 5.105209829 | ZBTB42       | 3.713877667 | 1.915441732 |
| NAV1    | 7.599266936 | 6.706484389 | ZBTB45       | 13.32784054 | 14.88942628 |
| NAV2    | 7.471119327 | 5.658645974 | ZBTB44       | 1.429589486 | 1.257745511 |
| TTI2    | 12.54724769 | 14.8141535  | ZBTB41       | 2.227341646 | 2.056701945 |
| TAPBP   | 16.23363692 | 10.08490108 | ZBTB40       | 3.578054798 | 3.379566516 |
| TTI1    | 13.79793506 | 14.1643185  | KIAA1328     | 0.87111315  | 0.629412457 |
| NAV3    | 1.260062108 | 1.342458486 | FCHO1        | 0.325524923 | 0.537078547 |
| FAM72D  | 1.250613322 | 1.898129242 | FCHO2        | 3.301975915 | 3.644834993 |
| FAM72B  | 3.076147291 | 2.89690638  | KIAA1324     | 0.1         | 0.1         |
| FAM72A  | 1.792141739 | 2.101678389 | HIP1R        | 2.415616143 | 1.324735161 |
| RNF8    | 3.369027538 | 3.378149251 | DONSON       | 11.58526646 | 13.50328033 |
| RSPH9   | 0.270471787 | 0.556449953 | IL12A        | 0.820045419 | 0.408475394 |
| RNF6    | 21.40252819 | 22.9250071  | SEC62        | 8.391871757 | 7.943025809 |
| RNF7    | 18.77034855 | 20.11283491 | SEC63        | 17.28388392 | 17.16331644 |
| RNF4    | 33.7795818  | 35.66055724 | ZFP1         | 2.962678943 | 2.818627814 |
| RNF5    | 12.79082426 | 14.40588555 | ZFP3         | 3.521815841 | 3.256160285 |
| RNF2    | 7.341870488 | 8.383771832 | ZFP2         | 0.251209538 | 0.238813927 |
| GNG3    | 0.209256103 | 0.373038027 | LOC102723865 | 0.768900562 | 0.524539813 |
| GNG2    | 3.656109026 | 4.280968807 | ST8SIA4      | 1.135409823 | 0.909711315 |
| GNG5    | 311.1631051 | 297.8658252 | ST8SIA6      | 0.576785458 | 0.571369567 |
| GNG4    | 4.210520152 | 5.577673579 | ST8SIA1      | 1.142876159 | 0.924823954 |
| GNG7    | 0.210118109 | 0.108736261 | HSPA12A      | 0.153956666 | 0.125684034 |
| RSPH3   | 1.314658609 | 1.049329371 | PAICS        | 35.413443   | 55.54439513 |
| RSPH1   | 0.1         | 0.1         | HSPA12B      | 0.232023576 | 0.147133629 |
| NRDE2   | 1.965582016 | 2.264597228 | ARMC10       | 9.579217737 | 9.159562062 |
| RNH1    | 78.84263718 | 66.51639469 | DIRAS1       | 17.81969688 | 17.89384663 |
| GPATCH2 | 3.283328636 | 2.7652418   | HSCB         | 11.87688911 | 11.86569987 |
| GPATCH1 | 3.2523083   | 4.105110744 | LMCD1        | 0.560560966 | 0.659043285 |
| PHAX    | 16.29464415 | 19.15138444 | SEC13        | 209.2952808 | 174.1925906 |
| GPATCH4 | 33.48863973 | 47.65971283 | GLCC1        | 1.66048892  | 1.63978704  |
| GPATCH3 | 14.6922328  | 12.40083669 | HSF2         | 6.668552261 | 8.338563418 |
| ADARB1  | 0.539706111 | 0.61279846  | HSF1         | 100.6027841 | 97.3994444  |
| ADARB2  | 0.1         | 0.1         | LOC100507656 | 0.156239542 | 0.13011705  |
| PHB2    | 125.5331634 | 164.0730755 | HSF4         | 1.855649913 | 1.638467722 |
| GPATCH8 | 8.641655174 | 8.755481151 | TMUB1        | 49.71086906 | 52.25464521 |
| DDX17   | 48.06502386 | 47.84443032 | TMUB2        | 24.22100148 | 19.0680858  |
| DDX18   | 14.11925562 | 18.43525717 | IL17D        | 0.740946065 | 0.8421307   |
| DDX11   | 12.49491063 | 15.42072841 | SPC24        | 24.11820748 | 27.18402968 |
| DDX10   | 10.73218536 | 14.15805256 | SPC25        | 10.35912374 | 13.78656317 |
| ZNF398  | 4.146314056 | 3.972393891 | DPAGT1       | 27.37790864 | 30.12070387 |
| RHNO1   | 26.41201366 | 28.35205558 | GEMIN2       | 7.019191415 | 9.926269185 |
| ZNF397  | 1.11287495  | 1.599019831 | BAHCC1       | 2.591155222 | 3.064550991 |
| ZNF396  | 0.47267774  | 0.525758005 | KIRREL2      | 0.811661328 | 0.434628295 |
| ZNF395  | 10.583296   | 10.86055258 | GEMIN4       | 22.43355161 | 28.4112882  |
| ZNF394  | 6.154927386 | 6.91356712  | GEMIN5       | 10.57869946 | 14.85804169 |
| PDXDC1  | 17.59550409 | 14.56664519 | GEMIN6       | 11.48585581 | 14.31753974 |
| ZNF391  | 0.671341616 | 0.925609878 | GEMIN7       | 9.405177115 | 12.73498921 |

|         |             |             |          |             |             |
|---------|-------------|-------------|----------|-------------|-------------|
| PHYHIPL | 1.057760972 | 1.032534904 | GEMIN8   | 3.111375324 | 2.618160668 |
| NTHL1   | 8.6692828   | 12.7544297  | SLC1A1   | 2.976147187 | 2.69927027  |
| NRBF2   | 14.9904934  | 13.1311206  | SLC1A3   | 2.915584795 | 3.96953532  |
| PHC2    | 41.31780633 | 48.39700011 | SLC1A4   | 2.945407911 | 1.90593202  |
| ZNF384  | 22.24533247 | 22.51367837 | SLC1A5   | 128.7757003 | 108.7098593 |
| ZNF383  | 1.348149447 | 1.361134389 | SLC1A6   | 3.842689485 | 2.894933869 |
| PHC1    | 1.363923711 | 1.21017489  | SSH2     | 3.446924318 | 3.072539677 |
| ZNF382  | 2.2317114   | 2.146936655 | SSH3     | 6.276272738 | 5.517965848 |
| PHC3    | 1.284860804 | 1.198077715 | SSH1     | 11.64732021 | 10.55199339 |
| EHD1    | 70.57349222 | 60.53936002 | SIRPB1   | 14.37422156 | 10.79935336 |
| EHD2    | 199.0629542 | 160.7620373 | NUP62    | 58.97232224 | 56.24783068 |
| EHD3    | 9.436865447 | 8.82748047  | VCPKMT   | 2.587029217 | 3.079371858 |
| EHD4    | 25.08831291 | 15.98102    | NUP50    | 10.23419223 | 12.07561422 |
| ZNF37A  | 2.789555514 | 2.933105851 | NUP54    | 17.5120005  | 19.83559769 |
| ITPA    | 16.25950772 | 19.65692427 | DCTN6    | 55.46548168 | 61.6051583  |
| PHF3    | 9.364787039 | 9.465207523 | DCTN5    | 7.434709226 | 8.702052264 |
| PHF2    | 7.180291814 | 6.736589461 | DCTN2    | 76.07385994 | 73.97456591 |
| PHF1    | 46.4147332  | 35.04448247 | DCTN1    | 49.64997351 | 47.67945048 |
| PHF7    | 3.485640243 | 3.25243244  | DCTN4    | 34.52492755 | 33.85523383 |
| PHF6    | 12.71143977 | 15.04048944 | DCTN3    | 102.9134286 | 100.7675013 |
| PHF8    | 6.231588484 | 6.235416723 | CSTF2T   | 9.656001312 | 9.224623358 |
| TCTN3   | 16.33595951 | 19.79146317 | ERLEC1   | 18.22862144 | 13.96362136 |
| TCTN2   | 6.700952088 | 4.189020378 | NUP43    | 5.954665394 | 7.004441477 |
| TCTN1   | 6.403814062 | 7.333187266 | NUP35    | 7.686067149 | 11.98699416 |
| RBPMS2  | 2.754824775 | 2.478784204 | NUP37    | 17.0606724  | 20.10820887 |
| JARID2  | 3.363463848 | 3.415781625 | STMN3    | 107.7893886 | 100.3477879 |
| ZNF367  | 7.729993163 | 8.372079174 | PCMT1    | 52.86020689 | 60.49032936 |
| ZNF365  | 5.853159475 | 5.57421036  | STMN1    | 213.8941291 | 243.9966288 |
| ZNF362  | 7.050787208 | 6.546310297 | TSPYL2   | 23.62930267 | 17.14383777 |
| GNL2    | 31.13667047 | 35.57264767 | TSPYL1   | 10.97627989 | 11.75232221 |
| GNL1    | 5.737474695 | 5.736047237 | DAPK1    | 7.707820653 | 6.243835329 |
| GNL3    | 44.55690509 | 66.53007537 | DAPK2    | 0.128152787 | 0.133502679 |
| TUBB2B  | 8.66848699  | 8.055311517 | DAPK3    | 49.72647459 | 41.02355949 |
| TUBB2A  | 40.35342621 | 34.83716487 | KIAA1217 | 3.505775495 | 3.34709446  |
| ZNF358  | 51.97147471 | 46.86182136 | TSPYL4   | 2.600194466 | 2.674613227 |
| NBAS    | 3.679656482 | 3.016719368 | TSPYL5   | 0.1         | 0.116622974 |
| ZNF350  | 3.561939004 | 3.284932679 | ABO      | 0.1         | 0.1         |
| RNMT    | 5.694624056 | 6.103956608 | ABR      | 18.97381641 | 14.27827034 |
| WDR45B  | 26.5475577  | 26.38280116 | DDX26B   | 2.790333986 | 2.030410689 |
| ABI3BP  | 15.49180992 | 8.745419632 | SSR1     | 22.61766289 | 21.68028242 |
| ZNF347  | 2.110045999 | 2.1232032   | ST14     | 0.162971245 | 0.111240656 |
| ZNF346  | 6.14358666  | 7.300066604 | ACD      | 14.18166268 | 16.15139621 |
| ZNF345  | 0.441172565 | 0.376822136 | ACE      | 0.852765535 | 0.794255877 |
| ZNF343  | 3.932357849 | 3.636541009 | ST13     | 45.11670272 | 48.46432892 |
| ZNF341  | 2.016057156 | 2.411259865 | KIAA1244 | 1.531260822 | 0.867706167 |
| RNLS    | 0.1         | 0.1         | THAP10   | 3.221644879 | 3.180609795 |
| TUBB4B  | 540.2169531 | 546.5803023 | THAP11   | 17.31609126 | 19.53215068 |
| TUBB4A  | 1.524995842 | 1.771563131 | OGDH     | 63.04050572 | 61.69080172 |
| ZNF33B  | 0.996005927 | 0.916461608 | SSPN     | 1.108540122 | 0.910130697 |
| GNMT    | 0.294574071 | 0.308394192 | ST20     | 1.127720613 | 1.861147355 |

|          |             |             |                  |             |             |
|----------|-------------|-------------|------------------|-------------|-------------|
| ZNF33A   | 2.64597866  | 3.254548725 | ADA              | 3.524986276 | 3.998277255 |
| ZNF337   | 6.032707556 | 5.332109241 | ADC              | 2.573870332 | 2.053218457 |
| ZNF335   | 8.532951287 | 9.618995083 | OGFR             | 81.63345039 | 47.26477245 |
| ZNF333   | 1.50977043  | 1.468625508 | OGG1             | 17.24023037 | 19.37183589 |
| ZNF331   | 1.04952752  | 1.520873174 | ADK              | 19.28551544 | 21.94976543 |
| ZNF330   | 12.60017505 | 13.28206223 | FMN1             | 0.13071768  | 0.163057341 |
| NRBP2    | 17.44500061 | 14.37771693 | ADM              | 18.52854131 | 15.81830092 |
| ZNF329   | 4.605589799 | 3.545312241 | ADO              | 10.71625182 | 12.58093185 |
| ZNF326   | 12.63930528 | 15.33559066 | TIGD1            | 1.054986709 | 1.554673183 |
| ZNF324   | 6.67151099  | 6.770679257 | GARNL3           | 0.225083331 | 0.219082395 |
| ZNF322   | 1.597369185 | 1.639271409 | TIGD3            | 0.284786046 | 0.307335278 |
| ZNF320   | 1.403111885 | 1.189446062 | TIGD2            | 1.246167262 | 1.718977996 |
| SERF1B   | 0.427768309 | 0.451048891 | TIGD5            | 20.71250915 | 22.46107696 |
| NRBP1    | 55.63575001 | 53.19028867 | SSR4             | 221.304803  | 268.1112323 |
| ZNF319   | 1.651151872 | 1.778906573 | TIGD7            | 1.766075938 | 2.046632627 |
| ZNF318   | 5.907693342 | 5.646055073 | TIGD6            | 3.579865591 | 3.196588728 |
| ZNF317   | 11.91550009 | 11.27834148 | SSR2             | 597.7707852 | 598.9199691 |
| ZNF316   | 12.049009   | 11.35276819 | NFAM1            | 0.1         | 0.106618049 |
| PHIP     | 3.924926877 | 4.247751491 | SSR3             | 29.45890249 | 33.22121727 |
| FAM8A1   | 3.921073902 | 4.907779178 | AEN              | 8.134932077 | 8.476788746 |
| CBFβ     | 13.30317849 | 14.0576263  | LOC10192737<br>1 | 0.765615336 | 0.646550815 |
| YBEY     | 6.258491767 | 8.392006664 | AES              | 165.5376125 | 164.0360996 |
| ZNF304   | 3.463836363 | 3.249266995 | AFP              | 0.431224424 | 0.482038985 |
| ZNF302   | 3.148203692 | 3.570592776 | LMAN1            | 26.27441793 | 25.95467218 |
| ZNF300   | 3.344151685 | 4.049594672 | BCLAF1           | 11.95945439 | 14.00712027 |
| POLR3GL  | 9.660781225 | 8.672181259 | LMAN2            | 214.087083  | 208.6736931 |
| TMEM132A | 22.97627253 | 20.3015672  | AGA              | 3.484367544 | 2.728164888 |
| PHKB     | 3.873722957 | 3.727985555 | AGK              | 17.66574801 | 20.01037296 |
| NBEA     | 0.576531497 | 0.440252244 | AGL              | 1.459981073 | 1.349917534 |
| DIDO1    | 9.934024088 | 11.16681561 | FMO4             | 0.651397956 | 0.442355018 |
| CBWD6    | 2.517744129 | 2.818944118 | FMO5             | 0.139506675 | 0.19872972  |
| CBWD5    | 3.219978924 | 4.179840204 | HINFP            | 8.637216216 | 7.613340665 |
| CBWD3    | 0.942778537 | 1.024130444 | XAB2             | 27.18119297 | 25.79347329 |
| CBWD2    | 2.738424404 | 3.851095456 | KIAA1279         | 22.88099218 | 22.63343061 |
| CBWD1    | 2.866358612 | 3.498066667 | DGKE             | 0.273884295 | 0.2528081   |
| HAUS4    | 11.4544305  | 11.62681965 | DGKD             | 3.112744852 | 3.058575059 |
| HAUS3    | 1.333842828 | 1.510903106 | DGKA             | 2.873733403 | 2.321367816 |
| HAUS6    | 7.160149974 | 10.02480204 | FMR1             | 13.83275651 | 10.29227599 |
| HAUS5    | 4.042461725 | 4.705564842 | AHR              | 21.85516897 | 19.08945789 |
| HAUS2    | 3.891679617 | 4.649816632 | ZUFSP            | 5.175294359 | 5.401563325 |
| HAUS1    | 13.65638472 | 15.3197523  | MAEA             | 70.25623717 | 73.83251421 |
| EI24     | 60.41125258 | 70.53299899 | LDOC1L           | 12.59016426 | 12.75967317 |
| HAUS8    | 10.16199183 | 14.18864965 | MAF1             | 185.3977659 | 173.3245315 |
| FIP1L1   | 23.70845256 | 27.05288071 | PPTC7            | 4.133570331 | 4.672439907 |
| HAUS7    | 12.24793215 | 14.82294224 | AIP              | 40.00094022 | 41.88734535 |
| CYP51A1  | 20.05136323 | 20.82093073 | DGKZ             | 7.279396257 | 7.193478998 |
| CEACAM19 | 0.169329996 | 0.166003854 | MOB3B            | 0.147771289 | 0.219383523 |
| PI15     | 0.115434129 | 0.105510126 | ALPPL2           | 0.1         | 0.1         |
| ISCA2    | 16.57352073 | 18.44251967 | TRAIP            | 6.824918265 | 8.530492312 |

|          |             |             |          |             |             |
|----------|-------------|-------------|----------|-------------|-------------|
| ISCA1    | 16.66530239 | 18.12880132 | MOB3A    | 15.44675969 | 13.79733545 |
| FAM89B   | 151.7136375 | 133.6440866 | ST7L     | 3.151908056 | 2.524883655 |
| FAM89A   | 10.05328204 | 10.20308398 | ARMCX3   | 0.217870169 | 0.268322932 |
| CBLC     | 0.165306445 | 0.216575004 | MOB3C    | 3.333933022 | 1.982197447 |
| CBLB     | 2.340911704 | 1.694418139 | GPATCH11 | 2.826577517 | 4.13610359  |
| METTL1   | 15.7821009  | 18.84439248 | ARMCX4   | 0.1         | 0.1         |
| METTL3   | 34.59245909 | 36.03675229 | ARMCX1   | 10.21848786 | 7.047576196 |
| CYP2U1   | 1.193597118 | 1.174632993 | ARMCX2   | 0.17188001  | 0.1         |
| KATNAL1  | 5.662350861 | 5.392280985 | DGKQ     | 2.639939667 | 2.544715669 |
| KATNAL2  | 1.805424906 | 2.522315829 | ARMCX5   | 2.728859799 | 2.947503978 |
| NBL1     | 12.85996277 | 12.43047075 | MADD     | 7.62705345  | 6.270466595 |
| RALGDS   | 19.36456468 | 20.71787392 | ARMCX6   | 0.180503012 | 0.234121469 |
| RAET1E   | 0.545508807 | 0.312067648 | DGKI     | 0.404317104 | 0.480254005 |
| RAET1G   | 5.637715161 | 3.015259672 | DGKH     | 0.740776746 | 0.773340694 |
| CYP2S1   | 0.1         | 0.1         | NOTCH2   | 13.26678972 | 10.93126359 |
| RAET1L   | 0.229554307 | 0.192504155 | NOTCH3   | 14.42827934 | 11.76460089 |
| ROBO3    | 0.1         | 0.108145403 | NOTCH1   | 0.955142052 | 0.790402447 |
| ROBO4    | 7.763388785 | 5.475125461 | AK1      | 11.17753194 | 12.23104202 |
| ROBO1    | 36.33556509 | 31.53153926 | AK2      | 51.7929482  | 68.6965397  |
| CBR1     | 47.26068791 | 50.04030159 | AK3      | 7.749783503 | 11.93309046 |
| TUBB     | 493.3203127 | 524.5839663 | AK4      | 4.687866415 | 6.386607757 |
| TOPORS   | 11.60323027 | 10.88246431 | AK5      | 2.687004646 | 2.390112393 |
| METTL4   | 2.984610915 | 3.017859016 | GPATCH2L | 2.071309839 | 1.999453628 |
| METTL5   | 19.21414908 | 23.93514032 | AK6      | 32.37742061 | 39.32637522 |
| GPBP1L1  | 23.01804594 | 23.21190825 | AK7      | 0.162971245 | 0.133721969 |
| METTL6   | 4.18373222  | 4.769066688 | AK8      | 0.445355118 | 0.328976334 |
| METTL8   | 1.243119678 | 1.331152411 | AK9      | 0.32173324  | 0.334550529 |
| METTL9   | 17.58728488 | 19.39899186 | BAG6     | 51.93561803 | 49.66899838 |
| CBR4     | 2.265872769 | 2.377340299 | DSCR3    | 21.24166085 | 18.5044571  |
| CBR3     | 22.85204306 | 16.84574768 | BAG4     | 8.106827634 | 8.633984915 |
| LHFPL5   | 0.1         | 0.1         | BAG5     | 7.900399451 | 8.839693752 |
| LHFPL2   | 33.85545806 | 24.93728312 | BAG2     | 12.67661211 | 14.21132186 |
| NBR1     | 14.51350266 | 12.40506116 | BAG3     | 78.23744746 | 71.5538724  |
| COL4A3BP | 6.274769542 | 5.980782442 | BAG1     | 16.12937671 | 15.59660751 |
| FAM81A   | 1.62926383  | 1.836676689 | FN3K     | 6.698138457 | 6.157246954 |
| PHYH     | 16.94251312 | 16.51660182 | MOAP1    | 5.301575932 | 7.052278559 |
| SYCE1L   | 0.455424928 | 0.565263202 | RITA1    | 71.48555886 | 80.23279444 |
| TUFM     | 97.12923194 | 120.3918494 | MAFA     | 0.187570631 | 0.225054079 |
| FAM83H   | 4.098305911 | 4.041523246 | MOB1B    | 1.539657501 | 1.96898528  |
| FAM83G   | 10.75621756 | 10.72184485 | MOB1A    | 20.42706097 | 19.72166954 |
| FAM83F   | 0.1         | 0.1         | RCAN1    | 57.73473026 | 40.24139626 |
| FAM83E   | 0.116624409 | 0.123740266 | MAFB     | 21.19898605 | 18.56508891 |
| FAM83D   | 45.18575211 | 54.5119037  | RCAN2    | 2.319100772 | 1.565100185 |
| FAM83B   | 1.531072972 | 1.317857794 | MAFG     | 7.755519273 | 7.40689778  |
| CYP2J2   | 0.127975917 | 0.119975318 | RCAN3    | 0.1746963   | 0.153334531 |
| CBX8     | 3.527574548 | 5.66652429  | MAFF     | 21.33555847 | 14.7210582  |
| CBX7     | 4.977935518 | 4.187486567 | ALB      | 0.354323118 | 0.463182757 |
| CBX6     | 19.37183124 | 20.60539436 | MAFK     | 12.8015758  | 11.01133128 |
| CBX5     | 8.805157152 | 9.653261288 | DHCR7    | 85.03497703 | 85.0616474  |
| CBX4     | 13.76932429 | 11.61053401 | XAF1     | 42.32294905 | 18.31972144 |

|                  |             |             |          |             |             |
|------------------|-------------|-------------|----------|-------------|-------------|
| CBX3             | 50.88523629 | 60.68466018 | TRADD    | 7.510506342 | 5.261731852 |
| CBX2             | 1.85404077  | 2.274335649 | C16orf46 | 0.599278838 | 0.719174246 |
| CBX1             | 27.29827383 | 30.11840037 | C16orf45 | 20.90844158 | 15.10718282 |
| CAPRIN1          | 57.74891792 | 58.24220437 | PAGR1    | 6.877434565 | 9.904497256 |
| CAPRIN2          | 9.374554087 | 8.500689423 | SIN3B    | 10.85830259 | 9.99803461  |
| LRP10            | 68.06520172 | 46.73343293 | SIN3A    | 7.970476686 | 7.311994545 |
| LRP12            | 12.95947492 | 14.07401343 | BAI2     | 3.774485518 | 3.388125533 |
| LRP11            | 15.41896629 | 11.30309306 | AMH      | 0.717854632 | 1.331570433 |
| LOC10192885<br>2 | 0.321069264 | 0.494618789 | AMN      | 0.133366267 | 0.123824127 |
| CBY3             | 0.361939212 | 0.193514705 | AMT      | 0.524669839 | 0.756981145 |
| CBY1             | 17.10372244 | 18.22390023 | TRAF2    | 10.87011419 | 12.46472206 |
| YBX2             | 0.26409121  | 0.193731311 | TRAF1    | 1.956236638 | 1.242000172 |
| YBX1             | 716.3286659 | 906.3397519 | TRAF7    | 21.04650729 | 22.59957548 |
| YBX3             | 86.1064707  | 96.49973276 | TRAF4    | 10.75162295 | 12.06421073 |
| SPRED3           | 4.061604766 | 3.69612409  | TRAF3    | 6.139603187 | 5.719460874 |
| SPRED2           | 7.783923677 | 7.381880438 | TRAF6    | 1.382427732 | 1.288530197 |
| SPRED1           | 2.334155536 | 2.058244748 | TRAF5    | 1.334109823 | 0.955758516 |
| OBP2A            | 0.1         | 0.1         | ANG      | 1.970586078 | 1.708830448 |
| LRP5L            | 0.460272378 | 0.449847892 | TRABD    | 14.1809198  | 18.56425517 |
| OBP2B            | 0.208006813 | 0.177118849 | LUZP6    | 24.81832128 | 26.68860933 |
| CYP2R1           | 1.395184191 | 1.161790537 | NFAT5    | 1.490039356 | 1.166745959 |
| FAM84A           | 4.82507287  | 3.199449605 | LUZP1    | 7.904628036 | 7.967267481 |
| FAM84B           | 0.517050937 | 0.465459765 | KIAA1211 | 3.100180689 | 2.97740288  |
| VAC14            | 8.399236759 | 6.778107296 | ENOX2    | 3.750827616 | 3.619123284 |
| THBS2            | 0.214838735 | 0.200919343 | MGAT5B   | 3.90698566  | 2.564786725 |
| THBS1            | 62.43255978 | 35.09280408 | MAL2     | 0.837420539 | 0.600205222 |
| THBS4            | 0.58356758  | 0.491312954 | BAK1     | 19.39954679 | 19.41917885 |
| THBS3            | 30.40271285 | 30.063571   | FNIP1    | 7.569861567 | 6.38144332  |
| TCF7L2           | 1.76955781  | 2.17093867  | FNIP2    | 3.409090977 | 2.556018266 |
| TCF7L1           | 5.156258623 | 4.129763769 | SPAG9    | 19.78032177 | 14.13417625 |
| LOC10192888<br>4 | 0.570748095 | 0.367174524 | SPAG7    | 15.90960587 | 17.68377446 |
| FAM86A           | 9.147209083 | 9.843770998 | SPAG8    | 1.367104316 | 0.820095809 |
| LPIN1            | 6.829765904 | 8.196305381 | SPAG5    | 24.17930774 | 28.43690373 |
| LPIN2            | 5.145837626 | 3.422932208 | SPAG4    | 2.570509095 | 1.964788245 |
| LPIN3            | 1.404686757 | 1.280524449 | C16orf13 | 55.96909022 | 66.70088927 |
| ZNF296           | 1.311978088 | 1.900914751 | ENOX1    | 4.997609371 | 5.329133558 |
| PID1             | 2.069803911 | 2.005972394 | APC      | 7.160733621 | 6.897288616 |
| OSGEPL1          | 2.118832007 | 2.790768531 | MGAT4A   | 0.719795717 | 0.644331    |
| ZNF292           | 2.368505856 | 2.492253327 | MGAT4B   | 131.087345  | 110.7821453 |
| KIAA0020         | 25.58464982 | 34.63997741 | SPAG1    | 3.996016718 | 3.605478587 |
| AS3MT            | 0.184233931 | 0.145108431 | APP      | 327.551773  | 295.9446091 |
| PIDD             | 2.574528627 | 2.844060191 | SPARC    | 225.907166  | 180.8798138 |
| MEF2A            | 13.46457203 | 11.56265792 | B2M      | 753.3145628 | 603.1526752 |
| ZNF287           | 1.775847644 | 2.233044619 | AQR      | 8.373343125 | 7.949651307 |
| MEF2C            | 1.753985367 | 1.327062804 | MIF4GD   | 6.346422997 | 5.475966112 |
| ZNF285           | 1.650220055 | 1.233882809 | INPP4A   | 2.434238587 | 2.53345811  |
| MEF2B            | 0.887683042 | 0.866936585 | INPP4B   | 1.124727023 | 1.26557357  |
| ZNF284           | 0.523515845 | 0.75519587  | ARC      | 0.15286765  | 0.137748473 |

|          |             |             |                  |             |             |
|----------|-------------|-------------|------------------|-------------|-------------|
| ZNF283   | 1.497174494 | 1.252167283 | LOC10272397<br>4 | 2.332862907 | 2.119453173 |
| ZNF282   | 11.2890776  | 13.62401826 | MALL             | 14.66197179 | 10.80047329 |
| ZNF281   | 14.27239335 | 13.16260821 | LOC10272397<br>5 | 0.862121423 | 1.279032177 |
| SETMAR   | 4.329703783 | 5.628293395 | ARX              | 0.1         | 0.1         |
| EID1     | 44.72194809 | 44.43205226 | TMTC3            | 1.773288388 | 1.701594569 |
| EID2     | 8.491268715 | 10.21901159 | TMTC2            | 1.863873994 | 1.878030733 |
| EID3     | 2.038480484 | 2.41523968  | STC1             | 27.6635225  | 28.03782957 |
| LETMD1   | 18.96311898 | 21.83072873 | TMTC1            | 2.966713172 | 1.929481158 |
| ZNF277   | 5.532939646 | 6.188026529 | TMTC4            | 4.94337426  | 4.891329798 |
| ZNF276   | 1.640213146 | 1.753624374 | INPP5B           | 0.986460945 | 1.057752382 |
| PIF1     | 1.689368223 | 1.959493771 | INPP5A           | 4.149299669 | 3.862444357 |
| ZNF275   | 2.965495801 | 2.648851244 | SPAST            | 2.047303555 | 2.185615769 |
| ZNF274   | 18.90654172 | 16.59056714 | INPP5F           | 1.694172759 | 2.086390367 |
| ZNF273   | 0.688482974 | 0.646243951 | MAP2             | 1.225169758 | 0.627112318 |
| HHLA3    | 11.70245186 | 9.291110063 | STC2             | 126.0548647 | 82.16120984 |
| KIAA0040 | 0.1         | 0.107857269 | INPP5E           | 10.85115452 | 10.53747116 |
| GRPEL1   | 21.41245871 | 29.74573653 | INPP5J           | 0.218306352 | 0.268945818 |
| GRPEL2   | 6.022825243 | 5.919401466 | MAP7             | 0.370579568 | 0.285148833 |
| ZNF268   | 2.324457612 | 2.156568408 | INPP5K           | 16.27699906 | 15.46789743 |
| ZNF267   | 1.725851605 | 1.879304841 | ASL              | 5.343020675 | 4.041592621 |
| ZNF266   | 5.097844367 | 5.462219971 | MAP4             | 56.03416962 | 53.94730363 |
| ZNF264   | 1.522327981 | 1.447991569 | MAP9             | 0.326706786 | 0.332692165 |
| ZNF263   | 8.030546754 | 8.328401799 | BANP             | 6.520532112 | 6.80628993  |
| ZNF260   | 2.064544087 | 2.695371875 | TRAP1            | 49.47181462 | 77.22872357 |
| EIF1     | 265.4197946 | 255.6189395 | STAC             | 7.569201482 | 9.013616712 |
| FERMT1   | 2.369275348 | 2.75009768  | STAM             | 37.236732   | 34.5855347  |
| EIF5     | 31.20085698 | 35.60307915 | MANF             | 104.7771204 | 101.0719795 |
| EIF6     | 250.4069469 | 260.1421848 | LOC10272399<br>6 | 1.193587315 | 1.115933478 |
| ZNF259   | 36.85742769 | 39.38476654 | LOC10272399<br>5 | 0.408316184 | 0.24676228  |
| ZNF257   | 0.691957036 | 0.774256412 | SPATS2L          | 16.57195971 | 12.65619828 |
| ZNF256   | 2.803346992 | 2.466641371 | ATM              | 1.525146192 | 1.612393089 |
| FERMT2   | 37.82101038 | 38.72598112 | BAP1             | 44.83621176 | 44.68115405 |
| FERMT3   | 0.140714167 | 0.172676658 | ATR              | 4.115719112 | 4.71290504  |
| ZNF254   | 1.974716449 | 2.382453898 | TRAM1            | 116.4581199 | 107.8634005 |
| PIGS     | 15.09046593 | 14.85761641 | ADIRF            | 5.20235756  | 4.626371468 |
| ZNF253   | 1.594519346 | 1.597145393 | TRAM2            | 16.96557681 | 14.81256499 |
| PIGU     | 20.14888254 | 21.82600453 | HINT1            | 204.8405663 | 276.9516841 |
| ZNF251   | 10.60150732 | 9.608238572 | YAE1D1           | 3.23547642  | 3.907279795 |
| PIGT     | 123.3628473 | 128.5092351 | HINT2            | 34.99717787 | 32.21072095 |
| PIGO     | 6.933650783 | 5.942747026 | AUH              | 4.388963276 | 3.668960743 |
| ZNF250   | 3.651037945 | 3.801256367 | HINT3            | 3.512184464 | 3.436280035 |
| PIGN     | 2.742312693 | 3.234289677 | LOC10050750<br>7 | 3.42984828  | 2.51787069  |
| PIGQ     | 14.89349596 | 12.24103864 | MAPT             | 0.191463516 | 0.132653315 |
| PIGP     | 4.652431488 | 5.033141687 | TRAK1            | 13.9575072  | 12.59473297 |
| PIGZ     | 3.684808816 | 3.065908139 | TRAK2            | 8.123117388 | 8.448602744 |



|              |             |             |                |             |             |
|--------------|-------------|-------------|----------------|-------------|-------------|
| LRRC3        | 3.418245236 | 3.550275736 | DZANK1         | 0.756373661 | 0.778065403 |
| PIGW         | 2.527814236 | 3.426072651 | CGREF1         | 2.226503047 | 3.059845384 |
| PIGV         | 4.838413175 | 3.592014911 | AXL            | 73.54609044 | 58.07234617 |
| PIGY         | 19.29438773 | 24.41911042 | MARS           | 116.7987862 | 111.5733776 |
| PIGX         | 7.58635526  | 7.554788808 | KIAA1191       | 65.56228046 | 64.30043319 |
| LRRC1        | 2.517858174 | 2.549614747 | DSCC1          | 10.31166573 | 15.25482241 |
| EDRF1        | 3.174237069 | 4.331635278 | MATK           | 0.1         | 0.117349937 |
| ZNF248       | 1.185879217 | 1.377871411 | MAU2           | 12.50751796 | 11.32263893 |
| NELFCD       | 58.1141375  | 60.01391786 | ABCG4          | 0.235395562 | 0.20634241  |
| LYPLA2       | 47.56966852 | 55.65704003 | ABCG1          | 0.1         | 0.1         |
| LYPLA1       | 34.88826323 | 49.95111539 | STK4           | 10.69059619 | 11.00156649 |
| LOC101928589 | 4.244184243 | 4.335465272 | PLCXD2         | 0.245115299 | 0.238153319 |
| PIFO         | 1.702393283 | 1.289301594 | STK3           | 19.45966955 | 21.26923948 |
| ROM1         | 5.909248224 | 4.761460712 | LOC102723901   | 3.831466999 | 2.661067152 |
| DIEXF        | 7.758619785 | 8.34849064  | LOC102723902   | 2.577058309 | 3.780735561 |
| PIGC         | 13.39952691 | 13.13241705 | STIL           | 15.01424219 | 16.30784333 |
| PIGB         | 3.31591883  | 3.088469464 | LOC101929937   | 2.292037003 | 1.717326514 |
| PIGA         | 4.269283398 | 4.867203926 | AZIN1          | 37.30705531 | 40.47019189 |
| PIGK         | 10.69015439 | 11.96756722 | PLCXD3         | 0.804856452 | 0.660798222 |
| TMEM106C     | 80.84039772 | 84.23928625 | MAVS           | 13.20367355 | 12.97943736 |
| ZNF239       | 3.77507987  | 5.22393254  | C7orf55-LUC7L2 | 13.14928326 | 14.94036717 |
| TMEM106B     | 2.723882426 | 2.730872701 | ABCD4          | 2.815223535 | 2.614460425 |
| TUT1         | 8.979146065 | 10.01015409 | ABCD3          | 10.30061025 | 11.394435   |
| PIGM         | 1.470302077 | 1.71353615  | SLC2A1         | 5.224349391 | 5.355849158 |
| PIGL         | 7.294160943 | 7.033226671 | SLC2A3         | 0.165961499 | 0.297810434 |
| ZNF236       | 1.948094417 | 1.775721195 | SLC2A4         | 0.116497706 | 0.1         |
| PIGG         | 11.67485869 | 9.526402119 | SLC2A5         | 2.103043493 | 1.788864826 |
| PIGF         | 10.05976026 | 10.36341396 | CHTF18         | 4.413811392 | 5.713804613 |
| ZNF235       | 1.296436179 | 0.995447408 | SLC2A6         | 15.13049389 | 13.88369466 |
| ZNF234       | 1.46654446  | 1.519255054 | SLC2A8         | 3.275330808 | 2.299056726 |
| TMEM106A     | 0.1         | 0.1         | HEBP1          | 24.20642381 | 18.66242393 |
| ZNF233       | 0.788219566 | 0.750774845 | HEBP2          | 56.99515825 | 51.54573125 |
| PIGH         | 9.89053968  | 10.21190065 | ABCD1          | 11.52814663 | 7.854948496 |
| ZNF232       | 4.575109999 | 5.508822113 | ABCC3          | 3.790692731 | 2.55571135  |
| ZNF230       | 1.093260136 | 1.033638258 | ABCC4          | 5.185765947 | 8.22605386  |
| PET112       | 8.359159573 | 10.01724908 | ABCC1          | 5.291961867 | 5.553362334 |
| PET117       | 3.91005914  | 3.780611829 | ABCC2          | 0.449701726 | 0.628762614 |
| BGLAP        | 0.481293776 | 0.644501522 | ABCC5          | 4.587544415 | 5.518107251 |
| ZNF229       | 2.728258843 | 2.894390657 | TGFBR1         | 5.54786364  | 5.164284617 |
| ZNF227       | 4.026164746 | 4.701285281 | TGFBR2         | 29.07962389 | 27.67616903 |
| NCDN         | 30.02281378 | 33.10930253 | TGFBR3         | 9.763697317 | 7.017010877 |
| ZNF226       | 3.465206432 | 3.008133128 | DDX19A         | 14.17800632 | 17.50704427 |
| ZNF225       | 1.526710279 | 1.349602083 | DDX19B         | 13.73401473 | 14.01284746 |
| MEF2D        | 10.17776651 | 9.049703585 | STOM           | 56.50022948 | 44.32765967 |
| ZNF224       | 1.343411266 | 1.034059034 | ABCF2          | 30.73311029 | 37.27315716 |

|          |             |             |             |             |             |
|----------|-------------|-------------|-------------|-------------|-------------|
| ZNF223   | 0.896270608 | 0.791481971 | ABCF3       | 14.94610753 | 20.86811792 |
| ZNF222   | 2.042103812 | 2.266715314 | MUTYH       | 5.160538897 | 5.423877736 |
| ZNF221   | 0.142828753 | 0.34464413  | ABCF1       | 27.78485799 | 30.08043647 |
| PET100   | 27.22607469 | 32.95730337 | IGBP1       | 24.94247305 | 25.88749919 |
| ZNF219   | 2.695287281 | 1.888062348 | BAD         | 39.14834544 | 43.01285891 |
| ZNF217   | 26.63354583 | 23.98254535 | BAX         | 95.53472466 | 102.4766304 |
| GOPC     | 9.675289382 | 10.6639825  | AQP11       | 0.534334875 | 0.42735214  |
| ZNF213   | 4.584444159 | 3.523565516 | ABCE1       | 20.98456199 | 31.58670281 |
| ZNF212   | 2.66983185  | 3.611405054 | APITD1-CORT | 4.371395099 | 5.852571225 |
| ZNF211   | 4.888908961 | 4.131396109 | TOR1AIP1    | 14.02970845 | 12.17802155 |
| NCF1     | 0.1         | 0.1         | RPF1        | 25.82574627 | 37.15660246 |
| NCF2     | 0.143077344 | 0.146137023 | RASGRP3     | 1.138160406 | 0.856708636 |
| RORC     | 0.1         | 0.1         | PAC SIN2    | 14.68255002 | 13.39790863 |
| SAYSD1   | 6.902014823 | 6.547480526 | PAC SIN3    | 11.76148546 | 14.20932517 |
| TSEN2    | 4.507586047 | 6.687167853 | H1FX        | 94.62581385 | 94.15229526 |
| MTRF1    | 1.898470643 | 2.303469352 | NDUFV3      | 3.856101716 | 4.871737808 |
| PIM1     | 13.485748   | 12.71119492 | NDUFV2      | 42.44308381 | 52.82955665 |
| ZNF207   | 95.51073204 | 94.93852927 | NDUFV1      | 88.84080788 | 94.27960891 |
| PIM3     | 18.77101379 | 20.12055879 | CD99        | 21.51122917 | 22.8542489  |
| ZNF205   | 7.001359598 | 7.692185461 | PAC SIN1    | 0.112078883 | 0.1         |
| PIM2     | 9.530570169 | 9.547393946 | IVNS1ABP    | 50.82116628 | 47.66580665 |
| ZNF202   | 2.534827902 | 2.370709359 | CCZ1        | 9.261178087 | 11.61828709 |
| ZNF200   | 2.607680133 | 2.419059531 | ISG15       | 940.7530315 | 373.9891742 |
| ROR1     | 3.790527873 | 4.31236689  | ISG20       | 7.382059337 | 3.428963631 |
| ROR2     | 0.1         | 0.109053982 | H1FO        | 193.8581961 | 156.8507125 |
| RAD54L2  | 1.945088589 | 1.94057938  | SERGEF      | 2.994922763 | 3.088203574 |
| ATXN3    | 1.312841327 | 1.25288371  | DDX49       | 35.78113304 | 41.78042746 |
| ATXN2    | 13.06019734 | 11.82308187 | DDX3X       | 66.94673479 | 72.3439632  |
| PORCN    | 6.720339721 | 6.369898884 | DDX46       | 14.68185165 | 19.78688446 |
| ATXN1    | 0.842440213 | 0.69289284  | DDX47       | 24.83189575 | 30.62051647 |
| ATXN7    | 3.66549514  | 3.364409809 | DDX42       | 25.57466185 | 23.78017166 |
| THEM5    | 0.1         | 0.110387613 | ARHGEF10L   | 0.1         | 0.1         |
| C9orf89  | 12.18062409 | 12.51391857 | DDX41       | 57.17425012 | 58.79808333 |
| THEM4    | 0.1         | 0.1         | GPHN        | 3.191475338 | 4.61821085  |
| THEM6    | 61.09226776 | 63.62212114 | RPGR        | 1.234163105 | 1.790386971 |
| C9orf85  | 2.940160928 | 3.14189062  | A4GALT      | 25.25625128 | 19.77920737 |
| C9orf84  | 0.896979817 | 0.957100052 | DDX59       | 9.908042808 | 9.277608355 |
| GOT1     | 28.77456472 | 28.09066136 | DDX58       | 63.31321275 | 23.60753088 |
| GOT2     | 43.08324582 | 48.6297763  | DDX55       | 9.710395437 | 10.87108843 |
| C9orf91  | 5.678346005 | 4.794298945 | DDX56       | 36.38630279 | 41.05598919 |
| PIN1     | 68.74831996 | 73.24476246 | DDX54       | 35.35476979 | 40.04756357 |
| PIN4     | 5.505522277 | 5.831684244 | DDX51       | 2.236190702 | 2.781032358 |
| HSP90AB1 | 437.7646423 | 559.1620759 | DDX52       | 4.150622852 | 4.865367763 |
| RASGRF2  | 1.543974516 | 1.276366969 | DDX50       | 21.09772867 | 22.90508551 |
| C9orf69  | 35.67155977 | 35.42094769 | PJA2        | 28.71641504 | 24.37233794 |
| RASGRF1  | 0.108125004 | 0.123205609 | PJA1        | 6.774296    | 5.651245007 |
| LRRK1    | 3.034215748 | 2.778401987 | CREB3       | 68.7789707  | 48.27632387 |
| ARRB1    | 0.21741182  | 0.238079853 | CREB1       | 2.384389927 | 2.360775441 |
| ARRB2    | 16.87538712 | 22.48376526 | NDUFS8      | 122.2449871 | 134.318586  |
| NCK2     | 9.589928815 | 10.1191893  | NDUFS7      | 32.06272949 | 37.15358175 |

|                  |             |             |                  |             |             |
|------------------|-------------|-------------|------------------|-------------|-------------|
| HMG20B           | 41.19529675 | 45.64807652 | NDUFS6           | 114.8495239 | 149.3598591 |
| HMG20A           | 6.999982009 | 6.566891902 | NDUFS5           | 258.5826233 | 348.4343591 |
| C9orf64          | 2.388880028 | 2.004187188 | NDUFS4           | 56.96974107 | 57.38744007 |
| NCK1             | 6.09033605  | 6.695074274 | NDUFS3           | 52.80968978 | 63.92207945 |
| HSP90AA1         | 808.1269418 | 856.5129941 | NDUFS2           | 78.36621988 | 81.32312342 |
| NDUFC2           | 13.89070262 | 17.51552367 | NDUFS1           | 27.4892278  | 30.3371392  |
| NDUFC1           | 15.18529522 | 17.48143507 | CREB5            | 1.04379371  | 1.091264638 |
| PARD3B           | 1.002827554 | 0.532826666 | DDX28            | 4.74637481  | 6.320494328 |
| C9orf78          | 28.24741904 | 32.09320823 | NIM1K            | 0.826715236 | 0.859348335 |
| BIRC5            | 32.21358566 | 41.7278976  | DDX27            | 39.36706909 | 48.43941061 |
| BIRC6            | 3.233824705 | 2.790649375 | DDX24            | 74.83723394 | 77.96251706 |
| R3HCC1L          | 4.158463755 | 4.058250962 | VPRBP            | 8.622093429 | 9.68177387  |
| BIRC2            | 16.19686019 | 15.17263565 | DDX23            | 37.35798652 | 38.3977112  |
| C9orf72          | 1.266919968 | 1.588654767 | DDX20            | 9.587398445 | 11.38677193 |
| BIRC3            | 2.362673183 | 1.581404987 | DDX21            | 55.13759792 | 75.61668895 |
| NDUFB9           | 204.6536372 | 302.2188277 | DDX31            | 8.122764893 | 9.403332636 |
| NDUFB8           | 68.49432048 | 80.3731798  | RPIA             | 5.142163196 | 5.68232817  |
| NDUFB7           | 141.3960555 | 165.461173  | KATNBL1          | 3.228452811 | 4.147867039 |
| NDUFB6           | 47.40522781 | 63.04375933 | LOC10106018<br>1 | 0.281466536 | 0.41467107  |
| NDUFB5           | 26.98319148 | 30.15363039 | FAM50B           | 3.728241223 | 2.965742133 |
| NDUFB4           | 50.55268245 | 62.37539821 | FAM50A           | 210.2490634 | 196.0241425 |
| NDUFB3           | 26.67661727 | 33.66592929 | ZNF177           | 1.012915778 | 0.873110942 |
| NDUFB2           | 90.98849669 | 112.5815019 | RPL4             | 593.1593381 | 814.4469444 |
| CXXC1            | 18.98181948 | 19.97276806 | RPL5             | 512.759837  | 808.5441454 |
| PARD6G           | 1.142817604 | 1.376441589 | LOC10192865<br>7 | 2.206882097 | 2.039822991 |
| NDUFB1           | 71.47115908 | 80.11741561 | ZNF175           | 2.007854029 | 2.069861929 |
| CXXC5            | 0.28908563  | 0.20125796  | RPL3             | 728.272084  | 992.3273598 |
| PARD6B           | 0.392683251 | 0.317018957 | ZNF174           | 4.471101807 | 5.774630896 |
| NCLN             | 44.25788959 | 46.7832019  | RPL8             | 2518.776964 | 3371.516188 |
| LOC10029370<br>4 | 0.776889602 | 0.663863547 | RPL9             | 129.1133319 | 195.6216038 |
| PARD6A           | 4.436027017 | 5.279294653 | RPL6             | 406.9072338 | 594.779082  |
| CCL5             | 35.3413388  | 20.28691665 | RPL7             | 159.5264116 | 260.6094593 |
| IARS2            | 35.45146066 | 37.62269838 | ZNF169           | 1.151881874 | 1.216163043 |
| C9orf43          | 0.172021179 | 0.322839261 | ZNF165           | 0.362159514 | 0.240390032 |
| C9orf41          | 1.356232127 | 1.768562337 | ZNF160           | 5.179407329 | 4.626175609 |
| C9orf40          | 11.16059445 | 13.4698543  | SPIN2B           | 2.894847179 | 3.97375786  |
| NDUFA9           | 44.62505342 | 47.84519462 | ZNF155           | 1.906504873 | 1.851518095 |
| NDUFA8           | 36.75957557 | 45.11192679 | RPN2             | 221.4108152 | 229.3790701 |
| NDUFA7           | 74.48345181 | 92.81450553 | RPN1             | 239.3954377 | 214.7581244 |
| NDUFA6           | 41.52061272 | 47.62690041 | PTPMT1           | 3.871453403 | 4.273269931 |
| NDUFA5           | 8.812692841 | 13.17469189 | SLC19A3          | 0.844869717 | 1.09601124  |
| NDUFA4           | 39.78289961 | 52.28056904 | ZNF148           | 4.738215235 | 4.741143709 |
| NDUFA3           | 185.1580798 | 213.7582057 | ZNF146           | 23.22687129 | 29.13481661 |
| NDUFA2           | 57.14815167 | 68.10597132 | SLC19A1          | 14.2093301  | 21.2044107  |
| NDUFA1           | 97.90950295 | 107.1082736 | SLC19A2          | 1.785060661 | 2.180046701 |
| CCM2             | 56.33026283 | 46.35998971 | ZNF143           | 6.792680485 | 7.548778071 |
| CCNK             | 24.27034564 | 23.19535949 | ZNF142           | 3.698073645 | 3.603305478 |

|              |             |             |          |             |             |
|--------------|-------------|-------------|----------|-------------|-------------|
| CCNJ         | 2.634820761 | 2.49230492  | ZNF141   | 0.626533213 | 1.165204096 |
| CCNI         | 58.36259922 | 50.67400905 | ZNF140   | 3.301431806 | 2.869665489 |
| CCNH         | 20.72843434 | 24.02381067 | CDC7     | 6.05879422  | 7.28818433  |
| CCNF         | 12.30315743 | 14.24718024 | CDC6     | 12.93041691 | 15.17823787 |
| CCNC         | 11.33819111 | 13.39654219 | GPN2     | 25.49075656 | 25.03415806 |
| C9orf24      | 0.183792382 | 0.18974395  | GPN1     | 15.76469802 | 17.17059774 |
| FAM53C       | 29.24397276 | 30.29409725 | GPN3     | 8.141734893 | 10.09376839 |
| FAM53B       | 4.670626284 | 4.927411521 | TADA2B   | 4.29272829  | 3.9453368   |
| FAM53A       | 1.167491993 | 1.232727106 | TADA2A   | 3.742249641 | 3.438650674 |
| LOC101060179 | 0.878467791 | 0.868367479 | ZNF138   | 0.797206111 | 1.135999563 |
| C9orf37      | 4.178819267 | 4.826185084 | ZNF136   | 1.649242852 | 0.984950286 |
| PISD         | 9.048383749 | 8.984758034 | ZNF135   | 3.017050311 | 2.520047205 |
| CCNY         | 16.86515313 | 19.24989246 | ZNF134   | 10.10662942 | 8.020462528 |
| LACTB2       | 20.23822842 | 20.54597955 | ZNF133   | 3.832596066 | 3.495493622 |
| CCNO         | 1.840168384 | 1.704911586 | ZNF132   | 0.459939563 | 0.405956501 |
| SURF6        | 15.35482467 | 18.37597353 | ZNF131   | 14.61579798 | 14.28306354 |
| CD14         | 0.730476662 | 0.707732091 | CLINT1   | 41.45527395 | 41.71157453 |
| SURF1        | 6.078336066 | 5.857702867 | RSPO2    | 50.35201323 | 54.42781658 |
| IQSEC2       | 4.965655722 | 4.01677531  | RSPO3    | 1.528291708 | 0.585631676 |
| C9orf16      | 20.13730879 | 18.30891748 | ZNF124   | 1.943878508 | 2.124215812 |
| SURF2        | 20.45014518 | 25.64888132 | NDC1     | 15.76289018 | 22.37494687 |
| LRRN2        | 0.116194288 | 0.1         | ZNF121   | 1.113392666 | 1.504598375 |
| IQSEC1       | 4.909782546 | 4.538446521 | TIMM23   | 58.20846536 | 70.88116449 |
| ADHFE1       | 2.101289298 | 1.313634988 | TIMM22   | 26.19860009 | 30.65330137 |
| SURF4        | 152.9026469 | 129.6456681 | TIMM21   | 11.54689154 | 18.64708309 |
| LRRN4        | 0.1         | 0.112553017 | ZNF117   | 0.513728158 | 0.447540595 |
| ACER2        | 0.637658753 | 0.363930031 | ZNF114   | 0.166890056 | 0.131840486 |
| ACER3        | 4.161839071 | 3.888052529 | ZNF112   | 0.642463133 | 0.606506687 |
| LRRN1        | 6.661454001 | 4.748253612 | GPS1     | 37.53059624 | 40.00744337 |
| CD24         | 74.45552472 | 70.56705509 | TIMM13   | 33.17174023 | 42.82801698 |
| CD22         | 0.1         | 0.111267973 | GPS2     | 84.51521237 | 82.20731164 |
| FAM57B       | 0.247519007 | 0.310662562 | TIMM10   | 70.7044061  | 86.7814714  |
| FAM57A       | 15.18585158 | 13.61797017 | ATP6AP1L | 1.813432618 | 1.470233051 |
| SPTLC1       | 8.282474896 | 8.180267966 | RPS3     | 295.7987239 | 427.4261612 |
| SPTLC2       | 5.718934048 | 4.107478511 | ZNF107   | 2.599967519 | 2.222729741 |
| RSRC1        | 12.0227589  | 13.91525323 | ZNF106   | 2.940824354 | 3.202260015 |
| SPTLC3       | 0.545875719 | 0.447305587 | GLTSCR1L | 1.391804585 | 1.483558309 |
| NCS1         | 14.78708712 | 17.69947616 | RPS2     | 1411.167275 | 2045.752695 |
| RBBP8NL      | 0.1         | 0.1         | RPRM     | 12.99069755 | 12.02762787 |
| CCT3         | 203.2343012 | 267.508231  | ZNF101   | 1.932034956 | 1.744476888 |
| CCT2         | 124.1648802 | 157.1178229 | ZNF100   | 1.066189701 | 0.873268945 |
| LOC102288414 | 34.26326249 | 49.39076469 | NDE1     | 7.438645833 | 7.168248128 |
| PDRG1        | 12.14855052 | 14.73878254 | GPR1     | 2.546907168 | 1.861575817 |
| CD47         | 25.10386002 | 21.56132734 | TYW1B    | 0.281014902 | 0.334996301 |
| CD46         | 27.66035914 | 30.71115983 | GPR3     | 2.507198649 | 2.923716669 |
| CD44         | 381.7134887 | 309.6732078 | VEPH1    | 0.401131909 | 0.246209326 |
| CD63         | 535.8108254 | 463.2677066 | CTNND2   | 0.128435291 | 0.106767773 |
| MIS12        | 5.819906413 | 6.50493467  | CTNND1   | 19.18698097 | 17.99866538 |

|          |             |             |         |             |             |
|----------|-------------|-------------|---------|-------------|-------------|
| CREG1    | 0.741057218 | 0.942217001 | CDH6    | 0.784925248 | 0.688590199 |
| GPC1     | 13.22171429 | 12.78004595 | CDH5    | 0.1         | 0.10898599  |
| CREG2    | 1.366014491 | 1.025227195 | CDH3    | 20.30462432 | 15.55011926 |
| GPC3     | 0.1         | 0.1         | CDH2    | 19.82411661 | 15.0158131  |
| GPC2     | 0.571911284 | 0.905757954 | APMAP   | 70.85358018 | 78.38584689 |
| CD59     | 49.58884651 | 37.02263246 | CDH1    | 0.186315725 | 0.138519383 |
| CD58     | 6.72890846  | 6.029748428 | RPS9    | 292.5101152 | 377.1504906 |
| GPC4     | 0.1         | 0.109987659 | RPS7    | 295.1090371 | 420.3646739 |
| CCT8     | 69.21876159 | 86.78658272 | RPS8    | 887.9141631 | 1229.416452 |
| CCT7     | 121.0298918 | 149.2981398 | RPS5    | 1030.431939 | 1331.385095 |
| GPC6     | 16.56379339 | 13.28636767 | GPT2    | 8.211644561 | 10.03426381 |
| CCT5     | 221.3394669 | 267.5638717 | RPS6    | 807.0681467 | 1250.115231 |
| CD55     | 12.22315317 | 11.42937814 | RPSA    | 536.2353667 | 781.0825797 |
| CCT4     | 92.63475643 | 111.4456644 | LSMEM1  | 0.319409429 | 0.308883151 |
| CD74     | 0.4708598   | 0.47513434  | MUSTN1  | 0.598846281 | 0.557952669 |
| CD72     | 0.234241026 | 0.291701117 | CLEC7A  | 0.1         | 0.1         |
| CD70     | 217.7491067 | 199.6690518 | MPDU1   | 58.01237353 | 56.41631274 |
| FAM58A   | 28.75167251 | 30.21207293 | CDK9    | 19.47664942 | 17.74673925 |
| DKKL1    | 0.150389211 | 0.495767049 | CDK8    | 10.9443631  | 12.93656566 |
| RPA1     | 48.1653932  | 55.39549236 | CDK7    | 18.55862775 | 22.52277547 |
| RPA2     | 38.88426963 | 46.19760457 | CDK6    | 4.128999938 | 4.506048631 |
| RSRC2    | 20.21017173 | 22.30500107 | CDK5    | 15.38491049 | 16.11298875 |
| ND4L     | 4731.339527 | 5659.021129 | CDK4    | 160.6507246 | 169.0804173 |
| GPAM     | 1.333713487 | 1.577628804 | CDK3    | 0.695619736 | 0.856059438 |
| RPA3     | 11.89821974 | 12.80603183 | CDK2    | 37.61910801 | 40.2354672  |
| CD68     | 112.7077518 | 77.40616097 | CDK1    | 33.29254106 | 41.56584574 |
| CD83     | 2.867380372 | 3.333389788 | WRAP53  | 22.05124379 | 25.68154015 |
| CD82     | 15.0602821  | 8.157407885 | PTPN21  | 2.994475681 | 2.077881785 |
| CD81     | 176.4289501 | 166.0945352 | PTPN23  | 22.83781288 | 18.08736793 |
| PPFIA1   | 10.3427302  | 10.08689089 | TAPT1   | 1.707907875 | 2.177855429 |
| EP300    | 5.972451782 | 4.767177516 | GPX2    | 0.140147818 | 0.18599884  |
| PPFIA4   | 0.34047806  | 0.414793881 | GPX1    | 304.6934549 | 323.4118744 |
| PPFIA3   | 9.795672738 | 7.241917697 | GPX4    | 415.2970844 | 363.4827114 |
| PPFIA2   | 0.482866052 | 0.444971189 | GPX3    | 0.690020181 | 0.437028199 |
| CD97     | 0.382667315 | 0.514281925 | LIX1L   | 12.76247307 | 12.68153833 |
| RUNDC3A  | 0.353902521 | 0.301434516 | GPX8    | 32.50374316 | 28.83561406 |
| CD8A     | 0.1         | 0.1         | GPX7    | 1.80778376  | 1.124993634 |
| GPD2     | 8.682430232 | 8.566009729 | YDJC    | 20.94524758 | 31.39314704 |
| TOR1AIP2 | 4.982709143 | 5.541012011 | WRAP73  | 12.02524898 | 15.20839493 |
| PDS5B    | 9.280507068 | 9.504642558 | CDNF    | 0.295305553 | 0.183671052 |
| RPF2     | 8.725713106 | 13.89476982 | NDNF    | 0.769521856 | 0.746014737 |
| PDS5A    | 16.54110229 | 19.40695522 | HIRIP3  | 5.605335454 | 5.844240956 |
| DDX60    | 9.740884102 | 4.888708428 | RASGRP1 | 0.1         | 0.114763847 |
