# Supplementary material for: MYC suppresses STING-dependent innate immunity by transcriptionally upregulating DNMT1 in triple-negative breast cancer
Source: PubMed Central journal article supplement — J Immunother Cancer. 2021 Jul 28;9(7):e002528. doi: 10.1136/jitc-2021-002528 (PMC8320259; doi:10.1136/jitc-2021-002528), 2021-07-28
Supplement: jitc-2021-002528supp004.pdf [file jitc-2021-002528supp004.pdf]

**Supplemental Table S4. Sequences for sgRNA targeting human STING, IRF3, DNMT1 and mouse STING**

|                   | Forward (5'-3')       | Reverse (5'-3')       |
|-------------------|-----------------------|-----------------------|
| STING-sg1 (human) | GGTGCCTGATAACCTGAGTA  | TACTCAGGTTATCAGGCACC  |
| STING-sg2 (human) | GCTGATTGTAAGTTCGAATC  | GATTCGAACTTACAATCAGC  |
| STING-sg3 (human) | GGATGTTCAAGTGCCTGCGAG | CTCGCAGGCACTGAACATCC  |
| STING-sg4 (human) | GCGGGCCGACCGCATTGGG   | CCCAAATGCGGTGCGCCCCGC |
| STING-sg5 (human) | CATATTACATCGGATATCTG  | CAGATATCCGATGTAATATG  |
| STING-sg6 (human) | ACTCTTCTGCCGACACTTG   | CAAGTGTCGGCAGAAGAGT   |
| IRF3-sg1 (human)  | GGCACCAACAGCCGCTTCAG  | CTGAAGCGGCTGTTGGTGCC  |
| IRF3-sg2 (human)  | TTTAGCAGAGGACCGGAGCA  | TGCTCCGGTCTCTGCTAAA   |
| IRF3-sg3 (human)  | ATCAGGCCCATGCCCGCTGT  | ACAGCGGGCATGGGCCTGAT  |
| DNMT1-sg1 (human) | CTAGACGTCCATTCACCTCC  | GGAAGTGAATGGACGTCTAG  |
| DNMT1-sg2 (human) | TTTCCAAACCTCGCACGCC   | GGGCGTGCGAGGTTTGAAA   |
| DNMT1-sg3 (human) | ACGTAAAGAAGAATTATCCG  | CGGATAATTCTTCTTTACGT  |
| STING-sg1 (mouse) | ACCTGCATCCAGCCATCCCA  | TGGGATGGCTGGATGCAGGT  |
| STING-sg2 (mouse) | TCGGGACCTTTAGAGGAATT  | AATTCCTCTAAAGGTCCCGA  |
| STING-sg3 (mouse) | CCAGCCATCCCACGGCCCAG  | CTGGGCCGTGGGATGGCTGG  |
| STING-sg4 (mouse) | TGGCCAGCCTGATGATCCTT  | AAGGATCATCAGGCTGGCCA  |
| STING-sg5 (mouse) | ATATGTAGCCCTCATCTTTC  | GAAAGATGAGGGCTACATAT  |
| STING-sg6 (mouse) | AAATTCCTTGCTCAGATTTT  | GAAATCTGAGCAAGGAATTT  |
